# Supplementary material for: Nasal anti-CD3 mAb (Foralumab) dampens CD3+ T effector function and decreases NKG7 in COVID-19 through a mechanism involving GIMAP-7 and TGFb1
Source: Research Square preprint supplement (doi:10.21203/rs.3.rs-2061549/v1), 2022-10-13
Supplement: Supplementary file 1 [file 0876f1ea814e77589a91be49.xlsx]

## Sheet: Sheet1
Expanded data 1: DEG found in Smart2-Seq RNA-seq - COVID-19 subjects : Comparison between untreated controls and Foralumab
T cells										B cells										Monocytes
gene	log2FoldChange.x	pvalue.x	padj.x	log2FoldChange.y	pvalue.y	padj.y	group	top_p		gene	log2FoldChange.x	pvalue.x	padj.x	log2FoldChange.y	pvalue.y	padj.y	group	top_p		gene	log2FoldChange.x	pvalue.x	padj.x	log2FoldChange.y	pvalue.y	padj.y	group	top_p
IFI44L	-1.83796	6.16775e-11	5.51274e-07	-0.929993	1.3363e-05	0.00871576	both	5.51274e-07		IFI44L	-3.28756	7.44028e-21	6.9016e-17	-0.800622	0.000587205	0.214672	both	6.9016e-17		IFI44L	-4.45851	2.21973e-47	1.99842e-43	-2.6303	1.86399e-09	6.79891e-06	both	1.99842e-43
ISG15	-0.916298	0.00298793	0.494558	-1.77787	1.49209e-09	6.32571e-06	both	6.32571e-06		IFIT3	-2.81985	2.14303e-13	9.93938e-10	-0.872047	0.0132905	0.915353	both	9.93938e-10		IFI27	-5.57746	1.06365e-43	4.78803e-40	-0.952784	1.49682e-05	0.00436772	both	4.78803e-40
XAF1	-1.17626	4.58715e-05	0.0341666	-1.71558	3.07434e-09	8.68912e-06	both	8.68912e-06		IFITM1	-2.26807	5.99455e-13	1.85351e-09	-1.29627	0.000172079	0.127457	both	1.85351e-09		SIGLEC1	-4.24962	2.57677e-39	7.73289e-36	-2.70311	9.7424e-10	6.79891e-06	both	7.73289e-36
EIF2AK2	-0.949271	0.00114869	0.273868	-1.55477	3.87053e-08	8.20456e-05	both	8.20456e-05		XAF1	-2.17317	9.43176e-11	2.18722e-07	-1.28874	0.00026307	0.152712	both	2.18722e-07		IFI6	-2.72586	4.42594e-24	9.96168e-21	-2.09586	1.65502e-07	0.000166482	both	9.96168e-21
IFI6	-1.01896	0.000825522	0.245951	-1.53721	1.90447e-07	0.00032296	both	0.00032296		IFI6	-2.18721	9.90083e-10	1.8368e-06	-0.966103	0.00613093	0.795296	both	1.8368e-06		IFITM3	-2.26145	3.02403e-17	5.44507e-14	-1.86706	4.18678e-06	0.00152713	both	5.44507e-14
MX1	-0.798393	0.00108216	0.273868	-1.48098	4.24854e-07	0.000600389	both	0.000600389		IFI44	-2.17006	4.57986e-09	6.06897e-06	-1.06368	0.00277618	0.52256	both	6.06897e-06		LY6E	-2.26329	1.75517e-16	2.63363e-13	-1.87509	8.0494e-07	0.000419431	both	2.63363e-13
LGALS9	-0.812572	0.0062239	0.751747	-1.36902	5.13682e-06	0.00483945	both	0.00483945		MX1	-1.91278	6.04086e-09	7.00438e-06	-1.16439	0.00040091	0.177652	both	7.00438e-06		OTOF	-3.65126	1.25025e-14	1.608e-11	-0.312386	0.0112864	0.253336	both	1.608e-11
IFI44	-0.989042	0.000996616	0.273868	-1.33425	7.9119e-06	0.0067085	both	0.0067085		ISG15	-2.00992	1.86619e-08	1.92342e-05	-0.919292	0.00860171	0.889862	both	1.92342e-05		IFITM1	-2.78222	1.21996e-13	1.37291e-10	-2.15897	2.28214e-07	0.000166482	both	1.37291e-10
OAS1	-1.14561	0.000193808	0.0911712	-1.27515	2.26244e-05	0.0112842	both	0.0112842		EIF2AK2	-1.70708	8.39052e-08	7.0755e-05	-0.731368	0.0323251	0.999641	both	7.0755e-05		IFI44	-2.26789	6.75706e-13	6.75931e-10	-2.00219	1.02419e-06	0.000473175	both	6.75931e-10
LY6E	-1.01993	0.000188351	0.0911712	-1.13154	3.5139e-05	0.0156813	both	0.0156813		SLFN5	-1.56096	1.07095e-05	0.00551894	-0.719028	0.0405609	0.999641	both	0.00551894		ISG15	-2.35265	2.306e-12	2.07609e-09	-2.22754	2.18089e-07	0.000166482	both	2.07609e-09
HDAC2	-0.59901	0.0487263	0.99975	-1.12948	6.6718e-05	0.0246453	both	0.0246453		SPTLC2	-1.46776	2.12717e-05	0.0103851	-0.65516	0.0482436	0.999641	both	0.0103851		IFITM2	-1.55011	9.83935e-12	7.38197e-09	-1.34207	0.000100242	0.0149238	both	7.38197e-09
SHISA5	-0.878284	0.00118041	0.273868	-0.864258	9.69826e-05	0.0328926	both	0.0328926		EPSTI1	-1.32611	9.57452e-05	0.0349977	-1.54686	7.11527e-06	0.0578258	both	0.0349977		XAF1	-1.77568	1.39459e-10	9.65808e-08	-1.63991	4.62776e-05	0.00843987	both	9.65808e-08
ARHGAP26	-1.18444	3.8845e-05	0.0341666	0.661125	0.0232948	0.828279	both	0.0341666		IFI35	-1.32158	0.000181331	0.0519376	-0.872412	0.0123951	0.895566	both	0.0519376		SCO2	-1.47078	3.27561e-10	2.10645e-07	-1.59006	2.92617e-05	0.0064686	both	2.10645e-07
HERC6	-1.28771	4.52441e-05	0.0341666	-0.778023	0.00940396	0.643006	both	0.0341666		IRF9	-1.02836	0.000184772	0.0519376	-0.572407	0.03255	0.999641	both	0.0519376		OAS2	-2.15621	8.49639e-10	5.09954e-07	-1.92614	1.01617e-05	0.00353	both	5.09954e-07
RNF213	-0.370333	0.0493109	0.99975	-0.708908	0.000291853	0.0798265	both	0.0798265		SMARCA2	1.14738	0.000342604	0.0882778	-1.15682	0.000188198	0.127457	both	0.0882778		TIMP1	1.64951	3.85444e-09	2.04455e-06	1.39487	0.00116101	0.0723896	both	2.04455e-06
IFITM1	-0.615809	0.00219464	0.394488	-0.834365	0.000323819	0.0832019	both	0.0832019		SAMD9L	-1.23097	0.000398649	0.0973123	-1.17001	0.000941715	0.276968	both	0.0973123		MX1	-1.95393	1.0739e-08	5.36017e-06	-1.75988	3.72396e-05	0.00731715	both	5.36017e-06
DDX60	-0.634885	0.0351496	0.99975	-1.05927	0.000357249	0.0865462	both	0.0865462		IRF7	-1.32712	0.000410963	0.0977461	-0.722077	0.0440695	0.999641	both	0.0977461		LGALS3BP	-1.60367	1.13121e-08	5.36017e-06	-1.46367	0.000207442	0.0236452	both	5.36017e-06
HSH2D	-0.495497	0.0327141	0.99975	-0.965969	0.000393295	0.0926318	both	0.0926318		RARS1	1.26446	0.000478497	0.108257	-0.878503	0.0119036	0.895566	both	0.108257		CXCL8	2.03367	1.31259e-08	5.90861e-06	1.8614	2.4365e-05	0.00622095	both	5.90861e-06
OAS2	-0.900781	0.000796101	0.245364	-0.948857	0.000809713	0.146076	both	0.146076		C1orf162	-0.774928	0.0369923	0.999923	-1.2805	0.000106944	0.108642	both	0.108642		RSAD2	-2.18344	1.14657e-07	4.69208e-05	-2.16119	1.03781e-06	0.000473175	both	4.69208e-05
CHD7	0.563645	0.0156957	0.916914	0.90114	0.000917457	0.158758	both	0.158758		BST2	-1.15114	0.000749766	0.144892	-0.630268	0.0414545	0.999641	both	0.144892		GIMAP4	-2.16201	1.24509e-07	4.87373e-05	-2.47372	3.24474e-08	5.9176e-05	both	4.87373e-05
ISG20	-0.596646	0.0270058	0.99975	-0.873848	0.00102275	0.173437	both	0.173437		PHLDB2	1.307	0.000932275	0.172956	-0.835976	0.0144578	0.942699	both	0.172956		OAS1	-1.67498	5.88601e-07	0.000170941	-2.25916	2.94404e-08	5.9176e-05	both	5.9176e-05
IFI35	-0.85858	0.00619321	0.751747	-0.976176	0.00134509	0.203662	both	0.203662		ARID3A	1.03121	0.00506849	0.500163	1.19678	0.000459219	0.177718	both	0.177718		MX2	-1.54612	2.27595e-07	8.53767e-05	-1.60992	1.08301e-05	0.00359115	both	8.53767e-05
PSMB9	-0.615397	0.0233586	0.99975	-0.802693	0.00235746	0.298342	both	0.298342		MX2	-1.0051	0.00133066	0.237369	-0.767722	0.0311746	0.999641	both	0.237369		BZW1	1.23089	2.44559e-07	8.80704e-05	1.00667	0.0204158	0.3305	both	8.80704e-05
ADAR	-0.406581	0.0290862	0.99975	-0.609607	0.00391389	0.430985	both	0.430985		SP110	-0.832559	0.00152283	0.256832	-0.734898	0.0206737	0.971522	both	0.256832		IFIT3	-1.77775	1.40607e-05	0.00230161	-2.37022	6.26283e-08	9.13747e-05	both	9.13747e-05
RPS3	0.373424	0.0456112	0.99975	0.461175	0.00582891	0.543221	both	0.543221		UBXN7	0.920328	0.001745	0.27908	0.966256	0.00371343	0.615899	both	0.27908		JUP	-1.80657	2.99408e-07	9.70376e-05	-1.09031	0.0182686	0.316554	both	9.70376e-05
PSME2	-0.649206	0.0142212	0.909775	-0.653725	0.00621457	0.545383	both	0.545383		TBCE	1.04445	0.00360744	0.408081	-0.780743	0.0245191	0.981611	both	0.408081		CLEC5A	2.07814	3.00549e-07	9.70376e-05	1.19872	0.00940895	0.228178	both	9.70376e-05
PSMB8	-0.414074	0.0460729	0.99975	-0.594317	0.00661365	0.572216	both	0.572216		MRPS18B	-0.902797	0.00407639	0.435405	-0.656811	0.0325942	0.999641	both	0.435405		SERPING1	-2.06263	3.01794e-07	9.70376e-05	-2.23573	1.22316e-06	0.000521335	both	9.70376e-05
GAA	0.819359	0.00774372	0.814274	0.790731	0.0078706	0.601214	both	0.601214		IGKV6-21	-0.497213	0.0049379	0.492516	0.710853	0.0259188	0.999641	both	0.492516		SERPINB9	1.0671	6.89522e-07	0.000193993	1.35816	8.4478e-08	0.000102711	both	0.000102711
TPT1	0.513906	0.00764361	0.813317	0.535505	0.00834933	0.620999	both	0.620999		SOS2	0.990967	0.00794947	0.682771	0.706602	0.0416036	0.999641	both	0.682771		PARP9	-1.72974	4.37823e-07	0.000135922	-1.40451	0.000340968	0.0318892	both	0.000135922
CEP290	-0.781104	0.00448907	0.626926	-0.647288	0.0126004	0.709778	both	0.626926		KCNAB2	-0.818488	0.00855306	0.695297	-0.831895	0.00817379	0.885712	both	0.695297		CXCL3	1.86168	5.04739e-07	0.000151472	1.36732	0.00206016	0.0994618	both	0.000151472
HLA-DRA	0.783561	0.00905891	0.87063	0.696556	0.00898086	0.637427	both	0.637427		SHISA5	-0.902725	0.00895686	0.695925	-0.84329	0.00695204	0.846337	both	0.695925		PDE4B	0.748569	0.0394095	0.357665	1.82036	1.91748e-07	0.000166482	both	0.000166482
RPL3	0.42908	0.0408532	0.99975	0.506511	0.0100077	0.662935	both	0.662935		EFL1	-0.971991	0.00979529	0.738708	-0.972969	0.00593597	0.790847	both	0.738708		ZBP1	-1.95014	2.43507e-06	0.000521976	-2.35918	3.04342e-07	0.000185014	both	0.000185014
EEF1B2	0.474483	0.0294416	0.99975	0.533141	0.0125651	0.709778	both	0.709778		KIAA0040	-0.886068	0.0104997	0.760897	-0.713907	0.0456058	0.999641	both	0.760897		OAS3	-1.62994	7.127e-07	0.000194438	-1.19692	0.0013522	0.0795507	both	0.000194438
EEF1G	0.450331	0.039439	0.99975	0.548451	0.0129804	0.719352	both	0.719352		AKAP6	-0.893974	0.0151598	0.854766	-0.700565	0.0412801	0.999641	both	0.854766		EPSTI1	-1.86212	1.41117e-06	0.00035291	-2.05717	3.57984e-07	0.000200884	both	0.000200884
RPL7	0.492337	0.012819	0.909775	0.502252	0.0134333	0.725154	both	0.725154		IL2RG	-0.71023	0.0298972	0.984763	-0.621214	0.0103935	0.895566	both	0.895566		SAMD9L	-1.93498	1.06693e-06	0.000274446	-1.21337	0.00794341	0.215826	both	0.000274446
SPOP	-0.686376	0.0153173	0.909775	0.610128	0.0134075	0.725154	both	0.725154		IGKV1-17	-0.747217	0.0464987	0.999923	0.575428	0.0140522	0.942524	both	0.942524		IL1RN	1.69481	1.53068e-06	0.000372452	1.64682	0.000289466	0.0292471	both	0.000372452
MTMR12	-0.739713	0.0153343	0.909775	-0.704554	0.0149357	0.742661	both	0.742661		GAPT	-0.785496	0.0279656	0.984541	-0.851032	0.0149562	0.942699	both	0.942699		EEF1B2	1.18563	1.62451e-06	0.000383955	0.991888	0.00443999	0.148577	both	0.000383955
HSPA6	0.257869	0.00920408	0.875171	0.306652	0.0170365	0.745881	both	0.745881		COX11	0.816319	0.0345623	0.999923	-0.853871	0.0181047	0.942699	both	0.942699		PARP14	-1.40652	2.1411e-06	0.000481908	-1.28107	0.00113374	0.0719185	both	0.000481908
RPS3A	0.422037	0.0484226	0.99975	0.524921	0.0165539	0.745881	both	0.745881		SAFB2	0.646716	0.0376252	0.999923	0.63463	0.0183394	0.942699	both	0.942699		CXCL2	1.65485	1.35446e-05	0.00225819	2.07087	1.28636e-06	0.000521335	both	0.000521335
HLA-DPA1	0.596347	0.0419654	0.99975	-0.684618	0.0181632	0.755916	both	0.755916		POLH	-0.730728	0.0400298	0.999923	-0.810028	0.0226332	0.971733	both	0.971733		PMP22	2.0434	2.38043e-06	0.000521976	0.891534	0.0382733	0.43831	both	0.000521976
RPL4	0.456051	0.0335064	0.99975	0.501195	0.0233469	0.828279	both	0.828279		ECD	0.770605	0.0254111	0.974021	-0.51951	0.0322205	0.999641	both	0.974021		DUSP4	1.76654	2.52451e-06	0.000528562	1.14156	0.00209499	0.0994618	both	0.000528562
PACS2	0.788437	0.0103148	0.886603	0.662063	0.02722	0.854809	both	0.854809		DOCK8	-0.61297	0.0261092	0.984541	-0.428132	0.0428546	0.999641	both	0.984541		CX3CR1	-1.88474	2.88683e-06	0.000590684	-1.51102	0.000883144	0.0596531	both	0.000590684
PSMC5	-0.520976	0.0203216	0.997304	-0.479325	0.0287589	0.872866	both	0.872866		FGD3	-0.597157	0.0287615	0.984541	-0.575598	0.0275088	0.999641	both	0.984541		H1-0	-1.55578	3.33276e-06	0.000666773	-1.46956	6.2371e-05	0.010111	both	0.000666773
ACTR3	-0.559119	0.027435	0.99975	-0.532888	0.0313377	0.894654	both	0.894654		N4BP1	-0.814299	0.0280444	0.984541	0.776415	0.026881	0.999641	both	0.984541		USP18	-2.14196	4.2753e-06	0.00083675	-1.93864	3.81154e-05	0.00731715	both	0.00083675
RGS2	0.676148	0.0145688	0.909775	0.519321	0.0461775	0.99879	both	0.909775		GOLGA4	0.642092	0.038115	0.999923	0.705239	0.0266349	0.999641	both	0.999641		CMPK2	-2.05913	4.78958e-06	0.000898346	-2.01221	2.24972e-05	0.00607842	both	0.000898346
DHX58	-0.676141	0.0283628	0.99975	-0.603438	0.0423031	0.995141	both	0.995141		IRAK3	0.787134	0.0365238	0.999923	-0.765636	0.0318	0.999641	both	0.999641		ARFGAP3	1.32319	5.38865e-06	0.000990083	1.19319	0.00264681	0.112258	both	0.000990083
GLIPR2	-0.575291	0.0406002	0.99975	-0.549347	0.0456588	0.99879	both	0.99879		ZNF250	0.766407	0.038984	0.999923	0.700898	0.0305292	0.999641	both	0.999641		NFKB1	1.1351	8.11498e-06	0.00145694	1.24285	2.69966e-05	0.00622095	both	0.00145694
ZNF880	-0.675225	0.0270916	0.99975	-0.584578	0.0494126	0.999787	both	0.99975		IGKV1-6				1.49891	2.20648e-05	0.0770206	Foralumab	0.0770206		PLAC8	-1.54871	8.25324e-06	0.00145694	-1.73446	5.11268e-05	0.00909684	both	0.00145694
IFIT3				-1.86702	4.42736e-10	3.75396e-06	Foralumab	3.75396e-06		SESN1				-1.4545	2.84314e-05	0.0770206	Foralumab	0.0770206		INHBA	1.08877	0.0112717	0.190466	2.15968	4.07812e-06	0.00152713	both	0.00152713
MX2				-1.31257	2.78301e-06	0.00337102	Foralumab	0.00337102		ARHGAP26				-1.43882	4.62242e-05	0.0873224	Foralumab	0.0873224		IFI35	-1.36937	1.55331e-05	0.00249723	-1.26182	0.00214773	0.100434	both	0.00249723
RALY				-1.34059	3.95983e-06	0.00419692	Foralumab	0.00419692		DOCK9				-1.38438	5.37236e-05	0.0873224	Foralumab	0.0873224		CRLF2	1.77461	1.67042e-05	0.0025929	1.59037	0.000435681	0.0373167	both	0.0025929
PARP9				-1.24949	9.19382e-06	0.00708676	Foralumab	0.00708676		RREB1				1.31991	7.96077e-05	0.0984445	Foralumab	0.0984445		EHD1	1.14428	1.89785e-05	0.00289599	0.950255	0.00702704	0.197162	both	0.00289599
GBP1				-1.24625	1.12964e-05	0.00798183	Foralumab	0.00798183		ZNF318				-1.38544	8.47929e-05	0.0984445	Foralumab	0.0984445		RNF213	-1.3614	1.97392e-05	0.00296187	-1.41172	0.000253617	0.0268136	both	0.00296187
RSAD2				-1.31065	1.54831e-05	0.00937722	Foralumab	0.00937722		IGHV3-20				1.32222	0.000183746	0.127457	Foralumab	0.127457		ADAR	-0.897779	2.23351e-05	0.00314192	-0.840854	0.0044891	0.149534	both	0.00314192
HIF1AN				-1.16954	1.74635e-05	0.00984207	Foralumab	0.00984207		ZBTB16				-1.32866	0.000144684	0.127457	Foralumab	0.127457		GPBAR1	-1.44157	2.29891e-05	0.00318417	-1.20137	0.00400622	0.14468	both	0.00318417
USP18				-1.31191	1.85721e-05	0.00984207	Foralumab	0.00984207		MRPL19				1.25949	0.00026298	0.152712	Foralumab	0.152712		IL1B	1.43061	2.44245e-05	0.00333173	1.65311	6.14813e-05	0.010111	both	0.00333173
FOS				0.942733	3.22325e-05	0.0151833	Foralumab	0.0151833		IGHV5-51				1.27614	0.000296167	0.160463	Foralumab	0.160463		TRPS1	1.29768	2.69563e-05	0.00356894	1.01774	0.00654351	0.19094	both	0.00356894
IFIT1				-1.22516	5.80614e-05	0.0240753	Foralumab	0.0240753		CDCA7L				-0.961526	0.000401798	0.177652	Foralumab	0.177652		TNFSF10	-1.68317	2.78442e-05	0.00363307	-1.81824	2.57551e-05	0.00622095	both	0.00363307
SAMD9				-1.09939	5.96274e-05	0.0240753	Foralumab	0.0240753		CLMN				-1.2323	0.000382153	0.177652	Foralumab	0.177652		DHX58	-1.63874	3.40008e-05	0.00425152	-1.25445	0.00598903	0.180537	both	0.00425152
CMPK2				-1.15324	6.68526e-05	0.0246453	Foralumab	0.0246453		TXNIP				-1.0531	0.000415331	0.177652	Foralumab	0.177652		IFIT1	-1.41242	0.000462057	0.0261629	-2.0001	1.48645e-05	0.00436772	both	0.00436772
PPM1K				-0.753488	8.56644e-05	0.0302645	Foralumab	0.0302645		POLG				-1.21376	0.000445769	0.177718	Foralumab	0.177718		TNFSF8	1.52726	3.79086e-05	0.00467523	1.50946	0.000490112	0.0397263	both	0.00467523
BST2				-1.09412	0.000137527	0.0448497	Foralumab	0.0448497		METTL16				1.13372	0.000648174	0.214672	Foralumab	0.214672		NAP1L1	0.879611	4.07696e-05	0.00496012	0.649201	0.0221998	0.34332	both	0.00496012
ZNF518B				1.11633	0.000154029	0.0483708	Foralumab	0.0483708		TCL1A				-1.19206	0.00068302	0.214672	Foralumab	0.214672		IRF7	-1.44513	4.15138e-05	0.00498332	-1.22372	0.00290076	0.120233	both	0.00498332
IRF9				-0.957822	0.000177564	0.0537703	Foralumab	0.0537703		TRIM22				-0.801551	0.00068678	0.214672	Foralumab	0.214672		IER3	1.33806	4.35267e-05	0.0051562	1.39517	0.000439923	0.0373167	both	0.0051562
OAS3				-0.97552	0.000184347	0.0538993	Foralumab	0.0538993		TSPAN13				-1.17323	0.000618151	0.214672	Foralumab	0.214672		PHACTR1	0.989791	5.16799e-05	0.00574413	0.807756	0.0154462	0.298938	both	0.00574413
C5orf63				1.0978	0.000284591	0.0798265	Foralumab	0.0798265		RIPOR3				-1.14996	0.00095424	0.276968	Foralumab	0.276968		RUFY4	-1.1534	0.00681587	0.14139	-2.16679	2.21485e-05	0.00607842	both	0.00607842
CENPP				-1.0046	0.000315903	0.0832019	Foralumab	0.0832019		GAB2				1.13109	0.00110043	0.289478	Foralumab	0.289478		HSPA5	1.07384	5.61256e-05	0.00608794	0.861282	0.0283759	0.389372	both	0.00608794
CRYBG1				1.05401	0.000348276	0.0865462	Foralumab	0.0865462		MGAT4A				1.1187	0.00104958	0.289478	Foralumab	0.289478		TNIP1	0.71092	0.00426356	0.106036	1.2818	2.72886e-05	0.00622095	both	0.00622095
GGCX				1.03487	0.000442604	0.098759	Foralumab	0.098759		NRBP1				0.766788	0.0011042	0.289478	Foralumab	0.289478		IL17RA	-0.960308	5.83593e-05	0.00625487	-0.953753	0.0044269	0.148577	both	0.00625487
PPT2-EGFL8				0.96019	0.000440507	0.098759	Foralumab	0.098759		PCNT				1.05354	0.00119188	0.302699	Foralumab	0.302699		NLN	-1.62142	5.90749e-05	0.00625707	-0.822843	0.0460033	0.478055	both	0.00625707
RASA4				0.938506	0.000479647	0.10428	Foralumab	0.10428		AEN				-0.808022	0.0013613	0.335252	Foralumab	0.335252		PPIF	0.922995	0.000672728	0.0328696	1.3343	3.12612e-05	0.00651572	both	0.00651572
SENP1				-1.05595	0.000500692	0.106134	Foralumab	0.106134		IGLV2-11				0.946574	0.00144925	0.346414	Foralumab	0.346414		RPS3A	1.13395	6.35857e-05	0.00654076	0.801985	0.0148274	0.293133	both	0.00654076
KLF13				1.02342	0.000567256	0.117311	Foralumab	0.117311		MOB4				1.00122	0.00187511	0.435401	Foralumab	0.435401		EREG	0.995363	6.36648e-05	0.00654076	1.16092	0.00124029	0.0750137	both	0.00654076
BRD8				0.84775	0.000737986	0.142213	Foralumab	0.142213		ABHD2				0.975518	0.00207595	0.460697	Foralumab	0.460697		METTL7A	-1.33549	6.39328e-05	0.00654076	-0.788857	0.022601	0.345648	both	0.00654076
RNASEH2B				-0.905496	0.000730632	0.142213	Foralumab	0.142213		INTS8				-1.04987	0.00215411	0.460697	Foralumab	0.460697		IRAK2	1.14003	6.47815e-05	0.00655312	1.37485	4.62466e-05	0.00843987	both	0.00655312
RRN3				0.718847	0.000733352	0.142213	Foralumab	0.142213		VPREB3				-0.912973	0.00214331	0.460697	Foralumab	0.460697		FGD2	-1.1153	7.6187e-05	0.00745556	-0.844251	0.0281013	0.388256	both	0.00745556
HECW1				1.02115	0.000756643	0.142568	Foralumab	0.142568		APOBEC3D				-0.941174	0.00233091	0.485725	Foralumab	0.485725		SHISA5	-1.19482	7.73618e-05	0.00748912	-1.19474	0.000247288	0.0268136	both	0.00748912
FOSB				0.901457	0.000781598	0.144069	Foralumab	0.144069		PDAP1				-1.05714	0.0024178	0.491236	Foralumab	0.491236		STAT2	-1.12293	8.33449e-05	0.00798249	-1.15045	0.000940013	0.0629119	both	0.00798249
TUBA1B				-0.74208	0.000885766	0.156467	Foralumab	0.156467		CAD				-1.04298	0.00253912	0.496544	Foralumab	0.496544		EEF2	1.10999	8.52919e-05	0.00808298	0.785569	0.016506	0.307172	both	0.00808298
STAT1				-0.936131	0.0010463	0.173953	Foralumab	0.173953		CCND3				-1.03685	0.00256612	0.496544	Foralumab	0.496544		HMGA1	1.21091	0.000100753	0.00944873	1.24851	0.00208208	0.0994618	both	0.00944873
L3MBTL2				-0.919335	0.00107618	0.175479	Foralumab	0.175479		LRIG1				1.07402	0.00282917	0.52256	Foralumab	0.52256		CBR1	-1.63143	0.000102059	0.00947253	-1.17285	0.0100159	0.236761	both	0.00947253
ZNF726				-0.974002	0.00126159	0.20183	Foralumab	0.20183		TMEM131L				-0.815476	0.00299437	0.540784	Foralumab	0.540784		CXCL16	1.08212	0.000106641	0.00969786	0.916573	0.0258955	0.371077	both	0.00969786
BTN3A3				-0.814668	0.00131746	0.203104	Foralumab	0.203104		METTL8				-0.984402	0.00332887	0.57391	Foralumab	0.57391		PHLDA1	1.34804	0.000109266	0.00983726	1.39968	0.000474968	0.038938	both	0.00983726
RBBP6				0.882614	0.00130319	0.203104	Foralumab	0.203104		NDRG3				-0.858895	0.00338965	0.57391	Foralumab	0.57391		ETV3	0.992175	0.00115776	0.0463259	1.35021	6.03459e-05	0.010111	both	0.010111
LRRC28				0.867831	0.00142551	0.212051	Foralumab	0.212051		R3HDM4				0.995522	0.00331426	0.57391	Foralumab	0.57391		MAMLD1	0.884289	0.0406602	0.362737	1.87845	5.94891e-05	0.010111	both	0.010111
TNIK				0.802087	0.00145514	0.212726	Foralumab	0.212726		CD72				-1.01784	0.00411521	0.655771	Foralumab	0.655771		FMNL3	1.5729	0.000113622	0.0101281	1.00291	0.0306936	0.399839	both	0.0101281
GOLGA8A				0.682055	0.00150289	0.215983	Foralumab	0.215983		TTC28				-1.01827	0.00407241	0.655771	Foralumab	0.655771		RPLP1	0.836288	0.000119956	0.010485	0.559069	0.0328222	0.4107	both	0.010485
CDK10				0.673952	0.00163178	0.230598	Foralumab	0.230598		MRPS23				0.908699	0.00426654	0.666811	Foralumab	0.666811		DNAJC13	-1.15693	0.00025486	0.0177869	-1.73754	6.98025e-05	0.0108342	both	0.0108342
ZNF395				0.917871	0.00176568	0.245429	Foralumab	0.245429		C15orf39				0.954334	0.00448895	0.688334	Foralumab	0.688334		OLR1	1.54528	0.000132121	0.0114374	1.47382	0.000811049	0.0563486	both	0.0114374
IKZF3				-0.651957	0.00192655	0.255238	Foralumab	0.255238		ATP2C1				-0.996452	0.00469396	0.706441	Foralumab	0.706441		CDCP1	1.48696	0.000147219	0.0123411	1.30914	0.00307869	0.124772	both	0.0123411
MTO1				-0.76071	0.00189709	0.255238	Foralumab	0.255238		MYO7B				-0.995155	0.00527952	0.78012	Foralumab	0.78012		CREM	1.28429	0.000148044	0.0123411	1.03711	0.0205204	0.3305	both	0.0123411
WDR59				0.785278	0.00187726	0.255238	Foralumab	0.255238		LARS1				-0.906312	0.0053987	0.783487	Foralumab	0.783487		MAP2K3	0.840295	0.000157054	0.0129721	0.612458	0.0181701	0.31635	both	0.0129721
NDEL1				0.835156	0.00203574	0.265555	Foralumab	0.265555		IL6ST				-0.96447	0.00580154	0.785819	Foralumab	0.785819		MARCHF1	-1.30986	0.000183999	0.0149727	-1.34129	0.00060185	0.044801	both	0.0149727
SP100				-0.789841	0.00224525	0.288447	Foralumab	0.288447		PIP4K2B				-0.938563	0.00554107	0.785819	Foralumab	0.785819		RPL5	1.05372	0.000194347	0.0152148	0.921626	0.0107347	0.24569	both	0.0152148
SF3B3				-0.737356	0.00267065	0.333007	Foralumab	0.333007		SMYD5				0.870234	0.00563819	0.785819	Foralumab	0.785819		RPLP0	0.974264	0.000197592	0.0153355	1.03468	0.00169295	0.0921645	both	0.0153355
CX3CR1				-0.899919	0.00280494	0.342221	Foralumab	0.342221		TAOK1				-0.93685	0.0057888	0.785819	Foralumab	0.785819		ZNF331	1.1265	0.000199355	0.0153401	1.36579	0.000340839	0.0318892	both	0.0153401
OASL				-0.899177	0.00282527	0.342221	Foralumab	0.342221		RDX				0.947377	0.00616509	0.795296	Foralumab	0.795296		EMD	0.893065	0.000204041	0.0154368	0.793797	0.0161319	0.304088	both	0.0154368
NOL8				-0.729575	0.00295228	0.352569	Foralumab	0.352569		LETMD1				-0.875011	0.00664022	0.843204	Foralumab	0.843204		RPS8	0.897369	0.000225914	0.0165358	0.846135	0.00419315	0.145864	both	0.0165358
PLSCR1				-0.901462	0.00312274	0.367746	Foralumab	0.367746		IGHV2-26				0.941374	0.00697731	0.846337	Foralumab	0.846337		MNDA	-1.40882	0.000230501	0.0167355	-1.42797	0.00115656	0.0723896	both	0.0167355
TAF2				-0.839976	0.00326618	0.379369	Foralumab	0.379369		PTPRE				0.954094	0.00686414	0.846337	Foralumab	0.846337		RAB7B	1.64648	0.000240704	0.0173364	1.50008	0.00142556	0.083118	both	0.0173364
CCT5				-0.722261	0.0035225	0.39823	Foralumab	0.39823		HEMK1				-0.940115	0.00716264	0.85604	Foralumab	0.85604		NADK	-1.00534	0.00120204	0.0474649	-1.44104	0.000127553	0.0178942	both	0.0178942
EEF1A1				0.505009	0.00349336	0.39823	Foralumab	0.39823		CCDC57				-0.918033	0.00786361	0.866335	Foralumab	0.866335		BLVRA	-1.06385	0.000266652	0.0183085	-1.17177	0.000475049	0.038938	both	0.0183085
UBE2L6				-0.768155	0.00374095	0.417362	Foralumab	0.417362		CIB1				0.787685	0.00779515	0.866335	Foralumab	0.866335		ATP13A3	1.35639	0.000268928	0.0183085	1.01152	0.00883863	0.223106	both	0.0183085
EIF4B				0.561781	0.00399272	0.434029	Foralumab	0.434029		CYB5A				-0.827922	0.00759054	0.866335	Foralumab	0.866335		IL1R1	1.33335	0.000275482	0.0185087	1.39423	0.00206302	0.0994618	both	0.0185087
NDUFS6				-0.863826	0.00430162	0.461689	Foralumab	0.461689		HLA-DOA				-0.796685	0.00778787	0.866335	Foralumab	0.866335		SQLE	1.1997	0.000284365	0.0188245	1.01082	0.02182	0.34166	both	0.0188245
IKZF4				-0.677755	0.00448552	0.467475	Foralumab	0.467475		INTS1				-0.938794	0.00788837	0.866335	Foralumab	0.866335		SLC7A5	1.13095	0.000287756	0.01891	1.1369	0.00510813	0.164158	both	0.01891
MARCHF8				0.781521	0.00443304	0.467475	Foralumab	0.467475		SEC14L1				0.679147	0.00752752	0.866335	Foralumab	0.866335		CD44	0.76772	0.0002963	0.0193304	0.79019	0.00651374	0.190834	both	0.0193304
SGCB				-0.869208	0.00452093	0.467475	Foralumab	0.467475		APOBEC3A				0.905366	0.00839045	0.887408	Foralumab	0.887408		TNFSF15	1.33272	0.000813514	0.0369903	1.72907	0.000152561	0.0202351	both	0.0202351
RNF14				-0.780048	0.00469718	0.479848	Foralumab	0.479848		BAG4				0.862611	0.00840783	0.887408	Foralumab	0.887408		FFAR2	-0.979816	0.000339486	0.0214421	-0.869175	0.00609077	0.181586	both	0.0214421
RECQL5				0.851549	0.00492435	0.497067	Foralumab	0.497067		TMEM134				0.693122	0.00875956	0.889862	Foralumab	0.889862		DDX58	-1.34425	0.000347911	0.0217517	-1.5626	0.000408719	0.0369591	both	0.0217517
ECSIT				0.813421	0.00546147	0.540696	Foralumab	0.540696		ZNF384				0.888038	0.00872982	0.889862	Foralumab	0.889862		DDIT4	0.879611	0.0179779	0.243197	1.64124	0.000179904	0.0222441	both	0.0222441
IFIT2				-0.846794	0.00548412	0.540696	Foralumab	0.540696		TSPAN31				-0.774349	0.00891674	0.894646	Foralumab	0.894646		SLC7A1	0.94736	0.0191325	0.250994	1.55486	0.000177431	0.0222441	both	0.0222441
AK2				-0.80779	0.00579128	0.543221	Foralumab	0.543221		ACAD10				-0.893782	0.0120151	0.895566	Foralumab	0.895566		RPS23	0.818368	0.000361492	0.0222912	0.626582	0.0259424	0.371077	both	0.0222912
CPNE3				-0.804978	0.00571244	0.543221	Foralumab	0.543221		AIFM2				0.848184	0.0098385	0.895566	Foralumab	0.895566		PIK3R5	0.756209	0.000373009	0.0228449	0.652333	0.04598	0.478055	both	0.0228449
DTX3L				-0.665798	0.00602227	0.543221	Foralumab	0.543221		AREG				-0.916354	0.0106101	0.895566	Foralumab	0.895566		LIF	1.52256	0.000376326	0.0228923	1.26859	0.00612568	0.181597	both	0.0228923
LYZ				0.6954	0.00590366	0.543221	Foralumab	0.543221		ATP10D				-0.890201	0.0118533	0.895566	Foralumab	0.895566		IFI16	-0.879528	0.0111523	0.19026	-1.39354	0.000192954	0.0230168	both	0.0230168
MRPS14				0.829459	0.00590317	0.543221	Foralumab	0.543221		ATP1A1				0.720249	0.0114813	0.895566	Foralumab	0.895566		FKBP5	-1.43735	0.000395682	0.0235398	-0.73123	0.0207177	0.332167	both	0.0235398
ORMDL2				-0.832852	0.00598068	0.543221	Foralumab	0.543221		CD69				-0.853114	0.00937718	0.895566	Foralumab	0.895566		GPRIN3	1.34245	0.0003968	0.0235398	1.00074	0.0246862	0.364362	both	0.0235398
ZNF81				0.680583	0.00600637	0.543221	Foralumab	0.543221		COQ8B				-0.920743	0.0102293	0.895566	Foralumab	0.895566		NAIP	-0.803073	0.00288889	0.0827618	-1.20484	0.000225532	0.0253117	both	0.0253117
NCBP3				0.80023	0.0061623	0.545383	Foralumab	0.545383		DDX1				-0.713581	0.00988678	0.895566	Foralumab	0.895566		MT2A	-1.32226	0.000441208	0.0254628	-1.30006	0.00230203	0.103662	both	0.0254628
ZNF33B				0.81028	0.0062392	0.545383	Foralumab	0.545383		F13A1				0.2444	0.0118478	0.895566	Foralumab	0.895566		CAMSAP1	1.29592	0.000458935	0.0261629	1.16279	0.00345245	0.133966	both	0.0261629
AAK1				0.422072	0.00706917	0.573158	Foralumab	0.573158		FAM177B				-0.881346	0.0122865	0.895566	Foralumab	0.895566		HSH2D	-1.15435	0.000460285	0.0261629	-1.18696	0.00213997	0.100434	both	0.0261629
CEP78				-0.739044	0.00695952	0.573158	Foralumab	0.573158		FBXO3				0.801521	0.0117789	0.895566	Foralumab	0.895566		RGL1	-1.50326	0.000469117	0.0262327	-0.964718	0.0292752	0.394756	both	0.0262327
EEF2				0.504009	0.00708718	0.573158	Foralumab	0.573158		FCRL1				-0.701847	0.011285	0.895566	Foralumab	0.895566		NHSL2	-0.933713	0.0031625	0.0870378	-1.48322	0.000249966	0.0268136	both	0.0268136
IRF7				-0.829832	0.00709773	0.573158	Foralumab	0.573158		HECTD4				-0.724219	0.0125624	0.895566	Foralumab	0.895566		FYB1	-1.15316	0.000517243	0.0287453	-1.21814	0.00193374	0.0993424	both	0.0287453
LAIR1				-0.737712	0.00695001	0.573158	Foralumab	0.573158		HLA-DOB				-0.699762	0.0110776	0.895566	Foralumab	0.895566		KANK1	0.972273	0.00785979	0.156444	1.67216	0.00028753	0.0292471	both	0.0292471
SAMD9L				-0.795458	0.00708669	0.573158	Foralumab	0.573158		IGLV5-45				0.417965	0.0124829	0.895566	Foralumab	0.895566		RGPD6	0.902048	0.0339804	0.332528	1.56456	0.000300689	0.0292471	both	0.0292471
VPS13A				-0.784848	0.0067807	0.573158	Foralumab	0.573158		MARCHF1				-0.78102	0.0114658	0.895566	Foralumab	0.895566		NDUFS2	-0.916687	0.000553471	0.0301994	-0.637738	0.0302801	0.398724	both	0.0301994
NPEPPS				0.767145	0.00725286	0.58016	Foralumab	0.58016		MARF1				0.607491	0.0115721	0.895566	Foralumab	0.895566		PLAUR	0.73446	0.0249794	0.284245	1.16179	0.000326595	0.0313489	both	0.0313489
CDHR4				-0.790125	0.00734328	0.581903	Foralumab	0.581903		NICN1				-0.886963	0.0120141	0.895566	Foralumab	0.895566		RPL3	0.919388	0.000587037	0.0314589	0.770797	0.0322354	0.40643	both	0.0314589
AKT3				0.780254	0.00766342	0.59071	Foralumab	0.59071		NR2C2				0.883452	0.010815	0.895566	Foralumab	0.895566		TYMP	-1.07689	0.000593571	0.0316208	-0.786858	0.0425662	0.459514	both	0.0316208
FRMD4A				0.58415	0.00752574	0.59071	Foralumab	0.59071		NSL1				-0.831345	0.010996	0.895566	Foralumab	0.895566		SLC39A8	1.40022	0.00062141	0.0325265	1.37206	0.00262406	0.111944	both	0.0325265
TNRC6C				0.719079	0.00760336	0.59071	Foralumab	0.59071		PLEKHG1				0.771445	0.0111247	0.895566	Foralumab	0.895566		POR	0.961905	0.000639429	0.0328696	0.949367	0.0160732	0.304088	both	0.0328696
SLFN13				-0.690909	0.00800424	0.605964	Foralumab	0.605964		PNPO				-0.825471	0.00904527	0.895566	Foralumab	0.895566		MS4A4A	-1.34817	0.000655703	0.0328696	-1.02393	0.0140996	0.283118	both	0.0328696
NELL2				0.562614	0.00813456	0.61038	Foralumab	0.61038		POLD4				-0.731059	0.0118998	0.895566	Foralumab	0.895566		EIF3L	1.0637	0.000656321	0.0328696	0.982692	0.0102026	0.239318	both	0.0328696
MAN2A2				0.595885	0.00867242	0.633909	Foralumab	0.633909		RFFL				0.840991	0.0103596	0.895566	Foralumab	0.895566		SP110	-1.23953	0.000661026	0.0328696	-1.26608	0.000957927	0.063528	both	0.0328696
PAPLN				-0.781893	0.00866034	0.633909	Foralumab	0.633909		SMAGP				-0.739254	0.00983338	0.895566	Foralumab	0.895566		CDK14	1.45982	0.000662164	0.0328696	1.04262	0.0224134	0.344891	both	0.0328696
FMN1				-0.61092	0.00877678	0.636054	Foralumab	0.636054		TUBA1A				-0.782728	0.00956759	0.895566	Foralumab	0.895566		LIPN	1.15273	0.000675833	0.0328696	1.20501	0.00901289	0.225942	both	0.0328696
CNTRL				-0.625054	0.0089557	0.637427	Foralumab	0.637427		ULBP3				-0.888124	0.0112077	0.895566	Foralumab	0.895566		PIK3CD	-1.02701	0.00070579	0.0339798	-0.630103	0.0456181	0.475406	both	0.0339798
PSME1				-0.463914	0.00909643	0.637427	Foralumab	0.637427		USP37				-0.878534	0.010095	0.895566	Foralumab	0.895566		BTG1	1.01754	0.000727356	0.0348318	1.11894	0.00056046	0.0430374	both	0.0348318
SPDYE2				-0.785117	0.00908863	0.637427	Foralumab	0.637427		ZFP91				0.779419	0.0121389	0.895566	Foralumab	0.895566		INSIG1	1.15942	0.000750977	0.0354922	1.0107	0.0183268	0.31681	both	0.0354922
ARHGEF2				-0.724314	0.00930056	0.643006	Foralumab	0.643006		ZNF585A				0.867619	0.0119872	0.895566	Foralumab	0.895566		RPS6	0.888194	0.000756916	0.0354922	0.756536	0.0128995	0.26821	both	0.0354922
CD47				0.686099	0.00946001	0.643006	Foralumab	0.643006		TMEM154				-0.803814	0.0128299	0.906684	Foralumab	0.906684		SEH1L	1.01383	0.000762964	0.0355905	0.823187	0.0471169	0.48291	both	0.0355905
IVD				-0.659629	0.0094794	0.643006	Foralumab	0.643006		CBWD2				-0.877166	0.0132472	0.915353	Foralumab	0.915353		OSM	1.13635	0.00221431	0.0709447	1.57416	0.000385521	0.0355997	both	0.0355997
SESN3				0.677364	0.00984554	0.662542	Foralumab	0.662542		KLHL5				0.80106	0.0132436	0.915353	Foralumab	0.915353		C15orf48	1.35834	0.00078396	0.0363814	1.06439	0.0190367	0.32357	both	0.0363814
NUP85				-0.691416	0.00995443	0.662935	Foralumab	0.662935		CTPS1				0.767163	0.0141489	0.942524	Foralumab	0.942524		APOL6	-1.10111	0.000791273	0.0365325	-0.927617	0.0154191	0.298938	both	0.0365325
INTS11				-0.585716	0.0101758	0.668841	Foralumab	0.668841		IGLV4-69				-0.710222	0.0138372	0.942524	Foralumab	0.942524		LMNA	0.9775	0.00583037	0.12834	1.26627	0.0004215	0.0369591	both	0.0369591
ARID2				0.672157	0.0104214	0.669418	Foralumab	0.669418		SPECC1L				-0.812595	0.0140227	0.942524	Foralumab	0.942524		MMP19	0.998155	0.0112932	0.190466	1.52909	0.000410684	0.0369591	both	0.0369591
RPL8				0.386034	0.0103979	0.669418	Foralumab	0.669418		ARHGEF18				-0.698575	0.0183844	0.942699	Foralumab	0.942699		TGFBI	1.05897	0.000862251	0.0386211	0.722886	0.0387381	0.441554	both	0.0386211
TGIF1				0.729631	0.0103303	0.669418	Foralumab	0.669418		BACH2				-0.704014	0.0150364	0.942699	Foralumab	0.942699		KDM6B	0.609059	0.0261685	0.290915	0.993557	0.000465648	0.038938	both	0.038938
SP110				-0.657718	0.0105192	0.670618	Foralumab	0.670618		CD53				-0.608497	0.0158869	0.942699	Foralumab	0.942699		GLRX	-1.18537	0.000883933	0.0393963	-0.895901	0.0316089	0.402058	both	0.0393963
SNRK				0.480175	0.0106326	0.672792	Foralumab	0.672792		CDC27				-0.69481	0.0168909	0.942699	Foralumab	0.942699		PPP1R15B	0.722152	0.00094615	0.0411507	0.665111	0.0313857	0.401681	both	0.0411507
SEC23IP				0.666548	0.0109112	0.680267	Foralumab	0.680267		CFAP221				0.774719	0.0181146	0.942699	Foralumab	0.942699		ITGAE	1.14998	0.000951529	0.0411856	0.857021	0.0251748	0.3673	both	0.0411856
ST8SIA4				-0.683953	0.0108645	0.680267	Foralumab	0.680267		CSNK1A1				0.544013	0.0192004	0.942699	Foralumab	0.942699		IFIT2	-0.859161	0.0337362	0.330857	-1.55018	0.000523496	0.0415098	both	0.0415098
SF1				0.710528	0.0110365	0.683057	Foralumab	0.683057		DMAC2L				0.818352	0.0146844	0.942699	Foralumab	0.942699		RPS4X	0.858295	0.00101667	0.0429722	0.806886	0.0117578	0.259029	both	0.0429722
ABCA5				0.750821	0.012154	0.709778	Foralumab	0.709778		ENDOD1				-0.823271	0.0169228	0.942699	Foralumab	0.942699		BORCS5	0.897234	0.0119916	0.197008	1.34772	0.000577997	0.0439217	both	0.0439217
AQP3				0.609579	0.0126332	0.709778	Foralumab	0.709778		ENOSF1				-0.819442	0.0193508	0.942699	Foralumab	0.942699		PTGES	1.19112	0.00104471	0.0439508	1.10135	0.008023	0.21597	both	0.0439508
CRTAM				-0.730128	0.0119492	0.709778	Foralumab	0.709778		ERCC6				0.809417	0.0172214	0.942699	Foralumab	0.942699		COA3	-0.854206	0.0259479	0.28912	-1.41044	0.000588719	0.0442753	both	0.0442753
EIF3E				0.438158	0.011928	0.709778	Foralumab	0.709778		FCRL2				-0.691759	0.0191901	0.942699	Foralumab	0.942699		RPL10	0.837581	0.00106027	0.0443981	0.705877	0.0245248	0.364362	both	0.0443981
FGR				-0.745487	0.0126402	0.709778	Foralumab	0.709778		GORASP1				-0.852085	0.0167291	0.942699	Foralumab	0.942699		FABP5	1.45736	0.00110781	0.0458036	0.920015	0.0476252	0.483781	both	0.0458036
KNTC1				0.618459	0.0124356	0.709778	Foralumab	0.709778		HSPG2				-0.778142	0.0155838	0.942699	Foralumab	0.942699		CCND3	-1.21636	0.00111287	0.0458036	-0.8123	0.0298136	0.396722	both	0.0458036
MED24				-0.627704	0.0126145	0.709778	Foralumab	0.709778		IGHV3-13				0.599752	0.0190546	0.942699	Foralumab	0.942699		TRIM34	-1.17407	0.00111954	0.0458036	-0.960859	0.0308238	0.399925	both	0.0458036
PIP4K2C				-0.66976	0.0121101	0.709778	Foralumab	0.709778		INTS3				-0.728302	0.0152753	0.942699	Foralumab	0.942699		GBP1	-0.923771	0.0164033	0.23111	-1.44596	0.000622123	0.0458423	both	0.0458423
RAB29				-0.597788	0.0119819	0.709778	Foralumab	0.709778		KMO				-0.86686	0.0146494	0.942699	Foralumab	0.942699		TAP1	-1.02383	0.00115701	0.0463259	-1.08392	0.00406087	0.14572	both	0.0463259
RPS5				0.511103	0.0122212	0.709778	Foralumab	0.709778		LNPEP				-0.620642	0.0193076	0.942699	Foralumab	0.942699		RNASE2	-1.21287	0.00116964	0.0465939	-1.13652	0.00795848	0.215826	both	0.0465939
SLC25A3				0.366318	0.0123561	0.709778	Foralumab	0.709778		LTK				0.861351	0.0167546	0.942699	Foralumab	0.942699		MGAM	1.119	0.0114637	0.192221	1.52266	0.000639519	0.0466529	both	0.0466529
TMEM8B				0.733597	0.0116591	0.709778	Foralumab	0.709778		NIBAN3				-0.6477	0.0178418	0.942699	Foralumab	0.942699		G0S2	1.03207	0.00118307	0.0469215	1.10558	0.000652059	0.0470967	both	0.0469215
ERAP1				-0.57482	0.0127717	0.712444	Foralumab	0.712444		NKAPD1				0.846773	0.0163024	0.942699	Foralumab	0.942699		TUBA1A	-1.06252	0.00121094	0.0476074	-0.99227	0.00859161	0.220853	both	0.0476074
MTPAP				-0.554918	0.0135189	0.725154	Foralumab	0.725154		PGAP2				-0.72867	0.0174383	0.942699	Foralumab	0.942699		SREK1	0.891665	0.00121785	0.047671	0.62014	0.0379423	0.436468	both	0.047671
RPAP1				0.67298	0.0135982	0.725154	Foralumab	0.725154		PLEKHA2				-0.703745	0.0169138	0.942699	Foralumab	0.942699		UBE2L6	-1.03003	0.00421706	0.10539	-1.20387	0.000727022	0.0514915	both	0.0514915
RPS27A				0.437755	0.0134968	0.725154	Foralumab	0.725154		POGZ				0.834301	0.0171177	0.942699	Foralumab	0.942699		HLA-DRA	0.903641	0.00135173	0.0524089	0.712084	0.0184294	0.31783	both	0.0524089
SNAP23				0.581609	0.0134323	0.725154	Foralumab	0.725154		POLD2				-0.739141	0.017877	0.942699	Foralumab	0.942699		SLC4A7	1.29015	0.00140125	0.0527842	1.01187	0.0132312	0.27266	both	0.0527842
TAP1				-0.573249	0.0138306	0.729716	Foralumab	0.729716		PRPF39				0.681934	0.0179809	0.942699	Foralumab	0.942699		NMI	-1.17342	0.00142389	0.0532318	-1.13188	0.00857378	0.220853	both	0.0532318
TP53BP1				0.655754	0.0138559	0.729716	Foralumab	0.729716		PTPN4				0.817533	0.0183417	0.942699	Foralumab	0.942699		RFLNB	1.21675	0.00142496	0.0532318	1.01236	0.0168996	0.308206	both	0.0532318
APOL2				-0.591828	0.0148548	0.742661	Foralumab	0.742661		PTPRA				0.852794	0.0157563	0.942699	Foralumab	0.942699		ENG	1.17336	0.00145557	0.0537068	1.22008	0.00432741	0.147635	both	0.0537068
CASP1				-0.67314	0.0152282	0.742661	Foralumab	0.742661		RABL2B				-0.630822	0.015329	0.942699	Foralumab	0.942699		CDC37	0.70053	0.00146373	0.0537311	0.723985	0.0109007	0.248503	both	0.0537311
GIMAP4				-0.663687	0.0158535	0.742661	Foralumab	0.742661		RNPEPL1				0.694167	0.0178413	0.942699	Foralumab	0.942699		MKKS	1.33144	0.00153804	0.0551258	0.965074	0.0271797	0.382772	both	0.0551258
GPR89A				-0.679982	0.0158399	0.742661	Foralumab	0.742661		SCIMP				-0.747997	0.0193713	0.942699	Foralumab	0.942699		MOV10	-1.04748	0.00154913	0.0551258	-1.0693	0.00762065	0.210578	both	0.0551258
HEATR5A				0.701246	0.0151176	0.742661	Foralumab	0.742661		SEC23IP				0.765476	0.0169569	0.942699	Foralumab	0.942699		MARCKSL1	0.969034	0.00157545	0.0558418	0.863222	0.0128719	0.26821	both	0.0558418
M6PR				-0.679734	0.0149189	0.742661	Foralumab	0.742661		SLC44A2				-0.615532	0.0172659	0.942699	Foralumab	0.942699		SMS	1.04427	0.00162694	0.0574406	1.12924	0.00922872	0.228178	both	0.0574406
NEMP1				-0.720243	0.0155694	0.742661	Foralumab	0.742661		SPOCK2				0.770765	0.0170221	0.942699	Foralumab	0.942699		TLR7	-1.2229	0.00164234	0.0577577	-1.10133	0.0119658	0.260569	both	0.0577577
NMI				-0.723181	0.0151958	0.742661	Foralumab	0.742661		TRIOBP				0.839387	0.015524	0.942699	Foralumab	0.942699		STARD5	1.17029	0.00167177	0.0581334	1.00281	0.020485	0.3305	both	0.0581334
PDP1				0.693605	0.0151227	0.742661	Foralumab	0.742661		UTP18				0.7114	0.0186152	0.942699	Foralumab	0.942699		ISG20	-1.16585	0.00169744	0.0587772	-1.2738	0.00329702	0.130716	both	0.0587772
RAB3GAP2				0.698286	0.0157726	0.742661	Foralumab	0.742661		UTRN				-0.619418	0.0190771	0.942699	Foralumab	0.942699		ICAM1	0.470738	0.0418459	0.366728	0.973301	0.000864319	0.0589272	both	0.0589272
RNF10				-0.68422	0.0154542	0.742661	Foralumab	0.742661		VOPP1				0.648944	0.0165575	0.942699	Foralumab	0.942699		RPL9	0.804858	0.00178486	0.0610992	0.61321	0.047976	0.485416	both	0.0610992
RPAP3				-0.72238	0.0146241	0.742661	Foralumab	0.742661		VPS11				0.775256	0.0160976	0.942699	Foralumab	0.942699		DOT1L	1.20079	0.00199998	0.0666881	1.29344	0.00363018	0.137213	both	0.0666881
RPL10				0.409816	0.0154108	0.742661	Foralumab	0.742661		ZNF207				0.543194	0.0183277	0.942699	Foralumab	0.942699		ATP2B1	0.818964	0.00498652	0.117523	1.03758	0.00102394	0.0672939	both	0.0672939
RPL5				0.455241	0.015439	0.742661	Foralumab	0.742661		ZNF335				0.632861	0.019305	0.942699	Foralumab	0.942699		DDB2	-1.20312	0.00204387	0.0673149	-1.03935	0.00849896	0.220853	both	0.0673149
RPS11				0.356612	0.0144126	0.742661	Foralumab	0.742661		ZUP1				0.846296	0.0159958	0.942699	Foralumab	0.942699		PNP	0.892913	0.00204647	0.0673149	1.23152	0.00128236	0.0760557	both	0.0673149
RPS23				0.401059	0.0142671	0.742661	Foralumab	0.742661		TTC19				-0.727439	0.0197951	0.957589	Foralumab	0.957589		RPL6	0.87816	0.00218379	0.0702165	0.700416	0.0331253	0.413783	both	0.0702165
SNX14				0.706229	0.0156845	0.742661	Foralumab	0.742661		AFF3				-0.641541	0.0219379	0.971522	Foralumab	0.971522		CXCR4	1.07411	0.00229302	0.0724354	1.12159	0.0117411	0.259029	both	0.0724354
TTBK2				0.710554	0.0151233	0.742661	Foralumab	0.742661		CCDC12				0.624179	0.0221092	0.971522	Foralumab	0.971522		PSMB9	-0.908363	0.00514904	0.119169	-1.24959	0.00117521	0.0726538	both	0.0726538
ZBTB37				0.689987	0.0150091	0.742661	Foralumab	0.742661		CHI3L2				-0.825455	0.0204593	0.971522	Foralumab	0.971522		PABPC1	0.643701	0.00235874	0.0739922	0.646278	0.0173076	0.310292	both	0.0739922
KLF10				-0.670274	0.0160591	0.744071	Foralumab	0.744071		FKBP5				-0.789657	0.0221154	0.971522	Foralumab	0.971522		QSOX1	0.728792	0.0328417	0.327073	1.1849	0.00124423	0.0750137	both	0.0750137
PLEK				-0.708751	0.0160567	0.744071	Foralumab	0.744071		IGKV3-15				0.818378	0.0218487	0.971522	Foralumab	0.971522		SLC43A2	0.535572	0.0469844	0.389364	0.858969	0.00123934	0.0750137	both	0.0750137
APOL6				-0.455694	0.0167515	0.745881	Foralumab	0.745881		LRRC14				-0.819406	0.0216847	0.971522	Foralumab	0.971522		FGD3	-0.622767	0.0426805	0.369474	-0.980682	0.00125471	0.0750257	both	0.0750257
BTN2A1				-0.647834	0.016659	0.745881	Foralumab	0.745881		PLAAT4				0.790353	0.0218826	0.971522	Foralumab	0.971522		ITGB1	0.780763	0.00243671	0.0752015	1.13977	0.0028713	0.119692	both	0.0752015
FILIP1L				0.72064	0.0171731	0.745881	Foralumab	0.745881		PRKRIP1				0.774996	0.0212918	0.971522	Foralumab	0.971522		GBP5	-1.22095	0.0024929	0.07608	-1.28563	0.00395705	0.143813	both	0.07608
GRIPAP1				-0.58758	0.0166367	0.745881	Foralumab	0.745881		RABGAP1				0.81087	0.0207128	0.971522	Foralumab	0.971522		ITGAX	0.893069	0.002528	0.0763743	0.852166	0.0192791	0.324806	both	0.0763743
HS3ST3B1				0.66361	0.0171493	0.745881	Foralumab	0.745881		RERE				-0.805811	0.0217348	0.971522	Foralumab	0.971522		EEF1A1	0.860339	0.00263965	0.0784317	0.826379	0.020611	0.331183	both	0.0784317
NCAPD2				-0.648093	0.0163442	0.745881	Foralumab	0.745881		SMC1A				-0.747809	0.0203054	0.971522	Foralumab	0.971522		JARID2	1.05437	0.00276702	0.0806198	0.97355	0.0226533	0.345724	both	0.0806198
NDST2				0.705756	0.0172204	0.745881	Foralumab	0.745881		STARD5				-0.814997	0.0215904	0.971522	Foralumab	0.971522		SLC2A3	1.03435	0.00280867	0.0808517	0.728579	0.0260827	0.371627	both	0.0808517
PDCD6IP				-0.583149	0.0171036	0.745881	Foralumab	0.745881		STIMATE				-0.784738	0.0214976	0.971522	Foralumab	0.971522		GEM	1.06382	0.0119394	0.196868	1.46528	0.00148624	0.083118	both	0.083118
RPL9				0.467144	0.0168543	0.745881	Foralumab	0.745881		SYNE2				-0.716522	0.0216304	0.971522	Foralumab	0.971522		PTMA	0.46707	0.0029702	0.0838129	0.558812	0.0161169	0.304088	both	0.0838129
SREBF1				0.610673	0.0167446	0.745881	Foralumab	0.745881		TAB2				0.722716	0.0211519	0.971522	Foralumab	0.971522		SNX8	0.95872	0.00309965	0.08613	0.928451	0.0286968	0.391296	both	0.08613
TXNDC11				-0.681365	0.0172417	0.745881	Foralumab	0.745881		VPS50				-0.783737	0.0203334	0.971522	Foralumab	0.971522		BCAT1	1.08739	0.00311933	0.0863072	1.0686	0.0177972	0.312845	both	0.0863072
ARID1A				0.527656	0.0174298	0.750189	Foralumab	0.750189		DVL3				-0.810995	0.0227358	0.971733	Foralumab	0.971733		STAT1	-1.0749	0.00321999	0.0879155	-1.28823	0.0019168	0.0993424	both	0.0879155
RPS4X				0.468956	0.0175344	0.750878	Foralumab	0.750878		HIF1AN				0.698237	0.0227067	0.971733	Foralumab	0.971733		RPL13	0.737841	0.00328838	0.0891281	0.610981	0.0258454	0.371077	both	0.0891281
BPTF				0.580012	0.0183005	0.755916	Foralumab	0.755916		ITPR1				-0.480276	0.0227315	0.971733	Foralumab	0.971733		GPAT3	1.18293	0.00329399	0.0891281	0.930303	0.0221913	0.34332	both	0.0891281
DDA1				0.67592	0.0187218	0.755916	Foralumab	0.755916		SMAD7				0.8049	0.0228376	0.971733	Foralumab	0.971733		GPR84	0.955787	0.00329664	0.0891281	1.19013	0.00390314	0.143083	both	0.0891281
EIF3L				0.526112	0.0185071	0.755916	Foralumab	0.755916		TREML2				-0.82157	0.022585	0.971733	Foralumab	0.971733		PML	-1.07752	0.00360048	0.0948192	-1.17692	0.00303023	0.123494	both	0.0948192
MXD4				-0.704663	0.0183789	0.755916	Foralumab	0.755916		COX10				-0.689368	0.0232227	0.97788	Foralumab	0.97788		RPS27A	0.792065	0.00361246	0.0948192	0.671009	0.018266	0.316554	both	0.0948192
PGBD2				0.725596	0.0180731	0.755916	Foralumab	0.755916		USP6NL				-0.599939	0.0231247	0.97788	Foralumab	0.97788		VAMP5	-0.678052	0.0317731	0.322758	-1.16902	0.00178882	0.0952515	both	0.0952515
PHAF1				0.700485	0.0180198	0.755916	Foralumab	0.755916		SRSF4				0.588528	0.0234124	0.980786	Foralumab	0.980786		MAT2A	0.828816	0.00367252	0.0961154	0.821297	0.0050715	0.163702	both	0.0961154
RANBP10				-0.721133	0.0185159	0.755916	Foralumab	0.755916		IGLV6-57				0.645471	0.0244915	0.981611	Foralumab	0.981611		REST	0.941309	0.00370151	0.0963141	1.00143	0.00252718	0.109087	both	0.0963141
SLC20A1				0.468449	0.0185994	0.755916	Foralumab	0.755916		RAD18				-0.773393	0.0242661	0.981611	Foralumab	0.981611		PDLIM7	0.988873	0.00371953	0.0964053	0.934947	0.0248397	0.364362	both	0.0964053
TRAT1				-0.587471	0.0186882	0.755916	Foralumab	0.755916		S100A10				0.729891	0.0239634	0.981611	Foralumab	0.981611		SOD2	0.794797	0.00372643	0.0964053	1.05475	0.00299811	0.122907	both	0.0964053
TTLL4				0.680436	0.018516	0.755916	Foralumab	0.755916		SGMS1				-0.781748	0.0238248	0.981611	Foralumab	0.981611		HEG1	-0.967802	0.00388898	0.0994673	-1.25134	0.00209967	0.0994618	both	0.0994618
USP3				0.43416	0.0181535	0.755916	Foralumab	0.755916		TAF1D				0.539441	0.0243118	0.981611	Foralumab	0.981611		CCDC88C	-1.07789	0.00654526	0.13942	-1.31585	0.00199814	0.0994618	both	0.0994618
ATP8A1				0.645396	0.0189398	0.757502	Foralumab	0.757502		TMEM94				-0.704003	0.0239998	0.981611	Foralumab	0.981611		HVCN1	-1.10973	0.00659214	0.13942	-1.42264	0.00208443	0.0994618	both	0.0994618
PER1				0.58891	0.0189189	0.757502	Foralumab	0.757502		VIM				0.579844	0.0241799	0.981611	Foralumab	0.981611		TMEM273	0.883074	0.0219904	0.271205	1.3841	0.00208842	0.0994618	both	0.0994618
BBS2				0.595661	0.0200019	0.769736	Foralumab	0.769736		ZDHHC3				0.733385	0.0240972	0.981611	Foralumab	0.981611		ANGPTL4	0.871152	0.0371572	0.350256	1.44822	0.00199866	0.0994618	both	0.0994618
CCL4				-0.670973	0.0194361	0.769736	Foralumab	0.769736		IGHMBP2				-0.797937	0.0249385	0.98771	Foralumab	0.98771		EEF1G	0.843562	0.00394948	0.100402	0.768999	0.0188028	0.321726	both	0.100402
CD38				-0.698693	0.0200627	0.769736	Foralumab	0.769736		SKIL				0.784868	0.0251576	0.98771	Foralumab	0.98771		RPL4	0.929113	0.00395899	0.100402	0.872717	0.0171741	0.310292	both	0.100402
CIZ1				0.640102	0.0200358	0.769736	Foralumab	0.769736		SLC46A3				-0.788327	0.0248219	0.98771	Foralumab	0.98771		CCL4	0.874761	0.0121557	0.19813	1.3936	0.00220173	0.101028	both	0.101028
FHOD1				0.700036	0.0195511	0.769736	Foralumab	0.769736		ZNF559				-0.716355	0.0251014	0.98771	Foralumab	0.98771		NT5C3A	-1.13668	0.00409765	0.103627	-1.07087	0.0167511	0.307797	both	0.103627
GOLM1				0.634194	0.0196225	0.769736	Foralumab	0.769736		ACAP1				-0.5148	0.0483253	0.999641	Foralumab	0.999641		HBS1L	0.925217	0.014142	0.214116	1.10793	0.00236096	0.105664	both	0.105664
KLRD1				-0.614894	0.0197129	0.769736	Foralumab	0.769736		ACAP2				0.627624	0.0374333	0.999641	Foralumab	0.999641		GRK3	-0.921095	0.00432752	0.107226	-0.722668	0.034135	0.419217	both	0.107226
PRR5L				0.696517	0.0199706	0.769736	Foralumab	0.769736		ACSL3				-0.775115	0.0289321	0.999641	Foralumab	0.999641		MEGF9	-1.01667	0.00447317	0.109435	-1.09434	0.0112155	0.253303	both	0.109435
SRP19				-0.477133	0.0194742	0.769736	Foralumab	0.769736		ADARB1				-0.683564	0.0450291	0.999641	Foralumab	0.999641		RPS24	0.634417	0.00458001	0.111142	0.534805	0.0327159	0.410073	both	0.111142
PHB				-0.625417	0.0201724	0.770107	Foralumab	0.770107		ADPRM				-0.721446	0.0420072	0.999641	Foralumab	0.999641		TRAF1	1.05434	0.00464275	0.111827	0.991611	0.01262	0.267753	both	0.111827
RPL29				0.415837	0.020254	0.770107	Foralumab	0.770107		AK9				-0.744704	0.037455	0.999641	Foralumab	0.999641		CD93	0.899703	0.00471919	0.112399	0.859839	0.0359606	0.427252	both	0.112399
RAB11A				-0.616634	0.0203974	0.772097	Foralumab	0.772097		ALKBH4				0.743054	0.0386296	0.999641	Foralumab	0.999641		RPL10A	0.796814	0.00476608	0.113216	0.760254	0.0273315	0.383664	both	0.113216
RTEL1				-0.703799	0.0206238	0.777197	Foralumab	0.777197		ANAPC16				-0.497088	0.0332609	0.999641	Foralumab	0.999641		LARP4B	-0.681851	0.0261736	0.290915	-1.07773	0.00268582	0.113255	both	0.113255
MOV10				-0.563115	0.0208928	0.783849	Foralumab	0.783849		ANKRD46				-0.77879	0.029262	0.999641	Foralumab	0.999641		RPL22	0.654518	0.00504057	0.118178	0.671099	0.0224569	0.344891	both	0.118178
ERI3				-0.703992	0.0211207	0.788909	Foralumab	0.788909		AQR				0.707845	0.0423853	0.999641	Foralumab	0.999641		ANPEP	0.916626	0.00511233	0.118729	0.900513	0.0180594	0.315932	both	0.118729
RPL7A				0.334848	0.0212521	0.790334	Foralumab	0.790334		ARHGEF2				-0.628514	0.0410585	0.999641	Foralumab	0.999641		TREM1	0.900836	0.00540394	0.123169	0.880291	0.0254969	0.370518	both	0.123169
CFAP44				0.611994	0.0219179	0.811536	Foralumab	0.811536		ARID5A				0.692526	0.0312744	0.999641	Foralumab	0.999641		MAP3K1	-0.69029	0.00543309	0.12352	-0.9673	0.0113828	0.254717	both	0.12352
PRF1				-0.565576	0.0222422	0.818022	Foralumab	0.818022		ARL4C				0.662347	0.0409704	0.999641	Foralumab	0.999641		GABARAPL1	0.829977	0.00545779	0.123769	0.886054	0.0112665	0.253336	both	0.123769
RNF2				0.627276	0.022286	0.818022	Foralumab	0.818022		ATMIN				0.717538	0.0407836	0.999641	Foralumab	0.999641		MRAS	1.04679	0.00575794	0.127345	0.976731	0.012626	0.267753	both	0.127345
CHMP5				-0.664723	0.0225656	0.818177	Foralumab	0.818177		ATP6V1E1				0.550716	0.0488958	0.999641	Foralumab	0.999641		SMOX	1.18078	0.00658072	0.13942	1.35648	0.00323422	0.129635	both	0.129635
TNFAIP3				0.491918	0.022531	0.818177	Foralumab	0.818177		ATP8B1				-0.674343	0.0447126	0.999641	Foralumab	0.999641		ADGRE2	0.754405	0.00597699	0.130927	0.589358	0.017343	0.310292	both	0.130927
TRIM21				-0.630512	0.0225797	0.818177	Foralumab	0.818177		BCAT2				-0.687648	0.0444352	0.999641	Foralumab	0.999641		MLX	-0.631457	0.0473941	0.389638	-0.902625	0.00352543	0.135358	both	0.135358
CCDC85C				-0.673738	0.0231678	0.828279	Foralumab	0.828279		BCKDHB				-0.651461	0.0494186	0.999641	Foralumab	0.999641		APOL2	-0.860734	0.0252357	0.284352	-1.15076	0.00355398	0.13574	both	0.13574
NRIP1				0.599135	0.0232669	0.828279	Foralumab	0.828279		BEX4				-0.681801	0.0477497	0.999641	Foralumab	0.999641		LAP3	-1.02146	0.00629274	0.135747	-0.80968	0.036184	0.429207	both	0.135747
RPS8				0.489808	0.022965	0.828279	Foralumab	0.828279		BLMH				0.742895	0.0357837	0.999641	Foralumab	0.999641		TPM4	0.806363	0.00658921	0.13942	0.912862	0.0209608	0.33505	both	0.13942
REEP5				-0.561761	0.0236416	0.835237	Foralumab	0.835237		BMP2K				-0.77407	0.0285745	0.999641	Foralumab	0.999641		MOAP1	0.599075	0.0216158	0.26818	1.24864	0.0038106	0.141108	both	0.141108
UBR7				-0.656807	0.0238948	0.84068	Foralumab	0.84068		BTLA				-0.716247	0.0296584	0.999641	Foralumab	0.999641		MAP3K8	0.74231	0.00688816	0.142234	0.929643	0.0192394	0.324806	both	0.142234
CLSTN3				-0.674975	0.0247147	0.847093	Foralumab	0.847093		CASP1				-0.757282	0.0357439	0.999641	Foralumab	0.999641		APOBEC3C	-0.59386	0.00694612	0.142776	-0.662146	0.0123072	0.264909	both	0.142776
EFL1				-0.67014	0.0245118	0.847093	Foralumab	0.847093		CCDC43				0.738068	0.0373846	0.999641	Foralumab	0.999641		RPSA	0.670998	0.00698869	0.142998	0.672762	0.0181524	0.31635	both	0.142998
ERMN				0.646611	0.0248763	0.847093	Foralumab	0.847093		CD24				-0.69195	0.0402485	0.999641	Foralumab	0.999641		ADAM19	1.12886	0.00715303	0.145369	1.2364	0.00717481	0.200537	both	0.145369
SCARB2				-0.658308	0.0244045	0.847093	Foralumab	0.847093		CDK17				0.66296	0.043464	0.999641	Foralumab	0.999641		PIK3C2A	0.841861	0.0163757	0.231082	-1.00663	0.00409494	0.14572	both	0.14572
SLC16A7				0.613591	0.0248394	0.847093	Foralumab	0.847093		CDKN1A				0.681144	0.0472612	0.999641	Foralumab	0.999641		SELPLG	-0.855467	0.00720411	0.146078	-0.916385	0.0198659	0.328863	both	0.146078
SLC1A2				0.679602	0.024716	0.847093	Foralumab	0.847093		CEP120				-0.705549	0.0397003	0.999641	Foralumab	0.999641		TUBB6	0.813797	0.0114653	0.192221	0.861246	0.00425832	0.14653	both	0.14653
TMSB4X				-0.332817	0.024354	0.847093	Foralumab	0.847093		CERS5				-0.622721	0.0295514	0.999641	Foralumab	0.999641		RPL7	0.811163	0.00788908	0.156444	0.826325	0.0106201	0.244397	both	0.156444
ZNF148				0.617877	0.0244837	0.847093	Foralumab	0.847093		CHST15				0.694822	0.0420684	0.999641	Foralumab	0.999641		SLC11A1	0.654203	0.00801647	0.157926	0.714891	0.0356832	0.425477	both	0.157926
PIK3IP1				0.414765	0.0250742	0.850417	Foralumab	0.850417		CPEB4				0.757912	0.0275346	0.999641	Foralumab	0.999641		FTH1	0.703307	0.00812103	0.159637	0.765115	0.0297467	0.396714	both	0.159637
APOBEC3G				-0.587236	0.0261499	0.853364	Foralumab	0.853364		CPT1B				-0.687138	0.0455487	0.999641	Foralumab	0.999641		SRGN	0.792925	0.00821273	0.160737	0.814742	0.0305705	0.398948	both	0.160737
CCDC198				0.656564	0.0265593	0.853364	Foralumab	0.853364		CR2				-0.715457	0.0453887	0.999641	Foralumab	0.999641		CCL7	1.11462	0.00852329	0.163643	0.765513	0.0163671	0.306149	both	0.163643
DEPDC5				-0.604082	0.0255852	0.853364	Foralumab	0.853364		CSTF3				-0.753188	0.0337676	0.999641	Foralumab	0.999641		SHFL	-0.831042	0.0105263	0.187207	-1.03521	0.00531006	0.167688	both	0.167688
HAUS7				-0.685348	0.0263229	0.853364	Foralumab	0.853364		CYB561D1				-0.741845	0.0334114	0.999641	Foralumab	0.999641		PARP12	-0.950483	0.0159327	0.229116	-1.23279	0.00535591	0.167688	both	0.167688
HIVEP1				-0.52475	0.0262865	0.853364	Foralumab	0.853364		DENND2D				-0.701506	0.029423	0.999641	Foralumab	0.999641		MFSD2A	0.918319	0.0169039	0.233413	1.05502	0.00534137	0.167688	both	0.167688
NDUFAF5				0.653443	0.0268368	0.853364	Foralumab	0.853364		DHX38				0.598529	0.0333038	0.999641	Foralumab	0.999641		SPHK1	0.98018	0.00893805	0.170125	1.05443	0.00932179	0.228178	both	0.170125
NUP93				-0.619163	0.026859	0.853364	Foralumab	0.853364		DKC1				0.627375	0.0324605	0.999641	Foralumab	0.999641		RPS16	0.633762	0.0089679	0.170333	0.629482	0.0248661	0.364362	both	0.170333
PARP14				-0.574537	0.0267259	0.853364	Foralumab	0.853364		DNAJC1				0.738693	0.0357656	0.999641	Foralumab	0.999641		ZNF697	1.11914	0.00967455	0.17885	1.24545	0.00570983	0.175127	both	0.175127
PDE4D				0.615339	0.0254121	0.853364	Foralumab	0.853364		DNAJC19				-0.638769	0.0495733	0.999641	Foralumab	0.999641		PLAU	0.969266	0.00947397	0.176228	1.23642	0.00791595	0.215826	both	0.176228
POGLUT3				-0.680706	0.0268579	0.853364	Foralumab	0.853364		DUSP16				0.744486	0.0372651	0.999641	Foralumab	0.999641		SP140	-0.851798	0.0239316	0.283122	-1.26771	0.00582522	0.177062	both	0.177062
RALBP1				-0.652276	0.0270603	0.853364	Foralumab	0.853364		EGR1				-0.762103	0.0317347	0.999641	Foralumab	0.999641		REC8	-0.788591	0.0135521	0.209999	-0.89016	0.00594573	0.179976	both	0.179976
RPL17				0.393871	0.0270734	0.853364	Foralumab	0.853364		ENDOV				0.767575	0.028597	0.999641	Foralumab	0.999641		MITF	1.03927	0.00994512	0.182971	0.968689	0.0406186	0.450155	both	0.182971
RREB1				0.625849	0.0261709	0.853364	Foralumab	0.853364		ERAL1				0.699587	0.0281624	0.999641	Foralumab	0.999641		HLA-DPB1	0.670043	0.00996475	0.182971	0.673157	0.00871513	0.221281	both	0.182971
SEC31A				0.517492	0.0266422	0.853364	Foralumab	0.853364		ETFBKMT				-0.702343	0.0337595	0.999641	Foralumab	0.999641		NAGK	-0.848439	0.00997873	0.182971	-0.929827	0.0124558	0.266466	both	0.182971
STX7				-0.656853	0.0268132	0.853364	Foralumab	0.853364		EXOC5				-0.682511	0.0378982	0.999641	Foralumab	0.999641		BTG3	0.881579	0.0103903	0.186673	1.02472	0.0104965	0.243085	both	0.186673
TRGC2				-0.588576	0.0269042	0.853364	Foralumab	0.853364		FAM83G				0.702067	0.0458948	0.999641	Foralumab	0.999641		GSTO1	0.838232	0.0107196	0.18776	0.862458	0.0396614	0.446497	both	0.18776
TRIM25				-0.596583	0.0255617	0.853364	Foralumab	0.853364		FBXO33				-0.770812	0.028562	0.999641	Foralumab	0.999641		JAG1	1.08359	0.011071	0.19026	1.16119	0.00914389	0.227305	both	0.19026
WIPF2				-0.652106	0.0258238	0.853364	Foralumab	0.853364		FBXW7				0.646027	0.0426608	0.999641	Foralumab	0.999641		FGFR1	0.987344	0.0112893	0.190466	1.05871	0.021825	0.34166	both	0.190466
ZC3H14				0.599121	0.0258445	0.853364	Foralumab	0.853364		FCER2				-0.541814	0.0334186	0.999641	Foralumab	0.999641		GPR183	0.763271	0.0113034	0.190466	0.771434	0.0343899	0.420171	both	0.190466
COX4I1				0.342006	0.0274183	0.857858	Foralumab	0.857858		FCRL3				-0.738982	0.0334147	0.999641	Foralumab	0.999641		CD83	0.603924	0.0188393	0.248858	0.727604	0.00681138	0.192593	both	0.192593
ATP6V0B				-0.539142	0.0278514	0.865801	Foralumab	0.865801		FCRLA				-0.652303	0.0450282	0.999641	Foralumab	0.999641		EIF4E	0.69178	0.0115518	0.192952	0.86328	0.0168336	0.307797	both	0.192952
NSL1				-0.648454	0.0279785	0.865801	Foralumab	0.865801		FLI1				-0.699857	0.0388641	0.999641	Foralumab	0.999641		MTHFR	-0.775094	0.0117411	0.195029	-0.834536	0.0138738	0.280359	both	0.195029
PABPN1				0.653188	0.0279058	0.865801	Foralumab	0.865801		FMNL1				0.586002	0.0497838	0.999641	Foralumab	0.999641		ABI3	-0.877512	0.0203556	0.258634	-1.19354	0.00695847	0.195992	both	0.195992
SC5D				0.62941	0.0281876	0.8691	Foralumab	0.8691		FMNL3				0.723802	0.0426775	0.999641	Foralumab	0.999641		WDR1	0.527637	0.0120157	0.197044	0.731534	0.0373122	0.434249	both	0.197044
SIL1				0.657717	0.0283965	0.872368	Foralumab	0.872368		FTSJ3				0.677785	0.0284969	0.999641	Foralumab	0.999641		VEGFA	0.996376	0.0122892	0.198993	0.844613	0.041668	0.451661	both	0.198993
CPD				0.647795	0.0288245	0.872866	Foralumab	0.872866		GCNA				0.757694	0.0297211	0.999641	Foralumab	0.999641		ATG3	-0.654321	0.0123673	0.199328	-0.680684	0.0494177	0.491818	both	0.199328
SHMT2				-0.643104	0.0286357	0.872866	Foralumab	0.872866		GEN1				0.710645	0.0425834	0.999641	Foralumab	0.999641		RPL34	0.537896	0.0125096	0.200399	0.481482	0.0451562	0.472874	both	0.200399
SNX11				0.598957	0.0288008	0.872866	Foralumab	0.872866		GTDC1				0.703129	0.0288133	0.999641	Foralumab	0.999641		ZDHHC12	-0.867315	0.0128284	0.203693	-1.00621	0.011487	0.256261	both	0.203693
NLRP2				-0.642748	0.0289875	0.874497	Foralumab	0.874497		H1-2				-0.715857	0.0376154	0.999641	Foralumab	0.999641		MCEMP1	0.761697	0.0470388	0.389364	1.16679	0.00745281	0.207512	both	0.207512
STAT2				-0.48699	0.0290846	0.874497	Foralumab	0.874497		HS3ST1				-0.688438	0.0402072	0.999641	Foralumab	0.999641		ARMC10	-0.834348	0.0133742	0.208496	-0.879368	0.0214111	0.338815	both	0.208496
ETFDH				-0.649042	0.0292343	0.875891	Foralumab	0.875891		HSD17B4				-0.727294	0.0273996	0.999641	Foralumab	0.999641		RPL7A	0.635725	0.013577	0.210004	0.675218	0.0260138	0.371372	both	0.210004
GZMB				-0.606233	0.0295139	0.878281	Foralumab	0.878281		IGHV1-3				-0.664785	0.0295242	0.999641	Foralumab	0.999641		SSBP3	0.93694	0.0140816	0.213788	0.908841	0.0335906	0.416741	both	0.213788
METTL16				0.6215	0.0295212	0.878281	Foralumab	0.878281		IGHV3-72				0.545369	0.0482218	0.999641	Foralumab	0.999641		ANKRD13D	-1.02549	0.0141507	0.214116	-0.735247	0.0300118	0.396973	both	0.214116
ALOX5AP				-0.566319	0.0297552	0.882149	Foralumab	0.882149		IGKV4-1				0.722114	0.0307365	0.999641	Foralumab	0.999641		RFX2	0.95667	0.0142614	0.215068	1.15048	0.0122066	0.264235	both	0.215068
SGF29				-0.601502	0.0299273	0.884158	Foralumab	0.884158		IGLV3-10				-0.504443	0.0418138	0.999641	Foralumab	0.999641		FURIN	0.588627	0.021626	0.26818	0.878985	0.00788062	0.215826	both	0.215826
CLIC1				-0.562986	0.03017	0.88706	Foralumab	0.88706		IL4R				-0.633388	0.0354196	0.999641	Foralumab	0.999641		TXNIP	-0.617643	0.0162946	0.230299	-0.766408	0.00807295	0.216281	both	0.216281
PALM2AKAP2				-0.622582	0.0302347	0.88706	Foralumab	0.88706		ILK				0.662069	0.0411797	0.999641	Foralumab	0.999641		PYCARD	-0.644816	0.0146103	0.218137	-0.644631	0.044926	0.472241	both	0.218137
HSPA4L				-0.501155	0.0306025	0.887087	Foralumab	0.887087		INSR				0.689946	0.0498567	0.999641	Foralumab	0.999641		MIIP	-0.748173	0.0361361	0.344633	-0.771012	0.00866186	0.221281	both	0.221281
KPNB1				-0.465563	0.0306541	0.887087	Foralumab	0.887087		IRF4				0.553636	0.0352448	0.999641	Foralumab	0.999641		HPSE	0.808143	0.0150849	0.221934	0.842953	0.0355553	0.425477	both	0.221934
UQCR10				-0.531434	0.0305112	0.887087	Foralumab	0.887087		ITSN2				0.653606	0.0288818	0.999641	Foralumab	0.999641		FLI1	-0.836723	0.0195776	0.253608	-0.996829	0.00938756	0.228178	both	0.228178
ZKSCAN1				-0.449516	0.0305451	0.887087	Foralumab	0.887087		KATNBL1				-0.644549	0.0431964	0.999641	Foralumab	0.999641		HNRNPH1	0.401494	0.0249399	0.284245	0.506066	0.00941487	0.228178	both	0.228178
ACACB				-0.637731	0.0309116	0.891495	Foralumab	0.891495		KPNA1				0.617885	0.0397784	0.999641	Foralumab	0.999641		EIF3H	0.84064	0.0161601	0.229116	0.952124	0.0304126	0.398948	both	0.229116
POLR2A				-0.248534	0.0310461	0.892338	Foralumab	0.892338		LAIR1				-0.760614	0.0269098	0.999641	Foralumab	0.999641		ARHGAP27	-0.663502	0.0262503	0.291233	-0.873851	0.00983579	0.234484	both	0.234484
PFKFB3				0.603964	0.0313209	0.894654	Foralumab	0.894654		LARP4B				-0.700552	0.033167	0.999641	Foralumab	0.999641		FAM217B	-0.89776	0.0176067	0.240171	-0.873352	0.0291056	0.393195	both	0.240171
CASP10				-0.55819	0.031816	0.895728	Foralumab	0.895728		LRIF1				-0.739353	0.0300599	0.999641	Foralumab	0.999641		ACP2	-0.860136	0.0266739	0.294296	-1.13392	0.0104705	0.243085	both	0.243085
CLN3				0.491925	0.0318218	0.895728	Foralumab	0.895728		MAN2B1				0.606997	0.0304886	0.999641	Foralumab	0.999641		CYBB	-0.580988	0.0345574	0.335259	-0.731677	0.0104727	0.243085	both	0.243085
GPCPD1				0.446412	0.0321148	0.895728	Foralumab	0.895728		MFSD9				0.672897	0.0404846	0.999641	Foralumab	0.999641		GBP4	-0.765532	0.0210403	0.264359	-0.833086	0.0106127	0.244397	both	0.244397
HSBP1				-0.634189	0.0316025	0.895728	Foralumab	0.895728		MOB3B				-0.772141	0.0260315	0.999641	Foralumab	0.999641		ZC3HAV1	-0.713892	0.0181598	0.244884	-0.854728	0.0196085	0.328083	both	0.244884
NUP98				0.582735	0.0321055	0.895728	Foralumab	0.895728		MRPL22				0.660295	0.0357933	0.999641	Foralumab	0.999641		ITGA5	0.794985	0.0182454	0.245169	0.948797	0.0225454	0.345523	both	0.245169
PHKA2				0.649221	0.0315736	0.895728	Foralumab	0.895728		MT-CO3				0.424731	0.0357458	0.999641	Foralumab	0.999641		C1orf162	-0.645533	0.0182846	0.24533	-0.702041	0.0202435	0.328901	both	0.24533
SLC52A1				0.631322	0.0319659	0.895728	Foralumab	0.895728		MYSM1				0.595426	0.0432642	0.999641	Foralumab	0.999641		RPL26	0.598787	0.0187747	0.248858	0.572159	0.0471987	0.48291	both	0.248858
EEF1E1				-0.638663	0.032464	0.902499	Foralumab	0.902499		NRIP1				0.72802	0.0414304	0.999641	Foralumab	0.999641		QARS1	0.583167	0.0190168	0.250305	0.829458	0.0217662	0.34166	both	0.250305
ZBP1				-0.645554	0.0326341	0.904264	Foralumab	0.904264		NSD1				-0.699244	0.0425922	0.999641	Foralumab	0.999641		PMPCA	0.543561	0.0194825	0.253219	0.630725	0.0426647	0.459514	both	0.253219
SLC5A6				0.50226	0.0328524	0.907346	Foralumab	0.907346		NSMCE1				-0.7382	0.0343255	0.999641	Foralumab	0.999641		HNRNPA1	0.558991	0.0198645	0.255851	0.686994	0.0429683	0.459514	both	0.255851
CD69				0.495883	0.0330094	0.908724	Foralumab	0.908724		NUP93				0.60727	0.0445334	0.999641	Foralumab	0.999641		CBFB	0.774515	0.021366	0.267165	0.856975	0.0167718	0.307797	both	0.267165
ZBED5				0.588865	0.0334161	0.916943	Foralumab	0.916943		NXF1				-0.51527	0.042762	0.999641	Foralumab	0.999641		DHX40	-0.88506	0.0342198	0.333219	-1.12845	0.012905	0.26821	both	0.26821
DNAJA4				0.585039	0.0336847	0.92133	Foralumab	0.92133		OR10A2				0.72398	0.0407167	0.999641	Foralumab	0.999641		NUDT16	-0.838018	0.0293427	0.30878	-1.03265	0.0133827	0.273464	both	0.273464
AARS1				-0.647893	0.0341807	0.924966	Foralumab	0.924966		OSGEP				0.63606	0.0367036	0.999641	Foralumab	0.999641		PEBP1	0.675562	0.0225855	0.27478	0.745037	0.0323821	0.407289	both	0.27478
CAMK4				0.462026	0.0340276	0.924966	Foralumab	0.924966		PCDH9				-0.668627	0.0440076	0.999641	Foralumab	0.999641		ATP5IF1	-0.549239	0.0227367	0.275917	-0.872635	0.0322581	0.40643	both	0.275917
EHD1				0.609057	0.0344434	0.924966	Foralumab	0.924966		PDP2				0.706697	0.0379798	0.999641	Foralumab	0.999641		TSC22D1	0.966109	0.0228438	0.275983	1.00524	0.0248114	0.364362	both	0.275983
INTS1				-0.548553	0.034072	0.924966	Foralumab	0.924966		PGGHG				-0.584072	0.0405293	0.999641	Foralumab	0.999641		RPL23	0.589316	0.0228718	0.275983	0.610972	0.0414358	0.450882	both	0.275983
PTGES3L				0.646641	0.0346174	0.924966	Foralumab	0.924966		PLPP5				-0.653074	0.0467836	0.999641	Foralumab	0.999641		IL27RA	-0.749636	0.023328	0.278914	-0.750287	0.0415343	0.450882	both	0.278914
RAC2				-0.415531	0.0345517	0.924966	Foralumab	0.924966		POLK				0.664815	0.0495528	0.999641	Foralumab	0.999641		MRPL16	-0.810285	0.0234892	0.279984	-0.723388	0.0494035	0.491818	both	0.279984
RPL13A				0.354288	0.0343294	0.924966	Foralumab	0.924966		POLR3B				-0.751293	0.0327812	0.999641	Foralumab	0.999641		KAT6A	0.638629	0.0241512	0.283485	0.654242	0.0356249	0.425477	both	0.283485
TRBV18				-0.646477	0.0346903	0.924966	Foralumab	0.924966		PPM1K				-0.53556	0.0430695	0.999641	Foralumab	0.999641		ZNF500	-0.857974	0.024504	0.283602	-0.876047	0.0452924	0.472874	both	0.283602
DOCK11				-0.625336	0.0350717	0.925638	Foralumab	0.925638		PPP1R11				-0.595947	0.0467378	0.999641	Foralumab	0.999641		SLC25A5	0.60912	0.0247522	0.284245	0.74755	0.0228606	0.347656	both	0.284245
DPF2				-0.600686	0.0353077	0.925638	Foralumab	0.925638		PRKD2				0.587401	0.0343131	0.999641	Foralumab	0.999641		RALA	0.830535	0.0249355	0.284245	0.875708	0.0415192	0.450882	both	0.284245
LIG3				-0.552786	0.0349275	0.925638	Foralumab	0.925638		RBM3				0.521292	0.0443942	0.999641	Foralumab	0.999641		RPL13A	0.541996	0.0250684	0.284245	0.505996	0.0436085	0.463062	both	0.284245
LMAN2				-0.480979	0.0353705	0.925638	Foralumab	0.925638		RBM7				-0.584575	0.0269999	0.999641	Foralumab	0.999641		RPS15A	0.541999	0.0253031	0.284641	0.547506	0.0493927	0.491818	both	0.284641
SHFL				-0.631918	0.0351897	0.925638	Foralumab	0.925638		RGS10				0.715346	0.0438932	0.999641	Foralumab	0.999641		RPS5	0.700146	0.0256147	0.286471	0.785472	0.0192219	0.324806	both	0.286471
TANC2				0.571843	0.0350037	0.925638	Foralumab	0.925638		RHOB				-0.791209	0.0282573	0.999641	Foralumab	0.999641		AGAP3	0.7169	0.0257644	0.287431	0.81486	0.0262918	0.373149	both	0.287431
CTRC				0.637577	0.0359188	0.931363	Foralumab	0.931363		RNF2				0.686919	0.0297356	0.999641	Foralumab	0.999641		RPS20	0.477975	0.0263384	0.291666	0.523017	0.0315958	0.402058	both	0.291666
MYO9B				0.61615	0.0358413	0.931363	Foralumab	0.931363		RNF227				0.656809	0.0259552	0.999641	Foralumab	0.999641		SNX9	0.658942	0.0321747	0.324377	0.952827	0.0148149	0.293133	both	0.293133
RPS14				0.439244	0.0359059	0.931363	Foralumab	0.931363		RYBP				0.714033	0.0384311	0.999641	Foralumab	0.999641		RAPGEF1	0.761279	0.0272125	0.298047	0.893453	0.0153894	0.298938	both	0.298047
SECISBP2L				0.550976	0.0363574	0.939861	Foralumab	0.939861		S1PR2				0.676717	0.0459392	0.999641	Foralumab	0.999641		RBM3	0.586511	0.02976	0.310822	0.914208	0.0156128	0.298938	both	0.298938
INPP5D				0.47892	0.0370988	0.950335	Foralumab	0.950335		SELENOI				0.689051	0.0453033	0.999641	Foralumab	0.999641		MICU1	-0.647338	0.0275703	0.300627	-0.731309	0.0402372	0.450155	both	0.300627
LDB1				0.588906	0.0369938	0.950335	Foralumab	0.950335		SELL				-0.55643	0.0483603	0.999641	Foralumab	0.999641		FAM168A	-0.750228	0.0275935	0.300627	-0.664534	0.0343667	0.420171	both	0.300627
ZNF131				0.53906	0.0368944	0.950335	Foralumab	0.950335		SESN3				0.700451	0.0279156	0.999641	Foralumab	0.999641		ADM	0.758934	0.0322646	0.32492	0.873193	0.0158729	0.303123	both	0.303123
TAFAZZIN				-0.62004	0.0372254	0.950705	Foralumab	0.950705		SFI1				-0.636568	0.0499518	0.999641	Foralumab	0.999641		PSME2	-0.529663	0.04752	0.389638	-0.694038	0.016563	0.307448	both	0.307448
NKTR				0.63509	0.0374992	0.954822	Foralumab	0.954822		SIDT1				-0.563704	0.0313426	0.999641	Foralumab	0.999641		ANKRD10	0.460274	0.0396325	0.358605	0.614697	0.0168349	0.307797	both	0.307797
RPSA				0.302329	0.0377129	0.957389	Foralumab	0.957389		SLC25A5				0.463414	0.0377602	0.999641	Foralumab	0.999641		DNAJC16	-0.691666	0.04283	0.370411	-0.929005	0.0167828	0.307797	both	0.307797
C21orf91				0.611886	0.0387004	0.965119	Foralumab	0.965119		SLC6A6				0.756825	0.0262309	0.999641	Foralumab	0.999641		HSP90AB1	0.549304	0.0293222	0.30878	0.697769	0.0172824	0.310292	both	0.30878
CDC27				-0.574004	0.0386164	0.965119	Foralumab	0.965119		SNRPN				-0.463787	0.0465294	0.999641	Foralumab	0.999641		NINJ1	0.6638	0.0295464	0.309471	0.777412	0.0198471	0.328863	both	0.309471
GPRASP1				0.505456	0.0386641	0.965119	Foralumab	0.965119		SPC25				0.720877	0.04285	0.999641	Foralumab	0.999641		ATP2A3	0.674008	0.0482904	0.390618	0.991578	0.0180253	0.315932	both	0.315932
IKBIP				-0.624982	0.0385746	0.965119	Foralumab	0.965119		STAP1				-0.531294	0.0466292	0.999641	Foralumab	0.999641		RNF135	-0.677114	0.0303901	0.316669	-0.821437	0.0252615	0.36783	both	0.316669
IQGAP2				-0.551446	0.038438	0.965119	Foralumab	0.965119		SYNRG				0.62538	0.0489671	0.999641	Foralumab	0.999641		BBX	-0.766283	0.0365405	0.347385	-0.965002	0.0185335	0.318122	both	0.318122
POFUT1				-0.597394	0.0384426	0.965119	Foralumab	0.965119		TES				0.54531	0.0287433	0.999641	Foralumab	0.999641		STOM	-0.68696	0.0310906	0.320262	-0.859081	0.0188758	0.321726	both	0.320262
PALS2				-0.623435	0.038974	0.967172	Foralumab	0.967172		TET2				0.53544	0.0361278	0.999641	Foralumab	0.999641		SDC4	0.829442	0.0313492	0.320774	0.904861	0.02943	0.39538	both	0.320774
SPATA6L				0.632026	0.0390108	0.967172	Foralumab	0.967172		TFDP1				0.709472	0.0454559	0.999641	Foralumab	0.999641		PRNP	0.744489	0.0314141	0.320774	0.866537	0.0352292	0.425477	both	0.320774
TRIM14				-0.556983	0.0392749	0.970881	Foralumab	0.970881		TLR1				0.673633	0.03552	0.999641	Foralumab	0.999641		RPS13	0.568674	0.032342	0.325335	0.593107	0.0415193	0.450882	both	0.325335
NINJ1				0.611977	0.0395684	0.975292	Foralumab	0.975292		TM9SF1				0.670197	0.0316421	0.999641	Foralumab	0.999641		EIF1B	0.454628	0.0330086	0.327288	0.758164	0.0229763	0.347656	both	0.327288
ATG4B				0.531078	0.0403625	0.980051	Foralumab	0.980051		TMA7				0.47361	0.0476065	0.999641	Foralumab	0.999641		PHF10	0.653058	0.0498321	0.395974	1.00365	0.0221216	0.34332	both	0.34332
FBXO25				-0.615504	0.040201	0.980051	Foralumab	0.980051		TMBIM1				0.678748	0.0264644	0.999641	Foralumab	0.999641		KCTD7	0.647295	0.0376714	0.351563	0.787573	0.0230182	0.347656	both	0.347656
RAB11FIP3				0.563463	0.0401965	0.980051	Foralumab	0.980051		TMEM39B				-0.719732	0.0310744	0.999641	Foralumab	0.999641		ABI2	0.769932	0.0366837	0.347894	-0.701658	0.0389683	0.442589	both	0.347894
RPS18				0.388775	0.040455	0.980051	Foralumab	0.980051		TMLHE				-0.69798	0.0411109	0.999641	Foralumab	0.999641		RPS3	0.575291	0.0371379	0.350256	0.6171	0.0430795	0.459514	both	0.350256
SETD5				-0.58143	0.040274	0.980051	Foralumab	0.980051		TOMM34				-0.672778	0.0353801	0.999641	Foralumab	0.999641		EIF4G2	0.461698	0.037613	0.351563	0.680951	0.0366854	0.432343	both	0.351563
TNRC6B				0.396369	0.0404069	0.980051	Foralumab	0.980051		TP53BP2				0.678033	0.0417339	0.999641	Foralumab	0.999641		MRPS23	-0.718032	0.0380873	0.351681	-0.854158	0.0405762	0.450155	both	0.351681
FHIP1A				0.321794	0.0406644	0.982317	Foralumab	0.982317		TP53INP2				0.692548	0.041594	0.999641	Foralumab	0.999641		CHST2	0.79096	0.0385874	0.353251	0.984562	0.0334178	0.415608	both	0.353251
DNM2				0.609521	0.041129	0.988347	Foralumab	0.988347		TRABD				0.714422	0.0366243	0.999641	Foralumab	0.999641		RPL21	0.605164	0.0392476	0.356915	0.605579	0.0256967	0.371077	both	0.356915
MAP3K3				0.523327	0.0411471	0.988347	Foralumab	0.988347		TRIM25				-0.670601	0.0464823	0.999641	Foralumab	0.999641		ATG9A	-0.663924	0.0431157	0.370974	0.76316	0.0442326	0.467648	both	0.370974
CNIH4				-0.539008	0.0416206	0.988518	Foralumab	0.988518		TRMT11				0.739693	0.0375523	0.999641	Foralumab	0.999641		CTNNB1	0.486742	0.0431415	0.370974	0.757687	0.0322269	0.40643	both	0.370974
CYTH1				0.38004	0.0412711	0.988518	Foralumab	0.988518		TRMT2A				-0.721028	0.0425698	0.999641	Foralumab	0.999641		CD58	0.659277	0.0451844	0.379967	0.754161	0.0452955	0.472874	both	0.379967
NR2C2				0.572149	0.0415333	0.988518	Foralumab	0.988518		UBA3				-0.771645	0.0286855	0.999641	Foralumab	0.999641		AREG				1.99446	2.68625e-07	0.000178147	Foralumab	0.000178147
PAIP1				0.604462	0.0415947	0.988518	Foralumab	0.988518		UVRAG				-0.655834	0.0338555	0.999641	Foralumab	0.999641		IL15				-1.51865	1.38659e-05	0.00436772	Foralumab	0.00436772
GBA				-0.566376	0.0417488	0.988794	Foralumab	0.988794		WWC3				-0.593665	0.0462723	0.999641	Foralumab	0.999641		TNFAIP3				1.51699	2.66133e-05	0.00622095	Foralumab	0.00622095
FBXL20				0.469931	0.0426616	0.995141	Foralumab	0.995141		YBX3				-0.762224	0.0291829	0.999641	Foralumab	0.999641		PALM2AKAP2				1.67842	3.06645e-05	0.00651572	Foralumab	0.00651572
KIR2DL3				-0.595419	0.0425142	0.995141	Foralumab	0.995141		ZGRF1				0.737454	0.0295172	0.999641	Foralumab	0.999641		PFKFB4				-1.53932	3.80405e-05	0.00731715	Foralumab	0.00731715
PLCG1				0.577259	0.0425725	0.995141	Foralumab	0.995141		ZKSCAN8				0.634903	0.0469444	0.999641	Foralumab	0.999641		ELL2				1.59272	6.75774e-05	0.0107169	Foralumab	0.0107169
PNPO				-0.561797	0.0429557	0.995141	Foralumab	0.995141		ZMYM6				0.648714	0.0466213	0.999641	Foralumab	0.999641		TNFSF14				1.61673	8.84594e-05	0.013444	Foralumab	0.013444
RPS15A				0.393656	0.0427106	0.995141	Foralumab	0.995141		ZNF10				-0.716838	0.0377468	0.999641	Foralumab	0.999641		USP12				1.56269	0.000110937	0.0161856	Foralumab	0.0161856
RPS16				0.365888	0.0427937	0.995141	Foralumab	0.995141		ZNF346				-0.586176	0.0387217	0.999641	Foralumab	0.999641		CYB5D1				1.21667	0.000115251	0.0164854	Foralumab	0.0164854
STIM2				0.596865	0.042858	0.995141	Foralumab	0.995141		ZNF382				-0.52527	0.0479565	0.999641	Foralumab	0.999641		ANKRD22				-1.79572	0.000142141	0.0195497	Foralumab	0.0195497
ADGRE5				-0.438642	0.0456793	0.99879	Foralumab	0.99879		ZNF606				-0.731201	0.0372775	0.999641	Foralumab	0.999641		BTN3A3				-1.69549	0.000144714	0.0195497	Foralumab	0.0195497
AXIN1				0.599287	0.0440065	0.99879	Foralumab	0.99879		ZNF620				0.72965	0.0287961	0.999641	Foralumab	0.999641		NR4A3				1.14997	0.000159627	0.0207943	Foralumab	0.0207943
BAZ1A				-0.591792	0.0463641	0.99879	Foralumab	0.99879		ZSWIM8				0.708331	0.0405057	0.999641	Foralumab	0.999641		IL1R2				1.68087	0.000166276	0.0212805	Foralumab	0.0212805
CASP8AP2				-0.577286	0.0464115	0.99879	Foralumab	0.99879		HERC6	-2.48057	3.0575e-09	4.7269e-06				Untreated	4.7269e-06		ETS2				1.10172	0.000198774	0.0230168	Foralumab	0.0230168
CHMP1A				-0.472862	0.0462224	0.99879	Foralumab	0.99879		CEPT1	-2.28344	2.84567e-08	2.63965e-05				Untreated	2.63965e-05		G3BP2				1.16276	0.000196591	0.0230168	Foralumab	0.0230168
LETMD1				-0.460205	0.0454143	0.99879	Foralumab	0.99879		OAS2	-1.80137	4.74805e-07	0.000367024				Untreated	0.000367024		NDUFA9				-1.06211	0.000189847	0.0230168	Foralumab	0.0230168
LIN7C				0.549477	0.0460783	0.99879	Foralumab	0.99879		IFI27	-1.71816	2.10792e-06	0.00150025				Untreated	0.00150025		MYO10				1.49837	0.000248345	0.0268136	Foralumab	0.0268136
PABPC1				0.333179	0.0444532	0.99879	Foralumab	0.99879		STAT1	-1.69138	2.26428e-06	0.00150025				Untreated	0.00150025		CCL3				1.49119	0.000298318	0.0292471	Foralumab	0.0292471
PACS1				-0.568827	0.043869	0.99879	Foralumab	0.99879		USP18	-1.88641	4.5065e-06	0.00278682				Untreated	0.00278682		SPTLC2				-1.54944	0.000281487	0.0292471	Foralumab	0.0292471
PARP2				-0.602909	0.0452888	0.99879	Foralumab	0.99879		OASL	-1.78144	5.1152e-06	0.00296553				Untreated	0.00296553		UBXN7				-1.26446	0.00029424	0.0292471	Foralumab	0.0292471
PHYKPL				0.536382	0.0434949	0.99879	Foralumab	0.99879		PARP9	-1.46857	6.79128e-06	0.00370564				Untreated	0.00370564		CCL4L2				1.57918	0.000415703	0.0369591	Foralumab	0.0369591
PIGA				0.526517	0.045204	0.99879	Foralumab	0.99879		DNMT1	1.43873	2.66612e-05	0.0123655				Untreated	0.0123655		PSMG4				-1.55048	0.000425574	0.0369591	Foralumab	0.0369591
RARS1				-0.575068	0.0453548	0.99879	Foralumab	0.99879		CMPK2	-1.58333	3.36824e-05	0.014878				Untreated	0.014878		ITGAV				1.60267	0.00050616	0.0405762	Foralumab	0.0405762
RELT				0.612295	0.0439099	0.99879	Foralumab	0.99879		IGLV2-23	-1.48049	7.27855e-05	0.030689				Untreated	0.030689		RGCC				1.13115	0.000548618	0.0425762	Foralumab	0.0425762
RPS13				0.396824	0.0447438	0.99879	Foralumab	0.99879		JADE3	1.45528	8.14278e-05	0.0315204				Untreated	0.0315204		USP24				1.4898	0.000548224	0.0425762	Foralumab	0.0425762
SLCO3A1				0.56433	0.0461142	0.99879	Foralumab	0.99879		TMCC1	-1.40197	8.15535e-05	0.0315204				Untreated	0.0315204		UBA3				1.47789	0.000664526	0.0475267	Foralumab	0.0475267
SUMO1				-0.465904	0.0452182	0.99879	Foralumab	0.99879		SLC6A16	1.3485	9.80962e-05	0.0349977				Untreated	0.0349977		MT-ATP8				0.965085	0.000735625	0.0515998	Foralumab	0.0515998
TATDN3				0.550438	0.0443076	0.99879	Foralumab	0.99879		RNF213	-1.07271	0.000107586	0.0369616				Untreated	0.0369616		CITED2				1.13899	0.000821705	0.0565504	Foralumab	0.0565504
TBC1D3L				0.516784	0.0461457	0.99879	Foralumab	0.99879		SNX9	1.23	0.00011487	0.0380549				Untreated	0.0380549		NFE2L1				-1.47541	0.00105509	0.0687221	Foralumab	0.0687221
TOPBP1				-0.596844	0.0437512	0.99879	Foralumab	0.99879		LAP3	-1.37436	0.000124684	0.0398817				Untreated	0.0398817		RICTOR				-1.31004	0.00106751	0.0689159	Foralumab	0.0689159
TRIM56				-0.36204	0.0459397	0.99879	Foralumab	0.99879		OAS1	-1.27635	0.000140217	0.043355				Untreated	0.043355		SEL1L3				1.49375	0.00108173	0.0692211	Foralumab	0.0692211
TUBB				-0.510925	0.044589	0.99879	Foralumab	0.99879		TLR7	-1.24691	0.000152006	0.045484				Untreated	0.045484		BAIAP2				1.13221	0.00149259	0.083118	Foralumab	0.083118
UBA7				-0.378828	0.0441277	0.99879	Foralumab	0.99879		ULK4	1.28177	0.000220865	0.0602571				Untreated	0.0602571		CSF1				1.43625	0.00146166	0.083118	Foralumab	0.083118
UBE3A				0.545943	0.0459385	0.99879	Foralumab	0.99879		UBE2L6	-1.18583	0.000239475	0.0634678				Untreated	0.0634678		ICAM2				-0.962117	0.00149002	0.083118	Foralumab	0.083118
ZDHHC3				0.592273	0.0444269	0.99879	Foralumab	0.99879		AP3M2	1.34823	0.000377741	0.0947006				Untreated	0.0947006		PCNT				-1.32209	0.00148777	0.083118	Foralumab	0.083118
ZNF850				0.546207	0.046202	0.99879	Foralumab	0.99879		QSOX1	1.28546	0.000422061	0.097876				Untreated	0.097876		UBE2H				1.11879	0.0014545	0.083118	Foralumab	0.083118
ATF7				0.5929	0.0489519	0.999787	Foralumab	0.999787		TXNL4A	1.16542	0.000511303	0.112925				Untreated	0.112925		MEI1				1.37955	0.00151405	0.0836743	Foralumab	0.0836743
BTAF1				0.102103	0.0495602	0.999787	Foralumab	0.999787		BLNK	-1.00549	0.000528823	0.114078				Untreated	0.114078		DDX19B				1.08062	0.00163638	0.0897547	Foralumab	0.0897547
CALM1				-0.389893	0.0488812	0.999787	Foralumab	0.999787		CASP8AP2	-1.28035	0.000632279	0.130337				Untreated	0.130337		APC				-1.35283	0.00173663	0.0938424	Foralumab	0.0938424
CZIB				-0.598253	0.0471272	0.999787	Foralumab	0.999787		IGHV4-59	-1.16185	0.000632293	0.130337				Untreated	0.130337		MET				1.43884	0.00176569	0.0947112	Foralumab	0.0947112
EXTL3				0.575572	0.0473903	0.999787	Foralumab	0.999787		CCSER1	-1.22595	0.000655522	0.132187				Untreated	0.132187		GEMIN4				1.31893	0.00181127	0.0957478	Foralumab	0.0957478
FAM102A				0.441971	0.047304	0.999787	Foralumab	0.999787		RSAD2	-1.28225	0.000708469	0.139825				Untreated	0.139825		RBBP8				1.25942	0.00187968	0.0986496	Foralumab	0.0986496
FSTL4				0.546692	0.0486396	0.999787	Foralumab	0.999787		LY6E	-1.09266	0.000770251	0.145813				Untreated	0.145813		TBCC				-1.21782	0.00192227	0.0993424	Foralumab	0.0993424
GRSF1				-0.588734	0.0497411	0.999787	Foralumab	0.999787		MADD	-1.09936	0.00111499	0.202798				Untreated	0.202798		ITGB7				-1.09441	0.00195479	0.0994618	Foralumab	0.0994618
MVB12A				-0.608766	0.047701	0.999787	Foralumab	0.999787		NBPF14	-0.978133	0.00146649	0.256664				Untreated	0.256664		PLD1				-1.38801	0.00207104	0.0994618	Foralumab	0.0994618
PFKP				-0.544403	0.0485132	0.999787	Foralumab	0.999787		TREX1	-1.10397	0.00151026	0.256832				Untreated	0.256832		SMIM3				1.34364	0.00205516	0.0994618	Foralumab	0.0994618
PGAM1				-0.411628	0.0488155	0.999787	Foralumab	0.999787		BTBD7	1.144	0.00170371	0.277256				Untreated	0.277256		CD109				1.321	0.00216516	0.100604	Foralumab	0.100604
PIK3C3				-0.489414	0.0485029	0.999787	Foralumab	0.999787		U2SURP	0.921642	0.00168158	0.277256				Untreated	0.277256		CD82				1.15731	0.00220199	0.101028	Foralumab	0.101028
RB1CC1				0.534188	0.0477718	0.999787	Foralumab	0.999787		PLSCR1	-1.18869	0.00184497	0.290067				Untreated	0.290067		GYS1				-1.12269	0.00227208	0.103592	Foralumab	0.103592
RPS25				0.311719	0.0480043	0.999787	Foralumab	0.999787		IGHV1-18	1.17163	0.0018951	0.292982				Untreated	0.292982		PLK2				1.33531	0.00229257	0.103662	Foralumab	0.103662
SLC37A1				-0.596539	0.0498189	0.999787	Foralumab	0.999787		KIAA2026	-1.05559	0.00199206	0.302924				Untreated	0.302924		APOBEC3G				-1.32055	0.00238884	0.10585	Foralumab	0.10585
TESPA1				0.441294	0.0498862	0.999787	Foralumab	0.999787		ARHGAP9	-0.926533	0.00215909	0.323028				Untreated	0.323028		SRGAP2B				-1.11762	0.00239414	0.10585	Foralumab	0.10585
TP53				-0.551591	0.0478607	0.999787	Foralumab	0.999787		ICAM2	-0.943201	0.0022697	0.32408				Untreated	0.32408		METAP2				1.22753	0.0024321	0.106881	Foralumab	0.106881
ZNF774				-0.533805	0.0497708	0.999787	Foralumab	0.999787		NDUFAF5	1.11012	0.00227094	0.32408				Untreated	0.32408		PDE4A				0.935826	0.00244739	0.106908	Foralumab	0.106908
SP2	1.56653	8.61517e-08	0.000385012				Untreated	0.000385012		RAD51	-1.13901	0.00222035	0.32408				Untreated	0.32408		TBC1D7				1.01415	0.00248363	0.107846	Foralumab	0.107846
CATSPER2	1.55871	4.45715e-07	0.00132793				Untreated	0.00132793		CXXC1	-0.997633	0.00240268	0.326315				Untreated	0.326315		KLHL21				0.945217	0.00255711	0.10973	Foralumab	0.10973
SH2D1A	1.25451	2.45008e-06	0.0054747				Untreated	0.0054747		RFC1	-1.06966	0.00232392	0.326315				Untreated	0.326315		BAZ1A				1.06211	0.00272677	0.114321	Foralumab	0.114321
RNF24	1.34339	4.99296e-06	0.00892542				Untreated	0.00892542		RRM2	-1.13825	0.00243094	0.326315				Untreated	0.326315		REPS1				1.19146	0.00299896	0.122907	Foralumab	0.122907
STIL	-1.24457	8.88296e-06	0.0132327				Untreated	0.0132327		SETD1A	1.13921	0.00246249	0.326315				Untreated	0.326315		DNASE1				-1.31356	0.00319341	0.128707	Foralumab	0.128707
H2AW	1.29245	3.77828e-05	0.0341666				Untreated	0.0341666		ZFAND2B	1.02944	0.00239213	0.326315				Untreated	0.326315		UAP1				1.25505	0.00326457	0.130137	Foralumab	0.130137
PMEPA1	1.22311	3.44447e-05	0.0341666				Untreated	0.0341666		ZNF136	0.923685	0.00260256	0.340018				Untreated	0.340018		C15orf39				-0.793137	0.00343375	0.133966	Foralumab	0.133966
SLC7A6	-1.07153	2.96167e-05	0.0341666				Untreated	0.0341666		DDX60	-1.09629	0.00273115	0.351863				Untreated	0.351863		DCUN1D5				1.33116	0.00344061	0.133966	Foralumab	0.133966
CISD2	-1.20419	6.12911e-05	0.04214				Untreated	0.04214		FKBP15	-1.07296	0.00278221	0.353531				Untreated	0.353531		HLA-DQA1				1.33919	0.00340446	0.133966	Foralumab	0.133966
WSB1	0.913453	7.2441e-05	0.0462484				Untreated	0.0462484		ACSL1	1.12299	0.00301573	0.377255				Untreated	0.377255		CALHM6				-1.16856	0.00350426	0.135257	Foralumab	0.135257
CDKN1A	1.18062	7.81422e-05	0.0465623				Untreated	0.0465623		PPEF2	1.11383	0.00305025	0.377255				Untreated	0.377255		SMAD4				-1.12612	0.0035931	0.136519	Foralumab	0.136519
VPS41	1.1258	0.000121745	0.0680096				Untreated	0.0680096		TMEM19	-0.889675	0.00309225	0.377418				Untreated	0.377418		PGAP2				-1.13477	0.00366824	0.137937	Foralumab	0.137937
H4C15	0.480672	0.000165521	0.0870249				Untreated	0.0870249		NUP50	-0.997199	0.00313573	0.377753				Untreated	0.377753		THAP2				1.19213	0.00374388	0.139345	Foralumab	0.139345
PTCH1	-1.09818	0.00021785	0.0973571				Untreated	0.0973571		CD38	-1.07331	0.00330567	0.388144				Untreated	0.388144		TNF				1.28858	0.00373656	0.139345	Foralumab	0.139345
HERC2	0.82777	0.000242348	0.0984593				Untreated	0.0984593		ZNF41	1.12794	0.00326638	0.388144				Untreated	0.388144		CCL3L3				1.21699	0.00389658	0.143083	Foralumab	0.143083
MRPS23	1.05758	0.000241207	0.0984593				Untreated	0.0984593		B3GALT1	1.08682	0.00346927	0.402262				Untreated	0.402262		CEBPB				0.962573	0.0039625	0.143813	Foralumab	0.143813
SINHCAF	0.920108	0.00034142	0.132679				Untreated	0.132679		IFIT1	-1.10889	0.00353979	0.405371				Untreated	0.405371		CASP1				-0.865521	0.0040765	0.14572	Foralumab	0.14572
ITGA5	0.853192	0.00038064	0.141757				Untreated	0.141757		OAS3	-1.00082	0.00367996	0.411268				Untreated	0.411268		MN1				1.11429	0.00421896	0.145864	Foralumab	0.145864
DMAC2L	-0.939481	0.000553421	0.190249				Untreated	0.190249		ZZZ3	-1.05749	0.00384946	0.425091				Untreated	0.425091		NCEH1				1.28563	0.00419023	0.145864	Foralumab	0.145864
PCNX1	-0.864572	0.000532938	0.190249				Untreated	0.190249		LGALS9	-0.912692	0.00390455	0.426102				Untreated	0.426102		SNAI1				1.20752	0.00419609	0.145864	Foralumab	0.145864
AGFG1	1.03899	0.000661738	0.21906				Untreated	0.21906		BTN3A3	-1.03484	0.00408368	0.435405				Untreated	0.435405		SOCS3				0.864846	0.00420977	0.145864	Foralumab	0.145864
PTPRE	1.01459	0.000761191	0.242983				Untreated	0.242983		ECSIT	-1.02162	0.00434354	0.447674				Untreated	0.447674		TGFB1				1.16853	0.00414379	0.145864	Foralumab	0.145864
HSPA1A	0.957862	0.0010252	0.273868				Untreated	0.273868		HSH2D	-0.688758	0.00424964	0.447674				Untreated	0.447674		WDR6				1.2552	0.00433091	0.147635	Foralumab	0.147635
ID2	0.948775	0.00123049	0.273868				Untreated	0.273868		MFSD8	-1.04714	0.00432831	0.447674				Untreated	0.447674		NFKBIA				1.00219	0.00441788	0.148577	Foralumab	0.148577
MBD3	-0.9723	0.000995494	0.273868				Untreated	0.273868		ABCB4	1.07736	0.00471523	0.480642				Untreated	0.480642		POFUT1				-1.18372	0.00439261	0.148577	Foralumab	0.148577
PLK2	0.91092	0.00118667	0.273868				Untreated	0.273868		RBM12	0.848531	0.00493769	0.492516				Untreated	0.492516		ARHGAP21				1.27391	0.00451831	0.149823	Foralumab	0.149823
TOB2	1.02643	0.00119822	0.273868				Untreated	0.273868		BTN3A2	-1.00104	0.00542738	0.525014				Untreated	0.525014		SESN2				1.16834	0.00454173	0.149918	Foralumab	0.149918
TTLL3	0.849318	0.00125627	0.273868				Untreated	0.273868		TBC1D1	0.882056	0.00543352	0.525014				Untreated	0.525014		MT-CYB				0.7997	0.00457321	0.150277	Foralumab	0.150277
ZDHHC7	0.970987	0.00119455	0.273868				Untreated	0.273868		GPATCH4	0.998488	0.00554103	0.529882				Untreated	0.529882		PDE4DIP				1.1758	0.00481813	0.157615	Foralumab	0.157615
SUPT6H	0.781738	0.00131041	0.278868				Untreated	0.278868		ADAR	-0.797912	0.0058745	0.544919				Untreated	0.544919		VIM				1.03301	0.00498741	0.162425	Foralumab	0.162425
LRRC37A2	0.990141	0.00143488	0.291476				Untreated	0.291476		FGFR1	-0.972135	0.00578097	0.544919				Untreated	0.544919		TSPAN3				0.900979	0.00502399	0.162889	Foralumab	0.162889
RELA	0.96837	0.00141342	0.291476				Untreated	0.291476		NBPF9	-1.01195	0.00587131	0.544919				Untreated	0.544919		COMMD4				-1.01724	0.00522456	0.167163	Foralumab	0.167163
H2AC18	0.963318	0.00159638	0.317076				Untreated	0.317076		NEIL1	0.851078	0.00634698	0.577202				Untreated	0.577202		SNX30				-0.962885	0.00526071	0.167585	Foralumab	0.167585
HEXIM1	0.970128	0.00167068	0.324621				Untreated	0.324621		STIM1	-0.924379	0.00630369	0.577202				Untreated	0.577202		GPRC5A				1.05396	0.00530225	0.167688	Foralumab	0.167688
EMP3	-0.793503	0.00194544	0.363051				Untreated	0.363051		POLD1	-0.997708	0.00650226	0.585582				Untreated	0.585582		SATB1				1.01333	0.00538977	0.168027	Foralumab	0.168027
LPIN1	0.846846	0.0019497	0.363051				Untreated	0.363051		ALG8	-1.00189	0.00693941	0.61757				Untreated	0.61757		TFRC				1.09618	0.00547216	0.16987	Foralumab	0.16987
IER2	0.861373	0.0022068	0.394488				Untreated	0.394488		MRPS18C	-0.979271	0.00699061	0.61757				Untreated	0.61757		DYNC1H1				-0.626496	0.00555275	0.171641	Foralumab	0.171641
PHF12	0.706642	0.00226917	0.397684				Untreated	0.397684		NDC1	-1.05024	0.00739775	0.647373				Untreated	0.647373		SERPINE1				1.13919	0.00571354	0.175127	Foralumab	0.175127
H2BC21	0.869048	0.00233848	0.40195				Untreated	0.40195		IGF1	-1.005	0.00750162	0.650328				Untreated	0.650328		EIF4G1				0.705138	0.00574725	0.175423	Foralumab	0.175423
TNF	0.939229	0.0023848	0.402176				Untreated	0.402176		RPS8	0.68308	0.00814267	0.692732				Untreated	0.692732		MT-ND3				0.759169	0.0060869	0.181586	Foralumab	0.181586
MLF2	0.750182	0.00319762	0.519643				Untreated	0.519643		SLC24A1	0.817848	0.00821481	0.692732				Untreated	0.692732		ZMYND8				-1.25244	0.00609849	0.181586	Foralumab	0.181586
FLCN	-0.903156	0.00350212	0.5373				Untreated	0.5373		CKS1B	-1.02428	0.00830174	0.693756				Untreated	0.693756		MAP4K4				0.931878	0.00614865	0.181597	Foralumab	0.181597
MYL12A	-0.619659	0.00346731	0.5373				Untreated	0.5373		CARD16	-1.0308	0.00839483	0.695271				Untreated	0.695271		KANSL2				0.853475	0.00647396	0.190433	Foralumab	0.190433
PFN1	-0.835795	0.00354673	0.5373				Untreated	0.5373		IGHV6-1	-1.00654	0.00876992	0.695297				Untreated	0.695297		LIMK2				-1.04716	0.0066297	0.19218	Foralumab	0.19218
SERTAD1	0.886429	0.00351953	0.5373				Untreated	0.5373		PITPNM1	-0.9586	0.00855913	0.695297				Untreated	0.695297		PCK2				-1.04137	0.00670435	0.19218	Foralumab	0.19218
COL28A1	0.827252	0.00369785	0.550856				Untreated	0.550856		WDR46	-0.927179	0.00874488	0.695297				Untreated	0.695297		PPM1F				-0.869448	0.00670445	0.19218	Foralumab	0.19218
PUM1	-0.772131	0.00398777	0.578924				Untreated	0.578924		ZFX	0.817913	0.0087681	0.695297				Untreated	0.695297		SPPL3				-1.0225	0.00664715	0.19218	Foralumab	0.19218
ZNF646	0.866907	0.00401581	0.578924				Untreated	0.578924		DCLRE1C	-0.755507	0.00889295	0.695925				Untreated	0.695925		USP32				-1.05524	0.00671774	0.19218	Foralumab	0.19218
RAB9A	-0.875088	0.00421045	0.59735				Untreated	0.59735		HDAC4	-0.899214	0.0090646	0.695925				Untreated	0.695925		PCNX2				-1.22639	0.00676986	0.192593	Foralumab	0.192593
NEK4	0.855444	0.00462838	0.636437				Untreated	0.636437		ZNF106	-0.909277	0.00907794	0.695925				Untreated	0.695925		SLC37A3				1.15143	0.00679852	0.192593	Foralumab	0.192593
H2BC8	0.847417	0.00471866	0.639021				Untreated	0.639021		SLC35A5	-0.928513	0.00920321	0.699746				Untreated	0.699746		SOX4				1.01666	0.00755953	0.209683	Foralumab	0.209683
PTBP1	0.835345	0.00487737	0.641087				Untreated	0.641087		COPS3	0.898431	0.0100744	0.747603				Untreated	0.747603		FARP1				0.981033	0.00783784	0.215762	Foralumab	0.215762
SLC2A5	0.866614	0.00483552	0.641087				Untreated	0.641087		H2AZ1	-0.766958	0.0100357	0.747603				Untreated	0.747603		SMG7				-0.941125	0.00800405	0.21597	Foralumab	0.21597
ACAP2	-0.823838	0.00522027	0.676214				Untreated	0.676214		UBE2J1	-0.871166	0.0102041	0.751215				Untreated	0.751215		EIF2AK3				0.973555	0.00818254	0.216281	Foralumab	0.216281
SLC39A10	-0.845424	0.00552078	0.704925				Untreated	0.704925		IFT122	-0.930764	0.0104056	0.760015				Untreated	0.760015		MYO1E				-1.18266	0.0081479	0.216281	Foralumab	0.216281
TK1	-0.862832	0.00563614	0.709519				Untreated	0.709519		EEF2K	0.782627	0.0108232	0.772279				Untreated	0.772279		NEK6				1.14272	0.00809995	0.216281	Foralumab	0.216281
FAHD2A	-0.811024	0.00594083	0.737488				Untreated	0.737488		TIMM13	-0.962079	0.010743	0.772279				Untreated	0.772279		SKP2				-1.18618	0.00818279	0.216281	Foralumab	0.216281
LTBP4	-0.82662	0.00643308	0.766651				Untreated	0.766651		ACSL5	-0.825023	0.0111155	0.773859				Untreated	0.773859		WBP11				0.997756	0.00821808	0.216429	Foralumab	0.216429
INSIG2	0.819068	0.00742052	0.811066				Untreated	0.811066		CARD8	-0.842048	0.0110463	0.773859				Untreated	0.773859		RALBP1				-0.927687	0.00826891	0.216985	Foralumab	0.216985
KLHL5	0.735788	0.00744097	0.811066				Untreated	0.811066		DOT1L	-0.944229	0.0114293	0.773859				Untreated	0.773859		NRDE2				-1.14188	0.00859797	0.220853	Foralumab	0.220853
KRR1	-0.731354	0.00721677	0.811066				Untreated	0.811066		FAM156B	0.969658	0.01136	0.773859				Untreated	0.773859		PLAAT4				-0.890497	0.0085844	0.220853	Foralumab	0.220853
SLC7A5	0.699028	0.00727975	0.811066				Untreated	0.811066		KCNQ5	-0.920046	0.0114232	0.773859				Untreated	0.773859		ZNF143				1.11649	0.00858501	0.220853	Foralumab	0.220853
TMEM94	-0.810109	0.00724496	0.811066				Untreated	0.811066		RPL22	0.681782	0.0111969	0.773859				Untreated	0.773859		PITPNC1				1.12246	0.00871143	0.221281	Foralumab	0.221281
TUBA4A	0.764684	0.00721726	0.811066				Untreated	0.811066		SQSTM1	0.809406	0.0111257	0.773859				Untreated	0.773859		TRAF3IP3				-0.938968	0.00873596	0.221281	Foralumab	0.221281
USP7	0.768398	0.00709204	0.811066				Untreated	0.811066		NDUFAF7	0.936915	0.0116039	0.779982				Untreated	0.779982		ARHGAP17				-0.900686	0.00892952	0.224624	Foralumab	0.224624
MLLT10	0.801028	0.00764221	0.813317				Untreated	0.813317		ARL10	0.926057	0.0120987	0.799869				Untreated	0.799869		LEPROT				0.867813	0.00910939	0.227305	Foralumab	0.227305
ST3GAL3	-0.715754	0.00787709	0.818668				Untreated	0.818668		PHACTR2	-0.910354	0.0121584	0.799869				Untreated	0.799869		UTY				-1.21187	0.00916076	0.227305	Foralumab	0.227305
SMARCA2	-0.794623	0.00819026	0.83187				Untreated	0.83187		RPS21	0.690305	0.0120205	0.799869				Untreated	0.799869		EXOG				1.16576	0.00928632	0.228178	Foralumab	0.228178
STN1	-0.758595	0.00817546	0.83187				Untreated	0.83187		KAT14	-0.954632	0.0123981	0.800222				Untreated	0.800222		MT-CO1				0.635915	0.00935455	0.228178	Foralumab	0.228178
BACH1	-0.803805	0.00858888	0.862555				Untreated	0.862555		LIG3	-0.889025	0.0124226	0.800222				Untreated	0.800222		NLRP3				0.838757	0.00958207	0.231461	Foralumab	0.231461
CNPPD1	0.678549	0.0090458	0.87063				Untreated	0.87063		PSMB9	-0.772958	0.0123298	0.800222				Untreated	0.800222		MVB12B				-1.15183	0.00975494	0.234088	Foralumab	0.234088
HADHA	0.561929	0.00880104	0.87063				Untreated	0.87063		CPNE5	-0.722756	0.0125974	0.805884				Untreated	0.805884		RGS16				0.956619	0.00975501	0.234088	Foralumab	0.234088
MPST	0.806214	0.00894145	0.87063				Untreated	0.87063		CDR2	-0.944976	0.0128202	0.806581				Untreated	0.806581		RPS6KA1				-0.764879	0.00979177	0.2342	Foralumab	0.2342
ACTR8	0.770064	0.0115066	0.886603				Untreated	0.886603		PCNA	-0.957966	0.0129153	0.806581				Untreated	0.806581		BHLHE40				0.764061	0.0100287	0.236761	Foralumab	0.236761
ALG9	0.686375	0.0100176	0.886603				Untreated	0.886603		PER2	0.807581	0.0127489	0.806581				Untreated	0.806581		EXOC5				-0.986416	0.0100093	0.236761	Foralumab	0.236761
ATR	-0.731332	0.00974875	0.886603				Untreated	0.886603		TRAM2	-0.832474	0.0129561	0.806581				Untreated	0.806581		ZDHHC3				1.08138	0.0101358	0.238519	Foralumab	0.238519
BANF1	-0.804488	0.0112446	0.886603				Untreated	0.886603		FBLN2	0.949263	0.0136816	0.818776				Untreated	0.818776		SYNE3				-0.708878	0.0104074	0.243085	Foralumab	0.243085
BRD2	0.569652	0.0109326	0.886603				Untreated	0.886603		PRKACB	-0.78629	0.0136784	0.818776				Untreated	0.818776		VIRMA				1.02512	0.0107437	0.24569	Foralumab	0.24569
CYTH2	-0.777318	0.0114462	0.886603				Untreated	0.886603		PSME2	-0.719484	0.0134713	0.818776				Untreated	0.818776		RHBDD2				0.940273	0.010999	0.249961	Foralumab	0.249961
DCK	0.794632	0.0108267	0.886603				Untreated	0.886603		ZNF28	0.909041	0.0135277	0.818776				Untreated	0.818776		INPP5F				-1.08302	0.0110631	0.250637	Foralumab	0.250637
DIP2C	0.774725	0.0110824	0.886603				Untreated	0.886603		ZNF765	0.809174	0.0135584	0.818776				Untreated	0.818776		GFOD1				0.927926	0.0115859	0.25768	Foralumab	0.25768
EGR1	0.54402	0.0105995	0.886603				Untreated	0.886603		ZNF778	0.915571	0.0133069	0.818776				Untreated	0.818776		TMED3				0.809357	0.0116911	0.259029	Foralumab	0.259029
HAUS1	-0.758352	0.0110333	0.886603				Untreated	0.886603		IGKV2D-28	-0.420597	0.0140084	0.832959				Untreated	0.832959		TMEM52B				0.923112	0.0117886	0.259029	Foralumab	0.259029
HSPA8	0.599383	0.0101325	0.886603				Untreated	0.886603		BBIP1	-0.925852	0.0144813	0.850179				Untreated	0.850179		PPP1R15A				0.675469	0.0118405	0.259389	Foralumab	0.259389
MAN2B1	0.774472	0.0105948	0.886603				Untreated	0.886603		IL6	-0.929059	0.0144799	0.850179				Untreated	0.850179		RB1CC1				0.910195	0.0119096	0.260121	Foralumab	0.260121
MVP	-0.570618	0.0108301	0.886603				Untreated	0.886603		DNAH8	-0.87406	0.0148668	0.854766				Untreated	0.854766		GGT1				-1.16787	0.0121995	0.264235	Foralumab	0.264235
NFIC	-0.742824	0.0108795	0.886603				Untreated	0.886603		NFS1	0.827933	0.0151155	0.854766				Untreated	0.854766		TBCE				-0.941244	0.0123104	0.264909	Foralumab	0.264909
REC8	-0.762607	0.00983322	0.886603				Untreated	0.886603		PURA	-0.898086	0.0152044	0.854766				Untreated	0.854766		TRAPPC4				0.983025	0.012415	0.266375	Foralumab	0.266375
SKIL	0.772238	0.0113871	0.886603				Untreated	0.886603		RPLP2	0.683325	0.0149372	0.854766				Untreated	0.854766		PSMD14				0.90222	0.0126243	0.267753	Foralumab	0.267753
SP1	-0.769294	0.0109612	0.886603				Untreated	0.886603		TMEM18	-0.814989	0.0150733	0.854766				Untreated	0.854766		ANKRD11				0.733595	0.0126727	0.267963	Foralumab	0.267963
TPM3	-0.433827	0.011141	0.886603				Untreated	0.886603		TRAFD1	-0.85212	0.0150299	0.854766				Untreated	0.854766		ELMO2				-0.971107	0.0127451	0.268076	Foralumab	0.268076
TRAPPC1	-0.794716	0.0098881	0.886603				Untreated	0.886603		CDK12	-0.740684	0.0155681	0.858602				Untreated	0.858602		IVNS1ABP				0.752216	0.0127515	0.268076	Foralumab	0.268076
UBL4A	0.783591	0.0113084	0.886603				Untreated	0.886603		CMTR1	-0.842025	0.0155587	0.858602				Untreated	0.858602		MT-ND4L				0.590349	0.0128033	0.26821	Foralumab	0.26821
ZNF480	0.747213	0.0111857	0.886603				Untreated	0.886603		CPNE3	0.886542	0.0159339	0.858602				Untreated	0.858602		TSR1				0.941214	0.0131523	0.272573	Foralumab	0.272573
ZNF441	0.778657	0.0116539	0.89028				Untreated	0.89028		FBXO25	0.818664	0.0159402	0.858602				Untreated	0.858602		METAP1				0.955705	0.0132293	0.27266	Foralumab	0.27266
SLC26A4	0.737211	0.0118162	0.895028				Untreated	0.895028		IGLV3-21	-0.899749	0.0158175	0.858602				Untreated	0.858602		PABPC4				0.833212	0.0133341	0.273237	Foralumab	0.273237
SYF2	0.622448	0.0119885	0.90045				Untreated	0.90045		INO80	0.783436	0.0158389	0.858602				Untreated	0.858602		TUT4				0.975414	0.0133022	0.273237	Foralumab	0.273237
AQR	0.720669	0.014826	0.909775				Untreated	0.909775		MRPL28	-0.864309	0.0160132	0.858602				Untreated	0.858602		KCTD12				-0.813832	0.0134423	0.273915	Foralumab	0.273915
BCL2A1	0.775048	0.0136177	0.909775				Untreated	0.909775		SMN1	0.920634	0.0156543	0.858602				Untreated	0.858602		FAM102B				0.933334	0.013564	0.275088	Foralumab	0.275088
BIRC2	0.71427	0.0147964	0.909775				Untreated	0.909775		KDM4C	-0.62541	0.016245	0.861077				Untreated	0.861077		RTCB				-0.843556	0.0135753	0.275088	Foralumab	0.275088
BORCS5	0.721272	0.0133051	0.909775				Untreated	0.909775		RABL2A	0.914082	0.0162054	0.861077				Untreated	0.861077		SLC1A2				-1.06071	0.0139925	0.281976	Foralumab	0.281976
C11orf1	0.658754	0.0135542	0.909775				Untreated	0.909775		C19orf54	-0.858903	0.0176773	0.862811				Untreated	0.862811		HAX1				-0.86631	0.0141268	0.283118	Foralumab	0.283118
CAPN7	-0.749839	0.0146009	0.909775				Untreated	0.909775		CLIP1	0.900203	0.017859	0.862811				Untreated	0.862811		TMED5				0.788403	0.0143154	0.286113	Foralumab	0.286113
CHP1	0.487432	0.0132201	0.909775				Untreated	0.909775		EZR	0.74485	0.01774	0.862811				Untreated	0.862811		ITPRID2				0.63226	0.0144907	0.288823	Foralumab	0.288823
CITED2	0.743968	0.0145961	0.909775				Untreated	0.909775		GNG2	0.859649	0.0177457	0.862811				Untreated	0.862811		EPB41L3				0.786757	0.0147126	0.292448	Foralumab	0.292448
CUL3	0.735999	0.0131818	0.909775				Untreated	0.909775		NFKB1	0.851884	0.0166497	0.862811				Untreated	0.862811		RNF152				0.820767	0.0149796	0.29534	Foralumab	0.29534
DEF6	0.733619	0.0138563	0.909775				Untreated	0.909775		OSBPL8	0.828849	0.017835	0.862811				Untreated	0.862811		CHMP1B				0.645625	0.0151523	0.297941	Foralumab	0.297941
DYNLRB1	-0.713116	0.0150601	0.909775				Untreated	0.909775		PLD5P1	0.898751	0.0170689	0.862811				Untreated	0.862811		BUD23				0.741746	0.015586	0.298938	Foralumab	0.298938
ELOB	-0.637922	0.013455	0.909775				Untreated	0.909775		PML	-0.821312	0.0171379	0.862811				Untreated	0.862811		MAPK13				1.02272	0.0154686	0.298938	Foralumab	0.298938
GTDC1	-0.714004	0.0137761	0.909775				Untreated	0.909775		PRR14	-0.903232	0.0170337	0.862811				Untreated	0.862811		MT-ND5				0.611349	0.0155941	0.298938	Foralumab	0.298938
IKZF2	-0.642692	0.0151897	0.909775				Untreated	0.909775		RANBP2	0.855277	0.0168422	0.862811				Untreated	0.862811		NAA25				0.994055	0.0155508	0.298938	Foralumab	0.298938
LMO7	-0.741859	0.0134767	0.909775				Untreated	0.909775		RASGRP3	-0.718032	0.017439	0.862811				Untreated	0.862811		PCMT1				-0.861115	0.0154702	0.298938	Foralumab	0.298938
NEDD1	0.727866	0.014774	0.909775				Untreated	0.909775		RBM28	0.809667	0.0172517	0.862811				Untreated	0.862811		USP10				0.817159	0.0155261	0.298938	Foralumab	0.298938
PHF11	-0.679162	0.0143488	0.909775				Untreated	0.909775		REL	0.582068	0.0165379	0.862811				Untreated	0.862811		SH3BP5				0.664831	0.0160229	0.304088	Foralumab	0.304088
PLEKHG2	0.705989	0.0127909	0.909775				Untreated	0.909775		RPS27A	0.686855	0.0173512	0.862811				Untreated	0.862811		TLNRD1				1.06544	0.0160677	0.304088	Foralumab	0.304088
PRKCD	-0.674356	0.0153699	0.909775				Untreated	0.909775		RUNX1	-0.886221	0.0177108	0.862811				Untreated	0.862811		ARL6IP4				0.646723	0.0162064	0.304553	Foralumab	0.304553
PRR13	-0.563893	0.0137801	0.909775				Untreated	0.909775		SCIN	0.893622	0.016805	0.862811				Untreated	0.862811		SPRY2				1.11423	0.01624	0.304553	Foralumab	0.304553
PURA	-0.758449	0.0126939	0.909775				Untreated	0.909775		TPCN1	-0.890956	0.0169081	0.862811				Untreated	0.862811		NRIP3				1.08462	0.0164966	0.307172	Foralumab	0.307172
SAT1	0.59781	0.015272	0.909775				Untreated	0.909775		KXD1	-0.707752	0.0179836	0.864333				Untreated	0.864333		GRK6				-0.81981	0.0167179	0.307797	Foralumab	0.307797
SCAMP1	0.75351	0.0144237	0.909775				Untreated	0.909775		CRIM1	0.807638	0.0190817	0.891989				Untreated	0.891989		CD180				-0.951067	0.0170534	0.31023	Foralumab	0.31023
TG	0.618119	0.0126124	0.909775				Untreated	0.909775		ECH1	-0.695313	0.0189799	0.891989				Untreated	0.891989		PHF20				-0.786183	0.0170956	0.31023	Foralumab	0.31023
TOP3A	0.735874	0.0152013	0.909775				Untreated	0.909775		IFITM2	-0.675968	0.0192322	0.891989				Untreated	0.891989		ABL1				1.01815	0.0173218	0.310292	Foralumab	0.310292
USP25	-0.741326	0.0150688	0.909775				Untreated	0.909775		IGLV4-3	-0.369156	0.0188119	0.891989				Untreated	0.891989		SLC26A2				0.884328	0.0174584	0.310292	Foralumab	0.310292
ZNF780A	0.744233	0.0141258	0.909775				Untreated	0.909775		MNDA	-0.909808	0.0188052	0.891989				Untreated	0.891989		STX1A				1.0426	0.0173957	0.310292	Foralumab	0.310292
ZNF799	-0.60328	0.0156054	0.916914				Untreated	0.916914		TNRC6A	0.844099	0.0192222	0.891989				Untreated	0.891989		TOMM34				0.981508	0.017422	0.310292	Foralumab	0.310292
BPGM	0.740686	0.0159073	0.923244				Untreated	0.923244		ZNF83	0.741499	0.0191265	0.891989				Untreated	0.891989		VPS29				-0.576702	0.0174819	0.310292	Foralumab	0.310292
IL1RAP	0.706782	0.0165264	0.952989				Untreated	0.952989		AK2	-0.738306	0.0200968	0.920328				Untreated	0.920328		DHRS1				-0.905198	0.0175506	0.310756	Foralumab	0.310756
ARHGDIA	-0.720845	0.0170849	0.953777				Untreated	0.953777		GNA12	0.865449	0.0200307	0.920328				Untreated	0.920328		PAICS				0.74894	0.0176667	0.312055	Foralumab	0.312055
CARS1	-0.682384	0.0171015	0.953777				Untreated	0.953777		KAT2A	-0.764968	0.0202401	0.920328				Untreated	0.920328		PIK3R4				-1.04427	0.0177672	0.312845	Foralumab	0.312845
HMG20A	-0.718703	0.0171804	0.953777				Untreated	0.953777		RPL22L1	0.798047	0.0201767	0.920328				Untreated	0.920328		ATP13A1				-0.842448	0.018478	0.317918	Foralumab	0.317918
MARF1	0.651605	0.0170484	0.953777				Untreated	0.953777		NMI	-0.878142	0.0206267	0.920733				Untreated	0.920733		TRIM24				0.967373	0.0188742	0.321726	Foralumab	0.321726
PELP1	0.726513	0.0171154	0.953777				Untreated	0.953777		PAWR	0.802896	0.0206343	0.920733				Untreated	0.920733		HMOX1				1.0505	0.0190727	0.32357	Foralumab	0.32357
TPCN1	0.724603	0.016665	0.953777				Untreated	0.953777		SMN2	-0.879717	0.020646	0.920733				Untreated	0.920733		C19orf25				0.92191	0.0196044	0.328083	Foralumab	0.328083
BCL6	0.725549	0.0174111	0.96062				Untreated	0.96062		USP24	0.690819	0.0205693	0.920733				Untreated	0.920733		ZMYM4				-1.07756	0.0195517	0.328083	Foralumab	0.328083
CHKA	0.733889	0.0176304	0.960855				Untreated	0.960855		NADK	-0.830449	0.0207599	0.921382				Untreated	0.921382		CRISPLD2				-0.844398	0.0196897	0.328688	Foralumab	0.328688
SRSF3	0.51662	0.0175246	0.960855				Untreated	0.960855		AHCYL2	0.863702	0.0210629	0.922796				Untreated	0.922796		NUP93				-0.920889	0.019744	0.328842	Foralumab	0.328842
GRM6	-0.749463	0.0177991	0.964173				Untreated	0.964173		BRIP1	0.842455	0.0215876	0.922796				Untreated	0.922796		ARID2				0.839634	0.0199529	0.328863	Foralumab	0.328863
NTPCR	-0.704075	0.0179275	0.965279				Untreated	0.965279		C2orf68	0.707559	0.0215338	0.922796				Untreated	0.922796		CHMP5				-0.871147	0.0199707	0.328863	Foralumab	0.328863
SLC10A3	0.740459	0.0184525	0.987597				Untreated	0.987597		ITGA4	-0.640154	0.0212131	0.922796				Untreated	0.922796		MT-CO3				0.733716	0.0199599	0.328863	Foralumab	0.328863
RESF1	0.640973	0.0185672	0.987817				Untreated	0.987817		NEDD8	-0.732253	0.021277	0.922796				Untreated	0.922796		ARHGEF3				-1.04808	0.0200469	0.32887	Foralumab	0.32887
CREM	0.627021	0.0190723	0.991012				Untreated	0.991012		SIGMAR1	-0.884144	0.0214175	0.922796				Untreated	0.922796		HELZ2				-0.918009	0.0201527	0.32887	Foralumab	0.32887
CTNND1	0.717231	0.0192284	0.991012				Untreated	0.991012		SLC9A9	0.881566	0.0212967	0.922796				Untreated	0.922796		RIN2				-0.814958	0.020171	0.32887	Foralumab	0.32887
ERN2	0.70966	0.0195836	0.991012				Untreated	0.991012		UBE2H	-0.794007	0.020987	0.922796				Untreated	0.922796		UBOX5				-0.829738	0.0200889	0.32887	Foralumab	0.32887
GABRG2	-0.675947	0.0193275	0.991012				Untreated	0.991012		RPS2	0.517531	0.0217033	0.923485				Untreated	0.923485		WDR7				0.955699	0.0201966	0.32887	Foralumab	0.32887
IAPP	0.715262	0.0196251	0.991012				Untreated	0.991012		EAF2	-0.831043	0.0223843	0.923735				Untreated	0.923735		HNRNPA2B1				0.548815	0.0205232	0.3305	Foralumab	0.3305
IL2RB	0.627267	0.0190979	0.991012				Untreated	0.991012		ELK3	0.85019	0.021967	0.923735				Untreated	0.923735		TJP2				0.84769	0.0209894	0.33505	Foralumab	0.33505
MGAT4C	-0.725502	0.0192872	0.991012				Untreated	0.991012		EOLA2	0.846755	0.0222943	0.923735				Untreated	0.923735		SLC44A2				-0.831557	0.0212677	0.33875	Foralumab	0.33875
NBPF9	-0.647164	0.0191115	0.991012				Untreated	0.991012		GCSAM	-0.871846	0.0226054	0.923735				Untreated	0.923735		ARL17B				-0.743368	0.0214008	0.338815	Foralumab	0.338815
SIRT5	-0.713453	0.0195647	0.991012				Untreated	0.991012		MYEF2	0.84777	0.0225177	0.923735				Untreated	0.923735		ETFB				-0.638198	0.0213337	0.338815	Foralumab	0.338815
BTBD2	-0.683647	0.0204276	0.997304				Untreated	0.997304		SMC2	0.8394	0.0223018	0.923735				Untreated	0.923735		GTPBP4				0.67599	0.021539	0.340101	Foralumab	0.340101
ITGA4	-0.492479	0.0204913	0.997304				Untreated	0.997304		TAP1	-0.594237	0.0219302	0.923735				Untreated	0.923735		DOCK4				1.05464	0.0217295	0.34166	Foralumab	0.34166
MSANTD4	0.721623	0.020081	0.997304				Untreated	0.997304		ZNF160	0.722685	0.0223901	0.923735				Untreated	0.923735		ZBTB17				0.730748	0.0218838	0.341847	Foralumab	0.341847
PSMB10	-0.565398	0.0204204	0.997304				Untreated	0.997304		ZNF808	-0.852701	0.0224592	0.923735				Untreated	0.923735		GEN1				-0.94366	0.0222006	0.34332	Foralumab	0.34332
PTCD3	0.705706	0.0203757	0.997304				Untreated	0.997304		DHX58	-0.865011	0.0227202	0.924354				Untreated	0.924354		TNFSF13B				-0.69563	0.0222134	0.34332	Foralumab	0.34332
TRIM44	-0.595202	0.0205308	0.997304				Untreated	0.997304		ARL6IP5	-0.783018	0.0228539	0.925732				Untreated	0.925732		TLR2				0.783653	0.0222882	0.343747	Foralumab	0.343747
CERK	0.614095	0.0211145	0.99868				Untreated	0.99868		ERP29	-0.596586	0.0231149	0.932235				Untreated	0.932235		ANAPC15				0.73494	0.0230136	0.347656	Foralumab	0.347656
HDAC4	0.70546	0.0207523	0.99868				Untreated	0.99868		PARN	-0.644404	0.0233462	0.937487				Untreated	0.937487		RGS1				1.04591	0.0229991	0.347656	Foralumab	0.347656
IFIT5	-0.715043	0.0210425	0.99868				Untreated	0.99868		FAM222B	-0.839669	0.023811	0.944307				Untreated	0.944307		TAGLN2				0.809843	0.0237361	0.357759	Foralumab	0.357759
NBPF14	0.702197	0.0208218	0.99868				Untreated	0.99868		MEAK7	-0.84326	0.0241006	0.944307				Untreated	0.944307		FCGR1B				-0.826601	0.0238503	0.358737	Foralumab	0.358737
SOCS3	0.710756	0.0211178	0.99868				Untreated	0.99868		MOCS2	-0.869247	0.0240337	0.944307				Untreated	0.944307		NUP58				0.73721	0.0241025	0.361786	Foralumab	0.361786
ABCB7	0.530395	0.0473359	0.99975				Untreated	0.99975		MYOZ3	0.864213	0.0240815	0.944307				Untreated	0.944307		FGL2				-0.817633	0.0246451	0.364362	Foralumab	0.364362
ABHD14A	-0.647807	0.0367345	0.99975				Untreated	0.99975		R3HDM1	-0.757871	0.0241268	0.944307				Untreated	0.944307		GPR65				-0.73158	0.0248735	0.364362	Foralumab	0.364362
ACTB	-0.337925	0.0253749	0.99975				Untreated	0.99975		RAB24	-0.670463	0.0237065	0.944307				Untreated	0.944307		GTF2H1				0.959112	0.0246965	0.364362	Foralumab	0.364362
AGPAT5	0.653235	0.0317278	0.99975				Untreated	0.99975		ADCY3	0.844736	0.0244156	0.947911				Untreated	0.947911		MSRB1				-0.907544	0.0247202	0.364362	Foralumab	0.364362
ALG12	-0.560458	0.0490143	0.99975				Untreated	0.99975		RCBTB1	-0.838792	0.0244233	0.947911				Untreated	0.947911		PDHA1				-0.804339	0.0245092	0.364362	Foralumab	0.364362
ALKBH2	-0.65954	0.0346244	0.99975				Untreated	0.99975		JPT2	0.853037	0.0246806	0.953905				Untreated	0.953905		RBCK1				-0.743511	0.0245491	0.364362	Foralumab	0.364362
ANK3	-0.665415	0.0238746	0.99975				Untreated	0.99975		GDAP2	0.674398	0.0248618	0.956922				Untreated	0.956922		SWSAP1				-0.774687	0.0248649	0.364362	Foralumab	0.364362
ANXA4	-0.614245	0.0499241	0.99975				Untreated	0.99975		AGTPBP1	0.794058	0.0262017	0.984541				Untreated	0.984541		ZNF395				1.01734	0.0249355	0.364538	Foralumab	0.364538
AOPEP	0.645356	0.0349073	0.99975				Untreated	0.99975		C4orf33	-0.786699	0.0287632	0.984541				Untreated	0.984541		MED17				-0.892949	0.025845	0.371077	Foralumab	0.371077
APPBP2	0.605914	0.046919	0.99975				Untreated	0.99975		CENPP	-0.786132	0.0277759	0.984541				Untreated	0.984541		OCIAD1				-0.767635	0.0258516	0.371077	Foralumab	0.371077
ARHGEF18	-0.521442	0.0390249	0.99975				Untreated	0.99975		CHMP4A	-0.784451	0.0262592	0.984541				Untreated	0.984541		PMM2				0.895766	0.0258596	0.371077	Foralumab	0.371077
ARID1B	-0.613551	0.0439201	0.99975				Untreated	0.99975		CYSLTR1	-0.811568	0.0270694	0.984541				Untreated	0.984541		SSH1				0.805101	0.0256065	0.371077	Foralumab	0.371077
ARRDC2	0.508451	0.0420736	0.99975				Untreated	0.99975		EHBP1	-0.830616	0.0276898	0.984541				Untreated	0.984541		ASPH				0.998189	0.0261913	0.372447	Foralumab	0.372447
ASAP1	0.613647	0.0465594	0.99975				Untreated	0.99975		FOXN3	-0.828079	0.0265804	0.984541				Untreated	0.984541		GM2A				-0.556211	0.0263669	0.373488	Foralumab	0.373488
ATP2B1	-0.583406	0.0410354	0.99975				Untreated	0.99975		IGLC2	-0.74829	0.0279524	0.984541				Untreated	0.984541		CYB5R1				-0.822422	0.0268072	0.378989	Foralumab	0.378989
ATP5IF1	-0.47548	0.0453789	0.99975				Untreated	0.99975		IL2RA	0.827278	0.0280954	0.984541				Untreated	0.984541		CSDE1				0.798092	0.0270126	0.381155	Foralumab	0.381155
ATP5MK	-0.59045	0.0479133	0.99975				Untreated	0.99975		INTS9	-0.816259	0.0286691	0.984541				Untreated	0.984541		DNAI4				-0.886438	0.0274008	0.383664	Foralumab	0.383664
ATPAF2	0.682384	0.0258344	0.99975				Untreated	0.99975		KLF13	-0.80827	0.0273903	0.984541				Untreated	0.984541		POLR2B				-0.694425	0.0273546	0.383664	Foralumab	0.383664
ATRX	0.469577	0.0443144	0.99975				Untreated	0.99975		MKLN1	0.632589	0.0274574	0.984541				Untreated	0.984541		RCSD1				-0.95639	0.0275259	0.384678	Foralumab	0.384678
BLOC1S1	-0.636559	0.0377544	0.99975				Untreated	0.99975		PAK1	0.72658	0.0286973	0.984541				Untreated	0.984541		MARF1				0.846232	0.027796	0.386969	Foralumab	0.386969
BRCC3	-0.671967	0.0230584	0.99975				Untreated	0.99975		PALS2	-0.804292	0.0260154	0.984541				Untreated	0.984541		TMPO				-0.793775	0.0277684	0.386969	Foralumab	0.386969
C12orf4	0.583552	0.044297	0.99975				Untreated	0.99975		PRMT3	0.830679	0.0285247	0.984541				Untreated	0.984541		GAB3				0.693243	0.0280715	0.388256	Foralumab	0.388256
CAND1	0.5081	0.0465323	0.99975				Untreated	0.99975		RNF214	-0.83023	0.0274338	0.984541				Untreated	0.984541		MT-ND1				0.551192	0.0279854	0.388256	Foralumab	0.388256
CCAR1	0.489289	0.0264831	0.99975				Untreated	0.99975		SDF2	-0.818442	0.0260267	0.984541				Untreated	0.984541		PTPN1				0.671971	0.0280165	0.388256	Foralumab	0.388256
CCDC93	0.541996	0.0294373	0.99975				Untreated	0.99975		SMG7	-0.785581	0.0277326	0.984541				Untreated	0.984541		LUC7L3				0.649505	0.0281734	0.388516	Foralumab	0.388516
CCDC97	0.610457	0.0428717	0.99975				Untreated	0.99975		TPT1	0.567853	0.0270819	0.984541				Untreated	0.984541		NOMO2				-0.778234	0.0283839	0.389372	Foralumab	0.389372
CD46	0.462153	0.0496397	0.99975				Untreated	0.99975		TRIM34	-0.817782	0.0279231	0.984541				Untreated	0.984541		USP38				0.782953	0.0283956	0.389372	Foralumab	0.389372
CD74	0.346628	0.0463101	0.99975				Untreated	0.99975		UMPS	0.809283	0.0283857	0.984541				Untreated	0.984541		ASCC3				-0.828345	0.0285319	0.390507	Foralumab	0.390507
CEP164	0.64238	0.0360555	0.99975				Untreated	0.99975		ZBP1	-0.759029	0.0287635	0.984541				Untreated	0.984541		JAK1				0.547147	0.0286341	0.391172	Foralumab	0.391172
CHURC1	-0.514088	0.0310173	0.99975				Untreated	0.99975		ZNF18	-0.8083	0.0265353	0.984541				Untreated	0.984541		ARHGAP31				0.871564	0.0288266	0.391601	Foralumab	0.391601
CLK2	-0.661504	0.0325708	0.99975				Untreated	0.99975		ZNF621	0.657587	0.0285478	0.984541				Untreated	0.984541		CAMTA2				0.869919	0.0287849	0.391601	Foralumab	0.391601
CLOCK	0.658885	0.028331	0.99975				Untreated	0.99975		ZNF862	0.784234	0.0275677	0.984541				Untreated	0.984541		FAM210A				0.795007	0.028955	0.392615	Foralumab	0.392615
COLGALT1	-0.533375	0.0427768	0.99975				Untreated	0.99975		ACAD11	0.767274	0.0299724	0.984763				Untreated	0.984763		CCAR2				-0.785527	0.0290184	0.392745	Foralumab	0.392745
COX5A	-0.644276	0.0241071	0.99975				Untreated	0.99975		ACADM	-0.793931	0.029546	0.984763				Untreated	0.984763		PDK1				0.863563	0.0294035	0.39538	Foralumab	0.39538
CTNNA1	0.645165	0.0278494	0.99975				Untreated	0.99975		AMD1	0.682692	0.0307887	0.984763				Untreated	0.984763		ACSL3				0.885351	0.0295426	0.396164	Foralumab	0.396164
CTSB	0.461591	0.0493702	0.99975				Untreated	0.99975		ARF3	-0.802932	0.0303138	0.984763				Untreated	0.984763		ELK3				0.811157	0.0297109	0.396714	Foralumab	0.396714
CXCR6	0.699274	0.0249342	0.99975				Untreated	0.99975		BTBD2	-0.835607	0.0295148	0.984763				Untreated	0.984763		TEN1				0.738447	0.0296977	0.396714	Foralumab	0.396714
DDIT4	0.550633	0.0362173	0.99975				Untreated	0.99975		DNAI4	-0.824266	0.0293496	0.984763				Untreated	0.984763		UNC45A				-0.831637	0.0298562	0.396722	Foralumab	0.396722
DENND4C	-0.548164	0.04574	0.99975				Untreated	0.99975		ENPP1	0.815503	0.0310746	0.984763				Untreated	0.984763		GPATCH3				-0.793176	0.0299149	0.396781	Foralumab	0.396781
DMXL1	0.602494	0.0434662	0.99975				Untreated	0.99975		ERBB2	-0.689064	0.0310873	0.984763				Untreated	0.984763		ARL6IP5				-0.820578	0.0300927	0.396973	Foralumab	0.396973
DNAJC13	-0.634072	0.0345707	0.99975				Untreated	0.99975		FOXRED1	-0.823901	0.0311075	0.984763				Untreated	0.984763		LMBR1				-0.789502	0.0300795	0.396973	Foralumab	0.396973
DNAJC4	-0.600499	0.0443275	0.99975				Untreated	0.99975		FYTTD1	0.726949	0.0290911	0.984763				Untreated	0.984763		LRRFIP2				0.749252	0.0303567	0.398948	Foralumab	0.398948
DNMT3A	-0.673948	0.0266985	0.99975				Untreated	0.99975		NEDD9	-0.726025	0.0311333	0.984763				Untreated	0.984763		RAP2C				0.800809	0.0304972	0.398948	Foralumab	0.398948
DROSHA	-0.667772	0.0294678	0.99975				Untreated	0.99975		NOP53	0.741433	0.0303079	0.984763				Untreated	0.984763		SLMAP				-0.670471	0.0305574	0.398948	Foralumab	0.398948
DXO	-0.626087	0.0416828	0.99975				Untreated	0.99975		ORMDL1	-0.611275	0.0291145	0.984763				Untreated	0.984763		FOXK2				0.879468	0.0308647	0.399925	Foralumab	0.399925
ECE1	0.598396	0.0262959	0.99975				Untreated	0.99975		PDZD8	0.810356	0.0296683	0.984763				Untreated	0.984763		SLFN11				-0.717524	0.0308109	0.399925	Foralumab	0.399925
EIF2B4	0.675047	0.0301358	0.99975				Untreated	0.99975		PIK3R4	-0.810958	0.0298513	0.984763				Untreated	0.984763		ALOX5AP				0.999591	0.0310374	0.400739	Foralumab	0.400739
EIF3M	0.463759	0.0424575	0.99975				Untreated	0.99975		PLXNA1	0.828772	0.0304596	0.984763				Untreated	0.984763		AP1G1				-0.724028	0.0310226	0.400739	Foralumab	0.400739
EIF5A	-0.510849	0.046798	0.99975				Untreated	0.99975		RPL9	0.590844	0.0302296	0.984763				Untreated	0.984763		CRY1				0.929669	0.0311067	0.400924	Foralumab	0.400924
ENTPD4	0.52201	0.0408539	0.99975				Untreated	0.99975		SAMD9	-0.772328	0.02933	0.984763				Untreated	0.984763		H2AJ				-0.756446	0.0311849	0.401223	Foralumab	0.401223
FAM177A1	0.583812	0.0231424	0.99975				Untreated	0.99975		TNRC6B	0.588078	0.0305024	0.984763				Untreated	0.984763		FAM126A				0.683543	0.031327	0.401635	Foralumab	0.401635
FAM91A1	0.638867	0.0372578	0.99975				Untreated	0.99975		TOR3A	-0.778397	0.0297471	0.984763				Untreated	0.984763		HMGN4				-0.722447	0.0313036	0.401635	Foralumab	0.401635
FBXO44	-0.610495	0.0429572	0.99975				Untreated	0.99975		ZNF350	-0.774379	0.0312118	0.984763				Untreated	0.984763		FOSL2				0.670674	0.0316193	0.402058	Foralumab	0.402058
FBXO6	-0.651298	0.036158	0.99975				Untreated	0.99975		ZNF662	0.826978	0.0312081	0.984763				Untreated	0.984763		RUBCN				-0.710725	0.0316356	0.402058	Foralumab	0.402058
FTO	-0.487741	0.0274128	0.99975				Untreated	0.99975		CHMP5	-0.790554	0.0314756	0.986378				Untreated	0.986378		KDM6A				0.77855	0.0321404	0.40643	Foralumab	0.40643
G2E3	-0.587047	0.0498917	0.99975				Untreated	0.99975		STAT2	-0.610044	0.0313977	0.986378				Untreated	0.986378		SLC38A10				-0.751909	0.0321799	0.40643	Foralumab	0.40643
GABARAPL1	0.542773	0.0314824	0.99975				Untreated	0.99975		CMTR2	-0.813507	0.0318129	0.993591				Untreated	0.993591		SLC36A1				-0.797783	0.0324928	0.407977	Foralumab	0.407977
GCNT2	0.647859	0.0355428	0.99975				Untreated	0.99975		ATP2B4	-0.765848	0.0320502	0.997643				Untreated	0.997643		DPP9				-0.610964	0.0334423	0.415608	Foralumab	0.415608
GEN1	0.617573	0.042968	0.99975				Untreated	0.99975		ABCG1	0.745347	0.0326301	0.999923				Untreated	0.999923		EIF4A1				0.514412	0.0333522	0.415608	Foralumab	0.415608
GPSM2	0.599767	0.0477041	0.99975				Untreated	0.99975		ALDH3A2	-0.779181	0.0396372	0.999923				Untreated	0.999923		ARID3B				0.767181	0.0337679	0.418229	Foralumab	0.418229
GZMA	-0.590297	0.0230046	0.99975				Untreated	0.99975		ANKRD11	0.554621	0.0455081	0.999923				Untreated	0.999923		QTRT2				0.758361	0.0338269	0.41825	Foralumab	0.41825
HARS2	0.539739	0.0308519	0.99975				Untreated	0.99975		AQP3	-0.786143	0.0395261	0.999923				Untreated	0.999923		GNL3				0.862963	0.0340183	0.418726	Foralumab	0.418726
HEMK1	-0.56404	0.0327085	0.99975				Untreated	0.99975		ARHGAP27	-0.561524	0.0481965	0.999923				Untreated	0.999923		GYPC				0.977638	0.0340376	0.418726	Foralumab	0.418726
HMBOX1	-0.586819	0.0315387	0.99975				Untreated	0.99975		ARHGAP5	0.75072	0.0459613	0.999923				Untreated	0.999923		VCP				0.671877	0.0339521	0.418726	Foralumab	0.418726
HMGN2	-0.352983	0.0428585	0.99975				Untreated	0.99975		ARHGEF3	-0.757351	0.0338257	0.999923				Untreated	0.999923		CLCN5				-0.928532	0.0344431	0.420171	Foralumab	0.420171
HNRNPU	-0.434614	0.0274565	0.99975				Untreated	0.99975		ARRDC2	0.654596	0.0429046	0.999923				Untreated	0.999923		ITPRIP				0.62782	0.0343749	0.420171	Foralumab	0.420171
HRH4	0.626141	0.0396154	0.99975				Untreated	0.99975		ARSG	0.734061	0.0411382	0.999923				Untreated	0.999923		TRAPPC6A				0.818567	0.0345053	0.420227	Foralumab	0.420227
HSPA1B	0.26274	0.0320523	0.99975				Untreated	0.99975		ATG4A	-0.780226	0.0449517	0.999923				Untreated	0.999923		PRDM2				0.623225	0.0348205	0.423359	Foralumab	0.423359
IFITM2	-0.484838	0.0388509	0.99975				Untreated	0.99975		AZI2	-0.768172	0.0437652	0.999923				Untreated	0.999923		CCNH				0.719779	0.0350086	0.424806	Foralumab	0.424806
IFT57	0.599279	0.0466139	0.99975				Untreated	0.99975		B4GALT5	0.804147	0.0366892	0.999923				Untreated	0.999923		SLC46A2				-0.924305	0.035056	0.424806	Foralumab	0.424806
IFT74	-0.67403	0.0313656	0.99975				Untreated	0.99975		BAZ1A	0.775997	0.0389936	0.999923				Untreated	0.999923		MCL1				0.497818	0.0353318	0.425477	Foralumab	0.425477
IGKC	0.673215	0.028789	0.99975				Untreated	0.99975		BIRC2	0.703548	0.0356366	0.999923				Untreated	0.999923		MGAT4A				0.97259	0.0354753	0.425477	Foralumab	0.425477
IL4R	0.638182	0.0221071	0.99975				Untreated	0.99975		BRCA1	0.690325	0.0449068	0.999923				Untreated	0.999923		RPP14				0.553977	0.0354395	0.425477	Foralumab	0.425477
INTS6	0.600603	0.0267788	0.99975				Untreated	0.99975		C10orf143	0.723999	0.0490008	0.999923				Untreated	0.999923		SEC23IP				-0.765597	0.0356818	0.425477	Foralumab	0.425477
INVS	-0.624562	0.0433077	0.99975				Untreated	0.99975		CALCOCO2	-0.610262	0.0472076	0.999923				Untreated	0.999923		TCEA1				0.754934	0.0356946	0.425477	Foralumab	0.425477
IVNS1ABP	0.588344	0.0371294	0.99975				Untreated	0.99975		CARMIL1	0.777689	0.036265	0.999923				Untreated	0.999923		UFM1				0.698286	0.0352724	0.425477	Foralumab	0.425477
KDM2B	0.659253	0.0230516	0.99975				Untreated	0.99975		CCDC198	0.763946	0.0395211	0.999923				Untreated	0.999923		CUL1				-0.833218	0.035756	0.425513	Foralumab	0.425513
KDM5C	0.586204	0.0430266	0.99975				Untreated	0.99975		CCM2	-0.710811	0.0373035	0.999923				Untreated	0.999923		CCDC124				0.713159	0.0363553	0.430539	Foralumab	0.430539
LPIN2	0.610568	0.0412339	0.99975				Untreated	0.99975		CCNT1	0.685634	0.04244	0.999923				Untreated	0.999923		LARP1				-0.681757	0.0365337	0.431951	Foralumab	0.431951
LRBA	0.480056	0.0443963	0.99975				Untreated	0.99975		CDK6	-0.760119	0.0456601	0.999923				Untreated	0.999923		PSMB8				-0.649911	0.036623	0.432305	Foralumab	0.432305
LRRFIP2	-0.628285	0.0409811	0.99975				Untreated	0.99975		CHD6	0.72055	0.0378649	0.999923				Untreated	0.999923		TBC1D20				-0.685438	0.0367513	0.43242	Foralumab	0.43242
MAF1	-0.605709	0.0492618	0.99975				Untreated	0.99975		CLDN11	0.755121	0.0446384	0.999923				Untreated	0.999923		RAB10				-0.706409	0.0368164	0.432489	Foralumab	0.432489
MARCHF7	0.575051	0.0427639	0.99975				Untreated	0.99975		CLUAP1	0.682322	0.0453184	0.999923				Untreated	0.999923		PAPSS2				0.929404	0.0369432	0.432586	Foralumab	0.432586
MBNL3	-0.614541	0.043506	0.99975				Untreated	0.99975		COX15	-0.775879	0.0345312	0.999923				Untreated	0.999923		PURB				0.60976	0.0369275	0.432586	Foralumab	0.432586
MCM6	0.538829	0.0443624	0.99975				Untreated	0.99975		CTNNA3	0.217831	0.0439642	0.999923				Untreated	0.999923		ATP6V1F				0.773494	0.0370472	0.433107	Foralumab	0.433107
MED13L	-0.536327	0.0247302	0.99975				Untreated	0.99975		CYP2R1	0.770049	0.0427658	0.999923				Untreated	0.999923		SAFB				0.761817	0.0374175	0.434249	Foralumab	0.434249
MEF2A	0.608485	0.0348937	0.99975				Untreated	0.99975		DCAF17	-0.736305	0.0395626	0.999923				Untreated	0.999923		SLX4IP				0.895247	0.0374186	0.434249	Foralumab	0.434249
MIER2	0.427336	0.0398587	0.99975				Untreated	0.99975		DMAC1	-0.826091	0.0336536	0.999923				Untreated	0.999923		VAMP2				-0.859998	0.0374425	0.434249	Foralumab	0.434249
MKNK1	0.626189	0.0301318	0.99975				Untreated	0.99975		DNMBP	0.804515	0.0329992	0.999923				Untreated	0.999923		VTA1				-0.830736	0.0373816	0.434249	Foralumab	0.434249
MPV17L	0.514907	0.0408483	0.99975				Untreated	0.99975		DPP8	-0.669088	0.0436941	0.999923				Untreated	0.999923		CALCOCO1				-0.853447	0.0375109	0.434353	Foralumab	0.434353
MRPL28	-0.680358	0.021271	0.99975				Untreated	0.99975		DYRK2	0.768819	0.0340872	0.999923				Untreated	0.999923		CDKL5				-0.932959	0.0376328	0.435073	Foralumab	0.435073
MTX2	-0.624791	0.0445665	0.99975				Untreated	0.99975		EEF1B2	0.648311	0.03426	0.999923				Untreated	0.999923		CBLB				0.949003	0.037917	0.436468	Foralumab	0.436468
NCAPH2	0.644018	0.021858	0.99975				Untreated	0.99975		EEF1E1	0.70402	0.0479236	0.999923				Untreated	0.999923		PRPF4B				0.658147	0.0378606	0.436468	Foralumab	0.436468
NCBP2AS2	-0.593017	0.0409249	0.99975				Untreated	0.99975		EIF4ENIF1	-0.751189	0.0413577	0.999923				Untreated	0.999923		RFXANK				-0.891461	0.0379928	0.436468	Foralumab	0.436468
NFE2L1	0.575737	0.0443184	0.99975				Untreated	0.99975		EMILIN2	0.727346	0.0374227	0.999923				Untreated	0.999923		TNRC6A				-0.835375	0.0380986	0.436995	Foralumab	0.436995
NIN	-0.663094	0.026534	0.99975				Untreated	0.99975		EZH1	0.585989	0.0484692	0.999923				Untreated	0.999923		TTC17				-0.792053	0.0383979	0.439048	Foralumab	0.439048
NIP7	0.582118	0.0448053	0.99975				Untreated	0.99975		FBXO42	-0.711177	0.0387424	0.999923				Untreated	0.999923		MED1				-0.758149	0.0386381	0.441103	Foralumab	0.441103
NIPA1	-0.620683	0.0415327	0.99975				Untreated	0.99975		FCGBP	-0.765665	0.0444213	0.999923				Untreated	0.999923		ADAM9				0.706227	0.0388763	0.442438	Foralumab	0.442438
NLE1	-0.674494	0.0271854	0.99975				Untreated	0.99975		FTH1	0.660972	0.0390601	0.999923				Untreated	0.999923		DENND3				-0.738795	0.0390109	0.442589	Foralumab	0.442589
NRBP1	0.408583	0.0492747	0.99975				Untreated	0.99975		GBP1	-0.772837	0.0456717	0.999923				Untreated	0.999923		ARHGAP45				-0.678204	0.0390985	0.44276	Foralumab	0.44276
NXF1	0.510344	0.0403871	0.99975				Untreated	0.99975		GLDC	-0.773811	0.0358017	0.999923				Untreated	0.999923		STK24				0.730868	0.0391474	0.44276	Foralumab	0.44276
OLA1	0.596128	0.0405799	0.99975				Untreated	0.99975		GTF2H1	-0.754363	0.0330312	0.999923				Untreated	0.999923		MPV17L				-0.563597	0.0393129	0.443943	Foralumab	0.443943
OXSM	-0.651402	0.0347732	0.99975				Untreated	0.99975		HACD4	-0.725071	0.034938	0.999923				Untreated	0.999923		PLEKHG2				0.768555	0.0395793	0.446261	Foralumab	0.446261
PALB2	-0.563857	0.0409056	0.99975				Untreated	0.99975		IFT172	0.714798	0.0364061	0.999923				Untreated	0.999923		FGFRL1				0.77671	0.0397424	0.44672	Foralumab	0.44672
PATL2	-0.692317	0.0249502	0.99975				Untreated	0.99975		IGHV2-70	-0.504723	0.0369078	0.999923				Untreated	0.999923						-0.563186	0.0400886	0.449917	Foralumab	0.449917
PDE4DIP	0.581315	0.0388804	0.99975				Untreated	0.99975		IGHV3-64D	-0.751756	0.0366878	0.999923				Untreated	0.999923		BRPF1				-0.734997	0.0404579	0.450155	Foralumab	0.450155
PEX2	-0.544742	0.0499374	0.99975				Untreated	0.99975		IQCG	0.796874	0.0343601	0.999923				Untreated	0.999923		PPM1L				0.884956	0.0405606	0.450155	Foralumab	0.450155
PGAP6	-0.603579	0.0493476	0.99975				Untreated	0.99975		IRF1	-0.524472	0.0486724	0.999923				Untreated	0.999923		PSMB10				-0.595903	0.0401727	0.450155	Foralumab	0.450155
PGM3	0.629566	0.0396349	0.99975				Untreated	0.99975		IVNS1ABP	-0.663297	0.0498701	0.999923				Untreated	0.999923		S100A10				0.686555	0.0404636	0.450155	Foralumab	0.450155
PLCB2	-0.579978	0.0339357	0.99975				Untreated	0.99975		KLHL28	-0.684629	0.0349441	0.999923				Untreated	0.999923		TRMT6				0.668733	0.0406652	0.450155	Foralumab	0.450155
PLCG2	-0.584141	0.0476098	0.99975				Untreated	0.99975		LLGL2	-0.771572	0.0347381	0.999923				Untreated	0.999923		ZNF292				-0.67859	0.0406076	0.450155	Foralumab	0.450155
PLXND1	0.616163	0.0425899	0.99975				Untreated	0.99975		LPCAT1	0.794541	0.0368692	0.999923				Untreated	0.999923		COPG1				-0.722341	0.0407745	0.450609	Foralumab	0.450609
POU2F2	-0.585374	0.0290472	0.99975				Untreated	0.99975		LYRM4	0.648515	0.0429132	0.999923				Untreated	0.999923		SRSF6				0.572902	0.0408297	0.450609	Foralumab	0.450609
PRC1	0.568998	0.0440445	0.99975				Untreated	0.99975		MACC1	-0.770784	0.0363069	0.999923				Untreated	0.999923		BLOC1S5				-0.939707	0.0414117	0.450882	Foralumab	0.450882
PRR19	0.66557	0.029097	0.99975				Untreated	0.99975		MAST3	-0.581078	0.0323998	0.999923				Untreated	0.999923		CPT2				-0.806038	0.0409301	0.450882	Foralumab	0.450882
PVR	0.600205	0.0439939	0.99975				Untreated	0.99975		MLLT10	0.755036	0.0398079	0.999923				Untreated	0.999923		GORASP1				-0.833089	0.0411467	0.450882	Foralumab	0.450882
RAB11FIP4	-0.631319	0.0373884	0.99975				Untreated	0.99975		MMS19	0.715727	0.0424043	0.999923				Untreated	0.999923		HBP1				0.578703	0.0411697	0.450882	Foralumab	0.450882
RAB8B	0.643793	0.0223825	0.99975				Untreated	0.99975		MOV10	-0.77641	0.0345203	0.999923				Untreated	0.999923		JOSD1				0.579479	0.0412504	0.450882	Foralumab	0.450882
RASA2	0.698585	0.0226334	0.99975				Untreated	0.99975		MTG1	-0.682097	0.0340896	0.999923				Untreated	0.999923		MGA				0.730891	0.0411362	0.450882	Foralumab	0.450882
RBSN	0.52893	0.0372622	0.99975				Untreated	0.99975		MTSS1	0.532265	0.047926	0.999923				Untreated	0.999923		MYADM				0.595948	0.0410401	0.450882	Foralumab	0.450882
REST	0.562959	0.0396421	0.99975				Untreated	0.99975		MTX2	-0.755977	0.0463177	0.999923				Untreated	0.999923		INAFM2				0.84388	0.0423539	0.458415	Foralumab	0.458415
REV3L	0.615857	0.0306595	0.99975				Untreated	0.99975		MZF1	0.750714	0.0439496	0.999923				Untreated	0.999923		EVL				-0.850763	0.0430853	0.459514	Foralumab	0.459514
RGL2	-0.703705	0.024196	0.99975				Untreated	0.99975		NEDD4L	-0.781725	0.0324063	0.999923				Untreated	0.999923		IRF3				-0.695735	0.0427432	0.459514	Foralumab	0.459514
RIC8A	0.510099	0.0364718	0.99975				Untreated	0.99975		NEIL2	-0.764339	0.0435989	0.999923				Untreated	0.999923		PNPLA8				0.676871	0.0429659	0.459514	Foralumab	0.459514
RIOK3	0.487219	0.0440034	0.99975				Untreated	0.99975		NINJ1	0.77332	0.0405339	0.999923				Untreated	0.999923		POM121C				0.761394	0.0429549	0.459514	Foralumab	0.459514
RTTN	0.677464	0.0269984	0.99975				Untreated	0.99975		NT5C3A	-0.652118	0.0491861	0.999923				Untreated	0.999923		RAB9A				-0.843546	0.0430484	0.459514	Foralumab	0.459514
RUFY2	0.612329	0.0480308	0.99975				Untreated	0.99975		NUCKS1	0.581934	0.0482972	0.999923				Untreated	0.999923		REXO1				0.821308	0.0426285	0.459514	Foralumab	0.459514
SCAMP4	0.645668	0.0375043	0.99975				Untreated	0.99975		OCIAD1	0.685653	0.0413133	0.999923				Untreated	0.999923		PPIL2				0.613616	0.0432858	0.460439	Foralumab	0.460439
SDHD	0.563474	0.0329427	0.99975				Untreated	0.99975		OTUD5	0.669371	0.049976	0.999923				Untreated	0.999923		WASHC3				-0.792916	0.0432983	0.460439	Foralumab	0.460439
SEC14L2	0.595084	0.0326845	0.99975				Untreated	0.99975		PARP10	-0.784243	0.0416027	0.999923				Untreated	0.999923		CLK1				0.479347	0.0439977	0.465839	Foralumab	0.465839
SERPINB9	0.486437	0.026656	0.99975				Untreated	0.99975		PCSK5	0.759826	0.0377085	0.999923				Untreated	0.999923		ST3GAL6				0.77315	0.0439607	0.465839	Foralumab	0.465839
SHLD1	-0.654945	0.0280681	0.99975				Untreated	0.99975		PELP1	0.730037	0.0417418	0.999923				Untreated	0.999923		WDR73				0.64348	0.0443186	0.467879	Foralumab	0.467879
SHPRH	-0.613163	0.0392103	0.99975				Untreated	0.99975		PHAF1	0.793727	0.033967	0.999923				Untreated	0.999923		WDR17				0.851916	0.0448828	0.472241	Foralumab	0.472241
SLA	0.451318	0.0227579	0.99975				Untreated	0.99975		PHF20	0.625123	0.0345589	0.999923				Untreated	0.999923		ZSWIM8				-0.751025	0.0448147	0.472241	Foralumab	0.472241
SLC25A1	-0.670335	0.0262772	0.99975				Untreated	0.99975		PIK3AP1	-0.632322	0.0439875	0.999923				Untreated	0.999923		MT-CO2				0.513613	0.0450392	0.47275	Foralumab	0.47275
SLC25A11	-0.645442	0.0374416	0.99975				Untreated	0.99975		PLEKHG2	0.75676	0.0354784	0.999923				Untreated	0.999923		HIVEP3				0.788216	0.0453104	0.472874	Foralumab	0.472874
SLC31A1	0.575163	0.0454892	0.99975				Untreated	0.99975		PLXNC1	0.7288	0.0481155	0.999923				Untreated	0.999923		RNF167				-0.693869	0.0460996	0.478373	Foralumab	0.478373
SLFN11	0.636088	0.0397472	0.99975				Untreated	0.99975		PNO1	0.627459	0.0456582	0.999923				Untreated	0.999923		ARHGEF10L				-0.708048	0.0463058	0.47915	Foralumab	0.47915
SMAD2	-0.529937	0.0445696	0.99975				Untreated	0.99975		PPID	-0.75656	0.0346232	0.999923				Untreated	0.999923		MYH10				-0.84912	0.0462862	0.47915	Foralumab	0.47915
SMG6	0.588779	0.0417759	0.99975				Untreated	0.99975		PPP1R12B	0.72704	0.0462442	0.999923				Untreated	0.999923		ZNF655				0.676283	0.0464662	0.480129	Foralumab	0.480129
SOS2	0.679929	0.0294513	0.99975				Untreated	0.99975		PTPN6	-0.561503	0.0341612	0.999923				Untreated	0.999923		CNIH1				0.831014	0.046619	0.480347	Foralumab	0.480347
SPAG16	-0.608151	0.0400982	0.99975				Untreated	0.99975		RAC2	-0.592561	0.0463001	0.999923				Untreated	0.999923		UPB1				0.848399	0.0465716	0.480347	Foralumab	0.480347
STMP1	-0.582708	0.0427143	0.99975				Untreated	0.99975		RALA	0.73671	0.0459057	0.999923				Untreated	0.999923		DUSP2				0.6464	0.0469107	0.481991	Foralumab	0.481991
TAF1D	-0.489279	0.0376659	0.99975				Untreated	0.99975		RALGPS2	-0.657617	0.0477837	0.999923				Untreated	0.999923		MYO9B				0.695893	0.0469096	0.481991	Foralumab	0.481991
TERF2	-0.643827	0.0254626	0.99975				Untreated	0.99975		RBBP4	-0.542825	0.0449313	0.999923				Untreated	0.999923		CDC42				0.442496	0.047134	0.48291	Foralumab	0.48291
TMBIM1	0.560407	0.0232086	0.99975				Untreated	0.99975		RBM15	-0.730199	0.0469401	0.999923				Untreated	0.999923		KLF11				-0.605853	0.0472992	0.48326	Foralumab	0.48326
TMSB10	-0.383444	0.0313315	0.99975				Untreated	0.99975		RPL13	0.616674	0.0353408	0.999923				Untreated	0.999923		CORO2A				-0.689774	0.0475247	0.483632	Foralumab	0.483632
TOB1	0.567835	0.0446818	0.99975				Untreated	0.99975		RPL23	0.574967	0.0409256	0.999923				Untreated	0.999923		GNA12				0.75271	0.0475345	0.483632	Foralumab	0.483632
TRAPPC2L	-0.578565	0.0313419	0.99975				Untreated	0.99975		RPL27	0.568877	0.0423907	0.999923				Untreated	0.999923		KANSL3				0.696516	0.0475067	0.483632	Foralumab	0.483632
TRIM59	0.606256	0.0232183	0.99975				Untreated	0.99975		RPL37	0.551455	0.0428944	0.999923				Untreated	0.999923		PLK3				0.581303	0.0476818	0.483781	Foralumab	0.483781
TRIOBP	-0.668942	0.0263266	0.99975				Untreated	0.99975		RPL4	0.625189	0.0338375	0.999923				Untreated	0.999923		LILRA5				-0.694573	0.0478671	0.484987	Foralumab	0.484987
TRIP11	0.691189	0.0237067	0.99975				Untreated	0.99975		RPS14	0.552109	0.0444887	0.999923				Untreated	0.999923		KDM2B				0.794258	0.0484711	0.487641	Foralumab	0.487641
TRMO	-0.597444	0.0378365	0.99975				Untreated	0.99975		RPS28	0.557888	0.0422203	0.999923				Untreated	0.999923		MKRN1				0.684161	0.048381	0.487641	Foralumab	0.487641
TRMT1	-0.496559	0.0496243	0.99975				Untreated	0.99975		RPS29	0.539009	0.0437216	0.999923				Untreated	0.999923		P2RY8				0.782388	0.0484421	0.487641	Foralumab	0.487641
TSTD1	-0.587106	0.0371788	0.99975				Untreated	0.99975		RPS3A	0.603023	0.0349341	0.999923				Untreated	0.999923		SPRYD3				-0.767055	0.0484235	0.487641	Foralumab	0.487641
TSTD2	0.604764	0.0458063	0.99975				Untreated	0.99975		RRAGC	0.761049	0.0482586	0.999923				Untreated	0.999923		TMEM71				-0.784239	0.0485301	0.487641	Foralumab	0.487641
U2AF1L5	0.593757	0.0311929	0.99975				Untreated	0.99975		RTN3	-0.762956	0.0393709	0.999923				Untreated	0.999923		PSMG3				0.714152	0.0492822	0.491818	Foralumab	0.491818
UBE2Z	-0.629786	0.0368809	0.99975				Untreated	0.99975		SC5D	0.742735	0.0436784	0.999923				Untreated	0.999923		REEP5				-0.519316	0.0493141	0.491818	Foralumab	0.491818
USP8	0.515939	0.0420921	0.99975				Untreated	0.99975		SERGEF	-0.764893	0.0429752	0.999923				Untreated	0.999923		SIRT7				-0.740553	0.0490856	0.491818	Foralumab	0.491818
VAT1	-0.630268	0.0412552	0.99975				Untreated	0.99975		SETDB1	0.71226	0.0394543	0.999923				Untreated	0.999923		TXNRD1				0.773868	0.0491393	0.491818	Foralumab	0.491818
VPS51	-0.623199	0.0398315	0.99975				Untreated	0.99975		SF1	0.568439	0.0492896	0.999923				Untreated	0.999923		EPC1				0.708726	0.0495461	0.492423	Foralumab	0.492423
WDR77	-0.614846	0.0442959	0.99975				Untreated	0.99975		SHFL	-0.69388	0.0461843	0.999923				Untreated	0.999923		MAML3				0.661156	0.0496218	0.492505	Foralumab	0.492505
WWP1	0.684553	0.0231376	0.99975				Untreated	0.99975		SLC2A5	0.710211	0.036483	0.999923				Untreated	0.999923		PRKAG2				0.768604	0.0499653	0.494774	Foralumab	0.494774
XPO5	0.630641	0.0240024	0.99975				Untreated	0.99975		SLC66A3	-0.801808	0.0339201	0.999923				Untreated	0.999923		PHLDB1	2.87683	2.80094e-12	2.29245e-09				Untreated	2.29245e-09
XPO6	-0.60758	0.0335545	0.99975				Untreated	0.99975		SMAD4	0.732938	0.0354764	0.999923				Untreated	0.999923		EIF2AK2	-1.53717	3.86065e-09	2.04455e-06				Untreated	2.04455e-06
ZC3H7A	0.470285	0.0469632	0.99975				Untreated	0.99975		SOCS7	-0.776836	0.0427634	0.999923				Untreated	0.999923		DGKH	1.95489	4.97442e-08	2.1326e-05				Untreated	2.1326e-05
ZMYM4	-0.672272	0.0248255	0.99975				Untreated	0.99975		STARD9	0.782201	0.0360324	0.999923				Untreated	0.999923		TPT1	1.16439	7.87197e-07	0.000208445				Untreated	0.000208445
ZNF250	0.608024	0.037768	0.99975				Untreated	0.99975		STYXL1	-0.744495	0.0418925	0.999923				Untreated	0.999923		HDAC4	-1.77879	1.66325e-06	0.000383955				Untreated	0.000383955
ZNF500	-0.686708	0.0222927	0.99975				Untreated	0.99975		TRIM38	-0.48105	0.0474353	0.999923				Untreated	0.999923		ACAP2	-1.42234	4.69668e-06	0.000898346				Untreated	0.000898346
ZNF506	-0.584224	0.0295404	0.99975				Untreated	0.99975		TSHR	0.739166	0.0360184	0.999923				Untreated	0.999923		ZFYVE16	1.55762	1.16929e-05	0.00202444				Untreated	0.00202444
ZNF585B	0.658205	0.0226207	0.99975				Untreated	0.99975		UBR4	0.529282	0.0463021	0.999923				Untreated	0.999923		STAT4	1.91216	1.2233e-05	0.002078				Untreated	0.002078
ZNF616	0.665273	0.0300177	0.99975				Untreated	0.99975		USE1	0.64699	0.0369258	0.999923				Untreated	0.999923		PRKCE	-1.76941	1.58652e-05	0.00250587				Untreated	0.00250587
ZRSR2	-0.623833	0.042075	0.99975				Untreated	0.99975		YTHDC1	0.643085	0.0405091	0.999923				Untreated	0.999923		SGTA	1.15141	2.04637e-05	0.00302024				Untreated	0.00302024
										ZC3H13	0.649439	0.0347277	0.999923				Untreated	0.999923		SDC2	1.77786	2.08287e-05	0.00302453				Untreated	0.00302453
										ZDHHC18	0.761586	0.0426783	0.999923				Untreated	0.999923		ZMIZ1	1.08121	2.19689e-05	0.00313946				Untreated	0.00313946
										ZNF317	-0.661848	0.0420103	0.999923				Untreated	0.999923		SERPINB2	1.73606	2.53217e-05	0.00340256				Untreated	0.00340256
										ZNF407	-0.786913	0.0379765	0.999923				Untreated	0.999923		TBCK	-1.75215	2.82696e-05	0.00363587				Untreated	0.00363587
										ZNF543	0.705636	0.0404281	0.999923				Untreated	0.999923		NEDD9	1.16673	2.90009e-05	0.00367739				Untreated	0.00367739
										ZNF678	0.794071	0.0351423	0.999923				Untreated	0.999923		EIF4B	1.22568	4.55774e-05	0.00532901				Untreated	0.00532901
										ZWILCH	0.740796	0.0420407	0.999923				Untreated	0.999923		RUBCNL	1.63782	4.84081e-05	0.00556723				Untreated	0.00556723
																				OASL	-1.09343	4.88516e-05	0.00556723				Untreated	0.00556723
																				TRAF3	1.28952	5.05777e-05	0.00569188				Untreated	0.00569188
																				RCOR1	1.41769	5.29967e-05	0.00581865				Untreated	0.00581865
																				TMCC3	1.49626	6.69517e-05	0.0066974				Untreated	0.0066974
																				DIAPH2	-1.33385	7.33701e-05	0.00725881				Untreated	0.00725881
																				TGM2	1.49831	0.000105884	0.00969786				Untreated	0.00969786
																				PTGR1	-1.74055	0.000115154	0.010164				Untreated	0.010164
																				FCF1	-1.07964	0.000134211	0.0115076				Untreated	0.0115076
																				GMPR	-1.91732	0.000139348	0.0118354				Untreated	0.0118354
																				H2BC21	-1.30619	0.000184602	0.0149727				Untreated	0.0149727
																				ACSF3	-1.36185	0.000187725	0.0150574				Untreated	0.0150574
																				MTMR1	-1.64134	0.000188991	0.0150574				Untreated	0.0150574
																				PITPNA	1.40202	0.000192358	0.0151912				Untreated	0.0151912
																				GK	1.26623	0.000202846	0.0154368				Untreated	0.0154368
																				TMA7	0.815299	0.000209163	0.0156925				Untreated	0.0156925
																				SAMD9	-1.30092	0.000211504	0.0157369				Untreated	0.0157369
																				CXCL1	1.6017	0.000214864	0.0158559				Untreated	0.0158559
																				CD9	1.36695	0.000244431	0.0174652				Untreated	0.0174652
																				SKIL	1.19321	0.000247316	0.0175322				Untreated	0.0175322
																				DDX60	-1.48296	0.000250739	0.0176359				Untreated	0.0176359
																				PLD2	1.14802	0.000260955	0.0180721				Untreated	0.0180721
																				FAM107B	1.16836	0.000270469	0.0183085				Untreated	0.0183085
																				MTFP1	1.43108	0.000281975	0.0188046				Untreated	0.0188046
																				SUPT6H	0.960455	0.000314009	0.0203383				Untreated	0.0203383
																				TSC22D2	1.09922	0.000329726	0.0210696				Untreated	0.0210696
																				DHRSX	-1.33468	0.00032998	0.0210696				Untreated	0.0210696
																				SMAD2	-0.881781	0.000340578	0.0214421				Untreated	0.0214421
																				GIMAP7	-1.73814	0.000360299	0.0222912				Untreated	0.0222912
																				MARK3	0.872038	0.000388377	0.0234669				Untreated	0.0234669
																				FHL2	-1.32685	0.000397429	0.0235398				Untreated	0.0235398
																				HLA-DOA	1.21571	0.000420209	0.0244728				Untreated	0.0244728
																				IGF2R	-1.15834	0.000420555	0.0244728				Untreated	0.0244728
																				CXCR2	-1.55225	0.000421335	0.0244728				Untreated	0.0244728
																				DEF8	0.903121	0.000468065	0.0262327				Untreated	0.0262327
																				B4GALT1	0.739132	0.000525019	0.0289701				Untreated	0.0289701
																				IDH1	-1.38862	0.000527723	0.0289701				Untreated	0.0289701
																				ZMYM2	0.901423	0.000573565	0.0311073				Untreated	0.0311073
																				SPSB1	1.5234	0.000585161	0.0314589				Untreated	0.0314589
																				ITGAL	-0.853739	0.000600862	0.031821				Untreated	0.031821
																				SRA1	0.648932	0.000608193	0.0320208				Untreated	0.0320208
																				AP3D1	-0.808021	0.00063993	0.0328696				Untreated	0.0328696
																				STIM1	-1.30359	0.000640767	0.0328696				Untreated	0.0328696
																				CD226	1.44347	0.000645054	0.0328696				Untreated	0.0328696
																				SLC7A11	1.29228	0.000668632	0.0328696				Untreated	0.0328696
																				CD300LB	1.06484	0.000677922	0.0328696				Untreated	0.0328696
																				FBXW11	1.19749	0.000678753	0.0328696				Untreated	0.0328696
																				RABGAP1L	-0.903211	0.000679078	0.0328696				Untreated	0.0328696
																				ANKS3	-1.3264	0.000737933	0.0351514				Untreated	0.0351514
																				HMGB2	-1.37352	0.000755695	0.0354922				Untreated	0.0354922
																				RIPOR2	-1.29053	0.000797025	0.0366103				Untreated	0.0366103
																				DIP2B	-0.984954	0.000801259	0.036618				Untreated	0.036618
																				LRRK2	-1.18923	0.000829298	0.0375184				Untreated	0.0375184
																				MDH1	-0.849884	0.000858363	0.0386211				Untreated	0.0386211
																				KDM1B	-1.03762	0.000895049	0.0396952				Untreated	0.0396952
																				MPP1	1.00774	0.000922655	0.0406295				Untreated	0.0406295
																				P2RY13	-1.36828	0.000925141	0.0406295				Untreated	0.0406295
																				OSBPL5	-1.22687	0.000944453	0.0411507				Untreated	0.0411507
																				PID1	1.0973	0.000969911	0.0417804				Untreated	0.0417804
																				TRIT1	-1.40172	0.000985489	0.0422493				Untreated	0.0422493
																				METTL1	1.29475	0.000991476	0.0423045				Untreated	0.0423045
																				KCTD20	0.920988	0.00100476	0.0426689				Untreated	0.0426689
																				BCAR3	1.45355	0.00107088	0.0446349				Untreated	0.0446349
																				FAM117B	-1.16199	0.00112256	0.0458036				Untreated	0.0458036
																				MTHFD1L	1.4234	0.00112436	0.0458036				Untreated	0.0458036
																				RETREG2	-0.949804	0.00114545	0.0463259				Untreated	0.0463259
																				CPEB4	1.23328	0.0011564	0.0463259				Untreated	0.0463259
																				CD86	0.885408	0.0013256	0.0516641				Untreated	0.0516641
																				FLT3	-1.39465	0.00136297	0.0524089				Untreated	0.0524089
																				USP30	-1.17704	0.00136337	0.0524089				Untreated	0.0524089
																				SORL1	0.797521	0.00137513	0.0524089				Untreated	0.0524089
																				DAGLA	1.43042	0.00138203	0.0524089				Untreated	0.0524089
																				KYNU	0.734294	0.00138421	0.0524089				Untreated	0.0524089
																				NCOA2	-0.851927	0.00138546	0.0524089				Untreated	0.0524089
																				PCYT1A	0.949582	0.00145092	0.0537068				Untreated	0.0537068
																				OPTN	-1.24398	0.00145279	0.0537068				Untreated	0.0537068
																				CHST15	0.952731	0.00146816	0.0537311				Untreated	0.0537311
																				RRAS	-1.32766	0.00148342	0.0540699				Untreated	0.0540699
																				DOCK10	1.09764	0.00150373	0.054589				Untreated	0.054589
																				ZNF700	-1.1189	0.0015432	0.0551258				Untreated	0.0551258
																				STX4	0.962174	0.0015459	0.0551258				Untreated	0.0551258
																				ATG2B	-1.16106	0.00154649	0.0551258				Untreated	0.0551258
																				ANKHD1-EIF4EBP3	-0.71245	0.00166056	0.0581334				Untreated	0.0581334
																				MIOS	1.1552	0.00167239	0.0581334				Untreated	0.0581334
																				SIRT5	-1.26304	0.00171125	0.0590283				Untreated	0.0590283
																				ZFC3H1	0.683197	0.0017379	0.0597189				Untreated	0.0597189
																				MTARC1	-1.17114	0.00186801	0.0635023				Untreated	0.0635023
																				RAB3GAP2	-1.14318	0.00186917	0.0635023				Untreated	0.0635023
																				SLC1A5	-1.25652	0.00189305	0.0640719				Untreated	0.0640719
																				DNMBP	1.18178	0.00192644	0.0649578				Untreated	0.0649578
																				ZBTB49	-1.38296	0.00195466	0.0655779				Untreated	0.0655779
																				FKBP3	-1.07895	0.0019594	0.0655779				Untreated	0.0655779
																				TNFRSF1B	0.563246	0.00204417	0.0673149				Untreated	0.0673149
																				IL1RL2	1.33344	0.00205123	0.0673149				Untreated	0.0673149
																				GIMAP2	-1.15486	0.00206098	0.0673149				Untreated	0.0673149
																				NFKBID	0.811939	0.00206364	0.0673149				Untreated	0.0673149
																				HERC5	-1.36273	0.00209658	0.0680016				Untreated	0.0680016
																				CCRL2	1.14676	0.0020998	0.0680016				Untreated	0.0680016
																				CLDND1	0.926952	0.00217329	0.0701296				Untreated	0.0701296
																				AGO4	-0.8016	0.00222908	0.0711645				Untreated	0.0711645
																				MEF2C	0.895152	0.00223825	0.0712047				Untreated	0.0712047
																				NUP98	0.69478	0.00227442	0.0721007				Untreated	0.0721007
																				TMEM68	-1.26979	0.00230226	0.0724729				Untreated	0.0724729
																				SLC25A19	1.10968	0.00239519	0.0748746				Untreated	0.0748746
																				LBR	0.915108	0.0024134	0.0751829				Untreated	0.0751829
																				SLC16A7	-1.11893	0.00243557	0.0752015				Untreated	0.0752015
																				BRWD1	1.04965	0.00243906	0.0752015				Untreated	0.0752015
																				KIAA0319L	-0.826757	0.00245002	0.0752818				Untreated	0.0752818
																				KLF7	-0.993081	0.0024903	0.07608				Untreated	0.07608
																				MICB	-1.21244	0.00250215	0.0761043				Untreated	0.0761043
																				MYCBP	-1.247	0.00251122	0.0761229				Untreated	0.0761229
																				HLA-DMA	0.653353	0.00256955	0.0773018				Untreated	0.0773018
																				ZNF800	1.17714	0.00257587	0.0773018				Untreated	0.0773018
																				TNFAIP8L2	-1.20578	0.00261171	0.0781171				Untreated	0.0781171
																				FNDC3A	0.990253	0.00262088	0.0781318				Untreated	0.0781318
																				CD300E	0.830211	0.0026647	0.0787776				Untreated	0.0787776
																				SMC1A	-0.864663	0.00268515	0.0787776				Untreated	0.0787776
																				LSM2	-1.24285	0.00268588	0.0787776				Untreated	0.0787776
																				FLNB	1.31342	0.0026863	0.0787776				Untreated	0.0787776
																				CYSLTR1	-1.14286	0.00272707	0.0797137				Untreated	0.0797137
																				FMC1	-1.25897	0.0027844	0.0808517				Untreated	0.0808517
																				CARS1	-0.959423	0.00280316	0.0808517				Untreated	0.0808517
																				GNA13	0.717327	0.00281091	0.0808517				Untreated	0.0808517
																				C11orf98	-1.31919	0.00290371	0.0827618				Untreated	0.0827618
																				ABCC1	0.964145	0.00290575	0.0827618				Untreated	0.0827618
																				SIRT3	-1.19603	0.00291408	0.0827618				Untreated	0.0827618
																				CMTR1	-1.1071	0.00294691	0.083431				Untreated	0.083431
																				SORT1	-0.925583	0.00297902	0.0838129				Untreated	0.0838129
																				CNP	-0.975504	0.00301331	0.0845134				Untreated	0.0845134
																				C1GALT1	-1.07716	0.00303163	0.0847633				Untreated	0.0847633
																				KIAA1958	-0.937758	0.00309385	0.08613				Untreated	0.08613
																				GNA15	0.879541	0.0031252	0.0863072				Untreated	0.0863072
																				IPO7	-1.23336	0.00317099	0.0870378				Untreated	0.0870378
																				BID	0.996987	0.00322249	0.0879155				Untreated	0.0879155
																				SMAP2	-1.03811	0.00337953	0.0908349				Untreated	0.0908349
																				RNF145	1.02737	0.00337995	0.0908349				Untreated	0.0908349
																				GLMP	-0.879917	0.00348401	0.0933528				Untreated	0.0933528
																				MARCHF6	0.670896	0.00352929	0.0942853				Untreated	0.0942853
																				KCNJ15	1.16974	0.00356496	0.0948192				Untreated	0.0948192
																				RMDN1	-0.958141	0.00357372	0.0948192				Untreated	0.0948192
																				ORC2	-1.24487	0.00360702	0.0948192				Untreated	0.0948192
																				TMEM70	1.02707	0.00361029	0.0948192				Untreated	0.0948192
																				NUB1	-0.968956	0.00368406	0.096138				Untreated	0.096138
																				ATP1B3	0.803505	0.0037378	0.0964225				Untreated	0.0964225
																				ETV6	0.82791	0.00382343	0.0983496				Untreated	0.0983496
																				SPECC1	-0.759239	0.00384774	0.0986928				Untreated	0.0986928
																				SMPDL3A	0.906429	0.00395687	0.100402				Untreated	0.100402
																				CRTC3	-1.05854	0.00415797	0.104858				Untreated	0.104858
																				FAM13A	-1.02395	0.00417744	0.105054				Untreated	0.105054
																				ACACB	1.2106	0.00419648	0.105239				Untreated	0.105239
																				CAMKK1	1.05261	0.0042259	0.10539				Untreated	0.10539
																				DUSP7	-0.980191	0.00433524	0.107226				Untreated	0.107226
																				BTRC	-1.24327	0.00434991	0.107294				Untreated	0.107294
																				DYNC1LI2	0.981046	0.00437656	0.107656				Untreated	0.107656
																				PDPK1	-0.858993	0.00442314	0.108505				Untreated	0.108505
																				AKT2	0.945952	0.00449913	0.109771				Untreated	0.109771
																				BIRC2	0.8765	0.00454346	0.110553				Untreated	0.110553
																				PLPP3	1.27001	0.004609	0.111545				Untreated	0.111545
																				MYO9A	-1.17124	0.00465726	0.111827				Untreated	0.111827
																				LRPPRC	0.91662	0.00465791	0.111827				Untreated	0.111827
																				SIPA1L1	0.881743	0.00469929	0.112399				Untreated	0.112399
																				RYBP	0.810093	0.00471687	0.112399				Untreated	0.112399
																				ALCAM	1.03455	0.00478712	0.113417				Untreated	0.113417
																				AQP9	0.943971	0.00483112	0.114159				Untreated	0.114159
																				DSE	0.949343	0.00501501	0.117885				Untreated	0.117885
																				HRH2	-1.05371	0.00510732	0.118729				Untreated	0.118729
																				FAM168B	0.727997	0.00511209	0.118729				Untreated	0.118729
																				LLGL1	-1.15482	0.00511684	0.118729				Untreated	0.118729
																				TSHZ3	-1.21627	0.00516669	0.119271				Untreated	0.119271
																				RAP1GAP2	-0.913308	0.00519535	0.119626				Untreated	0.119626
																				STING1	-0.912855	0.00527729	0.121188				Untreated	0.121188
																				UCHL3	-1.00608	0.00529012	0.121188				Untreated	0.121188
																				RPL24	0.632913	0.00534733	0.122188				Untreated	0.122188
																				CHD7	1.10909	0.0055262	0.124926				Untreated	0.124926
																				SNAPC3	-0.992125	0.00553655	0.124926				Untreated	0.124926
																				NFIA	-1.21087	0.00556814	0.125325				Untreated	0.125325
																				POU5F1	-1.03005	0.00559265	0.125563				Untreated	0.125563
																				RPS14	0.665815	0.00566019	0.126453				Untreated	0.126453
																				DAG1	-1.15417	0.0056604	0.126453				Untreated	0.126453
																				TMEM131L	-1.07955	0.00569346	0.12674				Untreated	0.12674
																				ARHGAP18	1.0622	0.0057014	0.12674				Untreated	0.12674
																				HSPA13	1.04803	0.00572046	0.12685				Untreated	0.12685
																				FBP1	0.929635	0.00577105	0.127345				Untreated	0.127345
																				STK38L	1.00806	0.00587412	0.128987				Untreated	0.128987
																				MXD4	-1.10282	0.00603576	0.131893				Untreated	0.131893
																				EAF2	-1.17923	0.00609662	0.1329				Untreated	0.1329
																				GMFB	0.938947	0.00613064	0.133319				Untreated	0.133319
																				ZSWIM6	0.881849	0.00620144	0.134534				Untreated	0.134534
																				TMEM123	-0.832764	0.00629572	0.135747				Untreated	0.135747
																				PHF11	-0.921917	0.00630629	0.135747				Untreated	0.135747
																				MYO18A	-1.00147	0.00631766	0.135747				Untreated	0.135747
																				BCL11A	-0.94154	0.00652094	0.13942				Untreated	0.13942
																				CXCL10	-0.520066	0.00657126	0.13942				Untreated	0.13942
																				INTS10	-0.947332	0.00661071	0.13942				Untreated	0.13942
																				ZNF514	-1.13208	0.00661251	0.13942				Untreated	0.13942
																				MYCBP2	-1.00553	0.00665053	0.139894				Untreated	0.139894
																				TFAM	-1.13161	0.00667961	0.140178				Untreated	0.140178
																				ZFYVE27	0.773144	0.00672905	0.140769				Untreated	0.140769
																				AKAP12	1.16166	0.00673903	0.140769				Untreated	0.140769
																				GIMAP6	-1.19679	0.00675503	0.140777				Untreated	0.140777
																				GTF3C3	-1.11723	0.00679274	0.141236				Untreated	0.141236
																				ARHGAP1	-0.606023	0.006861	0.141999				Untreated	0.141999
																				WAS	-0.935923	0.00690977	0.142354				Untreated	0.142354
																				MYO1C	0.988327	0.00698647	0.142998				Untreated	0.142998
																				TPR	0.934254	0.0070097	0.143103				Untreated	0.143103
																				ADCY7	-0.807737	0.00710317	0.144683				Untreated	0.144683
																				SLC38A6	-1.06865	0.00723586	0.146392				Untreated	0.146392
																				ACAD10	1.11239	0.00739717	0.14932				Untreated	0.14932
																				ABHD6	1.13733	0.00754797	0.152023				Untreated	0.152023
																				NUP188	0.836742	0.00766681	0.154072				Untreated	0.154072
																				SEC62	0.742454	0.00774258	0.155019				Untreated	0.155019
																				JAK3	-0.814628	0.00774835	0.155019				Untreated	0.155019
																				ST3GAL1	0.69473	0.00777935	0.155294				Untreated	0.155294
																				TNFRSF10D	1.03162	0.00788736	0.156444				Untreated	0.156444
																				RPLP2	0.567944	0.00792505	0.15678				Untreated	0.15678
																				RPL36A	0.585338	0.00794085	0.15678				Untreated	0.15678
																				SPTAN1	-1.06409	0.00816643	0.160179				Untreated	0.160179
																				LIMS1	0.857513	0.00842435	0.163643				Untreated	0.163643
																				CLN8	0.787434	0.00843245	0.163643				Untreated	0.163643
																				ASH2L	-1.06091	0.00845	0.163643				Untreated	0.163643
																				DAXX	-0.999336	0.00846897	0.163643				Untreated	0.163643
																				NLRC5	-1.1122	0.00847827	0.163643				Untreated	0.163643
																				ACBD3	0.880249	0.00847981	0.163643				Untreated	0.163643
																				MORC2	-0.987083	0.00850928	0.163643				Untreated	0.163643
																				CWC27	-1.09569	0.00852478	0.163643				Untreated	0.163643
																				EDC4	0.879682	0.00862586	0.165231				Untreated	0.165231
																				SSB	-0.816922	0.00868233	0.16596				Untreated	0.16596
																				LAMB3	0.836121	0.00893642	0.170125				Untreated	0.170125
																				PCM1	-1.00986	0.00903156	0.171181				Untreated	0.171181
																				LGALS9	-0.709223	0.00908823	0.171893				Untreated	0.171893
																				RPS2	0.578005	0.00913029	0.172327				Untreated	0.172327
																				LPCAT1	0.698706	0.00916339	0.17259				Untreated	0.17259
																				DOCK8	-0.708892	0.00928873	0.174585				Untreated	0.174585
																				UAP1L1	-0.893696	0.0093239	0.174881				Untreated	0.174881
																				MTDH	-0.669331	0.00936343	0.175258				Untreated	0.175258
																				TLR5	-1.03938	0.00938533	0.175303				Untreated	0.175303
																				PTCH1	1.10078	0.00941186	0.175435				Untreated	0.175435
																				UBL4A	0.917731	0.00959556	0.178121				Untreated	0.178121
																				ARHGAP10	1.04321	0.00964907	0.178746				Untreated	0.178746
																				NLRC4	-1.0787	0.00974047	0.1797				Untreated	0.1797
																				SUN1	-0.870894	0.0100053	0.183085				Untreated	0.183085
																				ABL2	0.865798	0.0100641	0.183762				Untreated	0.183762
																				MAP3K3	-0.844465	0.0100831	0.183762				Untreated	0.183762
																				PCNX1	0.677309	0.0101622	0.184829				Untreated	0.184829
																				AGO3	0.626963	0.0102215	0.185261				Untreated	0.185261
																				GUK1	0.564506	0.0102271	0.185261				Untreated	0.185261
																				SIDT2	-0.869588	0.0102784	0.185792				Untreated	0.185792
																				RNF138	-0.799922	0.0103077	0.185792				Untreated	0.185792
																				C1orf52	0.912924	0.0103184	0.185792				Untreated	0.185792
																				CREB5	-0.962982	0.0104087	0.186673				Untreated	0.186673
																				PPP2R2D	0.822849	0.010468	0.187207				Untreated	0.187207
																				FAF2	0.765078	0.0104983	0.187207				Untreated	0.187207
																				TGIF1	0.783853	0.0105298	0.187207				Untreated	0.187207
																				EPHB2	-0.956427	0.0105425	0.187207				Untreated	0.187207
																				HOMER2	1.10161	0.0105737	0.187257				Untreated	0.187257
																				SLC1A3	-1.07898	0.0105945	0.187257				Untreated	0.187257
																				DNTTIP1	-0.990977	0.0106265	0.187257				Untreated	0.187257
																				SKIV2L	-0.842317	0.0106285	0.187257				Untreated	0.187257
																				USP3	-0.557577	0.0106948	0.18776				Untreated	0.18776
																				PPP2R5A	-0.904348	0.0107151	0.18776				Untreated	0.18776
																				GPS2	-0.661949	0.010774	0.188346				Untreated	0.188346
																				HSPA1A	0.188684	0.0108414	0.188538				Untreated	0.188538
																				EIF3E	0.506183	0.0108508	0.188538				Untreated	0.188538
																				CHRNB1	-1.0968	0.0108563	0.188538				Untreated	0.188538
																				ALG9	-0.889198	0.0108687	0.188538				Untreated	0.188538
																				BLMH	0.94638	0.0110049	0.19026				Untreated	0.19026
																				TSC2	-0.675249	0.0110925	0.19026				Untreated	0.19026
																				CHP1	0.557814	0.0111084	0.19026				Untreated	0.19026
																				IGF2BP2	1.00161	0.0111144	0.19026				Untreated	0.19026
																				NUP62	0.671668	0.0111152	0.19026				Untreated	0.19026
																				SOCS6	0.996889	0.0111189	0.19026				Untreated	0.19026
																				SLC35A1	-1.09894	0.0111707	0.19026				Untreated	0.19026
																				NDFIP1	-0.730759	0.0111793	0.19026				Untreated	0.19026
																				LEPROTL1	-0.784499	0.0112787	0.190466				Untreated	0.190466
																				DHRS9	1.065	0.0113184	0.190466				Untreated	0.190466
																				SGPL1	0.668252	0.011495	0.192359				Untreated	0.192359
																				PUM2	-1.09711	0.0116813	0.194753				Untreated	0.194753
																				TENT5A	-0.893183	0.0117069	0.194819				Untreated	0.194819
																				HDAC5	-1.03537	0.0117998	0.195547				Untreated	0.195547
																				TSG101	0.724093	0.0118158	0.195547				Untreated	0.195547
																				NAPRT	-0.686335	0.0118889	0.196396				Untreated	0.196396
																				STAMBPL1	-1.06823	0.0119781	0.197008				Untreated	0.197008
																				HADHA	0.765776	0.0121088	0.19813				Untreated	0.19813
																				PRKCSH	0.624922	0.0121339	0.19813				Untreated	0.19813
																				PLXND1	-0.915974	0.0121822	0.19813				Untreated	0.19813
																				WDR81	-0.929464	0.0121919	0.19813				Untreated	0.19813
																				FN1	1.08693	0.0122789	0.198993				Untreated	0.198993
																				TMEM50B	-0.694975	0.0123217	0.199159				Untreated	0.199159
																				AAMDC	-0.791753	0.0124036	0.199328				Untreated	0.199328
																				NR4A2	0.678851	0.0124119	0.199328				Untreated	0.199328
																				GAPT	-1.01995	0.0124206	0.199328				Untreated	0.199328
																				KLHL8	-0.939642	0.0125377	0.200492				Untreated	0.200492
																				VRK3	-0.850332	0.01264	0.20177				Untreated	0.20177
																				NDUFC1	-0.784615	0.0127223	0.202724				Untreated	0.202724
																				GNPDA1	-0.941435	0.012816	0.203693				Untreated	0.203693
																				ZEB2	0.703735	0.0130154	0.206298				Untreated	0.206298
																				PRR14	-1.0646	0.0130489	0.206466				Untreated	0.206466
																				RCE1	0.921796	0.0130763	0.206537				Untreated	0.206537
																				ARID5A	0.695002	0.0131388	0.207161				Untreated	0.207161
																				ITGB8	1.08377	0.0131699	0.207287				Untreated	0.207287
																				CD163	-0.994715	0.0132419	0.208057				Untreated	0.208057
																				KATNB1	-0.866127	0.0132914	0.208472				Untreated	0.208472
																				LMO2	-0.993668	0.0133333	0.208496				Untreated	0.208496
																				UTP11	0.657288	0.0133452	0.208496				Untreated	0.208496
																				ZNF207	0.547395	0.0133856	0.208496				Untreated	0.208496
																				TOMM7	0.567001	0.0135027	0.20982				Untreated	0.20982
																				PDP1	-1.01485	0.0135173	0.20982				Untreated	0.20982
																				ACTG1	0.764317	0.0135991	0.210004				Untreated	0.210004
																				ADAT1	-0.914514	0.0136399	0.210274				Untreated	0.210274
																				BRPF3	0.786284	0.0136689	0.210361				Untreated	0.210361
																				GSDMA	-0.904427	0.0137078	0.2106				Untreated	0.2106
																				HMGXB3	0.756272	0.0137368	0.210685				Untreated	0.210685
																				RPS17	0.5947	0.0138677	0.211762				Untreated	0.211762
																				LRRC8C	0.923067	0.0138745	0.211762				Untreated	0.211762
																				DDX3X	0.526437	0.0138914	0.211762				Untreated	0.211762
																				NDUFA12	-0.699201	0.0139043	0.211762				Untreated	0.211762
																				SNAI3	0.969067	0.0139246	0.211762				Untreated	0.211762
																				ARID1B	-0.939503	0.0141954	0.214432				Untreated	0.214432
																				GPR132	0.621842	0.0143443	0.215956				Untreated	0.215956
																				RBX1	-0.56734	0.0143718	0.216008				Untreated	0.216008
																				POP5	-0.909247	0.014468	0.217092				Untreated	0.217092
																				RASGRP4	-0.670472	0.0145521	0.217991				Untreated	0.217991
																				CMBL	0.826776	0.0145767	0.217997				Untreated	0.217997
																				SAR1A	0.51113	0.0146635	0.218569				Untreated	0.218569
																				PIEZO1	-0.783446	0.0147101	0.218901				Untreated	0.218901
																				LONRF1	-0.949577	0.0147893	0.219717				Untreated	0.219717
																				NSMAF	0.61886	0.0148859	0.220786				Untreated	0.220786
																				RFX7	1.02106	0.014921	0.220944				Untreated	0.220944
																				RRBP1	-0.822915	0.0150762	0.221934				Untreated	0.221934
																				CRIP1	0.646576	0.015087	0.221934				Untreated	0.221934
																				EIF3F	0.726589	0.0151062	0.221934				Untreated	0.221934
																				CSNK1A1	0.458196	0.0151111	0.221934				Untreated	0.221934
																				MRPS34	-0.85393	0.0151536	0.2221				Untreated	0.2221
																				TLCD5	-0.962348	0.0151718	0.2221				Untreated	0.2221
																				GTF2H2C	-0.856112	0.0152695	0.222732				Untreated	0.222732
																				IER3IP1	-0.973202	0.0152889	0.222732				Untreated	0.222732
																				NFS1	-0.946441	0.0152891	0.222732				Untreated	0.222732
																				LONRF3	0.795229	0.0153474	0.223219				Untreated	0.223219
																				TNS3	-0.772746	0.0153774	0.223295				Untreated	0.223295
																				ZCCHC24	0.959111	0.0155423	0.225326				Untreated	0.225326
																				F11R	-0.671088	0.015666	0.226754				Untreated	0.226754
																				NIBAN2	0.799629	0.0158027	0.228365				Untreated	0.228365
																				HSDL2	-0.920317	0.0159266	0.229116				Untreated	0.229116
																				CCDC86	-0.989087	0.0159324	0.229116				Untreated	0.229116
																				VEZT	-0.974017	0.0159608	0.229116				Untreated	0.229116
																				CD300A	-0.688731	0.0160389	0.229116				Untreated	0.229116
																				PTPN7	0.881294	0.0160687	0.229116				Untreated	0.229116
																				AGO2	0.770704	0.0160812	0.229116				Untreated	0.229116
																				RACK1	0.648703	0.0160944	0.229116				Untreated	0.229116
																				LDLR	-0.720788	0.0161019	0.229116				Untreated	0.229116
																				APTX	-0.878322	0.016112	0.229116				Untreated	0.229116
																				CCL20	1.06329	0.0161417	0.229116				Untreated	0.229116
																				TRIM22	-0.628784	0.0162499	0.230028				Untreated	0.230028
																				TECPR1	-0.721281	0.0164343	0.231185				Untreated	0.231185
																				MOB3B	0.956541	0.0164683	0.231302				Untreated	0.231302
																				RPL27	0.606589	0.0165314	0.231826				Untreated	0.231826
																				HAVCR2	0.830202	0.0165585	0.231844				Untreated	0.231844
																				RNASEL	-0.950044	0.0166303	0.232218				Untreated	0.232218
																				CSK	-0.736238	0.0166367	0.232218				Untreated	0.232218
																				KCMF1	0.796859	0.0167343	0.23301				Untreated	0.23301
																				IK	-0.604783	0.0167453	0.23301				Untreated	0.23301
																				ZBTB7B	-0.974448	0.0168263	0.233413				Untreated	0.233413
																				AKAP13	0.703769	0.0168343	0.233413				Untreated	0.233413
																				NPM1	0.598981	0.0168751	0.233413				Untreated	0.233413
																				AVPI1	0.823891	0.0169005	0.233413				Untreated	0.233413
																				EXT1	-0.949529	0.0169777	0.234074				Untreated	0.234074
																				RPL15	0.696718	0.0171308	0.235824				Untreated	0.235824
																				HLA-DQB1	0.825092	0.0172011	0.236429				Untreated	0.236429
																				SLC27A3	-0.940638	0.0173661	0.238273				Untreated	0.238273
																				HLA-DQB2	0.929319	0.0173918	0.238273				Untreated	0.238273
																				NMRAL1	-0.83846	0.0174356	0.238273				Untreated	0.238273
																				PNRC2	0.627941	0.0174411	0.238273				Untreated	0.238273
																				ENC1	0.962541	0.0176564	0.240485				Untreated	0.240485
																				CA5B	-0.734202	0.0176995	0.240708				Untreated	0.240708
																				ERVK3-1	0.680113	0.0178702	0.242663				Untreated	0.242663
																				XPNPEP3	0.825433	0.0179008	0.242713				Untreated	0.242713
																				ENOX2	-1.01074	0.0179905	0.243197				Untreated	0.243197
																				KIF13B	-0.845357	0.0181698	0.244884				Untreated	0.244884
																				PRKCB	-0.643169	0.0182257	0.245169				Untreated	0.245169
																				ADAMTSL4	-0.639273	0.0184185	0.246178				Untreated	0.246178
																				SPIRE1	1.00782	0.0184298	0.246178				Untreated	0.246178
																				AKAP8L	0.940229	0.0184434	0.246178				Untreated	0.246178
																				TPPP3	0.873985	0.0184572	0.246178				Untreated	0.246178
																				ZNF721	0.832276	0.0185185	0.24663				Untreated	0.24663
																				TRAF5	0.983426	0.0187468	0.248858				Untreated	0.248858
																				RABGGTB	0.76305	0.0188117	0.248858				Untreated	0.248858
																				VSIR	-0.786758	0.0188188	0.248858				Untreated	0.248858
																				NCR3LG1	0.913585	0.0188642	0.248858				Untreated	0.248858
																				PLPBP	-0.835363	0.0188793	0.248858				Untreated	0.248858
																				TTC4	0.94637	0.0191105	0.250994				Untreated	0.250994
																				CASP10	-0.749605	0.0191529	0.250994				Untreated	0.250994
																				POLG	-0.970129	0.0192697	0.252158				Untreated	0.252158
																				PUF60	0.638025	0.019408	0.25315				Untreated	0.25315
																				RBM8A	0.583666	0.0194207	0.25315				Untreated	0.25315
																				SLC25A3	0.520733	0.0194298	0.25315				Untreated	0.25315
																				NIPAL1	-0.93295	0.0194913	0.253219				Untreated	0.253219
																				CPT1B	-1.01012	0.0195381	0.253461				Untreated	0.253461
																				SNAPIN	-0.837019	0.0197363	0.255295				Untreated	0.255295
																				HCAR3	0.866288	0.0198213	0.255823				Untreated	0.255823
																				KLHL28	0.851787	0.0198339	0.255823				Untreated	0.255823
																				NCBP2	0.727925	0.0200392	0.257542				Untreated	0.257542
																				RPAIN	-0.637356	0.0201169	0.257542				Untreated	0.257542
																				KDM4A	-0.978838	0.0201292	0.257542				Untreated	0.257542
																				KIFBP	-0.950013	0.0201373	0.257542				Untreated	0.257542
																				CNTRL	-0.970855	0.0201388	0.257542				Untreated	0.257542
																				PDK4	0.998086	0.0202806	0.258634				Untreated	0.258634
																				UPP1	0.593136	0.0203174	0.258634				Untreated	0.258634
																				ACSL4	0.816445	0.0203525	0.258634				Untreated	0.258634
																				BTK	-0.942807	0.0203678	0.258634				Untreated	0.258634
																				GNL1	0.664747	0.0205197	0.260196				Untreated	0.260196
																				ZNF280D	0.994827	0.0206683	0.261401				Untreated	0.261401
																				ALDH1B1	-0.947332	0.0206728	0.261401				Untreated	0.261401
																				RASGRP2	-0.904173	0.0207462	0.26196				Untreated	0.26196
																				ENTPD4	0.792869	0.0209851	0.264359				Untreated	0.264359
																				GBF1	-0.587489	0.0210462	0.264359				Untreated	0.264359
																				GALNT11	0.762304	0.0210536	0.264359				Untreated	0.264359
																				STARD4	0.659462	0.021107	0.26466				Untreated	0.26466
																				MTOR	-0.717317	0.0212423	0.265986				Untreated	0.265986
																				UXT	0.567777	0.0214401	0.267719				Untreated	0.267719
																				HPCAL1	0.785439	0.0215604	0.26818				Untreated	0.26818
																				PLSCR3	-0.736885	0.0215905	0.26818				Untreated	0.26818
																				RPL39	0.459779	0.0216047	0.26818				Untreated	0.26818
																				BASP1	0.883746	0.021812	0.27008				Untreated	0.27008
																				GPKOW	-0.919801	0.0218392	0.27008				Untreated	0.27008
																				GASK1B	-0.821625	0.0219097	0.27058				Untreated	0.27058
																				TRPM2	-0.937131	0.0221215	0.272448				Untreated	0.272448
																				COQ9	-1.00767	0.0221971	0.272912				Untreated	0.272912
																				CACYBP	-0.847298	0.0222351	0.272912				Untreated	0.272912
																				VDR	0.730087	0.0222501	0.272912				Untreated	0.272912
																				RNF168	0.551122	0.0224266	0.274639				Untreated	0.274639
																				EIF1	0.594021	0.0224519	0.274639				Untreated	0.274639
																				LYAR	-0.898009	0.0225471	0.27478				Untreated	0.27478
																				IPCEF1	0.887857	0.0225658	0.27478				Untreated	0.27478
																				DYNLL1	-0.768667	0.0225766	0.27478				Untreated	0.27478
																				DKC1	0.64574	0.0227648	0.275917				Untreated	0.275917
																				SLC25A6	0.681737	0.0227709	0.275917				Untreated	0.275917
																				PIK3IP1	-0.857232	0.0228304	0.275983				Untreated	0.275983
																				PET100	0.552617	0.0229028	0.275983				Untreated	0.275983
																				EXOC2	-0.896655	0.0229296	0.275983				Untreated	0.275983
																				TKTL1	0.920825	0.0229692	0.276091				Untreated	0.276091
																				IFIH1	-0.970354	0.0230073	0.27618				Untreated	0.27618
																				KMT2E	0.476802	0.023038	0.27618				Untreated	0.27618
																				WTAP	0.492518	0.0232905	0.278835				Untreated	0.278835
																				ANKFY1	-0.795672	0.0235432	0.279984				Untreated	0.279984
																				FIP1L1	-0.721267	0.0235591	0.279984				Untreated	0.279984
																				KLHDC4	-0.719334	0.0235592	0.279984				Untreated	0.279984
																				VSIG4	-0.989923	0.023573	0.279984				Untreated	0.279984
																				TTLL4	0.777362	0.023685	0.280943				Untreated	0.280943
																				FLNA	0.481609	0.0239022	0.283122				Untreated	0.283122
																				VAMP1	0.826785	0.0239715	0.283157				Untreated	0.283157
																				SUSD6	0.420124	0.0240331	0.283157				Untreated	0.283157
																				EXOSC9	-0.758622	0.0240436	0.283157				Untreated	0.283157
																				LENG8	0.657102	0.0240603	0.283157				Untreated	0.283157
																				TMEM209	-0.857527	0.0240962	0.283209				Untreated	0.283209
																				RPL26L1	-0.83377	0.0242181	0.283548				Untreated	0.283548
																				TXNL4B	0.817587	0.0242196	0.283548				Untreated	0.283548
																				CLEC12A	-0.719999	0.0243157	0.283602				Untreated	0.283602
																				TBC1D32	0.879925	0.0244053	0.283602				Untreated	0.283602
																				ZNF347	-0.926647	0.0244055	0.283602				Untreated	0.283602
																				ARID4A	-0.877674	0.0244193	0.283602				Untreated	0.283602
																				HBEGF	0.577052	0.0244202	0.283602				Untreated	0.283602
																				SKI	0.844131	0.0244527	0.283602				Untreated	0.283602
																				CAPN15	0.934669	0.0244593	0.283602				Untreated	0.283602
																				USPL1	0.780296	0.0245076	0.283602				Untreated	0.283602
																				BTN3A1	-0.733481	0.0245893	0.284181				Untreated	0.284181
																				GNAQ	-0.659267	0.0246901	0.284245				Untreated	0.284245
																				ZNF136	0.785379	0.0247049	0.284245				Untreated	0.284245
																				PRLR	-0.897161	0.0247989	0.284245				Untreated	0.284245
																				MADD	-0.839139	0.0248378	0.284245				Untreated	0.284245
																				TRAPPC12	-0.890422	0.0249238	0.284245				Untreated	0.284245
																				LSG1	0.589099	0.0249603	0.284245				Untreated	0.284245
																				RPH3A	0.878988	0.0249805	0.284245				Untreated	0.284245
																				UBALD2	-0.938047	0.0250308	0.284245				Untreated	0.284245
																				NOP16	0.819101	0.0250344	0.284245				Untreated	0.284245
																				ANKHD1	0.590278	0.0250463	0.284245				Untreated	0.284245
																				NSUN6	-0.907494	0.0251683	0.284352				Untreated	0.284352
																				HK1	-0.553267	0.0251723	0.284352				Untreated	0.284352
																				MAPK10	0.879924	0.0251984	0.284352				Untreated	0.284352
																				MYO7A	-0.944999	0.0252146	0.284352				Untreated	0.284352
																				L3MBTL2	-0.932995	0.0253246	0.284641				Untreated	0.284641
																				ARHGEF7	0.721682	0.0253642	0.284731				Untreated	0.284731
																				SLA	0.694737	0.0253958	0.284731				Untreated	0.284731
																				ABCB8	-0.944643	0.0256146	0.286471				Untreated	0.286471
																				TRIOBP	-0.718991	0.0256773	0.286815				Untreated	0.286815
																				BMP2K	0.858052	0.026267	0.291233				Untreated	0.291233
																				TTC1	-0.851508	0.0264924	0.292859				Untreated	0.292859
																				ZNF646	0.895137	0.0265111	0.292859				Untreated	0.292859
																				KRI1	-0.804955	0.0267968	0.29529				Untreated	0.29529
																				RASA3	0.663261	0.027057	0.297724				Untreated	0.297724
																				ARRB1	-0.725788	0.0270935	0.297724				Untreated	0.297724
																				MYO6	-0.939475	0.0271169	0.297724				Untreated	0.297724
																				PTPRC	-0.588912	0.0271746	0.297994				Untreated	0.297994
																				RAB5IF	-0.618205	0.0273207	0.298868				Untreated	0.298868
																				NHSL1	-0.925113	0.0276093	0.300627				Untreated	0.300627
																				FAM136A	-0.700749	0.027697	0.300627				Untreated	0.300627
																				XRCC1	-0.872348	0.0277184	0.300627				Untreated	0.300627
																				NFATC3	-0.642195	0.0277442	0.300627				Untreated	0.300627
																				EEPD1	0.798143	0.0277773	0.300627				Untreated	0.300627
																				ADAM10	-0.68207	0.027791	0.300627				Untreated	0.300627
																				RPL27A	0.462637	0.0277982	0.300627				Untreated	0.300627
																				STK17B	-0.589266	0.0278154	0.300627				Untreated	0.300627
																				BTF3	0.670592	0.0278568	0.300714				Untreated	0.300714
																				CHD2	0.59202	0.0281525	0.303541				Untreated	0.303541
																				HLA-DRB1	0.608459	0.0282244	0.303704				Untreated	0.303704
																				RAPGEF2	-0.794251	0.0282694	0.303704				Untreated	0.303704
																				SPART	0.680274	0.0282926	0.303704				Untreated	0.303704
																				STX17	-0.788227	0.0283026	0.303704				Untreated	0.303704
																				PGAP6	-0.757761	0.0284599	0.30503				Untreated	0.30503
																				CNOT10	-0.820503	0.0285178	0.305286				Untreated	0.305286
																				ZNF577	0.778725	0.0287526	0.306945				Untreated	0.306945
																				IMPDH2	0.67462	0.0287556	0.306945				Untreated	0.306945
																				RPL35A	0.604425	0.028775	0.306945				Untreated	0.306945
																				JDP2	-0.811196	0.0288555	0.307434				Untreated	0.307434
																				PPHLN1	0.674034	0.0288891	0.307434				Untreated	0.307434
																				GTF2H5	-0.721155	0.0289846	0.307782				Untreated	0.307782
																				C6orf89	-0.61802	0.0290377	0.307782				Untreated	0.307782
																				NFE2	-0.928523	0.0290481	0.307782				Untreated	0.307782
																				FCER1A	0.973037	0.0290587	0.307782				Untreated	0.307782
																				PC	0.93549	0.0291785	0.308689				Untreated	0.308689
																				STRAP	0.705282	0.0292682	0.30878				Untreated	0.30878
																				TPD52L2	0.578049	0.0293566	0.30878				Untreated	0.30878
																				ASXL1	0.820254	0.0293586	0.30878				Untreated	0.30878
																				UGT8	-0.943482	0.0294607	0.309357				Untreated	0.309357
																				WDR45B	0.512281	0.0294822	0.309357				Untreated	0.309357
																				PHACTR2	-0.715072	0.0295618	0.309471				Untreated	0.309471
																				TMEM35B	-0.837852	0.029656	0.310096				Untreated	0.310096
																				CLCC1	-0.774441	0.0301503	0.314534				Untreated	0.314534
																				AHCYL2	-0.894931	0.0304279	0.316696				Untreated	0.316696
																				SCAMP3	-0.797546	0.0304763	0.316834				Untreated	0.316834
																				EIF2S3	0.638742	0.0307714	0.319396				Untreated	0.319396
																				RPS10	0.651349	0.0307937	0.319396				Untreated	0.319396
																				DZIP1	-0.873065	0.030833	0.319436				Untreated	0.319436
																				TCIRG1	-0.617935	0.0308872	0.319629				Untreated	0.319629
																				UNC13D	-0.733221	0.0310104	0.320262				Untreated	0.320262
																				CHCHD7	-0.837646	0.0310493	0.320262				Untreated	0.320262
																				TMEM98	-0.896567	0.0310597	0.320262				Untreated	0.320262
																				HECW1	-0.918265	0.031218	0.320774				Untreated	0.320774
																				MGRN1	0.635332	0.0312979	0.320774				Untreated	0.320774
																				CSF1R	0.433561	0.0313448	0.320774				Untreated	0.320774
																				FHOD1	0.802612	0.0313525	0.320774				Untreated	0.320774
																				IP6K1	0.787602	0.0313582	0.320774				Untreated	0.320774
																				MAEA	0.557275	0.0314253	0.320774				Untreated	0.320774
																				KCTD2	-0.895142	0.0315627	0.321811				Untreated	0.321811
																				STIM2	-0.935721	0.0316594	0.322431				Untreated	0.322431
																				EHD4	0.625158	0.0317702	0.322758				Untreated	0.322758
																				TSPYL1	0.549821	0.031799	0.322758				Untreated	0.322758
																				VENTX	0.739401	0.031951	0.323581				Untreated	0.323581
																				ZNF267	0.53732	0.0319863	0.323581				Untreated	0.323581
																				SSBP1	0.585588	0.0319879	0.323581				Untreated	0.323581
																				TMEM38B	0.884093	0.0321492	0.324377				Untreated	0.324377
																				MCM7	-0.877422	0.032168	0.324377				Untreated	0.324377
																				HDAC8	-0.612312	0.0324924	0.326161				Untreated	0.326161
																				ELK4	0.679109	0.0324965	0.326161				Untreated	0.326161
																				ACAP1	-0.750373	0.0325341	0.326175				Untreated	0.326175
																				SRPK2	-0.716685	0.0326653	0.327073				Untreated	0.327073
																				FBXO6	-0.691195	0.0327582	0.327073				Untreated	0.327073
																				RAB11FIP1	-0.565254	0.0327687	0.327073				Untreated	0.327073
																				DPP7	0.626243	0.0328103	0.327073				Untreated	0.327073
																				VASH1	0.846722	0.0328123	0.327073				Untreated	0.327073
																				GK5	0.563916	0.0329148	0.327288				Untreated	0.327288
																				SPIN1	0.783787	0.0330064	0.327288				Untreated	0.327288
																				PIGG	-0.678192	0.0330087	0.327288				Untreated	0.327288
																				RDH13	-0.743454	0.033045	0.327288				Untreated	0.327288
																				SLC35F6	-0.437507	0.0331542	0.327895				Untreated	0.327895
																				RPS12	0.502848	0.0331964	0.327895				Untreated	0.327895
																				LILRB1	-0.558802	0.0332156	0.327895				Untreated	0.327895
																				P2RX1	0.444561	0.033412	0.329393				Untreated	0.329393
																				APEH	-0.759197	0.0334709	0.329393				Untreated	0.329393
																				R3HDM2	-0.551714	0.0334886	0.329393				Untreated	0.329393
																				CWC22	0.755025	0.0335137	0.329393				Untreated	0.329393
																				SQSTM1	0.620247	0.0336401	0.330274				Untreated	0.330274
																				BTG2	0.556833	0.0338662	0.331771				Untreated	0.331771
																				HIF1A	0.543026	0.034038	0.33273				Untreated	0.33273
																				MKLN1	0.658212	0.0341489	0.333219				Untreated	0.333219
																				CPEB3	-0.931112	0.0341967	0.333219				Untreated	0.333219
																				CTCF	-0.777385	0.0342361	0.333219				Untreated	0.333219
																				RAB8B	0.625398	0.0342923	0.333406				Untreated	0.333406
																				SLC25A20	-0.806809	0.0345113	0.335172				Untreated	0.335172
																				ECH1	-0.641641	0.0347921	0.336924				Untreated	0.336924
																				PCDHA10	0.730353	0.0348039	0.336924				Untreated	0.336924
																				DNAJC10	-0.575557	0.0351906	0.340301				Untreated	0.340301
																				LRRC8D	-0.831493	0.0352922	0.340779				Untreated	0.340779
																				MEFV	-0.626833	0.0353156	0.340779				Untreated	0.340779
																				DELE1	0.595251	0.0354098	0.341322				Untreated	0.341322
																				PFDN1	0.574692	0.0356038	0.342825				Untreated	0.342825
																				ERGIC3	0.598208	0.0356951	0.342934				Untreated	0.342934
																				GDI1	0.553126	0.0357023	0.342934				Untreated	0.342934
																				CHST11	0.702357	0.0357295	0.342934				Untreated	0.342934
																				DENND5A	0.586795	0.0357837	0.343023				Untreated	0.343023
																				PRG2	0.928758	0.0358149	0.343023				Untreated	0.343023
																				NUMB	0.584056	0.0359114	0.343582				Untreated	0.343582
																				ARL5A	-0.910472	0.0359499	0.343585				Untreated	0.343585
																				SNX1	-0.588197	0.0360118	0.343812				Untreated	0.343812
																				C6orf62	0.470567	0.0362756	0.345597				Untreated	0.345597
																				KCTD10	0.763849	0.0365368	0.347385				Untreated	0.347385
																				NUDCD2	-0.75676	0.0366064	0.347645				Untreated	0.347645
																				SMG9	0.580191	0.0367099	0.347894				Untreated	0.347894
																				RPS7	0.578201	0.0368064	0.34829				Untreated	0.34829
																				SUB1	0.458418	0.036829	0.34829				Untreated	0.34829
																				RBBP7	0.705616	0.0369799	0.34935				Untreated	0.34935
																				SERPINF1	-0.824053	0.0372011	0.350256				Untreated	0.350256
																				CSF2RA	0.538357	0.0372315	0.350256				Untreated	0.350256
																				TMCO3	0.614701	0.0373545	0.351047				Untreated	0.351047
																				RPRD1A	0.812813	0.0374165	0.351262				Untreated	0.351262
																				TP53INP2	0.630688	0.03758	0.351563				Untreated	0.351563
																				ATXN7L1	-0.874294	0.0376052	0.351563				Untreated	0.351563
																				DNAJB5	0.846257	0.0377009	0.351563				Untreated	0.351563
																				ABR	-0.46282	0.037764	0.351563				Untreated	0.351563
																				FAHD1	-0.871629	0.0378062	0.351563				Untreated	0.351563
																				NIPBL	0.480642	0.0378412	0.351563				Untreated	0.351563
																				CDH7	-0.889382	0.0378528	0.351563				Untreated	0.351563
																				NPRL3	-0.892756	0.0378658	0.351563				Untreated	0.351563
																				PAK1	-0.60776	0.037878	0.351563				Untreated	0.351563
																				ERMAP	0.754865	0.0379468	0.351645				Untreated	0.351645
																				C16orf72	0.468365	0.0379686	0.351645				Untreated	0.351645
																				ZBTB1	0.673731	0.038004	0.351645				Untreated	0.351645
																				RAPH1	0.884268	0.0381138	0.351681				Untreated	0.351681
																				PRXL2C	-0.482045	0.0381251	0.351681				Untreated	0.351681
																				DCAF7	-0.65622	0.0381953	0.351901				Untreated	0.351901
																				SEC61G	0.615145	0.0382684	0.351901				Untreated	0.351901
																				PSMA4	-0.590475	0.0382771	0.351901				Untreated	0.351901
																				LETM1	-0.606839	0.0383053	0.351901				Untreated	0.351901
																				RPS27L	-0.572809	0.038479	0.353136				Untreated	0.353136
																				DPH1	0.861114	0.0385917	0.353251				Untreated	0.353251
																				ECE1	0.645324	0.0386463	0.353251				Untreated	0.353251
																				ELAC2	-0.779056	0.0386484	0.353251				Untreated	0.353251
																				AK2	-0.704143	0.0387585	0.353897				Untreated	0.353897
																				RIN1	-0.852763	0.038808	0.353991				Untreated	0.353991
																				MTCH1	0.581655	0.0388874	0.354355				Untreated	0.354355
																				DCPS	-0.790736	0.0391398	0.356295				Untreated	0.356295
																				COG1	0.829178	0.0393102	0.357123				Untreated	0.357123
																				NR2C2	0.836959	0.0395496	0.358393				Untreated	0.358393
																				UBE2F	-0.596675	0.0395693	0.358393				Untreated	0.358393
																				GSDMD	-0.764846	0.0396979	0.358836				Untreated	0.358836
																				SNX4	-0.897551	0.0397778	0.358966				Untreated	0.358966
																				OR51M1	-0.834783	0.039792	0.358966				Untreated	0.358966
																				CCNT2	0.687586	0.0398928	0.359514				Untreated	0.359514
																				SEC61B	0.532157	0.0400711	0.360107				Untreated	0.360107
																				PI4K2A	0.498028	0.0400727	0.360107				Untreated	0.360107
																				KLHDC7B	-0.855185	0.0401018	0.360107				Untreated	0.360107
																				TMEM63A	-0.833663	0.0401186	0.360107				Untreated	0.360107
																				LAPTM5	0.567175	0.0401799	0.360188				Untreated	0.360188
																				AARS2	-0.776303	0.0402076	0.360188				Untreated	0.360188
																				RARA	0.58242	0.0403715	0.361297				Untreated	0.361297
																				RPS28	0.472933	0.0406966	0.362737				Untreated	0.362737
																				UBE4B	-0.677703	0.040712	0.362737				Untreated	0.362737
																				DEPDC5	-0.699975	0.0407456	0.362737				Untreated	0.362737
																				KIF6	-0.735151	0.0407668	0.362737				Untreated	0.362737
																				ATP8B4	0.840806	0.0407742	0.362737				Untreated	0.362737
																				RNF5	-0.718459	0.0409998	0.364131				Untreated	0.364131
																				TMEM18	0.779232	0.0410117	0.364131				Untreated	0.364131
																				TMEM248	-0.622504	0.0412072	0.365067				Untreated	0.365067
																				GPBP1	0.58332	0.0412113	0.365067				Untreated	0.365067
																				RNF31	-0.792683	0.0413042	0.365067				Untreated	0.365067
																				NSD1	0.490008	0.0413363	0.365067				Untreated	0.365067
																				VNN3	-0.889143	0.0413652	0.365067				Untreated	0.365067
																				CLEC7A	0.472499	0.0414328	0.365067				Untreated	0.365067
																				RAB40C	-0.807522	0.0414342	0.365067				Untreated	0.365067
																				MAPKBP1	-0.78648	0.0414757	0.365067				Untreated	0.365067
																				KCNAB3	-0.868551	0.0414821	0.365067				Untreated	0.365067
																				PSTPIP2	-0.585637	0.0417839	0.366728				Untreated	0.366728
																				PUM3	0.844141	0.0417979	0.366728				Untreated	0.366728
																				WASHC4	-0.665924	0.0418188	0.366728				Untreated	0.366728
																				ATP10D	-0.829698	0.0418745	0.366728				Untreated	0.366728
																				TTC22	0.843118	0.0419443	0.366982				Untreated	0.366982
																				ADPRHL1	0.845909	0.0420219	0.367304				Untreated	0.367304
																				ZFP36L2	-0.75305	0.0421051	0.367365				Untreated	0.367365
																				CHMP3	0.588882	0.0421723	0.367365				Untreated	0.367365
																				SNTB1	-0.763651	0.0421932	0.367365				Untreated	0.367365
																				FAM126B	-0.60896	0.0422099	0.367365				Untreated	0.367365
																				DECR1	-0.72117	0.0422329	0.367365				Untreated	0.367365
																				TRIM44	-0.535451	0.0422805	0.367424				Untreated	0.367424
																				TMEM154	-0.697509	0.0424392	0.36818				Untreated	0.36818
																				FCGR1A	-0.802125	0.0424493	0.36818				Untreated	0.36818
																				FAM53B	-0.752272	0.0425627	0.368809				Untreated	0.368809
																				POLR3H	-0.853097	0.0429528	0.370974				Untreated	0.370974
																				PCYOX1	-0.791948	0.0431133	0.370974				Untreated	0.370974
																				CYTIP	0.442402	0.0431342	0.370974				Untreated	0.370974
																				SERGEF	-0.842392	0.0431423	0.370974				Untreated	0.370974
																				SLFN5	-0.720248	0.0433162	0.371884				Untreated	0.371884
																				CTRL	-0.823121	0.0433307	0.371884				Untreated	0.371884
																				PDCD6IP	0.661029	0.0434657	0.372253				Untreated	0.372253
																				GDPGP1	0.70636	0.0435099	0.372253				Untreated	0.372253
																				VCL	-0.579984	0.0435103	0.372253				Untreated	0.372253
																				RGS10	0.589446	0.043539	0.372253				Untreated	0.372253
																				YAF2	0.618813	0.0436638	0.372799				Untreated	0.372799
																				ABCC10	-0.844654	0.0437729	0.372799				Untreated	0.372799
																				VARS1	-0.710214	0.0437791	0.372799				Untreated	0.372799
																				CXXC5	0.69415	0.0438314	0.372799				Untreated	0.372799
																				POU2F2	-0.785329	0.043849	0.372799				Untreated	0.372799
																				SRGAP2	-0.595243	0.0438514	0.372799				Untreated	0.372799
																				RINL	-0.748292	0.0439046	0.372899				Untreated	0.372899
																				TIMM22	0.793747	0.044306	0.375693				Untreated	0.375693
																				CHCHD3	-0.583454	0.0443202	0.375693				Untreated	0.375693
																				RPS18	0.49043	0.0443587	0.375693				Untreated	0.375693
																				PNPLA1	0.762863	0.0446008	0.377254				Untreated	0.377254
																				PFDN5	0.406675	0.044644	0.377254				Untreated	0.377254
																				RHBDF2	-0.615047	0.0446687	0.377254				Untreated	0.377254
																				CDK16	-0.813664	0.0447796	0.377836				Untreated	0.377836
																				ACSL5	0.57825	0.0448603	0.378162				Untreated	0.378162
																				SLC12A9	-0.829355	0.0451156	0.379959				Untreated	0.379959
																				RAP1A	-0.754314	0.0452407	0.379967				Untreated	0.379967
																				SHQ1	-0.826386	0.0452432	0.379967				Untreated	0.379967
																				SHCBP1	-0.695585	0.0454386	0.381253				Untreated	0.381253
																				ZNF740	-0.863961	0.0455877	0.382147				Untreated	0.382147
																				PNPT1	-0.565893	0.0456797	0.382398				Untreated	0.382398
																				UQCC1	-0.672261	0.0457026	0.382398				Untreated	0.382398
																				WDR61	-0.748863	0.0458224	0.382702				Untreated	0.382702
																				GPR161	0.805729	0.0458549	0.382702				Untreated	0.382702
																				RPL8	0.495497	0.0458987	0.382702				Untreated	0.382702
																				SP1	-0.583328	0.04593	0.382702				Untreated	0.382702
																				PAG1	-0.552056	0.0459717	0.382702				Untreated	0.382702
																				TPST2	-0.681123	0.045994	0.382702				Untreated	0.382702
																				DNMT3A	0.777049	0.046139	0.383554				Untreated	0.383554
																				PTCD2	-0.827041	0.046345	0.384768				Untreated	0.384768
																				ZNF766	-0.63776	0.0463705	0.384768				Untreated	0.384768
																				RGS14	-0.86749	0.0470853	0.389364				Untreated	0.389364
																				PRF1	0.899973	0.0470974	0.389364				Untreated	0.389364
																				PLEKHG3	-0.729128	0.0471843	0.389638				Untreated	0.389638
																				TTC7A	-0.484688	0.0472662	0.389638				Untreated	0.389638
																				MCTS1	-0.558452	0.0473045	0.389638				Untreated	0.389638
																				TMEM234	-0.7685	0.0473557	0.389638				Untreated	0.389638
																				SMIM15	0.725282	0.0473943	0.389638				Untreated	0.389638
																				TM9SF3	0.526375	0.0474377	0.389638				Untreated	0.389638
																				KLHDC3	-0.743654	0.0475019	0.389638				Untreated	0.389638
																				ARFRP1	0.690141	0.0475635	0.38964				Untreated	0.38964
																				PEX16	-0.696567	0.0476432	0.389938				Untreated	0.389938
																				EIF5	0.462294	0.0476994	0.390043				Untreated	0.390043
																				ESYT1	-0.557975	0.0477545	0.39014				Untreated	0.39014
																				SEMA4B	-0.859371	0.0478417	0.390467				Untreated	0.390467
																				TMEM104	0.60198	0.0479178	0.390467				Untreated	0.390467
																				PTDSS1	0.583176	0.0479246	0.390467				Untreated	0.390467
																				STK36	-0.857254	0.0480901	0.390618				Untreated	0.390618
																				CMTM6	0.530596	0.0480908	0.390618				Untreated	0.390618
																				RAB5A	0.596554	0.0481118	0.390618				Untreated	0.390618
																				CD84	0.809721	0.0481333	0.390618				Untreated	0.390618
																				SNRPB	0.486683	0.0481814	0.390618				Untreated	0.390618
																				PRKD2	-0.767769	0.0482342	0.390618				Untreated	0.390618
																				EPG5	-0.682174	0.0482561	0.390618				Untreated	0.390618
																				PLB1	-0.684706	0.0485066	0.391932				Untreated	0.391932
																				PARP15	-0.691935	0.0485399	0.391932				Untreated	0.391932
																				TRIM8	-0.669643	0.0486198	0.391989				Untreated	0.391989
																				CLIP4	0.699718	0.0486651	0.391989				Untreated	0.391989
																				TRIP11	0.69376	0.0486775	0.391989				Untreated	0.391989
																				RAMAC	0.6708	0.048807	0.392317				Untreated	0.392317
																				OFD1	-0.7604	0.0488253	0.392317				Untreated	0.392317
																				NECAP2	-0.65802	0.0488489	0.392317				Untreated	0.392317
																				FOXO1	0.709551	0.0489656	0.392773				Untreated	0.392773
																				RHBDL3	0.736504	0.048993	0.392773				Untreated	0.392773
																				ANKS1A	-0.78459	0.0490639	0.392991				Untreated	0.392991
																				IL6R	0.646118	0.049257	0.394033				Untreated	0.394033
																				RAB37	0.667682	0.0492815	0.394033				Untreated	0.394033
																				SURF4	0.475073	0.0493372	0.394129				Untreated	0.394129
																				ITPK1	-0.602947	0.0496233	0.395737				Untreated	0.395737
																				IQSEC2	-0.72373	0.0496658	0.395737				Untreated	0.395737
																				OXA1L	0.457937	0.0497051	0.395737				Untreated	0.395737
																				N4BP2L1	-0.716159	0.0497144	0.395737				Untreated	0.395737
																				PCBP2	0.454244	0.0497985	0.395974				Untreated	0.395974
																				MAT2B	-0.756217	0.049885	0.396029				Untreated	0.396029
																				C2	-0.769567	0.0499546	0.396029				Untreated	0.396029
																				METTL5	-0.687686	0.049971	0.396029				Untreated	0.396029
