# Supplementary material for: Nasal anti-CD3 mAb (Foralumab) dampens CD3+ T effector function and decreases NKG7 in COVID-19 through a mechanism involving GIMAP-7 and TGFb1
Source: Research Square preprint supplement (doi:10.21203/rs.3.rs-2061549/v1), 2022-10-13
Supplement: Supplementary file 2 [file 16fa95fee356df7dc5518aa3.xlsx]

## Sheet: Sheet1
Expanded data 2 : cell type markers for CD3+ population stratification
CD4 Naïve				CD4 TEMRA
gene	p_val	avg_log2FC		gene	p_val	avg_log2FC
CCR7	0	1.22173		GZMH	0	1.67378
LEF1	0	1.16469		FGFBP2	5.797e-293	1.49075
TCF7	0	0.944224		CCL4	3.293e-172	1.338
FHIT	0	0.922926		EFHD2	2.66e-179	1.21173
SELL	0	0.862085		SPON2	1.657e-144	1.14622
NOSIP	0	0.844187		NKG7	2.607e-168	1.14106
PRKCQ-AS1	0	0.834685		GNLY	2.1203e-75	1.11352
MAL	0	0.779577		S100A4	5.463e-150	1.07087
IL6ST	0	0.775003		ZEB2	4.545e-168	1.06253
TRABD2A	0	0.7228		GZMA	1.152e-140	1.02435
EEF1B2	0	0.718406		LGALS1	1.803e-103	0.958021
CHRM3-AS2	0	0.717433		PRF1	7.335e-131	0.944353
GAS5	0	0.713356		BHLHE40	2.683e-86	0.932983
TGFBR2	7.012e-258	0.704866		HOPX	1.327e-114	0.921476
LINC00861	1.542e-207	0.696647		CD99	2.199e-136	0.917052
EEF1G	0	0.687578		ITGB1	1.8847e-88	0.859886
PIK3IP1	1.959e-252	0.686489		CD320	6.4485e-98	0.846287
GIMAP5	9.32e-209	0.665602		SH3BGRL3	1.22e-136	0.839661
TSHZ2	0	0.664637		S1PR5	6.83e-125	0.837821
SNHG29	0	0.662616		CD4	1.037e-112	0.830611
RCAN3	2.642e-256	0.661488		CST7	5.868e-126	0.8198
LDHB	0	0.658726		CCL5	9.504e-113	0.818187
BACH2	1.093e-286	0.658235		TGFBR3	4.4857e-86	0.817929
RGS10	9.747e-250	0.65482		NFKBIA	2.094e-45	0.80963
ACTN1	0	0.6458		MYBL1	7.6741e-82	0.805049
CD8 CM				CD8 EM
GZMK	3.272e-152	1.44086		CD8A	0	1.60267
CD8B	1.748e-162	0.942261		CCL5	0	1.53098
NR4A2	2.9418e-60	0.930036		NKG7	0	1.46017
NELL2	3.3858e-89	0.769716		GZMH	0	1.42107
DUSP2	2.0572e-48	0.735493		GZMA	0	1.31307
CXCR3	2.367e-71	0.729726		FGFBP2	0	1.25715
LINC02446	9.3027e-77	0.7283		CCL4	1.513e-278	1.23411
ZNF331	6.1284e-44	0.718342		CST7	0	1.20177
CD8A	1.272e-123	0.712873		CD8B	1.733e-296	1.14608
EZR	6.885e-46	0.660835		GZMK	3.243e-128	1.14439
KLRK1	4.7677e-84	0.627522		HLA-DRB1	0	1.13074
JUN	3.243e-28	0.619862		CD74	3.711e-229	1.11912
FAM177A1	7.821e-24	0.573218		DUSP2	3.052e-212	1.07227
YBX3	1.8014e-69	0.571232		GNLY	2.248e-193	1.02212
LSR	4.0809e-50	0.554075		GZMB	1.756e-206	0.996601
ZFP36L2	4.5607e-47	0.55397		HLA-DPB1	3.88e-268	0.987615
COTL1	1.2288e-51	0.548238		HLA-DPA1	9.814e-264	0.954656
LYAR	4.0468e-40	0.546154		METRNL	1.951e-201	0.925094
FOS	5.8808e-20	0.540389		ZEB2	4.216e-293	0.915155
CLDND1	1.2566e-32	0.540237		EFHD2	2.391e-236	0.900928
PASK	3.0599e-33	0.537746		GZMM	5.992e-228	0.874375
JUND	7.6069e-36	0.518718		CTSW	7.844e-238	0.854254
JUNB	1.2189e-28	0.51009		C12orf75	2.543e-209	0.845765
CXCR4	1.0778e-30	0.496085		PRF1	4.478e-259	0.830144
GABARAPL1	3.3168e-25	0.480578		CMC1	8.7147e-93	0.811941
CD8 Naïve				CD8 TEMRA
LINC02446	0	2.1472		GNLY	0	2.25566
CD8B	0	1.74284		NKG7	0	2.22543
NELL2	0	1.16761		GZMH	0	2.14807
LEF1	0	1.13309		GZMB	0	2.10759
ACTN1	0	1.08828		CD8A	0	1.91161
AIF1	0	0.988675		FGFBP2	0	1.90061
CCR7	1.385e-297	0.979881		CST7	0	1.85976
LRRN3	0	0.817385		PRF1	0	1.8263
S100B	0	0.786447		CCL5	0	1.81052
CD248	0	0.785848		KLRD1	0	1.72358
NUCB2	4.993e-164	0.730235		CTSW	0	1.66967
TRABD2A	2.909e-210	0.722172		GZMA	0	1.58375
OXNAD1	6.136e-163	0.712585		EFHD2	0	1.5378
RGS10	1.049e-160	0.701902		FCGR3A	0	1.32581
TGFBR2	1.417e-136	0.689474		KLRK1	0	1.31595
NT5E	0	0.687159		ADGRG1	0	1.30678
PRKCQ-AS1	2.208e-145	0.672317		ZEB2	0	1.30422
GAS5	5.703e-200	0.668166		CCL4	0	1.30265
LDLRAP1	4.452e-145	0.664996		LGALS1	0	1.28988
SELL	6.316e-162	0.652641		FCRL6	0	1.28296
PCED1B	2.682e-122	0.636101		PLEK	0	1.27325
EEF1B2	4.636e-272	0.63057		CD8B	0	1.25374
TCF7	1.114e-151	0.624425		KLRC2	0	1.20205
PDE3B	4.715e-112	0.624351		CX3CR1	0	1.19513
ABLIM1	7.762e-131	0.619326		ZNF683	0	1.11817
MAIT				NK-like cells
KLRB1	4.863e-242	2.37766		CCL4	1.3029e-43	3.29179
GZMK	0	1.91532		SPON2	1.1373e-81	2.95353
CEBPD	0	1.63754		TYROBP	2.595e-215	2.90803
TRAV1-2	0	1.55664		FCER1G	0	2.83423
DUSP2	3.6221e-53	1.23591		GZMB	1.2136e-62	2.77539
DUSP1	4.5558e-42	1.19609		GNLY	1.0038e-57	2.61734
SLC4A10	0	1.11514		PRF1	5.8821e-54	2.59615
NCR3	6.512e-121	1.09949		CLIC3	3.8236e-78	2.51694
PHACTR2	8.1207e-98	1.02118		FCGR3A	4.6536e-83	2.48267
BHLHE40	1.4591e-54	0.996874		CCL3	7.9215e-62	2.35471
ERN1	1.2044e-73	0.987505		FGFBP2	1.9895e-46	2.16767
NFKBIA	3.5715e-31	0.962244		KLRD1	1.4726e-60	2.12989
SLC7A5	1.3943e-43	0.954539		MYOM2	2.3317e-71	2.1119
TNFAIP3	6.6614e-35	0.918453		NKG7	1.6433e-46	2.06747
IL7R	1.1573e-62	0.904829		KLRF1	8.809e-118	2.01909
GPR65	2.2838e-54	0.882786		CTSW	7.3705e-37	1.8473
MYBL1	4.4552e-76	0.878514		EFHD2	1.2799e-39	1.83373
CCR6	3.275e-119	0.855872		CST7	4.2109e-39	1.82671
ID2	1.0818e-43	0.828178		IL2RB	1.0033e-39	1.80919
ZBTB16	1.474e-174	0.827313		SH2D1B	0	1.76545
CXCR6	4.395e-208	0.802419		GZMA	1.0992e-33	1.67556
KLRG1	1.5544e-48	0.790059		CD247	1.4429e-37	1.6626
SPOCK2	1.2453e-49	0.789537		XCL2	9.0829e-28	1.61939
PDE4D	5.05e-29	0.782218		HOPX	9.3148e-33	1.60234
AQP3	4.3641e-30	0.779921		MAP3K8	1.9569e-30	1.5996
NonVD2 GD				Thelper
TRDV1	0	2.64182		LTB	0	1.16698
GNLY	0	2.2732		AQP3	0	0.901545
TRDV2	0	2.04072		TNFRSF4	0	0.887965
NKG7	0	2.0223		GPR183	0	0.836493
GZMB	0	1.97968		IL7R	0	0.764616
TRGV9	4.73e-225	1.95428		PLP2	0	0.73375
TRDC	0	1.93109		FTH1	0	0.716894
KLRD1	0	1.87703		VIM	0	0.675157
CCL4	0	1.84641		JUNB	3.399e-212	0.672438
PRF1	0	1.82351		S100A11	6.992e-276	0.669781
CST7	0	1.80317		FXYD5	0	0.6614
CCL5	0	1.77392		ARHGAP15	4.871e-298	0.652817
FCGR3A	0	1.69073		SOCS3	2.017e-236	0.634323
GZMH	0	1.65896		TRADD	4.693e-248	0.619939
CTSW	0	1.63253		INPP4B	1.087e-239	0.606148
KLRC2	0	1.5769		FOS	2.159e-103	0.602617
TYROBP	0	1.48124		SLC2A3	3.748e-162	0.597834
EFHD2	0	1.46185		TIMP1	2.11e-234	0.584029
ADGRG1	0	1.38519		MAL	9.3e-255	0.575434
FGFBP2	3.644e-236	1.34453		RNASET2	4.901e-241	0.562418
ZEB2	0	1.30988		RILPL2	8.456e-221	0.559825
GZMA	3.005e-273	1.30883		CD4	3.376e-297	0.55864
S1PR5	0	1.24989		ITGB1	8.937e-208	0.552994
KLRK1	2.491e-280	1.229		GSTK1	6.243e-260	0.548833
HOPX	1.606e-239	1.21431		ZFP36L2	2.479e-189	0.541485
Tregs				Gamma-deltas
FOXP3	0	1.42205		TRDV2	0	2.34212
RTKN2	0	1.06695		TRGV9	0	1.88822
SESN3	4.8552e-85	0.839407		GZMK	3.803e-276	1.64015
IL2RA	2.135e-272	0.838046		DUSP2	1.241e-148	1.17141
CTLA4	1.827e-160	0.73936		CCL5	2.487e-200	1.06386
ARID5B	5.7531e-58	0.697213		TRDC	6.738e-244	1.05559
RGS1	3.9168e-48	0.696326		KLRB1	4.649e-117	1.03831
DUSP4	7.2921e-65	0.6869		GNLY	2.6201e-88	0.990753
STAM	1.1322e-89	0.659683		GZMA	3.271e-162	0.924351
CORO1B	7.7097e-43	0.65143		KLRD1	4.261e-117	0.913088
BIRC3	1.4489e-56	0.647241		KLRG1	2.165e-122	0.89404
SELL	2.4171e-60	0.642198		METRNL	8.4045e-94	0.87196
IKZF2	4.206e-121	0.61265		CST7	1.112e-176	0.865496
CCR4	5.6843e-87	0.611167		LYAR	4.372e-126	0.844409
GPR183	5.9828e-47	0.573624		NKG7	7.158e-169	0.82834
PIM2	2.655e-41	0.555291		CXCR3	9.398e-107	0.826854
SAMHD1	7.7074e-41	0.542425		SLC7A5	6.443e-56	0.781716
CD27	1.342e-51	0.539651		MAP3K8	1.7559e-93	0.766237
TIGIT	1.1926e-60	0.538861		MATK	7.591e-121	0.754969
LTB	2.4809e-63	0.531758		CTSW	1.176e-130	0.752253
PBXIP1	9.5363e-29	0.525902		CCL4	4.4729e-51	0.738067
GATA3	2.5214e-20	0.510213		HOPX	4.3832e-91	0.730813
CD28	8.0455e-50	0.509024		AUTS2	2.8722e-94	0.718863
CLDND1	4.6953e-29	0.504267		KLRK1	7.0334e-78	0.7182
IL10RA	2.1238e-26	0.495879		GZMM	2.653e-104	0.683406
