# Supplementary material for: Nasal anti-CD3 mAb (Foralumab) dampens CD3+ T effector function and decreases NKG7 in COVID-19 through a mechanism involving GIMAP-7 and TGFb1
Source: Research Square preprint supplement (doi:10.21203/rs.3.rs-2061549/v1), 2022-10-13
Supplement: Supplementary file 3 [file 5044f0919368aef18dccaddb.xlsx]

## Sheet: Sheet1
Supplementary Table 4: Ingenuity Pathway Analysis on DEGs in Foralumab subjects (baseline vs. treatment)
Ingenuity Pathway	-log(p-value)	Molecules
T cells
Coronavirus Pathogenesis Pathway	17	BST2,CASP1,EEF1A1,FOS,IRF7,IRF9,KPNB1,NUP98,OAS3,PIK3C3,RPS11,RPS13,RPS14,RPS15A,RPS16,RPS18,RPS23,RPS25,RPS27A,RPS4X,RPS5,RPS8,RPSA,STAT1,STAT2,TP53,TRIM25
EIF2 Signaling	16.9	AKT3,EIF3E,EIF3L,PABPC1,PAIP1,PIK3C3,RPL10,RPL13A,RPL17,RPL29,RPL5,RPL7A,RPL8,RPL9,RPS11,RPS13,RPS14,RPS15A,RPS16,RPS18,RPS23,RPS25,RPS27A,RPS4X,RPS5,RPS8,RPSA,SREBF1
Role of Hypercytokinemia/hyperchemokinemia in the Pathogenesis of Influenza	6.12	CASP1,CCL4,IFIT2,IFIT3,IRF7,IRF9,OAS3,RSAD2,STAT1,STAT2
Interferon Signaling	4.8	IFIT1,IFIT3,IRF9,STAT1,STAT2,TAP1
UVA-Induced MAPK Signaling	3.89	FOS,PARP14,PARP2,PARP9,PIK3C3,PLCG1,STAT1,TP53
CSDE1 Signaling Pathway	3.68	AKT3,FOS,PABPC1,PABPN1,PAIP1,RPL9
Activation of IRF by Cytosolic Pattern Recognition Receptors	3.33	IFIT2,IRF7,IRF9,STAT1,STAT2,ZBP1
NAD Signaling Pathway	3.27	AKT3,CD38,PARP14,PARP2,PARP9,PIK3C3,POLR2A,SREBF1,TP53
HER-2 Signaling in Breast Cancer	3.11	AKT3,COX4I1,FGR,FOS,KPNB1,NUP85,NUP93,NUP98,PIK3C3,PLCG1,TP53
AMPK Signaling	2.86	ACACB,AK2,AKT3,ARID1A,ARID2,EEF2,PFKFB3,PFKP,PIK3C3,PPM1K,RAB11A
EGF Signaling	2.82	AKT3,FOS,PIK3C3,PLCG1,STAT1
Monocytes
Glucocorticoid Receptor Signaling	5.72	ARID2,CCL3,CCNH,GTF2H1,HLA-DQA1,IL1R2,IRF3,JAK1,MAPK13,MED1,MT-CYB,MT-ND1,MT-ND3,MT-ND4L,MT-ND5,NDUFA9,NFKBIA,PCK2,PIK3R4,POLR2B,PRKAG2,SERPINE1,SMAD4,TGFB1,TLR2,TNF
IL-10 Signaling	4.77	HMOX1,IL1R2,JAK1,MAP4K4,MAPK13,NFKBIA,SOCS3,TNF
Coronavirus Pathogenesis Pathway	4.68	ABL1,ADAM9,CASP1,DPP9,EIF2AK3,IRF3,JAK1,MAPK13,NFKBIA,NLRP3,SERPINE1,SMAD4,TGFB1
Oxidative Phosphorylation	4.19	MT-CO1,MT-CO2,MT-CO3,MT-CYB,MT-ND1,MT-ND3,MT-ND4L,MT-ND5,NDUFA9
Role of Pattern Recognition Receptors in Recognition of Bacteria and Viruses	3.74	CASP1,IL15,IRF3,NLRP3,PIK3R4,TGFB1,TLR2,TNF,TNFSF13B,TNFSF14
IL-6 Signaling	3.72	CEBPB,IL1R2,MAP4K4,MAPK13,MCL1,NFKBIA,PIK3R4,SOCS3,TNF
Role of Hypercytokinemia/hyperchemokinemia in the Pathogenesis of Influenza	3.39	AREG,CASP1,CCL3,IRF3,JAK1,NLRP3,TNF
Inhibition of ARE-Mediated mRNA Degradation Pathway	2.99	MAPK13,PPM1L,PRKAG2,PSMB10,PSMB8,PSMD14,TNF,TNFSF13B,TNFSF14
Role of PKR in Interferon Induction and Antiviral Response	2.85	CASP1,IRF3,JAK1,MAPK13,METAP2,NFKBIA,NLRP3,TNF
Toll-like Receptor Signaling	2.85	MAP4K4,MAPK13,NFKBIA,TLR2,TNF,TNFAIP3
B cells
Valine Degradation I	2.56	BCAT2,BCKDHB,HSD17B4
IL-4 Signaling	2.05	FCER2,HLA-DOA,HLA-DOB,IL4R,IRF4
B Cell Receptor Signaling	1.88	EGR1,GAB2,IGHV1-3,IGHV2-26,IGHV3-13,IGHV3-20,IGHV3-72,IGHV5-51,IGKV1-6,IGKV3-15,IGKV4-1,IGLV2-11,IGLV3-10,IGLV4-69,IGLV5-45,IGLV6-57
IL-15 Signaling	1.85	IGHV1-3,IGHV2-26,IGHV3-13,IGHV3-20,IGHV3-72,IGHV5-51,IGKV1-6,IGKV3-15,IGKV4-1,IGLV2-11,IGLV3-10,IGLV4-69,IGLV5-45,IGLV6-57
negative log (-log) shows downregulation of a pathway
