# Supplementary material for: Nasal anti-CD3 mAb (Foralumab) dampens CD3+ T effector function and decreases NKG7 in COVID-19 through a mechanism involving GIMAP-7 and TGFb1
Source: Research Square preprint supplement (doi:10.21203/rs.3.rs-2061549/v1), 2022-10-13
Supplement: Supplementary file 4 [file 585f402a140600b6c3533953.xlsx]

## Sheet: Sheet1
Expanded data 3: DEG comparison of untreated controls and Foralumab on day 10 (left) and differentially expressed genes (DEGs) comparison between untreated controls and foralumab at baseline (day-2) versus follow up (day 10) (right)
gene	p_val	avg_log2FC	pct.1	pct.2	p_val_adj			Day2	Day10.untreated	Day10.aCD3
NKG7	1.05791e-65	-1.03519	0.237	0.413	3.87207e-61		SDF4	1.0368	0.853017	0.654398
DUSP2	3.00268e-125	-1.02974	0.598	0.769	1.09901e-120		AURKAIP1	1.1439	1.03826	0.767574
IL32	0	-0.97925	0.805	0.964	0		MRPL20	1.02056	0.873824	0.74909
GZMA	1.85018e-94	-0.977313	0.171	0.371	6.77183e-90		SSU72	1.60758	1.24694	1.09432
PRF1	2.04128e-87	-0.970983	0.134	0.318	7.47128e-83		RER1	0.76271	0.47265	0.354148
CST7	2.69861e-77	-0.968324	0.311	0.491	9.87719e-73		KCNAB2	0.645372	0.500565	0.393778
FGFBP2	2.1239e-51	-0.927813	0.121	0.251	7.7737e-47		TNFRSF25	0.435245	0.508829	0.963873
GZMH	1.31585e-52	-0.899832	0.149	0.289	4.81616e-48		PARK7	1.95968	1.62493	1.48552
NR4A2	1.21249e-87	-0.747273	0.512	0.677	4.43785e-83		ENO1	2.61485	2.0235	1.768
CCL5	3.33672e-53	-0.743487	0.321	0.484	1.22127e-48		TNFRSF1B	1.46588	1.37068	0.96107
NFKBIA	4.38418e-128	-0.740812	0.81	0.89	1.60465e-123		EFHD2	4.36565	2.43102	1.50094
FOS	1.29949e-10	-0.704786	0.461	0.495	4.75625e-06		SZRD1	0.623925	0.468984	0.399022
UCP2	5.27364e-131	-0.678765	0.43	0.654	1.9302e-126		CAPZB	3.4544	2.99526	2.5734
CD69	3.39587e-60	-0.677885	0.695	0.781	1.24292e-55		DDOST	1.66718	1.38548	1.20386
IRF1	1.74984e-80	-0.67024	0.549	0.697	6.40458e-76		HP1BP3	2.12024	1.80263	1.37357
DUSP1	1.09132e-45	-0.645993	0.661	0.75	3.99434e-41		CDC42	4.01684	3.17681	3.30209
CD52	1.47236e-174	-0.635057	0.924	0.966	5.38899e-170		HNRNPR	1.5677	1.41716	1.20203
CTSW	1.8189e-53	-0.624499	0.393	0.543	6.65734e-49		RCAN3	1.03294	1.44023	1.75755
ANXA1	9.23074e-71	-0.616673	0.5	0.65	3.37854e-66		RUNX3	1.29226	1.01096	0.71793
IL2RG	7.54482e-131	-0.597276	0.659	0.83	2.76148e-126		RSRP1	2.0911	1.75417	1.55103
DUSP5	6.68689e-70	-0.592929	0.174	0.343	2.44747e-65		SYTL1	1.45371	1.13854	0.864399
HCST	4.74455e-100	-0.585938	0.704	0.837	1.73655e-95		WASF2	1.44476	1.27091	1.0447
HOPX	2.66119e-54	-0.568586	0.138	0.278	9.74022e-50		IFI6	2.68916	0.570661	0.455794
TAGLN2	6.52979e-91	-0.544386	0.694	0.814	2.38997e-86		DNAJC8	1.26231	1.04145	0.919631
RAC2	6.29189e-103	-0.539669	0.706	0.829	2.3029e-98		ATP5IF1	2.21204	1.87213	1.43167
ANXA6	9.1075e-87	-0.526957	0.359	0.56	3.33344e-82		PTP4A2	3.75671	2.49428	2.16055
CYBA	4.18168e-89	-0.51786	0.769	0.876	1.53054e-84		KHDRBS1	2.12434	1.8181	1.67808
CLIC1	5.20361e-64	-0.51068	0.401	0.566	1.90457e-59		LCK	3.07503	2.29799	1.84664
ZEB2	3.10185e-43	-0.50484	0.133	0.256	1.13531e-38		HDAC1	0.943774	0.727806	0.523482
AHNAK	6.98944e-46	-0.502316	0.581	0.689	2.5582e-41		RBBP4	1.09535	0.868488	0.802664
KLF2	6.14265e-79	-0.500855	0.894	0.945	2.24827e-74		PSMB2	0.671902	0.517426	0.430805
ITGB1	7.00089e-42	-0.492401	0.392	0.523	2.5624e-37		MEAF6	0.909537	0.727147	0.62248
ADGRE5	1.85753e-51	-0.490031	0.289	0.443	6.79876e-47		NDUFS5	2.55144	2.57084	3.44636
ITGB2	4.69363e-63	-0.48289	0.641	0.76	1.71791e-58		MACF1	1.64371	1.13966	0.723271
KLRG1	2.80726e-54	-0.48052	0.142	0.284	1.02749e-49		CAP1	2.3184	1.49148	1.01503
PFN1	1.66182e-115	-0.479437	0.97	0.989	6.08242e-111		SMAP2	2.64137	3.16523	3.22684
CLEC2B	1.48415e-48	-0.474892	0.365	0.504	5.43213e-44		ATP6V0B	0.991351	0.747594	0.636356
BHLHE40	1.45341e-28	-0.470785	0.316	0.422	5.31962e-24		PLK3	0.574834	0.928096	1.22027
GZMM	6.60853e-62	-0.469233	0.459	0.625	2.41879e-57		PRDX1	1.10536	0.904014	0.761825
ITGA4	6.67807e-50	-0.465769	0.392	0.541	2.44424e-45		EFCAB14	0.701974	0.5238	0.443939
KLRK1	1.78144e-37	-0.464809	0.147	0.263	6.52025e-33		EPS15	0.789367	0.612912	0.454316
S100A4	7.0847e-39	-0.463612	0.775	0.821	2.59307e-34		NRDC	0.685883	0.583641	0.409982
LYAR	3.35322e-48	-0.462943	0.23	0.376	1.22731e-43		SCP2	1.12943	0.833336	0.587251
IFITM2	8.84784e-59	-0.459702	0.704	0.801	3.2384e-54		TMEM59	2.04501	1.57616	1.20128
EFHD2	3.86393e-24	-0.456166	0.359	0.451	1.41424e-19		SSBP3	0.687332	0.458684	0.24142
ARL4C	1.73377e-75	-0.454507	0.846	0.909	6.34578e-71		JUN	6.64285	17.8852	15.493
RIPOR2	1.58215e-69	-0.439732	0.471	0.651	5.79083e-65		PDE4B	1.46513	2.10837	1.75877
PTPRC	1.03584e-110	-0.438241	0.939	0.97	3.79129e-106		GADD45A	0.793855	1.04027	1.19687
PIK3R1	1.07487e-44	-0.436635	0.688	0.76	3.93412e-40		IFI44L	1.24425	0.076159	0.0680192
FLNA	1.67985e-41	-0.425551	0.564	0.671	6.14842e-37		PRKACB	0.911475	0.664301	0.466833
TNFAIP3	1.72693e-59	-0.421243	0.825	0.905	6.32075e-55		GNG5	1.68381	1.22716	1.14189
METRNL	6.26186e-22	-0.420933	0.286	0.384	2.2919e-17		ODF2L	0.659614	0.542805	0.435595
CTSC	4.27414e-36	-0.417645	0.203	0.319	1.56438e-31		GBP5	1.30431	1.09509	0.606743
GNG2	3.82081e-49	-0.412437	0.301	0.452	1.39846e-44		TGFBR3	1.15819	0.866635	0.462789
BTG2	8.84129e-41	-0.409156	0.676	0.76	3.236e-36		S1PR1	2.04182	2.50567	2.83795
TAGAP	8.62693e-50	-0.407841	0.154	0.295	3.15754e-45		PSMA5	0.825938	0.541233	0.571317
ARPC1B	6.53864e-48	-0.405023	0.577	0.689	2.39321e-43		CD53	2.23868	1.47385	1.0019
C12orf75	2.19611e-34	-0.403457	0.217	0.336	8.038e-30		DENND2D	0.751152	0.492825	0.397834
ACTB	3.88252e-82	-0.40125	0.997	0.999	1.42104e-77		RAP1A	1.32572	1.07305	0.940954
PPP1CA	2.93495e-41	-0.399492	0.385	0.512	1.07422e-36		PTPN22	0.694537	0.61554	0.377402
TLN1	3.48434e-46	-0.394238	0.347	0.492	1.2753e-41		ATP1A1	1.17488	1.10137	0.87394
PIM3	3.30139e-24	-0.38484	0.489	0.568	1.20834e-19		CD2	2.9377	2.08642	2.00914
FOSL2	1.19175e-34	-0.383331	0.279	0.399	4.36194e-30		TENT5C	1.36792	1.51149	0.979053
GBP5	8.33311e-41	-0.382874	0.213	0.345	3.05e-36		POLR3GL	1.05481	0.729233	0.569124
EZR	1.23245e-42	-0.37825	0.61	0.721	4.5109e-38		PLEKHO1	0.641678	0.735087	1.27651
SYNE1	1.8719e-33	-0.374697	0.259	0.376	6.85136e-29		ENSA	1.18912	1.01848	0.826425
ETS1	6.11196e-72	-0.37213	0.694	0.827	2.23704e-67		CTSS	1.20253	0.834194	0.694447
CD63	1.08912e-40	-0.371506	0.195	0.32	3.98628e-36		PSMD4	0.915103	0.6686	0.629986
SSBP4	8.3235e-37	-0.368789	0.306	0.425	3.04648e-32		S100A10	7.33802	6.52154	5.36348
LGALS1	8.4401e-17	-0.36398	0.288	0.369	3.08916e-12		S100A11	3.18352	1.52819	2.61535
KLF6	4.86678e-13	-0.360196	0.54	0.568	1.78129e-08		S100A6	12.2454	7.98168	6.13328
NFKB1	3.46098e-28	-0.359559	0.416	0.515	1.26675e-23		S100A4	20.1721	13.4665	9.49064
RPS4Y1	5.58486e-19	-0.359431	0.179	0.269	2.04412e-14		JTB	2.02763	1.56758	1.52565
CFL1	3.58056e-72	-0.358507	0.951	0.964	1.31052e-67		TPM3	5.70434	4.29515	3.39802
APMAP	1.16279e-35	-0.358183	0.163	0.277	4.25591e-31		ADAR	2.01177	1.22871	1.16573
IQGAP1	2.76025e-33	-0.356889	0.296	0.414	1.01028e-28		KRTCAP2	2.68387	2.00686	1.62165
REL	2.58642e-29	-0.356764	0.414	0.52	9.46655e-25		CCT3	0.981313	0.725899	0.71959
IL10RA	3.60345e-30	-0.356742	0.379	0.491	1.3189e-25		NAXE	0.622478	0.489053	0.402161
LCP1	5.92127e-48	-0.354984	0.629	0.752	2.16724e-43		SH2D2A	1.13994	0.906362	0.617431
TGFBR3	7.46011e-23	-0.351719	0.192	0.275	2.73048e-18		PYHIN1	1.01988	0.651052	0.312411
NFE2L2	1.52995e-33	-0.35157	0.331	0.446	5.59976e-29		IFI16	1.22023	0.72049	0.616189
DNAJB1	1.39837e-07	-0.345504	0.8	0.783	0.00511816		FCRL6	0.93716	0.4178	0.127721
PLAC8	1.97195e-32	-0.344369	0.258	0.371	7.21752e-28		TAGLN2	5.30215	5.26437	3.29537
TENT5C	3.89244e-32	-0.34373	0.338	0.451	1.42467e-27		LY9	0.775274	0.511093	0.225539
HLA-DPA1	1.26211e-35	-0.342671	0.245	0.373	4.61945e-31		TSTD1	1.51214	1.27572	1.10805
PSMB9	8.25059e-36	-0.341694	0.418	0.536	3.0198e-31		ARHGAP30	1.22305	0.912461	0.66013
ABHD17A	1.54511e-26	-0.338895	0.508	0.589	5.65527e-22		UFC1	1.49629	1.29993	1.11682
CALR	3.5109e-33	-0.337457	0.59	0.681	1.28503e-28		UHMK1	0.994273	0.811646	0.648951
S100A6	4.05142e-43	-0.332421	0.867	0.913	1.48286e-38		MGST3	1.0121	0.785228	0.496108
CD99	6.64311e-40	-0.332115	0.708	0.799	2.43144e-35		RCSD1	1.1928	0.803202	0.771962
MATK	1.6558e-30	-0.329837	0.154	0.259	6.06039e-26		GAS5	3.77465	4.69017	5.868
BCAP31	7.72374e-42	-0.328021	0.334	0.47	2.82697e-37		CEP350	0.871715	0.663508	0.620271
PPP1R15A	5.72346e-25	-0.326692	0.209	0.305	2.09484e-20		ARPC5	1.98307	1.25657	0.920644
ITGAL	6.52417e-29	-0.32307	0.221	0.328	2.38791e-24		RGS1	0.91768	1.71204	1.33451
TRBC1	1.24228e-17	-0.322147	0.365	0.443	4.54686e-13		BTG2	2.60928	3.87419	2.67058
HNRNPA2B1	2.06597e-61	-0.321076	0.865	0.918	7.56165e-57		ATP2B4	0.682901	0.473421	0.230865
HSP90B1	3.64576e-31	-0.32033	0.577	0.666	1.33438e-26		RAB29	0.707214	0.412277	0.370697
CD8B	1.09652e-14	-0.318729	0.22	0.297	4.01336e-10		CD55	1.70348	2.73201	2.48404
HSPA5	1.40997e-28	-0.317835	0.594	0.682	5.16065e-24		TRAF3IP3	1.79069	1.3423	1.0208
CD81	1.72632e-29	-0.31756	0.609	0.692	6.3185e-25		PPP2R5A	0.670757	0.545679	0.391609
GNAI2	1.26698e-40	-0.317521	0.682	0.771	4.63727e-36		EPRS	0.635131	0.494455	0.388938
LY6E	3.41901e-33	-0.31693	0.603	0.705	1.25139e-28		CAPN2	1.78673	1.15648	0.930957
TMX4	1.13398e-28	-0.314401	0.257	0.365	4.15046e-24		PARP1	0.900643	0.673881	0.515402
MACF1	1.48315e-25	-0.312235	0.28	0.38	5.42848e-21		ITPKB	0.813727	1.04166	1.31609
SPN	6.14132e-22	-0.308694	0.272	0.358	2.24778e-17		GUK1	3.39338	2.84057	2.58277
SHISA5	6.46034e-33	-0.306909	0.312	0.428	2.36455e-28		RNF187	0.839643	0.664265	0.485884
CAP1	3.16531e-28	-0.306201	0.391	0.497	1.15853e-23		LYST	0.740723	0.723501	0.41971
EMP3	1.01549e-35	-0.30579	0.725	0.795	3.7168e-31		HNRNPU	3.62772	3.03831	2.44804
PSME2	1.49691e-30	-0.305724	0.427	0.534	5.47884e-26		SH3YL1	0.493941	0.618586	0.88554
CD53	5.0723e-31	-0.305389	0.396	0.507	1.85651e-26		ID2	2.83501	1.45822	1.04386
PIP4K2A	4.10029e-28	-0.3027	0.3	0.41	1.50075e-23		ITGB1BP1	0.634337	0.436594	0.320256
DIAPH1	3.18062e-28	-0.298025	0.254	0.362	1.16414e-23		YWHAQ	2.19469	1.6835	1.25919
RHOH	2.00584e-25	-0.297489	0.565	0.647	7.34157e-21		PDIA6	1.22134	0.740686	0.448766
BIN2	1.55973e-26	-0.29614	0.483	0.576	5.70877e-22		SNX17	0.854512	0.665676	0.52128
GSTP1	4.94721e-30	-0.293154	0.449	0.555	1.81073e-25		FOSL2	1.09209	1.33539	0.79046
HIST1H1E	1.69185e-09	-0.293064	0.53	0.562	6.19233e-05		YPEL5	1.79544	2.35903	2.36065
NUCB2	3.26517e-26	-0.292566	0.262	0.369	1.19508e-21		BIRC6	0.905649	0.660916	0.546759
MYL12A	7.07601e-44	-0.292413	0.905	0.928	2.58989e-39		EIF2AK2	1.24867	0.411965	0.361136
STK10	1.17904e-28	-0.292245	0.32	0.431	4.31541e-24		EML4	2.35827	2.89738	2.90144
PARP8	2.41707e-32	-0.292217	0.316	0.442	8.84672e-28		RTN4	1.05677	0.814327	0.734617
ITGB7	7.00611e-27	-0.292209	0.286	0.394	2.56431e-22		REL	1.3187	1.8045	1.19007
LINC00861	5.86508e-28	-0.288333	0.263	0.374	2.14668e-23		ACTR2	1.84284	1.59313	1.39712
TMEM109	1.58987e-30	-0.28528	0.163	0.266	5.81908e-26		PLEK	1.33965	0.564978	0.0991537
CYCS	2.27176e-24	-0.283792	0.394	0.486	8.31486e-20		PCBP1	3.84874	3.31074	2.88766
SLC2A3	9.03794e-15	-0.282594	0.738	0.764	3.30798e-10		CCT7	1.13356	0.954406	0.815648
SH3BGRL3	3.13557e-30	-0.282487	0.939	0.956	1.14765e-25		MOB1A	1.18922	0.939854	0.816809
CXCR4	1.90506e-26	-0.282371	0.964	0.978	6.97272e-22		AUP1	1.30758	1.03314	0.839081
APBB1IP	2.0919e-24	-0.282368	0.364	0.458	7.65658e-20		VAMP8	1.67172	1.0452	0.832501
PLAAT4	4.8239e-23	-0.281407	0.649	0.706	1.7656e-18		VAMP5	0.880765	0.637647	0.527572
HLA-A	1.07431e-77	-0.281366	0.999	1	3.93209e-73		RNF181	0.876193	0.632189	0.57634
OAZ1	2.75119e-39	-0.280186	0.811	0.876	1.00696e-34		GNLY	27.3202	10.4909	9.71568
TMSB4X	1.89669e-90	-0.280052	0.999	0.999	6.94209e-86		CD8A	4.25909	3.14127	2.62623
LYST	1.06995e-17	-0.279745	0.186	0.26	3.91613e-13		CD8B	2.5926	2.07202	1.46307
MYL6	4.2597e-37	-0.279572	0.871	0.907	1.55909e-32		CYTOR	0.87853	0.72112	0.484796
SYNE2	4.20414e-17	-0.279138	0.558	0.624	1.53876e-12		MAL	1.16347	1.36609	1.57158
CBLB	4.25491e-22	-0.278933	0.259	0.349	1.55734e-17		DUSP2	8.20983	9.84399	4.31139
SELPLG	1.55021e-20	-0.277958	0.52	0.588	5.67393e-16		ARID5A	1.57489	1.91185	3.01795
BSG	5.75566e-28	-0.277069	0.378	0.48	2.10663e-23		COX5B	3.15231	2.53343	2.6138
ATP2B1	8.1042e-24	-0.276643	0.16	0.25	2.96622e-19		ZAP70	2.23134	1.70542	1.45075
INPP4B	5.65085e-20	-0.275115	0.25	0.341	2.06827e-15		RNF149	1.25699	1.17887	0.888068
PKM	9.44388e-31	-0.275099	0.485	0.581	3.45655e-26		GCC2	1.71234	1.81587	2.13542
PDIA3	1.76487e-23	-0.274723	0.665	0.733	6.45962e-19		ACTR3	1.7332	1.10157	0.785734
M6PR	2.03349e-31	-0.273724	0.166	0.277	7.44277e-27		DBI	1.84853	1.35692	1.05969
TNFRSF1B	1.38343e-16	-0.273662	0.325	0.401	5.06351e-12		PTPN4	1.03901	0.718734	0.455309
NDUFB2	7.758e-24	-0.272962	0.411	0.502	2.8395e-19		GYPC	2.4404	2.71748	3.35254
ACAP2	1.51412e-26	-0.271805	0.276	0.385	5.54184e-22		BIN1	1.73458	1.34108	1.43654
ARID5B	6.22968e-18	-0.271346	0.33	0.414	2.28012e-13		MZT2B	2.93896	3.28926	3.73867
ANXA5	2.44177e-26	-0.271198	0.269	0.378	8.93712e-22		PTPN18	0.691301	0.440919	0.327024
RAP1B	6.73462e-21	-0.271197	0.623	0.691	2.46494e-16		MZT2A	1.11497	0.985702	1.69176
B2M	2.25011e-97	-0.271064	1	1	8.23564e-93		ZEB2	1.72956	1.1236	0.496584
PSMB10	1.30373e-24	-0.271025	0.35	0.454	4.77177e-20		ARL5A	0.72749	0.478225	0.402614
ACTN4	1.39888e-21	-0.269174	0.188	0.276	5.12003e-17		NR4A2	2.49077	4.35485	2.19004
IER2	3.10809e-36	-0.268553	0.739	0.818	1.13759e-31		RBMS1	1.40386	1.06131	0.996137
PBXIP1	1.24012e-18	-0.267854	0.434	0.51	4.53897e-14		WIPF1	2.39528	2.08034	1.69514
STAT1	1.77815e-13	-0.267836	0.223	0.288	6.50822e-09		HNRNPA3	3.1227	2.69446	2.32417
TPM3	2.68448e-30	-0.267817	0.791	0.84	9.82548e-26		NFE2L2	1.00388	1.33245	0.828015
ID2	2.89141e-20	-0.266315	0.28	0.376	1.05829e-15		UBE2E3	0.699199	0.565473	0.393137
BLOC1S1	2.21293e-25	-0.265593	0.308	0.413	8.09955e-21		ITGA4	2.60919	2.26024	1.36069
ACAP1	5.99185e-27	-0.265001	0.461	0.557	2.19308e-22		GLS	1.12263	1.13353	0.825956
PDIA6	1.75245e-23	-0.264832	0.207	0.3	6.41413e-19		STAT1	1.34919	0.864626	0.548691
RAB5IF	1.15984e-17	-0.263661	0.274	0.354	4.24515e-13		HSPE1	1.68406	1.5316	1.28169
JUNB	8.53552e-24	-0.263389	0.975	0.982	3.12409e-19		BZW1	2.15608	1.8216	1.71452
RNF167	3.00143e-23	-0.260651	0.226	0.318	1.09855e-18		CFLAR	1.3223	0.943218	0.948724
ERAP2	8.22092e-28	-0.260396	0.19	0.295	3.00894e-23		XRCC5	1.70763	1.39684	1.2215
HLA-DPB1	7.01349e-23	-0.256923	0.305	0.411	2.56701e-18		ARPC2	6.32183	4.36707	3.73795
CD7	1.46437e-13	-0.256665	0.723	0.744	5.35975e-09		TMBIM1	0.630775	0.730433	0.890078
SH3KBP1	9.4347e-20	-0.255101	0.359	0.446	3.4532e-15		SP110	1.32642	0.778365	0.6912
MGST3	1.01059e-22	-0.254894	0.226	0.317	3.69887e-18		SP100	2.5614	1.36535	1.26877
EVL	7.17583e-30	-0.25461	0.746	0.802	2.62643e-25		ARL4C	7.12657	7.64697	5.31021
WAS	3.99575e-22	-0.254495	0.382	0.473	1.46248e-17		LRRFIP1	2.69056	2.3148	2.10758
CD3E	2.07332e-55	-0.254258	0.965	0.975	7.58855e-51		UBE2F	0.733793	0.646887	0.504582
MFSD10	9.30808e-19	-0.254207	0.224	0.304	3.40685e-14		BHLHE40	1.70378	2.02793	1.18487
CRIP1	4.50215e-16	-0.250926	0.764	0.807	1.64783e-11		TADA3	0.794448	0.42967	0.29591
RPS4X	1.67683e-94	0.250207	0.999	0.997	6.13736e-90		ARPC4	1.59298	1.15483	0.949246
COX4I1	2.12864e-58	0.252785	0.988	0.977	7.79104e-54		BRK1	1.39992	1.0672	0.774157
RPL4	1.64858e-68	0.253545	0.996	0.994	6.03396e-64		LSM3	0.833938	0.639836	0.57345
TMEM123	1.16059e-26	0.255788	0.772	0.689	4.24787e-22		SH3BP5	0.874497	0.417616	0.335735
FTH1	1.42769e-12	0.256743	0.998	0.997	5.22549e-08		OXNAD1	1.00319	1.33938	1.11919
LIMD2	5.59521e-39	0.257774	0.949	0.922	2.0479e-34		PLCL2	0.718812	0.593528	0.432237
SESN3	3.57248e-18	0.258154	0.36	0.27	1.30756e-13		CMC1	1.31024	0.678144	0.61343
GIMAP7	2.06394e-20	0.258812	0.59	0.492	7.55424e-16		TGFBR2	1.31708	1.58607	1.88581
CITED2	0.343814	0.263634	0.328	0.33	1		CMTM6	0.884133	0.737196	0.59843
RPL22	1.09564e-72	0.266203	0.996	0.989	4.01015e-68		MAP4	0.717782	0.565201	0.378621
ZEB1	5.96241e-28	0.270309	0.287	0.181	2.1823e-23		SHISA5	2.2033	1.1388	0.728946
ZFP36L1	1.88805e-24	0.271026	0.703	0.609	6.91045e-20		UQCRC1	0.748391	0.563503	0.37762
GAS5	6.71204e-36	0.271418	0.891	0.818	2.45667e-31		NDUFAF3	0.617269	0.475411	0.372125
UPP1	4.73463e-23	0.274007	0.41	0.298	1.73292e-18		RHOA	4.86802	4.00374	3.20977
RPL12	3.99549e-112	0.275737	0.998	0.995	1.46239e-107		GNAI2	3.87001	3.13717	2.31986
SARAF	4.67771e-59	0.275881	0.994	0.989	1.71209e-54		RASSF1	1.08046	0.672773	0.450098
RPL9	2.58271e-100	0.276246	0.997	0.994	9.45296e-96		TEX264	0.689463	0.475637	0.402862
PPT1	6.23872e-30	0.279539	0.341	0.224	2.28343e-25		TWF2	0.785194	0.57554	0.509926
RPS3A	2.65651e-110	0.281353	0.999	0.998	9.72309e-106		SPCS1	2.21684	1.83015	1.73823
FXYD5	8.68005e-55	0.284338	0.978	0.963	3.17699e-50		TASOR	0.749644	0.541359	0.461988
GRAMD1A	1.41029e-27	0.287414	0.397	0.281	5.16182e-23		ARL6IP5	3.34316	2.50267	2.0786
RPL13	4.04204e-152	0.287784	0.999	1	1.47943e-147		EIF4E3	0.625683	0.460258	0.365486
USP3	1.0632e-30	0.300164	0.54	0.425	3.89142e-26		NFKBIZ	1.15655	1.70923	1.59171
SNHG5	4.50743e-34	0.301977	0.706	0.582	1.64977e-29		CBLB	1.09151	1.00171	0.649808
PIM1	2.60061e-30	0.304341	0.558	0.437	9.51849e-26		BBX	0.939655	0.845796	0.65655
KRAS	2.42163e-29	0.306629	0.497	0.376	8.8634e-25		CD47	1.83315	1.62033	1.31239
RPS18	2.50335e-164	0.306936	0.999	0.998	9.16252e-160		TRAT1	0.852466	0.748363	0.55527
TRIM8	1.57884e-24	0.311517	0.267	0.172	5.77872e-20		HCLS1	3.48442	2.74227	2.40835
NDUFS5	2.09725e-41	0.31636	0.811	0.72	7.67615e-37		RAB7A	1.32737	1.08614	0.932463
PABPC1	4.06589e-71	0.322975	0.993	0.981	1.48816e-66		ZBTB38	0.90323	0.605955	0.463297
LDHA	2.29843e-18	0.323448	0.806	0.757	8.41248e-14		MBNL1	4.22896	3.91098	3.41005
BIRC2	1.15277e-28	0.32726	0.455	0.338	4.21927e-24		RAP2B	0.80226	0.634153	0.506912
TXNIP	0.132347	0.330605	0.94	0.942	1		SKIL	0.332112	0.518855	1.0024
GIMAP5	3.32735e-30	0.334392	0.426	0.307	1.21784e-25		KLHL24	0.544249	0.70468	0.799859
R3HDM4	2.00996e-38	0.33569	0.586	0.452	7.35665e-34		AP2M1	1.17834	0.93687	0.704785
RGS10	5.10212e-32	0.338633	0.638	0.532	1.86743e-27		EIF4A2	2.75269	2.33337	1.96461
IKZF1	4.23155e-38	0.338717	0.738	0.639	1.54879e-33		ACAP2	1.33009	1.02051	0.673557
SPOCK2	1.83565e-49	0.343714	0.883	0.811	6.71867e-45		NCBP2AS2	0.981369	0.670082	0.679629
TGFB1	1.26819e-06	0.359077	0.838	0.844	0.046417		SPON2	1.50431	0.596801	0.273106
TNFRSF25	1.66073e-48	0.380272	0.364	0.213	6.07845e-44		SLBP	0.658738	0.707494	0.984124
PLEKHO1	1.16321e-51	0.391818	0.447	0.281	4.25748e-47		C4orf48	0.80439	0.494629	0.387974
SKIL	3.42153e-61	0.39875	0.373	0.198	1.25231e-56		ADD1	1.18896	0.93594	0.751824
PPP1R14B	7.1819e-16	0.410591	0.327	0.254	2.62865e-11		MFSD10	1.05639	0.810172	0.517735
CERK	8.27413e-56	0.412702	0.435	0.265	3.02842e-51		LRPAP1	0.916894	0.754634	0.647383
FAM102A	1.51348e-58	0.420667	0.44	0.267	5.53947e-54		LYAR	1.69873	1.43873	0.769311
CD6	3.65885e-60	0.420772	0.738	0.607	1.33917e-55		WDR1	1.91688	1.19074	0.945283
TRABD	8.68986e-56	0.42597	0.566	0.399	3.18057e-51		FGFBP2	3.42964	2.58462	0.884271
MZT2A	1.0413e-67	0.438899	0.571	0.382	3.81127e-63		ARAP2	0.935478	0.780956	0.569042
PIK3IP1	5.66602e-84	0.441614	0.889	0.774	2.07382e-79		RHOH	1.93875	2.43955	1.79865
SLC7A5	2.54237e-26	0.448779	0.336	0.236	9.30535e-22		OCIAD2	1.22274	1.22267	2.53864
FLT3LG	1.21974e-69	0.459904	0.729	0.578	4.46437e-65		HOPX	1.61041	1.11811	0.428191
NCF1	3.42934e-57	0.460312	0.342	0.184	1.25517e-52		HNRNPDL	5.58684	4.66561	4.09911
ARID5A	5.14713e-80	0.464527	0.75	0.58	1.8839e-75		SEC31A	0.725182	0.594719	0.420189
CCR7	4.02288e-63	0.480647	0.659	0.48	1.47242e-58		PLAC8	1.50811	1.05486	0.618519
S100A11	3.24542e-41	0.516034	0.534	0.406	1.18786e-36		PPM1K	0.759803	0.47826	0.511299
AQP3	2.2644e-54	0.517622	0.456	0.295	8.28793e-50		GPRIN3	0.84049	0.782859	0.541522
PMEPA1	1.37722e-86	0.561603	0.282	0.105	5.04078e-82		H2AFZ	2.20529	1.9181	1.64522
PDCD4	6.45115e-88	0.576543	0.704	0.538	2.36119e-83		NFKB1	1.10309	1.79107	1.17537
OCIAD2	9.65136e-135	0.6709	0.682	0.452	3.5325e-130		SNHG8	1.86941	2.19886	2.63912
CIB1	4.28321e-132	0.686923	0.752	0.57	1.5677e-127		C4orf3	1.89574	1.6229	1.38797
							ANXA5	1.29611	1.0909	0.732581
							INPP4B	0.933972	1.02568	0.673989
							SMARCA5	0.887568	0.755729	0.629365
							SPCS3	1.42207	1.10751	0.997039
							NDUFS6	0.871016	0.619728	0.524711
							CCT5	0.639599	0.458868	0.373179
							RETREG1	0.25157	0.413739	0.652982
							PARP8	1.81262	1.33674	0.908292
							GZMA	5.47014	2.7421	0.900704
							PIK3R1	4.19008	4.67782	3.19509
							BDP1	0.87044	0.756038	0.540783
							NSA2	2.31261	2.37074	2.80982
							IQGAP2	1.45819	1.12918	0.825816
							TBCA	1.41815	1.23055	1.0482
							CAST	2.42808	1.93749	1.58315
							ERAP2	0.733102	0.729364	0.443775
							LNPEP	1.23045	0.995721	0.834794
							CHD1	1.52567	1.84747	1.93479
							CAMK4	1.29038	1.77518	2.01455
							EPB41L4A-AS1	0.858096	0.93548	1.21676
							REEP5	1.15574	0.859521	0.9425
							C5orf56	0.702337	0.494247	0.34907
							IRF1	2.89699	3.79209	2.01136
							UQCRQ	1.48652	1.26915	1.16122
							TCF7	3.34403	4.10417	3.92738
							SKP1	3.53416	3.19299	2.71681
							TMEM173	0.796293	0.540299	0.68593
							NDUFA2	1.11956	0.99117	0.8346
							DIAPH1	1.2463	0.986014	0.615355
							NR3C1	1.63553	1.82227	2.15159
							YIPF5	0.539144	0.600436	0.806816
							CD74	8.89546	8.00223	6.94876
							ANXA6	2.71115	1.78091	0.929995
							CYFIP2	1.98934	1.53264	1.17464
							LCP2	1.87624	1.29703	1.11585
							STK10	1.3955	1.21221	0.806554
							DUSP1	3.62814	6.69877	3.91992
							ATP6V0E1	2.29897	1.57633	1.17437
							NSD1	0.73785	0.561639	0.478046
							PRELID1	1.53576	1.00928	0.882792
							LMAN2	1.32206	0.970607	0.706423
							GRK6	1.27013	0.849425	0.729157
							TMED9	1.10821	0.869774	0.729108
							PHYKPL	0.707433	0.647786	0.478098
							CANX	1.44103	1.24943	0.915897
							SSR1	0.804269	0.637948	0.546245
							DEK	1.68803	1.36879	1.13101
							RIPOR2	2.49422	2.42873	1.5279
							HIST1H1E	3.49933	2.85336	2.14499
							BTN3A2	0.791349	0.387883	0.299939
							HMGN4	0.867618	0.573911	0.4878
							HLA-F	3.47621	2.82508	2.40917
							PPP1R18	1.4121	0.825709	0.899681
							FLOT1	0.776653	0.563193	0.414784
							PRRC2A	0.75792	0.641545	0.48632
							CSNK2B	1.77144	1.54336	1.25896
							CLIC1	4.01805	2.28487	1.30562
							SNHG32	0.817125	0.974706	1.24552
							ATF6B	0.724724	0.605762	0.433063
							GPSM3	4.05872	3.65992	3.05069
							HLA-DRB1	2.05466	1.38247	0.940164
							TAP2	1.42105	0.893726	0.619544
							PSMB8	2.18613	1.42143	1.2583
							PSMB8-AS1	0.658498	0.53225	0.418885
							PSMB9	3.13125	1.67415	1.11021
							TAP1	1.50911	0.854232	0.694475
							HLA-DPA1	2.41055	1.42926	0.915669
							HLA-DPB1	2.796	1.6793	1.24223
							TAPBP	2.22601	1.88243	1.68502
							CUTA	2.05315	2.07647	1.60005
							PIM1	1.49737	1.42556	1.99521
							CCND3	3.88504	2.70949	2.37739
							TBCC	0.601062	0.431566	0.367105
							CNPY3	0.908256	0.690138	0.509831
							MEA1	0.62887	0.395268	0.352656
							HMGN3	1.10891	0.898339	0.680844
							SNHG5	1.70474	1.96586	2.65641
							AKIRIN2	0.818119	0.559175	0.505927
							BACH2	0.392819	0.661164	0.893376
							PRDM1	1.48266	0.934562	0.70332
							SNX3	1.40347	1.07704	0.952668
							CD164	1.51448	1.10945	1.01763
							GTF3C6	0.703152	0.524148	0.433055
							THEMIS	0.863549	0.581156	0.298622
							SAMD3	0.965653	0.539807	0.235765
							IFNGR1	0.894303	0.811267	0.621105
							TNFAIP3	6.54747	9.25645	6.65932
							ABRACL	1.16839	0.990116	0.816911
							UTRN	1.62719	1.23706	1.03737
							SYNE1	1.85888	1.25287	0.737561
							SNX9	0.599416	0.78876	0.990917
							DYNLT1	1.38424	1.25718	1.02471
							TAGAP	1.22301	0.890707	0.425121
							IGF2R	0.701892	0.656805	0.413007
							MAD1L1	0.725211	0.54402	0.482125
							CHST12	0.893775	0.546595	0.323743
							RAC1	1.90241	1.36658	1.65426
							CYCS	1.62677	1.42165	0.989215
							HNRNPA2B1	7.37144	5.88172	4.50863
							SEPTIN7	3.67529	2.72107	2.76206
							AOAH	0.878545	0.687448	0.247334
							STK17A	2.41843	2.89134	3.32426
							DBNL	0.899922	0.688984	0.622676
							H2AFV	1.84847	1.71445	1.39286
							MYO1G	1.71063	1.14569	0.818749
							SNHG15	0.956161	0.961781	0.687622
							UPP1	1.14253	0.781253	1.15382
							NCF1	0.383555	0.45001	0.994981
							RHBDD2	0.857246	1.08185	1.44133
							SRI	1.00225	0.803378	0.628439
							SAMD9	0.876318	0.381975	0.348754
							ARPC1B	4.44528	2.91471	1.95648
							PDAP1	0.733279	0.560527	0.492551
							ATP5MF	1.65968	1.2615	1.03648
							COPS6	0.785172	0.588915	0.441785
							LAMTOR4	1.8093	1.53164	1.31164
							TSC22D4	1.20314	0.711845	0.469881
							GNB2	1.83443	1.4563	1.34087
							ZNHIT1	0.744025	0.566413	0.49017
							SRPK2	0.917286	0.771766	0.577391
							MDFIC	0.84904	0.681344	0.523466
							ARF5	1.7581	1.53653	1.35423
							ATP6V1F	1.20501	0.900933	0.755356
							MTPN	1.27174	1.01674	0.874811
							ZC3HAV1	1.61315	1.43101	1.2291
							KDM7A	0.343068	0.442874	0.698739
							NDUFB2	1.98977	1.48692	1.05822
							SSBP1	1.35597	1.01903	1.02884
							TRBC1	2.0601	1.86079	1.28828
							TRBC2	3.92024	3.69549	3.23609
							ZYX	1.82459	1.32673	0.965909
							PDIA4	0.611622	0.428014	0.215148
							GIMAP4	1.50137	0.987764	0.955393
							GIMAP5	1.161	0.83621	1.31518
							TMUB1	0.768306	0.629356	0.521423
							NUB1	0.816745	0.671979	0.575575
							DOK2	1.2232	0.731543	0.648076
							PPP3CC	1.3365	1.04909	0.727749
							PDLIM2	0.617913	0.339612	0.1896
							LEPROTL1	4.20931	5.79138	6.70421
							TACC1	0.964494	0.738948	0.692034
							GOLGA7	0.931989	0.867337	0.661243
							PRKDC	0.752397	0.609206	0.510862
							TCEA1	1.88136	1.67284	1.4628
							MYBL1	0.946413	0.655223	0.266473
							SNHG6	4.11077	4.17212	5.01339
							TRAM1	1.75855	1.53707	1.31077
							DECR1	0.6144	0.431849	0.295377
							MTDH	1.95853	1.70433	1.40725
							KLF10	0.852656	0.605537	0.447797
							EIF3E	3.22346	3.86299	4.57144
							EIF3H	3.14925	3.73331	4.07369
							LINC00861	1.16246	1.09535	0.71577
							FAM49B	1.41554	0.945815	0.734463
							LY6E	7.1483	2.9937	2.20605
							GSDMD	0.703644	0.496293	0.326296
							VPS28	1.56692	1.45366	1.12959
							DOCK8	0.982938	0.753366	0.722054
							SMARCA2	1.24297	1.13287	0.911753
							HACD4	0.659954	0.51192	0.390466
							DNAJA1	1.01438	0.983561	0.716388
							BAG1	0.592817	0.482893	0.357017
							AQP3	0.839274	0.901315	1.72191
							CCDC107	0.777486	0.504168	0.328022
							TLN1	2.11677	1.5153	0.913869
							ANXA1	5.297	3.9017	2.19676
							OSTF1	1.27008	0.788443	0.505443
							NINJ1	0.5879	0.90074	1.0733
							HABP4	0.309886	0.374799	0.581523
							SEC61B	2.25216	1.87862	1.71078
							ERP44	0.66288	0.490665	0.409514
							TXN	1.42233	1.09221	0.861143
							AKNA	1.72107	1.53449	1.28338
							STOM	0.920444	0.514069	0.274976
							ARPC5L	1.6553	1.10482	0.926035
							HSPA5	3.73978	3.00555	2.21354
							FAM102A	0.495396	0.664159	1.22756
							SPTAN1	1.29574	1.118	0.936416
							RAPGEF1	0.719736	0.598201	0.489371
							SETX	0.835645	0.584949	0.480833
							RABL6	0.685869	0.50183	0.419035
							FBXW5	0.986713	0.602931	0.462385
							PAXX	2.13007	1.8286	1.65889
							SSNA1	0.942718	0.708329	0.616234
							TUBB4B	0.836131	0.562142	0.467214
							MRPL41	1.12066	0.806026	0.816736
							KLF6	3.66961	3.03528	2.14372
							PFKFB3	0.390302	0.653806	0.783999
							CELF2	2.13905	1.74559	1.70541
							OPTN	1.21464	1.04502	0.837436
							DNAJC1	0.766904	0.553094	0.448053
							PIP4K2A	1.55129	1.15294	0.745461
							APBB1IP	1.45455	1.31374	0.902449
							MAP3K8	1.0826	0.789347	0.325892
							ZEB1	0.333925	0.416224	0.70806
							EPC1	2.20203	1.849	1.75705
							ITGB1	3.00696	2.66683	1.60653
							CREM	1.74547	2.56238	3.08452
							ARID5B	1.38707	1.36872	0.962596
							SRGN	9.87835	9.93233	8.42454
							PRF1	4.88397	2.03389	0.547765
							VSIR	1.80629	1.28801	1.27826
							SPOCK2	3.80039	4.22105	5.62561
							ANAPC16	1.99379	1.65595	1.33591
							ANXA11	2.08829	1.85736	1.57539
							CCSER2	1.05101	1.11857	1.38922
							PGAM1	1.71407	1.3222	1.07367
							HPS1	0.834875	0.715988	0.530719
							NFKB2	0.405247	0.534793	0.631589
							TRIM8	0.460774	0.407734	0.747016
							ATP5MD	2.03141	1.58757	1.5115
							ADD3	1.96828	1.54086	1.36984
							DUSP5	1.13082	1.20979	0.465078
							PDCD4	1.64982	1.73757	3.08246
							ABLIM1	1.02738	1.35593	1.54188
							RGS10	1.49164	1.65183	2.3534
							BUB3	1.32559	1.16282	1.01976
							ADAM8	0.757288	0.519678	0.34347
							PSMD13	0.759841	0.550007	0.499116
							IFITM2	8.57528	4.72765	3.16478
							IFITM3	1.50817	0.714691	0.562102
							SIGIRR	1.52703	1.23122	0.927727
							IRF7	1.042	0.228669	0.281702
							TALDO1	0.801401	0.498336	0.339415
							POLR2L	1.51287	1.25428	0.924539
							CTSD	1.62837	1.12175	0.88739
							LSP1	5.90064	4.94535	4.19465
							CD81	3.72978	2.75428	2.01253
							TRIM22	1.71141	1.01905	0.990647
							EIF3F	3.93881	4.84589	5.36532
							TMEM9B	0.746556	0.588911	0.50222
							PDE3B	1.15282	1.78563	1.86579
							NUCB2	1.01381	1.07964	0.697919
							LDHA	3.58783	3.76963	4.96833
							CD44	2.95702	3.27647	3.77787
							DGKZ	1.52581	1.13138	0.86656
							UBE2L6	1.21319	0.621137	0.503469
							SELENOH	1.44359	1.20813	1.04112
							TMEM109	0.877373	0.636208	0.342643
							CD6	2.16085	2.14246	3.20664
							CD5	1.92745	2.42252	2.88045
							DDB1	0.615949	0.478572	0.404655
							TMEM258	2.09271	1.74894	1.57299
							AHNAK	5.39065	4.52783	2.9025
							HNRNPUL2	0.92816	0.668205	0.597132
							WDR74	0.44712	0.73574	0.700999
							PLAAT4	3.70061	2.95728	2.256
							OTUB1	1.37334	1.0303	0.949259
							FERMT3	0.990451	0.557509	0.38307
							TRMT112	1.77108	1.45506	1.29072
							PRDX5	1.38461	1.02465	0.828671
							CAPN1	0.587525	0.411694	0.254202
							CTSW	6.6832	4.03497	2.26591
							CCDC85B	1.80857	1.17404	1.02363
							DRAP1	2.11264	1.34413	1.14599
							BANF1	0.862933	0.497876	0.363288
							SF3B2	2.35298	1.89413	1.86238
							RAB1B	0.877367	0.677112	0.482675
							POLD4	1.05454	0.839233	0.712922
							PPP1CA	2.85027	1.70874	1.05357
							TBC1D10C	2.12731	1.64967	1.52063
							PTPRCAP	0.718423	0.450886	0.392687
							CDK2AP2	0.788989	0.433137	0.204819
							GSTP1	2.60463	1.80555	1.28965
							NDUFS8	0.920108	0.777614	0.645522
							LAMTOR1	1.20993	0.981119	0.888312
							UCP2	3.15863	2.63643	1.27168
							SPCS2	1.31729	1.02249	0.830797
							CTSC	1.72168	0.975232	0.478748
							SESN3	0.573299	0.962234	1.34673
							BIRC3	0.899826	1.3072	1.26442
							BIRC2	0.677251	0.942229	1.43677
							CASP1	0.705604	0.322777	0.192293
							CARD16	0.907897	0.566215	0.427825
							ATM	1.69534	1.4245	1.1732
							IL10RA	1.95118	1.65293	1.07174
							CD3G	3.92432	2.68728	2.58002
							BCL9L	0.588664	0.593724	0.866894
							SC5D	0.48244	0.849803	1.04188
							ETS1	4.66784	4.33737	3.12387
							FLI1	0.734672	0.556712	0.354047
							VPS26B	0.628384	0.462746	0.358841
							WNK1	1.05661	0.975331	0.745786
							TPI1	2.3629	1.58	1.22589
							C12orf57	3.90197	4.95828	5.42192
							PTPN6	0.921439	0.51561	0.313764
							SLC2A3	2.98911	4.45522	3.4848
							M6PR	1.10934	0.661023	0.373968
							KLRG1	1.76525	0.954221	0.400628
							KLRB1	1.86531	1.77606	1.47855
							CLEC2D	1.83318	1.52714	1.13136
							CLEC2B	2.35877	1.83852	1.04238
							GABARAPL1	0.901576	1.12084	1.28413
							KLRD1	2.60923	0.852726	0.35387
							KLRK1	2.20607	1.10219	0.523177
							ATF7IP	1.06404	0.924103	0.645246
							LDHB	4.89433	5.79937	6.39245
							KRAS	0.980761	1.00922	1.48504
							FGFR1OP2	0.72252	0.562407	0.441631
							RESF1	2.35469	1.94492	1.66598
							NELL2	0.579907	0.975092	1.02888
							FKBP11	1.35961	1.00557	0.710846
							TUBA1B	2.43797	1.83114	1.63901
							TMBIM6	3.24736	2.41905	2.16002
							BIN2	2.62641	1.90715	1.36766
							GRASP	0.451968	0.829886	0.743454
							EIF4B	2.73382	3.42267	3.90168
							ITGB7	1.63242	1.06789	0.688748
							PRR13	3.12939	2.11654	2.04469
							NCKAP1L	0.712525	0.565808	0.487933
							BLOC1S1	1.65009	1.11005	0.755261
							CD63	1.50608	0.904049	0.471783
							PA2G4	1.36148	1.0551	1.16418
							ESYT1	0.756641	0.551503	0.454978
							MYL6	8.59998	6.57457	5.2402
							SMARCC2	0.730637	0.578285	0.487305
							CNPY2	0.862868	0.622782	0.491907
							PTGES3	2.54178	2.06239	2.03744
							OS9	0.896608	0.731389	0.594126
							TMBIM4	1.11279	0.761239	0.67284
							RAP1B	3.56702	2.58275	1.96878
							GLIPR1	1.10799	0.957528	0.758959
							NAP1L1	1.96948	2.26201	2.54376
							PPP1R12A	1.22769	1.02286	0.825791
							NDUFA12	1.33988	1.01139	1.04941
							HSP90B1	3.4927	2.68929	1.9547
							CHST11	0.799647	0.631255	0.45112
							C12orf75	1.5958	1.17573	0.644951
							TCP11L2	0.349499	0.513863	0.67241
							SELPLG	2.49221	2.0707	1.53258
							ARPC3	5.03975	4.0943	3.64101
							TAOK3	0.970119	0.714969	0.613062
							COX6A1	3.69787	2.92332	2.74564
							SRSF9	1.77227	1.27631	1.17446
							DYNLL1	0.732006	0.373345	0.324219
							ANAPC5	1.08745	0.928013	0.736461
							ORAI1	1.27495	1.02967	0.841308
							SETD1B	0.312751	0.429143	0.616148
							PSMD9	0.668223	0.5675	0.407298
							VPS37B	0.905383	0.824612	0.553575
							RILPL2	0.583346	0.753824	0.89171
							GTF3A	2.28837	1.99531	1.81929
							ALOX5AP	1.69454	1.0547	0.734695
							HSPH1	0.416144	0.529609	0.636228
							FOXO1	0.873664	1.10082	1.17408
							ELF1	2.13509	2.08587	1.64912
							RGCC	1.14656	2.13031	1.95998
							EPSTI1	0.694685	0.266473	0.210193
							AL138963.4	1.80713	3.06198	3.16608
							LCP1	5.11147	3.54262	2.55178
							PHF11	1.01095	0.554756	0.62837
							COMMD6	4.38501	4.97324	5.39274
							MYCBP2	1.27445	1.18485	0.926237
							ARGLU1	2.64895	2.13681	1.94624
							RASA3	1.2173	1.31737	1.57623
							UPF3A	0.726781	0.68404	0.421776
							TRAC	1.20302	0.848985	0.645032
							DAD1	1.64565	1.14903	0.840162
							LRP10	1.16547	0.832693	0.629654
							PABPN1	1.84318	1.58051	1.44373
							PSME1	5.48424	4.31325	3.51515
							PSME2	2.77877	1.6355	1.13221
							IRF9	1.12713	0.540966	0.476294
							CHMP4A	0.650407	0.363308	0.256781
							NEDD8	1.53425	1.19593	0.997371
							GZMH	7.6483	3.76334	1.55291
							GZMB	5.47066	2.42845	0.900999
							SNX6	1.21781	0.941949	0.867563
							BAZ1A	1.02039	1.12121	1.3499
							FAM177A1	1.70002	2.52305	3.12993
							PSMA6	1.4967	1.01017	0.906217
							ARF6	2.59623	2.01446	1.61974
							NIN	0.86181	0.676596	0.500336
							GNG2	1.81826	1.39517	0.799621
							PTGER2	0.967532	0.455196	0.153225
							DHRS7	1.62572	1.06931	0.862042
							PRKCH	2.0483	1.87246	1.43867
							SYNE2	3.58437	2.87603	2.19417
							VTI1B	0.666542	0.458572	0.376807
							ZFP36L1	2.23854	2.67674	3.4366
							SRSF5	4.8168	3.84304	3.44193
							FOS	1.9923	4.95899	2.65604
							GPR65	1.05923	0.680266	0.375413
							CCDC88C	1.19076	1.01946	0.737109
							IFI27L2	0.725131	0.545274	0.435725
							GLRX5	0.648199	0.514496	0.427021
							PAPOLA	1.30228	1.14287	0.937719
							BCL11B	1.5682	1.94666	1.99801
							EVL	4.42208	3.77256	3.00042
							PPP2R5C	2.52157	2.50629	1.98424
							HSP90AA1	6.86233	5.81656	4.89252
							EIF5	2.54778	2.36956	2.04012
							AKT1	0.640505	0.507054	0.387087
							GPR132	0.413306	0.641607	0.817065
							CRIP1	8.03384	6.80608	5.55989
							NOP10	0.822523	0.582048	0.605915
							RASGRP1	1.08039	1.04022	0.733597
							PDIA3	3.83611	2.98369	2.29296
							DUT	1.04172	0.868335	0.685129
							TMOD3	0.820393	0.613772	0.477677
							ADAM10	0.82001	0.611526	0.336757
							SLTM	1.01332	0.82179	0.745947
							ANXA2	2.18535	1.20987	0.882798
							VPS13C	1.14529	1.0685	0.844475
							RAB8B	0.66317	0.637613	0.385584
							USP3	1.10433	1.17074	1.6728
							PPIB	5.20944	3.90806	3.37139
							PKM	2.13155	1.84632	1.35218
							CSK	1.54025	0.984697	0.89921
							SCAMP2	0.994015	0.77453	0.680433
							COX5A	1.45019	1.16063	0.963906
							IMP3	1.06537	0.802321	0.712286
							PSTPIP1	0.689789	0.499118	0.347357
							IL16	1.18506	1.2961	1.5877
							AKAP13	1.74196	1.45949	1.31277
							ISG20	3.34918	2.20558	1.84965
							IDH2	0.932491	0.72996	0.552006
							CIB1	2.152	1.81666	3.5344
							IQGAP1	1.75918	1.22356	0.736262
							METTL26	1.06721	0.914066	0.782978
							STUB1	1.23847	0.927845	0.65815
							TSR3	0.702095	0.540359	0.448369
							NDUFB10	1.44649	1.15461	0.971258
							SRRM2	3.9707	3.25704	3.45047
							ELOB	3.11781	2.67126	2.3939
							IL32	19.9329	15.9299	7.58756
							HMOX2	0.762922	0.472811	0.400709
							RSL1D1	1.74923	2.12509	2.20931
							GSPT1	1.84623	2.08267	2.54528
							PRKCB	1.38934	1.12262	0.924129
							IL21R	0.422215	0.585663	0.803667
							ATXN2L	0.838374	0.678618	0.537593
							LAT	2.25371	1.82392	1.58509
							SPN	1.60843	1.03776	0.645231
							MVP	0.907676	0.646508	0.571958
							INO80E	0.665291	0.530675	0.415817
							ITGAL	1.4347	0.947638	0.556877
							BRD7	1.0649	0.758501	0.87043
							RBL2	1.69992	1.62346	1.28744
							MT2A	3.96514	2.24947	1.82659
							HERPUD1	1.9307	1.41805	1.14219
							ADGRG1	1.19666	0.52571	0.227544
							CKLF	0.990062	0.562815	0.293166
							CMTM3	0.91918	0.744499	0.620085
							TRADD	1.01477	0.64127	0.562043
							NUTF2	0.756071	0.580843	0.451325
							PSMB10	2.00507	1.27466	0.885084
							NFATC3	0.797388	0.539172	0.387376
							GLG1	1.25796	1.13992	0.906063
							GABARAPL2	1.05445	0.955212	0.66201
							COTL1	2.29177	2.20532	2.79265
							SLC7A5	0.791294	0.706668	1.3294
							CYBA	9.75764	5.83728	3.7752
							TCF25	1.91115	1.58741	1.46966
							PSMB6	1.24782	1.04142	0.864434
							RNF167	1.23282	0.784903	0.489878
							XAF1	1.99858	0.284349	0.193161
							ACADVL	0.837186	0.659254	0.555861
							GABARAP	3.31826	2.70716	2.4784
							CTDNEP1	1.21068	1.06867	0.853565
							GPS2	1.31636	1.05596	0.934201
							ACAP1	1.75711	1.66485	1.21769
							PLSCR3	1.25686	1.03904	0.933883
							TNFSF12	0.82574	0.59033	0.435158
							EIF4A1	3.80019	3.73628	3.11735
							KDM6B	0.399996	0.644054	0.78635
							NAA38	0.780177	0.517313	0.351515
							TRAPPC1	1.84007	1.35784	1.00241
							PER1	0.828527	1.35099	1.02083
							NCOR1	1.31886	1.07834	0.968643
							UBB	5.38774	4.45168	3.84762
							SNHG29	4.27136	5.73911	6.79173
							FLOT2	0.99072	0.785811	0.662202
							SLFN5	1.72593	0.982925	1.02219
							CCL5	21.4715	14.7766	8.42328
							CCL4	4.79994	2.70653	0.451819
							SYNRG	0.832092	0.651789	0.551942
							MLLT6	0.901486	0.723544	0.573639
							PSMB3	1.39573	1.09236	0.946297
							MIEN1	0.718349	0.55172	0.431835
							IKZF3	1.04651	0.576668	0.395577
							RARA	0.380877	0.437403	0.697323
							CCR7	2.02256	2.63877	4.07743
							TBX21	0.988451	0.556435	0.286364
							MRPL10	0.930001	0.677348	0.572663
							SKAP1	1.80711	1.59483	1.20064
							ATP5MC1	0.641675	0.543273	0.425414
							PHB	0.694696	0.461569	0.343613
							FAM117A	0.78933	0.672347	0.541392
							TOB1	1.13046	0.78382	0.745916
							LIMD2	5.92636	6.45275	7.91075
							PSMC5	1.24449	0.969952	0.700166
							ICAM2	0.86877	0.640335	0.464663
							ERN1	0.912594	0.705793	0.460218
							BPTF	1.56099	1.39131	1.20826
							SLC9A3R1	2.64014	1.24943	0.946941
							JPT1	0.71087	0.396542	0.298976
							UBALD2	2.86279	2.24471	2.12017
							TMC6	1.3353	1.17442	0.960512
							SOCS3	1.34305	1.73443	1.58742
							CYTH1	2.13467	2.08758	1.70052
							USP36	0.770075	1.13773	1.01813
							RNF213	3.04049	1.88052	1.50119
							MCRIP1	0.6233	0.502131	0.39618
							P4HB	1.92753	1.62782	1.30701
							ARHGDIA	2.75178	2.40997	2.11571
							ANAPC11	1.07698	0.837471	0.588025
							CCDC57	0.482102	0.641872	0.725469
							CYBC1	0.660266	0.450149	0.400038
							MYL12A	12.3933	7.10648	5.61923
							RALBP1	0.712406	0.487645	0.310963
							ROCK1	1.10975	0.99659	0.80084
							RNF125	1.73314	2.09907	2.50796
							SMAD7	0.807487	1.14558	1.22952
							MALT1	0.864054	0.739871	0.606316
							SEC11C	0.933201	0.712283	0.576165
							LMAN1	0.725362	0.619682	0.487972
							BCL2	1.05274	1.03497	0.765579
							TXNL4A	1.50179	1.26899	1.01636
							GZMM	4.05934	2.82761	1.76487
							BSG	1.66621	1.33162	0.924205
							R3HDM4	1.10832	1.20721	1.78546
							POLR2E	0.886841	0.718272	0.49724
							ATP5F1D	2.76732	2.40316	2.14789
							FAM174C	0.736556	0.567317	0.454743
							NDUFS7	0.991874	0.731825	0.54848
							ABHD17A	3.26026	2.22323	1.54844
							MKNK2	0.915932	0.750905	0.615005
							PLEKHJ1	0.690694	0.42442	0.305085
							OAZ1	5.96422	4.69093	3.6864
							LSM7	1.75525	1.36911	1.47498
							MATK	0.975305	0.835539	0.460403
							ZBTB7A	1.38706	1.23025	1.05652
							MAP2K2	1.45996	1.19274	0.8868
							MYDGF	1.00006	0.844865	0.714666
							NDUFA11	2.0969	1.73978	1.5638
							DENND1C	0.732576	0.602942	0.4918
							STXBP2	0.793844	0.532105	0.42148
							TRAPPC5	1.07133	0.833614	0.709965
							MYO1F	1.1619	0.67524	0.401652
							UBL5	2.44441	1.93164	1.77823
							PIN1	0.881398	0.645205	0.56009
							SHFL	1.13161	0.63045	0.565739
							DNMT1	0.711981	0.495552	0.459233
							CDC37	1.93856	1.74465	1.47647
							S1PR5	1.00295	0.660782	0.225168
							CDKN2D	1.44049	1.17973	0.953877
							SLC44A2	0.900371	0.735444	0.640935
							WDR83OS	1.82449	1.43025	1.27129
							GET3	0.596502	0.423594	0.339524
							CALR	4.72071	3.02682	2.18697
							RAD23A	1.27946	1.03903	0.965192
							GADD45GIP1	0.990611	0.792816	0.693845
							ADGRE5	2.22667	1.52587	0.798446
							PKN1	1.32048	1.07827	0.864304
							TECR	1.41452	1.53224	1.77423
							NDUFB7	1.61737	1.12235	0.86951
							RASAL3	1.3651	0.936141	0.738045
							RAB8A	0.756994	0.501412	0.425601
							BST2	1.76195	0.731322	0.574414
							ARRDC2	1.12834	1.77594	2.17497
							SSBP4	1.77949	1.26718	0.75578
							COPE	1.80885	1.45656	1.29327
							NDUFA13	3.09142	2.4334	2.10011
							UQCRFS1	1.80712	1.36853	1.36337
							PDCD5	0.84611	0.63846	0.567786
							GRAMD1A	0.527682	0.655375	1.0203
							LSR	0.476816	0.609468	0.886769
							TMEM147	0.586745	0.429836	0.298635
							COX6B1	3.30993	2.88627	2.64672
							HCST	8.16722	5.54746	3.36202
							TBCB	1.25234	0.934685	0.703888
							CAPNS1	1.67953	1.31005	1.06324
							PSMD8	1.24341	1.00986	0.885872
							MAP4K1	0.703179	0.556372	0.418523
							ACTN4	1.21703	0.787341	0.483126
							ECH1	1.07239	0.704139	0.519925
							FBL	1.06626	1.31993	1.48286
							PLD3	0.640003	0.568824	0.388452
							SHKBP1	0.886906	0.641759	0.448568
							HNRNPUL1	1.8414	1.85658	2.28426
							ZNF428	0.950204	0.774096	0.689978
							BCL3	1.25689	1.70674	1.51792
							RELB	0.716705	1.00036	1.03557
							VASP	1.02084	0.4787	0.267332
							CALM3	1.95577	1.66658	1.397
							AP2S1	0.768496	0.529594	0.44998
							TMEM160	0.913321	0.659609	0.49701
							NAPA	1.11913	0.909978	0.773818
							NOP53	5.29953	6.8136	7.23327
							SELENOW	1.94683	1.57226	1.35301
							EMP3	6.44467	4.38129	3.35346
							KDELR1	0.76634	0.633194	0.524912
							PPP1R15A	0.808302	0.966459	0.567981
							BAX	1.57387	1.23952	0.916159
							FLT3LG	1.9654	2.08718	3.24627
							PRMT1	0.702452	0.624619	0.442734
							PTOV1	0.584062	0.534436	0.365322
							ETFB	0.685351	0.500795	0.446592
							NKG7	30.7817	16.1352	7.36115
							ZNF331	1.42228	1.85935	1.62875
							NDUFA3	1.40635	1.14253	0.852687
							PPP6R1	0.896331	0.672053	0.586191
							UBE2S	0.731341	0.669351	0.489107
							CHMP2A	0.705165	0.453381	0.47809
							UBE2M	0.66857	0.494222	0.433283
							RBCK1	1.04633	0.728798	0.565244
							PTPRA	0.865964	0.69664	0.549912
							CDC25B	1.18238	0.871827	0.614165
							TMEM230	0.917785	0.713918	0.545087
							TMX4	1.02206	1.00769	0.614553
							DSTN	1.34195	0.933255	0.895214
							CST7	8.50764	5.27884	2.20911
							APMAP	1.21478	0.79143	0.397578
							HM13	0.822307	0.637722	0.541456
							COMMD7	0.728454	0.581344	0.456629
							RALY	1.82572	1.43124	1.14937
							CPNE1	0.692073	0.522761	0.401038
							ROMO1	1.04824	0.849318	0.769163
							SCAND1	1.92389	1.47818	1.4185
							RAB5IF	1.36387	1.0607	0.716505
							SAMHD1	2.20886	1.47997	1.18856
							YWHAB	5.10262	4.06154	3.51284
							PREX1	1.28674	1.0341	0.898133
							ZFAS1	2.95557	3.41173	4.21698
							UBE2V1	1.63325	1.3525	1.27285
							CEBPB	1.28581	1.08598	0.788832
							RTF2	0.71026	0.524419	0.462711
							RBM38	3.02578	3.74055	4.12346
							PMEPA1	0.141524	0.255436	0.852908
							PSMA7	2.68815	1.8637	2.1894
							RGS19	0.732603	0.354413	0.301566
							HMGN1	2.62073	2.20274	1.89075
							MX1	1.2845	0.391489	0.521118
							CSTB	1.49856	1.07489	1.01301
							ITGB2	5.69788	4.13595	2.67499
							PRMT2	2.40796	2.59682	3.05821
							UBE2L3	1.22255	0.872143	0.845329
							SDF2L1	0.754349	0.449241	0.310065
							MAPK1	0.873734	0.606925	0.441922
							TPST2	1.04999	0.549459	0.217943
							XBP1	1.7613	1.38473	1.05989
							EWSR1	1.7995	1.50899	1.34049
							UQCR10	2.21133	1.59985	1.69182
							PIK3IP1	2.51394	3.96826	5.74751
							YWHAH	0.679507	0.42292	0.255372
							TOM1	0.409268	0.431999	0.639452
							MYH9	4.52738	3.75956	3.35709
							IL2RB	0.913752	0.677266	0.612738
							RAC2	6.41059	4.36394	2.69001
							SH3BP1	0.866749	0.481613	0.251436
							LGALS1	4.7104	2.56398	1.76928
							EIF3L	2.09849	3.05939	3.48153
							POLR2F	0.594806	0.432955	0.366649
							DDX17	1.79735	1.62417	1.29752
							APOBEC3G	1.06131	0.603105	0.552404
							RBX1	1.28566	0.903266	1.08267
							SMDT1	1.72963	2.41426	1.9268
							NDUFA6	1.39762	1.10943	1.08372
							TSPO	1.96051	1.71137	1.48686
							CERK	0.60882	0.665393	1.21693
							PIM3	1.391	2.37058	1.5814
							TRABD	1.07706	1.05557	1.76161
							CD99	5.72649	4.79158	3.60066
							CA5B	0.672826	0.512815	0.325106
							SYAP1	0.770209	0.970757	1.04221
							SH3KBP1	1.63834	1.28573	0.91528
							EIF2S3	1.72553	1.85674	2.15746
							ATP6AP2	1.16505	1.03891	0.853239
							NDUFB11	2.44443	2.23273	1.98303
							UXT	2.29588	2.64099	3.05807
							RBM3	4.31256	4.79697	5.36321
							WAS	1.79458	1.32674	0.950465
							MSN	3.22551	2.53014	2.00594
							IL2RG	6.14535	4.3688	2.54878
							ATRX	1.67449	1.41496	1.07143
							COX7B	1.6882	1.3262	1.3226
							SH3BGRL	1.74821	1.47511	1.31025
							NDUFA1	2.27708	1.99003	1.67374
							BCAP31	1.70086	1.22644	0.773645
							FLNA	4.96674	3.49472	2.34656
							ATP6AP1	0.707276	0.532785	0.415976
							FAM50A	0.620898	0.460814	0.386482
							FUNDC2	0.814588	0.665619	0.570667
