# Supplementary material for: Nasal anti-CD3 mAb (Foralumab) dampens CD3+ T effector function and decreases NKG7 in COVID-19 through a mechanism involving GIMAP-7 and TGFb1
Source: Research Square preprint supplement (doi:10.21203/rs.3.rs-2061549/v1), 2022-10-13
Supplement: Supplementary file 5 [file 69179e492f75bceff24f0f0a.xlsx]

## Sheet: Sheet1
Expanded data 4: Serum Biomarkers before and after treatment measured by Olink
	Change from baseline
feature	untreated	Foralumab	difference of change	p-value for change
ST1A1	0.131197	2.46533	2.33413	0.00201166
AXIN1	0.127841	1.35137	1.22353	0.00348455
Flt3L	0.745447	0.141958	-0.603488	0.00995698
NT.3	0.062812	0.297167	0.234355	0.0194514
SIRT2	-0.0528867	0.969592	1.02248	0.0198601
IL.12B	0.152227	-0.483608	-0.635834	0.02601
uPA	0.184318	-0.0466967	-0.231015	0.0604556
IL.10RB	0.292719	0.114744	-0.177975	0.0652216
CCL19	-0.164771	-0.636488	-0.471718	0.0727402
IL7	0.186048	-0.178203	-0.364251	0.0734957
CCL3	0.399287	1.17563	0.776339	0.0866608
CASP.8	0.120217	0.703429	0.583213	0.0885505
TNFSF14	0.345608	1.17614	0.830534	0.0889582
CXCL5	0.570041	0.245389	-0.324651	0.0958058
TRAIL	-0.217176	-0.45246	-0.235284	0.100879
STAMBP	0.052478	0.590166	0.537688	0.100895
IL.17A	0.114581	-0.127807	-0.242388	0.105893
EN.RAGE	0.867113	1.69961	0.8325	0.111507
IL4	0.293881	0.034025	-0.259856	0.133015
OPG	-0.032244	-0.241268	-0.209024	0.140736
TGF.alpha	0.774471	1.31279	0.538319	0.162269
IL8	0.498317	1.43489	0.936569	0.173829
MCP.1	0.216814	-0.145663	-0.362477	0.178597
FGF.21	-0.421841	0.166473	0.588315	0.18497
CCL4	0.350899	0.705976	0.355077	0.201514
CST5	0.206891	0.0499842	-0.156907	0.207156
CD8A	-0.153015	-0.347793	-0.194778	0.208693
IL.10RA	0.025188	0.141113	0.115925	0.242564
CSF.1	-0.132142	-0.277646	-0.145504	0.265485
CCL25	-0.0102333	-0.179648	-0.169415	0.280005
SLAMF1	0.064454	-0.0593567	-0.123811	0.294032
TSLP	-0.0122573	0.132818	0.145075	0.295701
OSM	0.911146	1.44677	0.535619	0.298624
CCL28	0.150425	0.0537242	-0.0967012	0.313826
FGF.19	0.592041	0.154919	-0.437121	0.328816
DNER	-0.00655333	-0.0894817	-0.0829283	0.334822
CXCL6	0.285085	0.517676	0.232591	0.348748
X4E.BP1	-0.220476	0.198314	0.41879	0.351981
IL.2RB	-0.01368	0.08022	0.0939	0.352453
IL.20RA	-0.0143087	0.0774483	0.091757	0.368567
LAP.TGF.beta.1	0.33888	0.144853	-0.194027	0.37534
CD40	0.153983	0.311898	0.157915	0.378852
TNF	-0.283642	-0.143477	0.140165	0.410011
CX3CL1	-0.241855	-0.363919	-0.122065	0.415914
CCL23	-0.151737	0.004365	0.156102	0.423583
IL6	-0.434878	-0.785147	-0.35027	0.426532
IL.17C	0.099124	-0.0802367	-0.179361	0.470507
IL18	-0.414487	-0.536239	-0.121752	0.499164
TNFB	-0.0167707	-0.124263	-0.107493	0.502614
TNFRSF9	0.315929	0.217447	-0.0984827	0.502834
MCP.2	-1.2077	-1.42521	-0.217511	0.542491
PD.L1	-0.32002	-0.417697	-0.0976767	0.542779
VEGFA	0.126869	0.248674	0.121805	0.550373
LIF	0.036872	-0.0173	-0.054172	0.569042
MMP.1	0.243083	0.394703	0.15162	0.56937
MCP.3	-0.208148	0.0260683	0.234216	0.573176
IL5	-0.110411	-0.0363583	0.0740523	0.575063
CDCP1	-0.010262	-0.096865	-0.086603	0.579551
IL2	0.0848393	0.0424008	-0.0424385	0.593549
IL33	0.00666267	-0.0335042	-0.0401668	0.606432
MMP.10	0.0845573	-0.0612858	-0.145843	0.637278
IL.18R1	-0.351215	-0.421414	-0.0701988	0.642243
IL.1.alpha	0.176763	0.127505	-0.0492583	0.653271
SCF	-0.139116	-0.209994	-0.0708782	0.673621
IL10	-0.71437	-0.880145	-0.165775	0.676426
CXCL9	-0.287405	-0.409457	-0.122052	0.687249
CXCL1	0.02952	0.122994	0.0934742	0.691616
CD244	0.0329047	0.0786275	0.0457228	0.70694
TRANCE	0.27661	0.354832	0.0782225	0.730946
NRTN	0.0344793	0.00632083	-0.0281585	0.737384
IL.24	0.00789267	-0.0733325	-0.0812252	0.738933
IFN.gamma	-1.88101	-2.14324	-0.26223	0.752982
HGF	0.528521	0.599805	0.0712837	0.76484
FGF.23	0.103004	0.133471	0.0304668	0.775944
ADA	0.002288	0.0318125	0.0295245	0.798627
CCL20	-0.150472	-0.235722	-0.0852497	0.803061
CD6	0.274166	0.233526	-0.0406402	0.81259
IL13	0.155222	0.189685	0.034463	0.813722
ARTN	0.0353793	0.010815	-0.0245643	0.851581
CXCL10	-1.79701	-1.8703	-0.0732913	0.867024
FGF.5	0.03404	0.0440483	0.0100083	0.876827
IL.15RA	0.0223467	0.0373833	0.0150367	0.877661
LIF.R	-0.178097	-0.160927	0.01717	0.884155
MCP.4	0.578746	0.545084	-0.0336618	0.913387
TWEAK	0.344359	0.359457	0.0150988	0.926845
CD5	0.179203	0.189172	0.00996833	0.936985
IL.20	0.06451	0.0589008	-0.00560917	0.94894
CCL11	0.226163	0.217732	-0.00843083	0.964323
GDNF	-0.043784	-0.0415558	0.00222817	0.98592
IL.22.RA1	-0.121002	-0.118319	0.00268283	0.989745
CXCL11	-1.0519	-1.04779	0.004118	0.992155
Beta.NGF	0.0447707	0.0446767	-9.4e-05	0.998355
