# Supplementary material for: Nasal anti-CD3 mAb (Foralumab) dampens CD3+ T effector function and decreases NKG7 in COVID-19 through a mechanism involving GIMAP-7 and TGFb1
Source: Research Square preprint supplement (doi:10.21203/rs.3.rs-2061549/v1), 2022-10-13
Supplement: Supplementary file 6 [file 74acc3eb7718f9ce13b88a41.xlsx]

## Sheet: Sheet1
Supplementary Table 3: Gene set enrichment analysis (Enricher) of DEGs found in comparison of COVID-19 subjects vs. healthy controls
Pathways given by Enricher analysis	p value	Source	Molecules
T cells
IL-18 signaling pathway WP4754	3.309e-05	WikiPathway2021 Human	MITCH1, BTG2, CD83, PRKCD, TNFAIP3, PIK3R1, ACACB, NFKB1, NFKBIA, SOCS3, RASA3, ZC3H12A, NFKBIZ, CYCS
VEGFA-VEGFR2 Signaling Pathway WP3888	4.346e-05	WikiPathway2021 Human	DUSP5, PRKCD, FRS2,PIK3R1, ACACB, FOXO1, NFKB1, HERPUD1, NFKBIA, NR4A2, SDCBP, LDHA, NR4A3, CYCS, FYN, EZR, PTMA, ATF4
Activation of NLRP3 Inflammasome by SARS-CoV-2 WP4876	0.003943	WikiPathway2021 Human	TRAF3, NFKB1
Host-pathogen interaction of human coronaviruses - interferon induction WP4880	9.084e-05	WikiPathway2021 Human	TRAF3, NFKBIA, EIF2AK2, RIPK1, NFKB1
TNF signaling pathway	4.098e-06	KEGG 2021 Human	DUSP5, PRKCD, FRS2,PIK3R1, ACACB, FOXO1, NFKB1, HERPUD1, NFKBIA, NR4A2, SDCBP, LDHA, NR4A3, CYCS, FYN, EZR, PTMA, ATF4
Monocytes
IL-18 signaling pathway WP4754	3.144e-17	WikiPathway2021 Human	MITCH1, CD83, CXCL8, CD81, CXCL3, TNF, CXCL2, ICAM1, CXCL16, ABHD16A, ZC3H12A, NFKBIZ, TIMP1, LRRFIP1, IER3, TGM2, MEF2A, IL10, FBXW7, TNFRSF1A, RASA3, BIN1, IL1B, TRAF6, STF3, STK40, ARF6, CEBPB, SDC4, PIK3R1, PTGS2, HCAR2, SOCS3, MAPK9, IRAK1, CCL5, CCL4, CCL3, HMOX1, CCL2, ZBTB7A, ABCF1, NCAPH2, FOXN3, NFKB1, VEGFA, NFKBIA, NR4A1, CCDC9, REL, CTNNB1, CYCS, PTPN7, NFKBIE, MYD88
VEGFA-VEGFR2 Signaling Pathway WP3888	1.544e-13	WikiPathway2021 Human	ITGB1, FLT1, CXCL8, ARPC5L, SLC8A1, ICAM1, TUBA1C, PNP, CCRL2, ELOC, EPHB2, MAP2K3, ACOT9, DUSP5, MAP2K1, TPM3, PRKCE, PLAUR, RHOC, F3, ERN1, BIN1, MAPKAPK2, RAPGEF1, ADAM9, EZR, ATF4, ARF6, HBEGF, SRC, IQGAP1, PIK3R1, PTGS2, FOXO3, NDRG1, RAP1B, PPP2CA, MAPK9, HLX, MKNK1, MYO6, CCL2, FLNB, EIF4E, SLC25A25, PTPN1, EGR1, RBM39, EGR3, EIF2AK3, NFATC1, SOD2, NFBK1, TPCN2, VEGFA, NFKBIA, NR4A2M MOV10…
SARS-CoV-2 innate immunity evasion	2.645e-11	WikiPathway2021 Human	Il-10, IFITM1, CXCL8, TGFB1, SMAD3, MX1, CXCL3, TNF, CXCL2, NFKB1, TBK1, AP1G1, TRAF6, CCL5, CCL4, IRF7, CCL3, EP300, CCL2, NUP98, HAVCR2
IL-1 signaling pathways WP195	4.12e-10	WikiPathway2021 Human	MAP2K3, MAP2K1, IL1R1, IL1RAP, PIK3R1, NFBK1,NFKBIA, MAPK9, IRAK1, IRAK2, IL1B, TRAF6, MAPKAPK2, REL, CCL2, TAB3, TAB2, MYD88
Structural pathway of interleukin 1 WP2637	4.226e-12	WikiPathway2021 Human	MAP2K3, MAP2K1, IL1R1, IL1RAP, NFBK1,NFKBIA, MAPK9, IRAK1, IRAK2, TRAF6, MKNK1, MAPKAPK2, IRF7, TAB3, MAP3K8, MBP, TAB2, EIF4E, MYD88
Toll-like receptof signaling pathways WP75	7.245e-09	WikiPathway2021 Human	MAP2K3, MAP2K1, CXCL8, PIK3R1, TICAM1, TNF, NFBK1, PIK3R5, MAPK13, NFKBIA, MAPK9, TBK1, IRAK1, TRAF6, IL1B, CCL5, CCL4, IRF7, CCL3, TAB3, MAP3K8, TAB2, MYD88
B cells
Unfolded proteins reSposnse WP4925	9.463e-11	WikiPathway2021 Human	PPP1R15A, ERN1, XBP1, BCL2L11, HSPA5, DDIT3, DNAJB11, EIF2AK3, CALR, HSP90B1, NFE2L2, ATF4
Apoptosis WP254	1.618e-10	WikiPathway2021 Human	JUN, DIABLO, IGF1, NFKB1, CASP9, NFKBIA, BCL2L11, TRAF3, IRF4, MYC, IRF1, PMAIP1, FAS, CYCS, NFKBIE, NFKBIB
MAPK signaling pathways wp382	1.788e-09	WikiPathway2021 Human	CACNA1F, RELB, ELK4, CDC42, DUSP10, MYC, AKT2, MKNK2, MAP3K8, DUSP4, JUN, DUSP2, JUND, DUSP1, FOS, NFKB1, TGFBR1, NR4A1, PPM1A, DDIT3, TAOK1, MAPKAPK2, RAPGEF2, FAS, ATF4
Enricher:
Chen EY, Tan CM, Kou Y, Duan Q, Wang Z, Meirelles GV, Clark NR, Ma'ayan A. Enrichr: interactive and collaborative HTML5 gene list enrichment analysis tool. BMC Bioinformatics. 2013; 128(14). Kuleshov MV, Jones MR, Rouillard AD, Fernandez NF, Duan Q, Wang Z, Koplev S, Jenkins SL, Jagodnik KM, Lachmann A, McDermott MG, Monteiro CD, Gundersen GW, Ma'ayan A. Enrichr: a comprehensive gene set enrichme…
Enrichr references:
Chen EY, Tan CM, Kou Y, Duan Q, Wang Z, Meirelles GV, Clark NR, Ma'ayan A.
Enrichr: interactive and collaborative HTML5 gene list enrichment analysis tool. BMC Bioinformatics. 2013; 128(14).
Kuleshov MV, Jones MR, Rouillard AD, Fernandez NF, Duan Q, Wang Z, Koplev S, Jenkins SL, Jagodnik KM, Lachmann A, McDermott MG, Monteiro CD, Gundersen GW, Ma'ayan A.
Enrichr: a comprehensive gene set enrichment analysis web server 2016 update. Nucleic Acids Research. 2016; gkw377 .
Xie Z, Bailey A, Kuleshov MV, Clarke DJB., Evangelista JE, Jenkins SL, Lachmann A, Wojciechowicz ML, Kropiwnicki E, Jagodnik KM, Jeon M, & Ma’ayan A.
Gene set knowledge discovery with Enrichr. Current Protocols, 1, e90. 2021. doi: 10.1002/cpz1.90
