# Supplementary material for: Nasal anti-CD3 mAb (Foralumab) dampens CD3+ T effector function and decreases NKG7 in COVID-19 through a mechanism involving GIMAP-7 and TGFb1
Source: Research Square preprint supplement (doi:10.21203/rs.3.rs-2061549/v1), 2022-10-13
Supplement: Supplementary file 7 [file 74f7e00602021c216f24e211.xlsx]

## Sheet: Sheet1
Suplementary table 6: Serum markers altered by COVID-19 detected by proteomics (Olink)
	HV	COVID-infected	infected vs HV	p
MCP.2	8.30553	10.7558	-2.45024	6.4558e-06
CXCL11	6.86224	8.91145	-2.04921	0.0001275
CXCL10	8.88019	11.2368	-2.35659	0.000181172
CXCL1	9.52436	10.5975	-1.07318	0.000183209
IL18	7.92115	9.017	-1.09585	0.00198173
CXCL6	8.17169	9.10392	-0.932234	0.00251506
CSF.1	10.0364	10.4687	-0.43224	0.00304732
MCP.3	2.13455	3.53824	-1.40369	0.00389194
PD.L1	5.07318	5.9438	-0.870618	0.00422702
IL8	5.90869	6.79143	-0.882739	0.00549094
CCL28	2.85374	2.39867	0.455066	0.00641229
TNFSF14	4.59892	5.60636	-1.00744	0.0088497
IL.18R1	8.50912	9.08559	-0.576464	0.0190139
IL10	3.27677	4.39898	-1.12221	0.0210764
CCL19	8.92842	9.90026	-0.971836	0.0213402
IL6	1.94574	3.20333	-1.25758	0.0248174
SLAMF1	2.164	2.55481	-0.390817	0.0312496
CST5	6.61652	6.21026	0.406261	0.0348442
IFN.gamma	7.06174	8.87605	-1.81431	0.0410612
MCP.4	13.7251	14.4516	-0.726494	0.0422308
IL.15RA	1.29327	1.5384	-0.245135	0.0584525
MCP.1	11.4252	12.0194	-0.59422	0.058535
CCL20	6.50025	7.36306	-0.86281	0.0715074
TNF	2.63618	3.14652	-0.510337	0.081816
IL2	0.854817	0.978092	-0.123275	0.0863363
VEGFA	10.9161	11.332	-0.415903	0.0907646
X4E.BP1	7.6287	6.94771	0.680992	0.0951996
CD40	10.7718	11.0991	-0.327336	0.105169
ADA	5.24104	5.51266	-0.271623	0.118701
CCL3	5.37805	5.83474	-0.456688	0.119819
CXCL5	11.9293	12.5391	-0.60978	0.124468
ST1A1	1.59743	2.29158	-0.694153	0.133596
CX3CL1	4.45792	4.87452	-0.416596	0.145048
TNFB	4.91534	5.23137	-0.31603	0.154108
CCL23	9.69045	10.0897	-0.399229	0.168887
IL33	0.63738	0.94726	-0.309881	0.175556
IL.12B	5.95128	6.45694	-0.505665	0.178229
TRAIL	8.08059	8.33345	-0.252856	0.196595
IL.20	0.67559	0.760873	-0.0852835	0.210916
FGF.19	8.95464	8.32769	0.626956	0.211108
OPG	9.83041	10.0752	-0.244796	0.236975
CDCP1	2.61892	3.02815	-0.409234	0.239247
IL.22.RA1	1.96747	2.24931	-0.28184	0.255682
IL.1.alpha	-1.55953	-1.44971	-0.109819	0.271559
CD244	5.81511	6.00305	-0.187941	0.274082
IL5	1.77148	1.34813	0.42335	0.276685
LIF	0.265535	0.557865	-0.29233	0.28179
CCL25	5.87308	6.17615	-0.303067	0.293949
IL.17C	2.95577	3.18428	-0.228517	0.307346
SIRT2	2.75195	3.01114	-0.25919	0.326118
DNER	8.83468	8.95751	-0.122835	0.337326
LAP.TGF.beta.1	6.83827	7.01265	-0.174387	0.34422
IL.20RA	1.19163	1.29594	-0.104314	0.402231
MMP.10	9.16807	9.44714	-0.279062	0.42598
IL.2RB	0.978758	1.04859	-0.0698317	0.44649
CD5	5.23801	5.37333	-0.13532	0.465022
STAMBP	3.76556	3.95164	-0.186079	0.465886
IL.10RB	6.10388	5.96711	0.13677	0.471861
NRTN	0.930707	1.13565	-0.204945	0.480423
FGF.21	4.46241	4.88612	-0.423715	0.517214
LIF.R	4.35587	4.48171	-0.125843	0.518287
FGF.5	1.1843	1.25362	-0.0693212	0.559481
IL4	0.263335	0.412977	-0.149642	0.623795
IL.10RA	1.26049	1.35595	-0.0954607	0.632065
CASP.8	2.70321	2.81637	-0.11317	0.661454
GDNF	2.26081	2.34022	-0.0794056	0.689335
Beta.NGF	0.238432	0.260675	-0.0222429	0.693002
CXCL9	6.62332	6.74147	-0.118152	0.712743
IL7	3.53276	3.61458	-0.0818225	0.73875
SCF	9.21435	9.16561	0.048734	0.748741
FGF.23	1.61824	1.66067	-0.0424259	0.750777
NT.3	1.88573	1.94918	-0.0634527	0.754991
CD8A	9.70487	9.78696	-0.0820916	0.77105
AXIN1	1.45327	1.51826	-0.0649946	0.795299
TNFRSF9	6.31193	6.37305	-0.0611197	0.798176
IL13	1.31149	1.2163	0.0951907	0.804323
TSLP	1.75315	1.8301	-0.0769497	0.810687
IL.17A	2.03982	2.08718	-0.04736	0.822585
ARTN	1.23972	1.27294	-0.0332213	0.847505
TWEAK	8.71282	8.66998	0.0428414	0.849965
CCL4	6.03285	5.98883	0.0440193	0.853096
uPA	9.4345	9.39065	0.0438491	0.858407
TRANCE	4.42126	4.46935	-0.0480909	0.883246
IL.24	1.27468	1.31202	-0.0373424	0.884358
TGF.alpha	3.70718	3.7444	-0.0372155	0.905164
EN.RAGE	4.87499	4.91775	-0.0427604	0.91123
OSM	5.82895	5.87519	-0.0462394	0.913827
CD6	6.37339	6.39614	-0.0227497	0.924372
CCL11	7.83749	7.82746	0.0100281	0.965807
MMP.1	14.835	14.8202	0.0148039	0.967003
Flt3L	8.92413	8.93284	-0.00870649	0.970844
HGF	8.63427	8.62606	0.00821099	0.973782
