# Supplementary material for: Nasal anti-CD3 mAb (Foralumab) dampens CD3+ T effector function and decreases NKG7 in COVID-19 through a mechanism involving GIMAP-7 and TGFb1
Source: Research Square preprint supplement (doi:10.21203/rs.3.rs-2061549/v1), 2022-10-13
Supplement: Supplementary file 8 [file b0601bf3d494e9b58bb87961.docx]

| **Supplementary Table1. Subject demographics** | | | | | | |  |  |  |
| --- | --- | --- | --- | --- | --- | --- | --- | --- | --- |
|  |  | Foralumab | | Untreated | | Healthy controls | | |  |
|  | Total | Gender (F/M) | Age  (yrs) | Gender  (F/M) | Age  (yrs) | Gender  (F/M) | | Age  (yrs) |  |
| Proteomics | n=33 | 12 (10/2) | 44.5 ± 11 | 15 (9/6) | 31 ± 18.9 | 6 (5/1) | | 42.4 ± 7 |  |
| Bulk-RNA | n=23 | 8 (7/1) | 47.6 ± 9.1 | 8 (6/2) | 39.8 ± 19.1 | 7 (2/5) | | 31.9 ± 5.1 |  |
| scRNAseq | n=12 | 4 (3/1) | 46.7± 8.3 | 4 (3/1) | 48.7 ± 24.5 | 4 (2/2) | | 35.6 ± 2.5 |  |
| Proteomics: Multiplex and Olink  Bulk-RNA: Smart2-seq  scRNAseq: 10X genomics  Age ± Standard Deviation | | | | | | | | | |
