# Supplementary material for: Nasal anti-CD3 mAb (Foralumab) dampens CD3+ T effector function and decreases NKG7 in COVID-19 through a mechanism involving GIMAP-7 and TGFb1
Source: Research Square preprint supplement (doi:10.21203/rs.3.rs-2061549/v1), 2022-10-13
Supplement: Supplementary file 9 [file b0e2b9e3d50dd07fab05472c.docx]

**Supplementary Table 5: Serum Biomarkers before and after treatment measured by Multiplex**

|  | **Control** | |  |  |  | | | | |  | **Foralumab** | | | | | | | |  | |
| --- | --- | --- | --- | --- | --- | --- | --- | --- | --- | --- | --- | --- | --- | --- | --- | --- | --- | --- | --- | --- |
|  | **Day -2** | **Day 10** |  |  |  | | | | | **Day -2** | | | **Day 10** |  | |  | | |  | |
|  | Mean (±SD) # | | Change | | | | p-value* | | | Mean (±SD) | | | | | change | | | p-value | |
| IL.18 | 34.8 (±18.9) | 32.2 (±17.7) | -2.6; 95% CI: -9.6, 4.3 | | | - Ψ | | 0.429 | 46.9 (±15.5) | | | 37.6 (±12.6) | | | -9.3; 95% CI: -18.9, 0.2 | | - Ψ | 0.054 | |
| BDNF | 144.4 (±217.6) | 174.3 (±191) | 29.9; 95% CI: -109.2, 169 | | | - | | 0.651 | 91.5 (±105.6) | | | 279.6 (±274.6) | | | 188.1; 95% CI: 50.8, 325.4 | | ↑ | 0.012 | |
| VEGF-A | 455.6 (±391.8) | 525.1 (±359.6) | 69.5; 95% CI: -98.1, 237.2 | | | - | | 0.389 | 362.1 (±184.7) | | | 610.4 (±310.2) | | | 248.3; 95% CI: 103.8, 392.9 | | ↑ | 0.003 | |
| PIGF-1 | 49.2 (±29) | 67.4 (±38.6) | 18.1; 95% CI: -0.8, 37.1 | | | - | | 0.059 | 55.8 (±28.7) | | | 87.1 (±41) | | | 31.3; 95% CI: 12.2, 50.5 | | ↑ | 0.004 | |
| SCF | 6.3 (±4.6) | 6.8 (±3.7) | 0.5; 95% CI: -0.6, 1.6 | | | - | | 0.316 | 5.5 (±3.2) | | | 6.6 (±4.1) | | | 1.1; 95% CI: 0.2, 2 | | ↑ | 0.023 | |
| HGF | 73 (±43.9) | 125.5 (±72.4) | 52.5; 95% CI: 23.9, 81.1 | | | ↑ | | 0.001 | 89.6 (±41.1) | | | 187.2 (±89.5) | | | 97.6; 95% CI: 63.7, 131.6 | | ↑ | <0.001 | |
| PDGF-BB | 34.6 (±31) | 77.5 (±78.4) | 42.9; 95% CI: 0.3, 85.5 | | | ↑ | | 0.048 | 48 (±49.5) | | | 159.2 (±219.4) | | | 111.1; 95% CI: -1, 223.3 | | - | 0.052 | |
| IP-10 | 28.2 (±16.5) | 12.3 (±8) | -15.9; 95% CI: -23.1, -8.7 | | | ↓ | | <0.001 | 30.9 (±20.2) | | | 13.4 (±6.7) | | | -17.5; 95% CI: -29, -6 | | ↓ | 0.006 | |

# Standard Deviation (SD)

*: P-value = difference within groups before (day-2) and after treatment (day 10) and controls. CI= confidence intervals

Ψ Increase (↑) Decrease (↓) No change (-)

IL= Interleukin; Brain Derived Neutrophic Factor (BNDF); Interferon gamma inducible protein-10 (IP-10); Placental Growth Factor (PIGF); Stem cell Factor (SCF); Hepatocyte Growth Factor (HGF); Vascular Endothelial Growth Factor A (VEGF-A); Platelet Derived Growth Factor- (PDGF).
