# Supplementary material for: Nasal anti-CD3 mAb (Foralumab) dampens CD3+ T effector function and decreases NKG7 in COVID-19 through a mechanism involving GIMAP-7 and TGFb1
Source: Research Square preprint supplement (doi:10.21203/rs.3.rs-2061549/v1), 2022-10-13
Supplement: Supplementary file 10 [file c28044a853fad9c54f7dbce3.xlsx]

## Sheet: Sheet1
Supplementary Table 2: Differently expressed genes comparing all COVID-19+ subjects at baseline vs Healthy controls using Bulk RNA-seq
p<0.05
T cells						Monocytes						B cells
gene	log2FoldChange	pvalue	padj			gene	log2FoldChange	pvalue	padj			gene	log2FoldChange	pvalue	padj
CISH	-2.26636	4.89332e-13	3.32117e-10			GIMAP8	-3.17173	2.50189e-26	9.10494e-24			TNFAIP8L2	-2.93765	5.98521e-09	9.44409e-07
TNFAIP8L2	-1.9982	1.22926e-05	0.000981547			GIMAP7	-3.12617	8.11813e-18	1.16384e-15			LCN10	-2.47302	4.98255e-09	8.26174e-07
TRIP11	-1.9713	1.40138e-13	1.21054e-10			CCR2	-2.56552	1.49465e-10	7.56276e-09			ABCF2-H2BE1	-2.39555	2.28513e-06	0.000155246
GIMAP6	-1.96765	1.44652e-14	1.5272e-11			MS4A14	-2.44395	1.76306e-15	1.98596e-13			PLEKHF2	-2.22824	5.09697e-13	1.91783e-10
C17orf80	-1.88387	1.12513e-05	0.000924421			MYCL	-2.3378	2.99303e-09	1.19494e-07			CD180	-2.09683	1.75896e-12	6.1457e-10
EPHA1	-1.80867	2.12744e-07	2.88785e-05			TRIM27	-2.24689	1.33058e-18	2.09832e-16			SH2D3C	-2.02982	1.34376e-19	1.0955e-16
SIT1	-1.76621	1.00416e-07	1.56418e-05			DEXI	-2.21929	5.91901e-09	2.2313e-07			METTL13	-1.899	6.5393e-07	5.61175e-05
LRRN3	-1.75759	1.80712e-05	0.00135207			TNFAIP8L2	-2.14047	1.66987e-14	1.64586e-12			TREML2	-1.88208	1.20215e-07	1.20007e-05
LDLRAP1	-1.72527	2.26731e-11	1.0772e-08			P2RY13	-2.0831	6.48818e-10	2.86874e-08			HVCN1	-1.79139	8.76786e-15	4.2888e-12
GIMAP4	-1.70721	1.5025e-09	4.19904e-07			NFE2	-2.05133	4.79561e-10	2.19208e-08			ZNF17	-1.76318	8.07271e-05	0.00264448
GIMAP7	-1.70464	7.3558e-18	6.98948e-14			TNFRSF10C	-2.04321	6.57391e-08	1.90221e-06			LPAR5	-1.75998	4.20801e-08	4.90083e-06
SH2D3C	-1.6858	9.90603e-07	0.000123851			CALHM2	-1.99633	2.49233e-15	2.77441e-13			ZNF181	-1.71925	1.09972e-05	0.000527155
MYC	-1.60223	4.64662e-06	0.000445982			SLC40A1	-1.988	1.08567e-06	2.28789e-05			BOLA1	-1.70609	7.65995e-05	0.00257368
DENND2D	-1.55262	8.43295e-15	1.12253e-11			GIMAP6	-1.98799	3.01185e-07	7.28853e-06			TRDMT1	-1.69988	7.12444e-06	0.000389377
ZNF318	-1.54972	0.000236148	0.00984159			SLC46A2	-1.97873	1.73617e-12	1.24452e-10			TLR10	-1.69845	8.98981e-12	2.83701e-09
CALHM2	-1.54271	0.000215585	0.00914503			TMEM223	-1.93773	4.02109e-08	1.21558e-06			C6orf47	-1.6912	1.5759e-06	0.000115053
HRH2	-1.52661	0.000279356	0.0108345			PPBP	-1.93374	0.000537323	0.00495531			PTCH1	-1.62726	0.000473406	0.00999987
C1orf74	-1.50657	0.000497271	0.0171198			AGGF1	-1.90162	1.22295e-07	3.31562e-06			ZNF133	-1.61171	0.000159793	0.00448286
HSPA1A	-1.49836	0.000979324	0.0277687			ZNF22	-1.89863	2.41455e-08	7.54008e-07			ZNF860	-1.60319	1.46779e-05	0.00067415
GIMAP8	-1.49227	8.87641e-08	1.40573e-05			KRCC1	-1.88845	3.08594e-07	7.44877e-06			TRMT1L	-1.59639	0.000907259	0.0170003
ST6GAL1	-1.49223	1.71581e-06	0.000196429			SLC35A1	-1.88246	8.34767e-09	3.01472e-07			ID3	-1.58236	0.000231437	0.00591162
LPAR6	-1.48619	6.68426e-06	0.000622684			HSPA1A	-1.87071	0.000171247	0.00189957			GLYATL1B	-1.58185	0.000251785	0.00626771
THEM6	-1.48515	0.000261716	0.0103889			ARMC7	-1.86586	2.04672e-06	4.05997e-05			HEBP1	-1.5473	0.000251653	0.00626771
TDRKH	-1.47409	0.000716614	0.0219989			HEATR5A	-1.86197	6.23808e-06	0.000109103			C12orf76	-1.54613	0.000656538	0.0132705
SPECC1L	-1.4692	0.000159703	0.0073665			RGS14	-1.8604	5.94002e-08	1.72937e-06			LBH	-1.54513	2.16872e-06	0.000148368
TRAV9-2	-1.46254	0.000132426	0.00629156			ADGRE3	-1.84762	3.18751e-07	7.67436e-06			S1PR4	-1.53956	2.17962e-05	0.000923082
BCL2L1	-1.46229	0.000325254	0.0121676			ZNF217	-1.84468	2.25322e-13	1.85391e-11			SIGLEC5	-1.52941	0.000694005	0.0138844
RGS14	-1.45937	1.72658e-05	0.00130206			FRAT2	-1.84168	1.54268e-07	4.04345e-06			TCL1A	-1.52282	0.00017236	0.00476328
C14orf132	-1.45387	0.00133937	0.0338476			EEA1	-1.83725	1.17054e-06	2.45036e-05			CCR6	-1.52108	5.08265e-06	0.000294222
GIMAP5	-1.45188	6.51294e-09	1.34535e-06			LPAR6	-1.81735	2.15233e-10	1.0607e-08			LRRC25	-1.50679	0.00019365	0.0052046
AARS1	-1.44295	8.508e-06	0.000748546			DOK1	-1.79374	4.11625e-11	2.27766e-09			TRIM35	-1.50516	2.60565e-05	0.00108013
GPR171	-1.42232	3.2236e-05	0.00202852			GIMAP1	-1.79126	2.9189e-13	2.34056e-11			EARS2	-1.50287	0.00188934	0.0294322
GLRX	-1.4042	1.05012e-06	0.000129588			C14orf119	-1.78414	2.09709e-08	6.72632e-07			C14orf119	-1.49557	1.91526e-06	0.000133835
TAGAP	-1.39102	4.03436e-10	1.32188e-07			INTS5	-1.77786	1.07305e-05	0.000175966			GCNT1	-1.49545	0.000130291	0.00379355
AGFG2	-1.38578	0.000575565	0.0188911			ZMYM3	-1.77651	1.82976e-06	3.69152e-05			C16orf54	-1.49491	1.39503e-18	9.74828e-16
MRPL52	-1.35931	0.000108303	0.00544494			ZNF143	-1.72799	2.18356e-07	5.50956e-06			INSIG2	-1.48454	0.00112018	0.0199562
FKBP15	-1.35829	1.86873e-05	0.00137737			GAPT	-1.71804	1.19098e-08	4.11279e-07			ZNF594	-1.46633	3.31902e-05	0.00130519
GIMAP1	-1.35285	1.58531e-05	0.00120509			RGS3	-1.70527	7.08108e-06	0.000122488			DEXI	-1.46541	7.46242e-07	6.18685e-05
SLAMF1	-1.34312	0.000241206	0.00992181			MRFAP1L1	-1.6931	5.76895e-07	1.2935e-05			KIAA0040	-1.44683	3.32201e-05	0.00130519
UNG	-1.33912	0.00022516	0.00946666			GIMAP5	-1.67787	6.85102e-06	0.000119111			DPH5	-1.44422	6.90181e-06	0.000379328
ABCD2	-1.31249	0.000186389	0.00808705			FAM118B	-1.67696	6.33584e-07	1.40727e-05			ZNF232	-1.44075	0.000593334	0.0121945
C5orf63	-1.30978	0.0019889	0.0442112			TTC4	-1.66717	1.8214e-06	3.68251e-05			WNT16	-1.43479	4.68436e-05	0.00172932
CDK4	-1.30387	0.000103543	0.00528959			ARMCX5	-1.66108	0.000137636	0.00157856			TXNDC9	-1.42358	0.000111932	0.0033385
LCP2	-1.30144	4.59802e-05	0.00271369			MRM2	-1.65058	3.56508e-06	6.67976e-05			ZNF322	-1.42203	0.000874756	0.0165207
LY9	-1.29962	1.39456e-07	2.07049e-05			PREPL	-1.62614	4.55885e-05	0.00062335			SPSB2	-1.41937	0.00148373	0.024686
CD200R1	-1.29342	0.00151102	0.0369092			FRAT1	-1.62426	9.47996e-06	0.0001582			FANCF	-1.41118	0.000328762	0.00762152
ZNF816	-1.27714	0.00223991	0.0481529			RCHY1	-1.62265	1.51015e-05	0.00023885			ANXA2R	-1.41017	0.000182569	0.00498904
MRPS14	-1.27156	0.000304707	0.0115813			BRD8	-1.62225	2.57876e-06	4.95939e-05			ERLIN1	-1.40872	0.00236731	0.0351432
DUSP7	-1.26979	0.0011825	0.0312983			CDC23	-1.62174	2.16261e-07	5.47128e-06			DPEP2	-1.40863	2.73898e-06	0.000182632
ZNF420	-1.25846	0.00165333	0.0390032			CASP8AP2	-1.60576	0.00146269	0.0110191			INTS5	-1.40262	0.00058177	0.0120327
PPP1R12B	-1.25585	0.00118212	0.0312983			PWWP2A	-1.59033	3.70594e-05	0.000527302			ZNF512	-1.39736	2.6234e-08	3.40963e-06
LIMA1	-1.24385	0.000549891	0.0182695			RGS18	-1.59012	4.23619e-07	9.82422e-06			ZNF577	-1.39433	0.000414159	0.0090647
CHCHD1	-1.22712	0.00167471	0.0391948			NFXL1	-1.58992	0.000556535	0.00509278			MSH2	-1.39328	9.52634e-06	0.000484938
PYCARD	-1.22657	0.000489491	0.0169132			HSPA6	-1.5897	1.94322e-10	9.67725e-09			THEM6	-1.3796	0.00277662	0.0390844
C14orf119	-1.22581	0.000722338	0.0219989			CACNA2D3	-1.5866	2.72866e-07	6.75598e-06			ABHD10	-1.37533	0.000276316	0.00665813
CCDC65	-1.21752	0.00176346	0.0406714			ANKZF1	-1.57972	4.22053e-05	0.000589007			DOK1	-1.36843	3.21847e-05	0.00129573
ZNF33B	-1.21708	0.000546176	0.0182695			CMTR2	-1.5704	0.000321172	0.0032124			TRIM32	-1.36471	0.000950811	0.017617
RNF214	-1.21432	0.000539989	0.0181949			S100Z	-1.55907	3.2597e-07	7.82824e-06			TMEM216	-1.36371	8.7319e-05	0.00275562
METTL13	-1.21289	0.000129203	0.0061693			THAP3	-1.55809	7.74684e-06	0.000133032			S100PBP	-1.36245	1.57341e-07	1.52402e-05
LBH	-1.18836	1.03862e-05	0.00086582			LYPLAL1	-1.557	7.32904e-05	0.000935862			PRUNE1	-1.36178	3.61653e-05	0.00140399
ZC3H14	-1.1641	0.0012532	0.0325351			FNTB	-1.54685	2.47062e-05	0.000370545			ILK	-1.36107	2.31595e-08	3.06175e-06
PAPSS1	-1.16107	0.000325095	0.0121676			PRKAB2	-1.54626	4.42891e-05	0.000610879			B3GALT4	-1.36078	0.00255097	0.0367841
KLHL22	-1.14774	0.00153275	0.0370716			METTL13	-1.53835	9.98099e-06	0.000165684			ZIK1	-1.36007	0.000466724	0.00990448
HPS3	-1.13652	0.00137666	0.0342933			TMED7-TICAM2	-1.53817	0.00499579	0.0288998			RASSF7	-1.35633	2.14815e-05	0.00091371
LAIR1	-1.13274	0.000361293	0.0132549			TMEM80	-1.52348	7.39111e-06	0.000127386			SLA	-1.34004	6.96008e-08	7.5656e-06
MRPS31	-1.12774	0.000766522	0.0231958			RASSF1	-1.52137	4.16347e-12	2.83415e-10			OSGEPL1	-1.33233	0.0018309	0.0288993
CYB561D1	-1.12538	2.52694e-05	0.00167909			DAPP1	-1.52058	9.9942e-14	9.00621e-12			UNG	-1.31239	0.000968093	0.0178001
DAXX	-1.11838	3.6083e-06	0.000364746			MRPL17	-1.5186	5.42346e-05	0.000721755			CCDC18	-1.31205	0.000652202	0.0132101
THEMIS	-1.11626	4.00471e-07	5.2127e-05			AGAP6	-1.51698	3.11147e-05	0.000450854			FKBP4	-1.31167	0.000410478	0.00902406
CD27	-1.11002	5.31516e-08	9.01869e-06			ITGAE	-1.50731	8.82387e-10	3.8124e-08			SNX30	-1.29209	0.002319	0.0346893
DMAC1	-1.10851	0.00182966	0.0417303			NHSL2	-1.50399	2.53314e-12	1.76239e-10			ABCB4	-1.2909	0.00063666	0.0129759
TRIM52	-1.10575	1.96874e-05	0.00142801			HENMT1	-1.49829	2.81563e-05	0.000412407			CLCN4	-1.28718	0.000841533	0.0160962
ACTR3	-1.10237	5.35024e-05	0.00300816			IMP3	-1.49637	1.50693e-06	3.08524e-05			SPRYD3	-1.28573	4.54548e-05	0.00169081
NABP1	-1.10095	0.000303911	0.0115813			PEX11B	-1.49432	5.58269e-06	9.87353e-05			IGKV3-15	-1.2856	0.00129256	0.0223807
NUAK2	-1.10076	0.00087213	0.0253425			MRPL34	-1.4904	2.83736e-06	5.40183e-05			PRMT6	-1.28408	0.000896645	0.0168876
DNAJA3	-1.08676	0.000408097	0.014578			NIF3L1	-1.4793	6.01611e-05	0.000793701			PWWP2A	-1.27562	0.0036141	0.0468923
SNX14	-1.08521	0.00102438	0.0286285			ADGRD1	-1.47663	0.000174274	0.00192638			ZNF790	-1.27551	0.000842407	0.0160962
FMNL3	-1.0771	3.5078e-05	0.00216436			TMEM129	-1.4752	3.67872e-05	0.000524217			SYT17	-1.27255	0.00236405	0.0351432
SIRPG	-1.07136	7.43423e-06	0.000666415			FKBP4	-1.46962	2.67871e-05	0.000394183			SRR	-1.26743	0.00366655	0.0472593
HSPA8	-1.06888	1.08449e-12	6.86991e-10			RASSF7	-1.46118	7.53255e-05	0.000955402			ZNF75D	-1.26033	0.000451721	0.00964889
PTPN6	-1.06674	7.03412e-08	1.15238e-05			TMEM144	-1.46113	0.000158922	0.00178589			RNASEL	-1.25865	6.93422e-05	0.00237194
FANCF	-1.06458	0.000545281	0.0182695			HHEX	-1.45519	1.68288e-05	0.000262762			DAXX	-1.25626	1.9348e-07	1.76899e-05
AKTIP	-1.06182	0.00010503	0.00531846			LUC7L3	-1.4525	7.85551e-13	5.89912e-11			CR2	-1.25548	0.000149169	0.00426703
JPT1	-1.06177	0.000595146	0.0191698			ARFIP1	-1.45032	0.000188194	0.00205622			DUSP6	-1.25264	0.00171641	0.0275724
CFAP298	-1.05078	0.00104264	0.0288936			ASTE1	-1.44995	7.38664e-05	0.000941946			ARL11	-1.24442	8.48301e-05	0.00269574
WDR6	-1.04792	6.79518e-05	0.0035871			UTP6	-1.43539	6.78446e-07	1.49638e-05			PLEKHO2	-1.23882	0.00243129	0.0357137
CDK2AP2	-1.02424	0.0008045	0.0238886			MOGS	-1.4293	7.1114e-05	0.000910529			CBR1	-1.23659	0.00127758	0.0221999
JAML	-1.01385	0.00201918	0.0445186			RPP25L	-1.42708	2.08447e-05	0.000319664			SLAMF6	-1.23642	1.73861e-05	0.000769628
AP2B1	-1.00602	0.000286495	0.0109769			HSPA8	-1.42508	2.37616e-07	5.96372e-06			GAPT	-1.23537	0.000169524	0.00471151
COG4	-0.995986	0.000156024	0.00724776			ZNF862	-1.42351	0.00018013	0.00197955			STIP1	-1.22883	9.40566e-07	7.42061e-05
ESYT1	-0.99529	2.96275e-10	1.00543e-07			PRMT5	-1.41908	0.000188005	0.00205622			ZNF772	-1.22481	0.00288921	0.0402065
GIMAP2	-0.983067	0.000171569	0.00775254			MKKS	-1.41601	0.00106966	0.00860636			TMEM80	-1.22418	0.000290468	0.00688051
UNC45A	-0.974079	0.00104553	0.0288936			MIGA2	-1.41553	4.04735e-05	0.000568698			ZNF419	-1.2239	0.0024933	0.0361898
SPRYD3	-0.973155	0.00146667	0.036011			TRANK1	-1.4117	0.000178545	0.0019667			TTC9C	-1.2231	0.00245604	0.0359013
ARPC5	-0.967682	1.93547e-05	0.00141468			TTC27	-1.41065	0.00217155	0.015075			ZNF302	-1.21835	0.000203023	0.00531218
BTN3A2	-0.966209	0.0007221	0.0219989			TMEM115	-1.4007	2.61029e-05	0.000386519			CD79B	-1.21828	1.598e-07	1.53167e-05
USO1	-0.965414	0.00143891	0.0354943			ADHFE1	-1.39405	0.000201203	0.00216339			PTPN6	-1.21564	3.16899e-13	1.24009e-10
MRPS6	-0.964654	0.00019017	0.00819892			ZNF224	-1.38764	0.000130853	0.00152292			KIAA0753	-1.21263	0.00296398	0.0405548
CERT1	-0.963016	0.00165831	0.0390032			F2RL1	-1.37528	0.00276489	0.0180548			LINS1	-1.21156	0.000349895	0.00792367
CD40LG	-0.960079	0.00223267	0.0481062			SDAD1	-1.37421	1.96304e-05	0.000303006			SIT1	-1.2081	0.00220309	0.0332093
SLF2	-0.95804	0.00233252	0.0496071			DNAJA3	-1.37294	0.000138815	0.00159013			BTLA	-1.20739	0.000866732	0.0164645
TRAF3IP3	-0.945318	6.90848e-06	0.000637324			HDHD3	-1.36897	0.000298689	0.00303565			ZNF585A	-1.20512	0.00243937	0.0357251
STIP1	-0.943886	0.000174339	0.00775254			POLD3	-1.3688	0.00100946	0.0082483			PGBD2	-1.20334	0.000257519	0.00637083
ING4	-0.939089	0.00184625	0.0417691			NFYB	-1.36609	0.000162378	0.00181825			MBD4	-1.1998	4.13714e-08	4.87634e-06
ZNF234	-0.928825	0.000471826	0.0165435			HSPH1	-1.3654	0.000119896	0.00141453			OSGEP	-1.19173	9.06085e-05	0.00283202
HMGN4	-0.924453	0.000192801	0.00825223			TMEM245	-1.36481	5.60942e-07	1.27413e-05			AHSA1	-1.18876	1.03559e-05	0.000511674
ACTG1	-0.922918	1.12853e-05	0.000924421			BTN3A2	-1.36453	5.41699e-08	1.60174e-06			ACTR3	-1.1887	0.000142186	0.0040912
RNF20	-0.921988	0.00083075	0.024439			AASDHPPT	-1.36194	0.000149629	0.00169353			CMTR2	-1.18373	0.00239033	0.035271
BRD8	-0.919961	0.000259644	0.0103661			PPP1R21	-1.36012	4.8531e-05	0.000655065			VPS35	-1.18305	3.13443e-06	0.000204428
CNPY2	-0.904008	0.0019178	0.0430802			REX1BD	-1.35772	4.23009e-05	0.000589472			TASL	-1.17546	0.000610262	0.0124737
PRUNE1	-0.903916	0.000275458	0.0107271			EEF1AKMT4	-1.35708	0.000136715	0.0015699			DPY30	-1.17148	0.00113328	0.020085
RAB7A	-0.903184	0.000147553	0.00690667			GPN3	-1.35351	0.000489771	0.00457474			CD24	-1.17002	5.55363e-05	0.00195436
ACTR1A	-0.901057	9.98652e-05	0.00512929			HMGCL	-1.35198	2.22664e-06	4.38013e-05			PIGU	-1.16918	0.000903005	0.016956
ATP6V0E2	-0.888534	0.000105227	0.00531846			TSPAN4	-1.34783	1.62414e-05	0.00025443			ZNF234	-1.16699	0.000340943	0.00777391
CASP2	-0.883272	3.70875e-06	0.000370953			SUFU	-1.34384	0.000138981	0.00159013			MCM3	-1.16665	1.9596e-05	0.000844525
OARD1	-0.869367	0.00199262	0.0442112			TENM4	-1.33837	0.00543141	0.0307185			STX10	-1.16555	0.00161058	0.0263484
FAM217B	-0.864022	0.000335252	0.0123952			RNF20	-1.33784	1.3665e-06	2.81083e-05			ZFP3	-1.16057	0.000957736	0.0176784
UBQLN2	-0.861886	0.000717769	0.0219989			TOP3B	-1.33759	0.000709932	0.00617974			RALB	-1.15474	0.000419437	0.00912291
RAB5B	-0.854784	0.00219634	0.047539			NSL1	-1.33633	0.000448826	0.00424679			TRAC	-1.15128	0.00358771	0.0466116
ZNF337	-0.835633	0.00121205	0.0319029			HPF1	-1.3359	0.00117328	0.00923591			MRPS31	-1.14765	0.00138714	0.0233569
HDAC1	-0.830495	1.34236e-05	0.00106293			RTN1	-1.33419	0.00140601	0.0106943			FGD2	-1.14614	9.60991e-08	1.00015e-05
KIAA0040	-0.829475	0.00181578	0.0415748			TNFRSF8	-1.33418	5.97633e-07	1.33368e-05			SRSF1	-1.13967	3.51366e-05	0.00136949
STK38	-0.827433	1.74909e-06	0.000197855			ASGR1	-1.33311	1.38716e-07	3.69726e-06			RBM4B	-1.13548	1.10364e-05	0.000527155
TRAF5	-0.823867	0.000134053	0.00633717			PAQR7	-1.32767	2.88633e-06	5.48402e-05			HIF1AN	-1.13411	0.000257881	0.00637083
THOC2	-0.8225	0.00151501	0.0369119			TRAFD1	-1.32753	5.85167e-07	1.30895e-05			GRAPL	-1.13384	0.00343245	0.0449527
CYBC1	-0.818904	5.30591e-05	0.003001			NBPF1	-1.32542	0.000783892	0.00671847			CD72	-1.1333	0.000792994	0.0153926
SCAMP2	-0.815601	0.00174624	0.0405691			GIMAP4	-1.32436	0.000210321	0.00224611			TSFM	-1.12803	0.00125692	0.0219579
CORO1A	-0.814522	0.00106871	0.0294326			AARS1	-1.32306	0.000142027	0.0016191			WDR89	-1.12613	0.00232549	0.0347333
ATF7IP	-0.812387	0.0023475	0.0497901			SOS1	-1.32171	0.000102115	0.00123399			CASP2	-1.12475	2.56997e-07	2.30661e-05
VPS35	-0.801962	0.000285855	0.0109769			DCLRE1B	-1.31858	0.000672086	0.00593216			RPAP3	-1.12275	0.000268202	0.00653238
TMEM63A	-0.791097	0.000866057	0.0252432			ZNF512	-1.31781	9.21384e-05	0.00112929			SLC8B1	-1.11982	0.000790054	0.015366
PARP1	-0.78389	5.82309e-05	0.0031926			NLRC4	-1.31748	0.000263408	0.00273586			GOLPH3L	-1.11711	0.00282225	0.0396127
RPA2	-0.783218	0.00183575	0.0417303			ZFP36L2	-1.31511	2.95337e-05	0.000429919			FBXL4	-1.10907	0.000338723	0.00776432
NUP62	-0.782525	0.0010753	0.0294453			SEMA4B	-1.31503	0.000312599	0.00314996			CCDC32	-1.10902	5.55895e-09	8.91527e-07
ICAM3	-0.772082	0.000123847	0.00600407			MXD3	-1.315	0.000191893	0.00208461			ING4	-1.10705	5.34071e-05	0.00190084
CAMK2G	-0.767877	0.00160025	0.038236			ASB13	-1.31219	0.00010204	0.00123399			RPS6KA1	-1.0999	0.000189496	0.00512111
SEC22B	-0.76032	0.000985886	0.0277802			ZSCAN25	-1.29964	2.475e-05	0.000370545			AP3M1	-1.09692	1.10464e-05	0.000527155
TNFAIP8	-0.753868	0.00021156	0.00901456			CASP2	-1.29654	6.14473e-11	3.32237e-09			NAPSA	-1.09646	5.75686e-06	0.000330063
LASP1	-0.748453	6.48902e-05	0.00348354			CD244	-1.2931	3.34027e-07	7.98122e-06			HDAC2	-1.08966	0.000196154	0.0052431
PRKACB	-0.747958	0.000746914	0.0226747			EPRS1	-1.29261	6.99283e-08	1.99296e-06			TNFAIP8	-1.0876	3.06546e-07	2.70187e-05
SBNO1	-0.74472	0.000267941	0.0105206			KBTBD11	-1.29088	0.00382858	0.0234777			SETDB1	-1.0862	0.000995519	0.0181701
RAC2	-0.736632	1.5359e-05	0.00119624			MSTO1	-1.29073	0.000412342	0.0039731			THAP3	-1.08529	0.00202791	0.0310957
RPS6KA1	-0.722567	0.00176776	0.0406714			THAP11	-1.2894	0.000797344	0.00679682			ZNF280B	-1.08158	0.0029375	0.0404107
TWF2	-0.709205	0.00233365	0.0496071			RASSF4	-1.28869	2.52623e-06	4.86827e-05			OXNAD1	-1.07512	0.00290162	0.0402635
CRLF3	-0.709092	0.000837219	0.0245533			ALDH1A1	-1.28787	2.21564e-05	0.000338682			LARGE2	-1.0748	0.00304627	0.0412765
TRAT1	-0.701541	0.00109798	0.0298551			IFFO1	-1.28292	1.56606e-08	5.27331e-07			WDR77	-1.07198	3.79766e-06	0.00024125
CD53	-0.689927	5.98414e-05	0.00324922			RIOX2	-1.27938	0.00285605	0.0185302			UTP3	-1.07083	0.000775413	0.0151414
CASP4	-0.689207	0.0012859	0.0331411			WDR5	-1.27894	0.000207217	0.00221547			LAIR1	-1.06798	0.00170907	0.0274997
C16orf54	-0.687293	0.000176087	0.00775254			GCDH	-1.27758	0.000196963	0.00212504			GDI2	-1.06241	4.47885e-08	5.15489e-06
LPXN	-0.687056	0.000125157	0.00603677			KIAA0040	-1.27484	4.25351e-06	7.79974e-05			RNF113A	-1.0611	9.502e-05	0.00294171
CAPN1	-0.681258	0.000861915	0.0251998			NOA1	-1.27481	0.000526428	0.00487861			GTF2H5	-1.05961	0.00295366	0.0404701
ERCC6L2	-0.661873	0.00107174	0.0294326			PIP4K2B	-1.27371	1.27805e-06	2.64616e-05			CD1D	-1.05496	0.00103153	0.0186534
SLC35E2B	-0.654173	0.0011791	0.0312983			PLEKHJ1	-1.27339	2.96329e-07	7.18941e-06			PIGP	-1.05098	0.00220292	0.0332093
VPS33A	-0.651836	0.000713865	0.0219989			TRIM21	-1.27092	8.22341e-06	0.000139695			MLX	-1.05034	0.000371648	0.00833906
LDHB	-0.646806	0.000710228	0.0219989			RCBTB2	-1.26998	2.37682e-11	1.37131e-09			LTA4H	-1.04685	0.00091874	0.0171527
FCMR	-0.639312	0.000910197	0.0262082			SNX33	-1.26863	0.00214242	0.0149285			BUD13	-1.0465	0.00180893	0.028682
SH3KBP1	-0.630227	0.000644264	0.0204025			STK38	-1.26726	1.67072e-06	3.39235e-05			SNX1	-1.04035	1.80196e-05	0.000790518
CBX5	-0.624957	0.000549404	0.0182695			NCF1	-1.26702	4.83342e-06	8.72783e-05			CAT	-1.03865	6.10227e-06	0.000345078
LCK	-0.62294	5.74746e-05	0.0031926			AAMP	-1.26563	4.83774e-10	2.20071e-08			CRKL	-1.03623	0.000278633	0.00668104
TRAC	-0.601935	0.000988182	0.0277802			RBM6	-1.26079	3.73452e-06	6.94225e-05			PCED1A	-1.03596	0.000668377	0.0134288
CLIC1	-0.597325	0.00122836	0.0321477			MRPL35	-1.26068	0.00208584	0.0145978			FGR	-1.03408	0.000846734	0.0161474
CCDC144A	-0.58587	0.00226306	0.0483228			TXNIP	-1.26042	3.54849e-12	2.43303e-10			SNAPC3	-1.03134	0.000450278	0.0096391
FYB1	-0.584604	0.00123283	0.0321477			APOL2	-1.25593	1.55879e-07	4.07437e-06			MRFAP1L1	-1.02333	0.00087377	0.0165207
VSIR	-0.582402	0.000328581	0.0122438			CBX7	-1.25321	0.00230538	0.0157677			DCK	-1.02327	0.000259962	0.00640606
FGD3	-0.57578	0.000253435	0.010204			EIF4ENIF1	-1.24962	0.00261387	0.0173318			CLEC17A	-1.02009	0.000196058	0.0052431
ACTB	-0.497588	0.000229293	0.009598			UMPS	-1.248	0.000669487	0.00592027			QRSL1	-1.01155	6.75829e-06	0.000373539
HNRNPDL	0.368714	0.00187196	0.0422503			MRPL36	-1.2367	3.54157e-05	0.000506199			CIPC	-1.00762	0.000199439	0.00526581
	0.397981	0.00112156	0.03019			TIMM44	-1.23523	0.000721925	0.00625536			BRD3OS	-1.00467	0.000117177	0.00347376
YWHAZ	0.440659	0.000531789	0.0179824			INTS3	-1.23449	3.36255e-05	0.000482067			EMSY	-1.00418	0.0013809	0.023292
PTMA	0.47852	0.000176231	0.00775254			YDJC	-1.23024	0.00024743	0.00259843			PKNOX1	-1.00216	0.00155371	0.0257627
HMGN2	0.532687	0.00042567	0.0151487			GPR162	-1.22546	0.00145988	0.0110067			CEP250	-1.00078	0.00177949	0.0283723
TMED4	0.533593	0.00113198	0.0303844			ZNF692	-1.22433	0.00126059	0.00979289			CRYZ	-0.999981	0.00179761	0.0285487
RASA3	0.601805	0.000936802	0.0268117			TLR8	-1.22397	3.73229e-06	6.94225e-05			MED11	-0.99791	0.000336947	0.00775613
EIF4A1	0.631568	0.00158931	0.0382318			TNRC6C	-1.22392	0.00236499	0.0160827			HNRNPF	-0.991542	3.91929e-05	0.00149688
CNOT2	0.637838	0.000638093	0.0202781			DCAF12	-1.2224	0.000727854	0.00630096			DENND2D	-0.988064	9.86003e-05	0.0030144
WTAP	0.651476	0.00225659	0.0483228			TTC9C	-1.21843	3.47987e-05	0.000498132			ZNF671	-0.981174	0.000238984	0.00604129
YME1L1	0.663702	0.00137381	0.0342933			TPPP3	-1.21811	0.000193888	0.00209565			STX7	-0.979447	8.64235e-05	0.00273618
DAZAP2	0.665078	0.00205361	0.0449618			CYB561D1	-1.2173	1.107e-05	0.000180593			UTP6	-0.975154	0.00300489	0.0409426
SERINC1	0.686609	0.00160557	0.038236			RNF113A	-1.21683	0.000190227	0.00206888			TMEM63A	-0.97395	0.000333075	0.00768507
ARL4C	0.69645	0.00163605	0.0387675			LSM4	-1.21676	2.32764e-05	0.000353517			CIITA	-0.96978	3.98013e-05	0.00150778
LUC7L2	0.72203	0.00197948	0.0441526			CIITA	-1.21581	2.36706e-06	4.58957e-05			IL16	-0.969737	0.000193187	0.0052046
HSPA5	0.722881	0.000116647	0.0057429			PCED1A	-1.21546	0.000116108	0.00137844			TBC1D10C	-0.968462	0.000150931	0.00430482
UBC	0.732549	0.000572462	0.0188873			VNN2	-1.21532	0.000703165	0.00613212			ZNF92	-0.967994	0.00270662	0.0382643
EMC4	0.735359	0.00131057	0.0334759			COMMD3	-1.21483	1.73626e-06	3.51787e-05			LCK	-0.9677	0.00200784	0.0308848
UPP1	0.736522	0.00132197	0.0335655			MEGF9	-1.21346	4.71202e-05	0.000637842			MFSD1	-0.96735	0.000449854	0.0096391
FYN	0.737242	0.0021704	0.0471925			CX3CR1	-1.21297	0.000135493	0.00155776			ALOX5	-0.963046	4.54478e-06	0.000274681
NOL9	0.739917	5.21216e-05	0.00296563			HAL	-1.21281	0.00147078	0.0110624			BLOC1S3	-0.962936	0.0011252	0.0199779
SDCBP	0.750211	0.0020237	0.0445186			HGF	-1.21109	0.000300046	0.00303965			WDR37	-0.962256	0.000757564	0.0148522
MADD	0.75045	0.000828636	0.024439			TADA1	-1.20827	0.000521655	0.00483912			GM2A	-0.95824	0.00103073	0.0186534
NGDN	0.752888	0.00204406	0.0448559			MFSD8	-1.20538	0.00174865	0.0126111			MAT2B	-0.951492	7.02119e-05	0.00238228
PSMD7	0.75531	0.000465172	0.0163706			NCAPD3	-1.20507	0.00823892	0.0421844			C2CD5	-0.951267	0.000830234	0.0159258
ZPR1	0.755484	0.00143271	0.0354521			ZNF398	-1.20434	0.00103556	0.00838912			SNX22	-0.950927	6.69313e-07	5.68343e-05
WHAMM	0.760102	0.000799238	0.0238068			SCARB1	-1.20311	0.00180572	0.0129535			MPEG1	-0.948907	0.0013748	0.0232291
MKRN1	0.766237	0.00158843	0.0382318			NEURL4	-1.20303	0.00108068	0.00865823			FAM156A	-0.948619	0.00290351	0.0402635
MORF4L1	0.766264	0.000996138	0.0279213			NSUN5	-1.20197	0.000284233	0.00292646			JKAMP	-0.945865	0.00322307	0.0431345
KHNYN	0.766562	0.00111274	0.0300377			PPID	-1.20025	0.000410346	0.00395789			ARL6IP5	-0.940998	0.000159922	0.00448286
ZNFX1	0.77285	0.000519949	0.0176448			SOX4	-1.19862	2.30167e-05	0.000350698			MAT2A	-0.937642	4.44959e-05	0.00167424
CCNL1	0.774587	1.00772e-05	0.000862644			NKAPD1	-1.19798	0.00777912	0.04031			ZFX	-0.936744	0.000800188	0.0154708
FGF13	0.774832	0.000796415	0.0237973			WDR46	-1.19732	7.22183e-06	0.000124695			ARMC1	-0.934729	0.00293877	0.0404107
SMPD4	0.77962	0.00165438	0.0390032			TRIAP1	-1.19589	0.000146174	0.0016584			FMNL3	-0.931401	0.000172861	0.00476366
MYCBP2	0.78597	0.00178859	0.0410512			GCA	-1.1949	0.0010913	0.00869917			APEH	-0.928671	5.34326e-05	0.00190084
RBM3	0.787727	0.000190693	0.00819892			TM6SF1	-1.19374	0.00088837	0.00743872			DZIP3	-0.923683	0.00316933	0.0426036
DDX3X	0.800771	3.37241e-05	0.00209442			C11orf21	-1.19026	1.98882e-06	3.97354e-05			SPIB	-0.905102	0.00125622	0.0219579
MARCHF6	0.805977	2.49675e-05	0.0016749			IRF2	-1.1882	0.000189374	0.00206203			UCP2	-0.902636	0.000197459	0.0052493
SARAF	0.809491	0.00195296	0.0437429			SRPRB	-1.18793	1.22937e-05	0.000199525			RIPOR2	-0.899003	1.40842e-09	2.64972e-07
SAT1	0.811213	0.0016332	0.0387675			TMLHE	-1.18694	0.000662105	0.00586595			DNAJA3	-0.897249	0.00198992	0.0307542
SAP18	0.81328	0.00115719	0.0308866			MINDY1	-1.18429	1.38722e-05	0.000222473			NIBAN3	-0.895719	0.000234475	0.00597361
HERC1	0.814396	0.000283133	0.0109363			CLEC12A	-1.18248	0.000105231	0.0012684			VPS72	-0.894258	0.0025568	0.0367841
CRTC2	0.836707	0.00221269	0.047784			MAT2B	-1.1823	7.83023e-05	0.000985235			SHMT2	-0.892913	6.36112e-05	0.00221462
TIMM23	0.844833	0.00065485	0.0206039			HRH2	-1.18147	4.26736e-05	0.000592049			GLE1	-0.891754	0.00156277	0.0257818
KANSL2	0.860994	2.42635e-05	0.00165865			DGCR2	-1.17931	8.85379e-07	1.89965e-05			ESYT1	-0.891522	0.000409953	0.00902406
SMAP2	0.86262	0.000186324	0.00808705			ZNF395	-1.17927	0.0035973	0.0223051			CYB561A3	-0.874331	0.000263018	0.00646509
TBC1D15	0.869793	0.00068056	0.0213422			FGD3	-1.17887	4.93353e-08	1.47725e-06			HPS3	-0.873321	0.00263998	0.0375392
LITAF	0.871366	0.000177881	0.00778908			NLRX1	-1.17832	0.00436866	0.0258999			PNP	-0.869137	0.00200636	0.0308848
CLDND1	0.871674	0.00168745	0.0393959			C2CD2L	-1.17466	0.00189379	0.0135034			CAP1	-0.867928	0.00294149	0.0404107
RLIM	0.872086	0.00108186	0.0295397			NUP85	-1.17417	0.00043532	0.0041397			RPA2	-0.867588	0.00096979	0.0178001
IDS	0.873787	0.000264872	0.0104432			TRIP4	-1.17383	8.40724e-05	0.0010358			CCM2	-0.866632	2.04722e-05	0.000878418
DCTN4	0.873941	0.000503901	0.0172233			CIAO3	-1.17242	9.29544e-05	0.00113493			FCRLA	-0.863703	0.00384395	0.0490291
KLF3	0.877788	9.67614e-05	0.00501615			GASK1B	-1.172	2.44522e-05	0.000369007			CACYBP	-0.860511	0.00163507	0.0266041
ARFGEF2	0.891478	0.00123146	0.0321477			PHF14	-1.17107	0.0028559	0.0185302			MARCHF7	-0.86034	0.00303862	0.0412765
CYCS	0.892525	0.000369774	0.013428			JADE1	-1.17091	5.7254e-06	0.00010107			RAB37	-0.854174	8.37618e-05	0.00269553
DDX39A	0.895814	5.21164e-05	0.00296563			ABHD4	-1.16845	0.000536148	0.0049493			HSPA8	-0.853134	0.000799278	0.0154708
SRP19	0.898823	2.56757e-05	0.00169424			CANT1	-1.16418	0.000857315	0.00719779			PCK2	-0.852005	0.00255426	0.0367841
KAT6A	0.901318	0.000590298	0.0190783			MITD1	-1.16364	0.00150577	0.011254			VTA1	-0.848586	0.000658621	0.0132851
USP3	0.903435	0.000623324	0.0198753			STAT5A	-1.16253	3.23803e-10	1.51675e-08			LAT2	-0.846376	0.000270815	0.00655789
MTCH1	0.90519	0.00111128	0.0300377			COMMD8	-1.16118	0.0017783	0.0127956			LSM10	-0.845493	0.000268072	0.00653238
CDK11A	0.905851	0.00141635	0.0351388			C11orf24	-1.16083	0.000219474	0.00232289			MPI	-0.83322	0.00372976	0.047875
SRSF2	0.908176	0.00184039	0.0417359			NAGK	-1.16037	2.68978e-07	6.67998e-06			ARHGAP30	-0.832684	1.30917e-07	1.2937e-05
HERPUD1	0.909588	0.000778385	0.0234801			RAB37	-1.16002	4.75761e-05	0.000643093			NSUN5	-0.83156	0.00228417	0.0342731
NFKB1	0.911078	0.000163945	0.00752563			ARHGAP25	-1.15916	2.18942e-10	1.07338e-08			E2F5	-0.826351	0.00142152	0.0238129
UBE2B	0.912016	0.000330984	0.0122852			MIS18BP1	-1.15899	0.000134034	0.00154851			DHPS	-0.826108	0.00272812	0.038457
RBM8A	0.919632	2.00261e-06	0.000223868			PSIP1	-1.15846	0.00198107	0.0139887			TBCA	-0.825755	0.00201922	0.031011
HSPA9	0.922589	2.08347e-06	0.0002302			PANK2	-1.15609	1.22138e-05	0.000198569			SMIM14	-0.823835	0.000339684	0.00776432
S1PR2	0.926063	0.00153327	0.0370716			SMIM11B	-1.15608	0.00486916	0.0283346			LBR	-0.81561	0.000102903	0.00313613
HAUS3	0.926959	0.00199606	0.0442112			SLC46A3	-1.15561	0.00142305	0.010768			CTDSP2	-0.815029	0.0015928	0.0261011
PSME4	0.928127	0.000484979	0.0168801			DPH5	-1.1547	0.00245861	0.016534			WDR73	-0.812312	0.000248987	0.00622976
POLR3E	0.929178	0.00160436	0.038236			FMO5	-1.15455	0.000383875	0.0037349			TMEM109	-0.807196	0.000121123	0.00356911
SRSF7	0.935213	2.02978e-07	2.79521e-05			ATP13A2	-1.15433	0.00128514	0.00994277			DCP2	-0.806319	0.000382049	0.0085333
FOXO1	0.939783	0.000246198	0.0100402			OXLD1	-1.15358	0.00230632	0.0157677			CCT4	-0.805017	0.000342205	0.00777391
BRWD1	0.943222	0.000239625	0.00991533			SRSF1	-1.15252	0.000125574	0.0014707			WASHC4	-0.800963	0.000926115	0.0172247
GGA2	0.948206	0.0013034	0.0333824			TMEM11	-1.15006	1.56151e-08	5.27331e-07			TRIM13	-0.800517	1.816e-05	0.000793121
PIK3IP1	0.948973	0.00191171	0.0430451			EDEM3	-1.14952	0.000542872	0.00499675			CCS	-0.799863	0.000309299	0.0072563
TOE1	0.949901	0.000975355	0.027748			RSRP1	-1.14849	8.02937e-06	0.00013689			ZNF337	-0.797562	0.0023831	0.0352706
SF3B1	0.955383	6.17305e-05	0.00333275			NATD1	-1.1441	4.48601e-05	0.000617235			TRAF3IP3	-0.796983	0.000164939	0.00459714
SNRPA1	0.957703	0.000684603	0.0213983			IARS2	-1.1428	0.00228515	0.0156681			DUS2	-0.795706	0.00161813	0.0264277
EIF1	0.959982	2.48092e-09	5.98994e-07			APOL3	-1.14277	0.000845898	0.00710825			C5orf15	-0.795334	0.00376235	0.048051
HIPK1	0.973011	0.000262402	0.0103889			MRPS6	-1.14165	2.38631e-06	4.61743e-05			RGL2	-0.785568	0.00288048	0.0401801
CLK1	0.975805	0.00017525	0.00775254			GBGT1	-1.13976	5.30584e-06	9.45459e-05			DYNLL1	-0.785331	0.00229708	0.034414
SREK1	0.977552	0.00132467	0.0335655			DDX1	-1.13528	9.43787e-05	0.00114931			ZNF397	-0.784232	0.000236111	0.00598413
EIF1AD	0.977611	7.89258e-05	0.00412062			C1orf131	-1.13358	0.00112204	0.00890665			NCF1	-0.781949	0.002174	0.0330321
ATF4	0.983124	3.35008e-06	0.000346005			CYBC1	-1.13231	2.33015e-06	4.56477e-05			MRPS25	-0.778056	0.00293274	0.0404107
RIOK3	0.988927	2.01582e-05	0.00145109			ST6GAL1	-1.1321	0.00103688	0.00839002			CYBB	-0.776211	0.000701013	0.0139674
IKZF5	0.989197	0.000457794	0.0161708			TNFSF10	-1.13129	0.000974445	0.00803153			BTK	-0.774913	0.000419637	0.00912291
CHD4	0.994835	0.00130123	0.0333824			PGBD2	-1.13102	0.000255124	0.00266465			FLOT2	-0.760267	0.00017794	0.00487616
SNRPD1	0.999902	2.97868e-05	0.00189956			RPAP3	-1.13039	0.00205219	0.0143835			GANC	-0.749741	0.000672552	0.0134827
USP11	0.999982	0.000558034	0.0184754			IPCEF1	-1.12998	0.00101917	0.00829186			ZNF146	-0.74492	0.000301201	0.0070833
H3-3B	1.00172	3.38899e-12	1.78901e-09			CTDSP2	-1.12719	8.70576e-09	3.12022e-07			ANKZF1	-0.744594	0.000219359	0.00566225
DDX21	1.01603	1.86993e-05	0.00137737			DYNLL1	-1.12617	1.49869e-05	0.00023753			SNX17	-0.743892	0.00243649	0.0357251
KDM2A	1.03626	0.000245824	0.0100402			ZNF689	-1.12585	0.00118577	0.00931873			TRAF5	-0.740254	0.000955928	0.0176783
KLHL21	1.03789	0.00207988	0.0454323			RBM4B	-1.12472	0.00159199	0.0117316			RNF141	-0.738038	0.000589798	0.0121704
G3BP2	1.04257	0.00017244	0.00775254			CCDC66	-1.12441	0.00269599	0.017686			RETREG3	-0.737541	5.44707e-05	0.00193075
WDR26	1.04429	2.24201e-05	0.00154374			FARSA	-1.12366	2.63563e-05	0.000389661			HLA-DOB	-0.736369	0.000550682	0.0114381
ICOS	1.05021	0.000503076	0.0172233			MRPS5	-1.12136	5.20929e-07	1.18772e-05			CXXC5	-0.73448	0.000332973	0.00768507
LEPROTL1	1.05771	1.09839e-06	0.00013213			ABCC5	-1.12132	0.00173591	0.0125566			TES	-0.729077	0.00100683	0.0183423
CHMP1B	1.05796	4.09251e-05	0.00247688			CRLF3	-1.12092	2.25796e-05	0.000344594			CD53	-0.728813	0.00217783	0.0330321
CD6	1.05828	4.83771e-08	8.3578e-06			CCM2	-1.11915	2.11832e-08	6.77147e-07			FGD3	-0.720371	8.12948e-05	0.00265102
RHBDD2	1.06046	0.000351491	0.0129452			HVCN1	-1.1186	0.000671436	0.00593196			DNAJC16	-0.715317	0.00374244	0.0479219
RCL1	1.06078	0.00115088	0.0308046			DPH7	-1.11777	7.77601e-05	0.000982331			CNR2	-0.714232	8.08237e-05	0.00264448
CIB1	1.06676	5.99877e-07	7.70275e-05			BRD3	-1.11745	2.48499e-05	0.000371453			APBB1IP	-0.71261	0.00075722	0.0148522
RB1CC1	1.06702	0.000580531	0.0188911			NUP214	-1.1169	3.91807e-06	7.2126e-05			TRIB2	-0.709783	0.00238852	0.035271
LAP3	1.06909	0.000962167	0.027455			NBR1	-1.11519	0.000112917	0.00134732			ALOX5AP	-0.706925	0.00327268	0.0436194
ODC1	1.07566	0.00175924	0.0406714			TBC1D10C	-1.11448	0.00104602	0.00845215			KRI1	-0.698725	0.00330878	0.0439211
MAP3K2	1.082	0.000127374	0.00611265			GATD3B	-1.11392	0.00163333	0.0119588			P2RY8	-0.696193	0.00108492	0.0194036
RASGEF1B	1.08396	0.00134468	0.0338917			MON1A	-1.11048	0.00399848	0.0242999			HDAC1	-0.68933	0.00247387	0.0360306
KLF7	1.08598	0.000713117	0.0219989			TACC3	-1.10949	3.87659e-07	9.14719e-06			VCL	-0.67721	0.00156263	0.0257818
NDUFA6	1.08951	5.41476e-05	0.00302653			IPO11	-1.10941	0.00482626	0.0281282			ELP1	-0.66602	0.00367393	0.0472922
PPP2R5C	1.10336	1.10238e-08	2.18226e-06			DYRK4	-1.1089	0.00747685	0.0392597			PARP1	-0.662533	2.2586e-05	0.00095241
RNF125	1.10529	0.000252438	0.010204			MPHOSPH10	-1.10881	0.00099897	0.00819086			DCLRE1C	-0.658471	0.00170458	0.0274727
DDX24	1.10991	0.000892907	0.0258671			TMEM229B	-1.10814	0.00154802	0.0115243			EVL	-0.635818	0.00296827	0.0405567
HAUS8	1.12929	0.001287	0.0331411			ZNF524	-1.1078	0.00027703	0.00285965			NOTCH2	-0.613792	0.00169066	0.0272933
ACSF3	1.13522	0.002024	0.0445186			GIT2	-1.10299	3.64449e-06	6.80161e-05			PIK3CD	-0.611663	0.0025498	0.0367841
CHD7	1.14287	0.000270235	0.010567			DAXX	-1.10249	2.67466e-05	0.000394183			ATP6V0E1	-0.605097	0.00106431	0.0191049
LDHA	1.14329	1.03876e-05	0.00086582			MALSU1	-1.1013	0.00246181	0.0165438			IFI30	-0.590985	0.00318073	0.0426846
CENPC	1.14568	3.3298e-06	0.000346005			BOLA1	-1.10063	0.00166118	0.0121049			POM121	-0.551342	0.00178311	0.0283723
MAPK1IP1L	1.14747	4.83292e-10	1.53075e-07			GLRX	-1.09994	0.000549197	0.00505005			NCOA3	0.491805	0.000274105	0.00662115
RSRC2	1.1484	2.71745e-06	0.000293824			JAML	-1.09959	1.73371e-05	0.000270252			ZNF460	0.544954	0.00265128	0.037645
ETF1	1.15096	5.81167e-05	0.0031926			MRPS31	-1.09949	0.00265759	0.017499			RAD54L2	0.55161	0.00257876	0.0370455
PELI1	1.15125	6.65575e-05	0.00355123			CHAF1A	-1.0964	0.00757731	0.0395676			SRSF10	0.57762	0.00218581	0.0331018
PTAR1	1.15239	0.00104603	0.0288936			WDR6	-1.09426	0.00097629	0.00803974			HSP90AA1	0.597637	0.00259765	0.0370989
KDM6A	1.15557	0.000646302	0.0204025			APEX1	-1.09372	0.000128407	0.00149999			RBM25	0.59937	0.00321394	0.0430712
FTH1	1.15923	2.18854e-05	0.00153197			TTC5	-1.09126	0.000286927	0.00294778			YME1L1	0.619451	0.00280596	0.0394406
DENND4A	1.16102	1.6076e-06	0.000188585			NOTCH2NLA	-1.09054	5.63677e-07	1.27596e-05			BTG2	0.653635	0.000829125	0.0159258
ZBTB1	1.17571	0.000115341	0.00570817			UTP3	-1.08887	0.000422925	0.00403806			CDC42	0.661637	0.00221302	0.0333077
RIT1	1.17665	0.00226022	0.0483228			APC	-1.08863	0.005197	0.0297538			RSRC2	0.669829	0.0025861	0.0370965
GPCPD1	1.18106	2.237e-05	0.00154374			AHSA1	-1.08779	0.000383021	0.00373239			PRRC2C	0.674676	0.000379916	0.00850508
CD55	1.18468	8.34315e-06	0.000740903			GCNT2	-1.08697	0.000891989	0.00745553			COX19	0.675968	0.00338406	0.0446175
ULK1	1.18807	0.00126384	0.0327221			XPA	-1.0841	0.000793992	0.00678046			TAF1D	0.679396	0.00301941	0.0410833
TSPYL2	1.19166	0.000110123	0.00547846			PTRH2	-1.08261	0.00601285	0.0333491			ARIH2	0.682626	0.000244433	0.00614727
RIPK1	1.19207	5.05171e-05	0.00292691			ZNF808	-1.08196	0.00183643	0.0131479			CDV3	0.699482	0.00259372	0.0370989
ATR	1.19585	0.000430901	0.0152777			JKAMP	-1.08101	0.00123312	0.00964283			KAT7	0.700036	0.00117822	0.0208437
STRN3	1.20176	0.00166438	0.0390493			DPF2	-1.0793	9.66673e-07	2.06471e-05			RHOH	0.700316	0.00167697	0.0271619
UBE2Z	1.20274	0.000370252	0.013428			PRAM1	-1.07925	4.56858e-06	8.32908e-05			MORF4L2	0.70323	0.00213697	0.0326146
FMNL1	1.20375	0.000367451	0.013428			BICD2	-1.07873	3.84128e-05	0.000542481			DNTTIP2	0.703851	0.000454965	0.00967592
NPAS3	1.21072	0.000605762	0.0194458			FAM110A	-1.07207	0.0039961	0.0242999			SREBF2	0.704268	0.0033765	0.044578
RUNX3	1.21278	0.000508889	0.0173314			SORL1	-1.07153	1.57191e-06	3.20548e-05			BCLAF1	0.710147	4.39532e-06	0.000270437
BRD1	1.21279	4.99821e-05	0.00291368			TCEANC	-1.07128	0.00718033	0.0382547			MED13L	0.712263	0.00134529	0.0228887
GPR132	1.21296	0.00148556	0.0363809			BTN2A2	-1.06998	0.000810911	0.0068753			BAZ2A	0.717984	0.00271917	0.0383863
JMY	1.21865	2.73375e-05	0.00177918			SNAP47	-1.06924	0.00158978	0.0117245			IRGQ	0.722545	0.00183932	0.0289759
EZR	1.2206	2.89472e-05	0.00186711			ABCA7	-1.06848	1.33215e-05	0.000214367			ADAR	0.72332	0.00120062	0.0210873
FRS2	1.23428	0.00136073	0.0341152			NDUFA8	-1.06672	0.0020073	0.0141018			BOD1L1	0.729676	0.00297851	0.0406398
WDR74	1.23813	2.90816e-05	0.00186711			MRPS27	-1.0666	4.57352e-05	0.000624144			IRF9	0.734802	0.00156056	0.0257818
ETV3	1.24127	0.000907661	0.0262082			RPA2	-1.06575	1.99097e-05	0.000306816			C16orf72	0.736348	0.00185743	0.0291672
IL21R	1.24169	0.000387908	0.0139618			NLRP12	-1.06533	1.77302e-09	7.35802e-08			RAB30	0.739027	0.00075038	0.0148003
DENND3	1.24279	0.00183491	0.0417303			UBE3B	-1.06221	5.86882e-05	0.000775569			CHD4	0.742158	0.00217615	0.0330321
PLEKHA2	1.24513	1.14487e-05	0.000929791			COQ5	-1.0622	0.00335939	0.0210229			WDR43	0.743942	0.00288321	0.0401801
KBTBD2	1.25259	0.000249102	0.0101153			SLC1A5	-1.06212	0.000167463	0.00186635			MOB3A	0.747657	0.000363859	0.00818305
OTULIN	1.25379	2.19267e-05	0.00153197			OGFOD2	-1.06184	0.00101303	0.00826314			LDHA	0.75451	0.00119315	0.0209938
SBDS	1.25384	4.73305e-11	2.14159e-08			TRAF3IP3	-1.06088	5.36374e-09	2.03822e-07			CANX	0.75733	0.00173356	0.027801
TSC22D3	1.25463	1.84509e-10	7.01281e-08			ARHGAP24	-1.05867	0.0037403	0.0230109			SPPL2A	0.765337	0.00240308	0.0353524
PRKCD	1.25478	0.00098193	0.0277687			C6orf47	-1.05818	0.000256809	0.00267613			KDM2A	0.77131	7.68184e-05	0.00257368
IFI6	1.2646	0.00172794	0.0402423			VPS33B	-1.05735	0.00265312	0.017499			BAP1	0.774914	0.00366638	0.0472593
GNAS	1.26622	5.63805e-08	9.39872e-06			MFNG	-1.05618	9.59799e-05	0.0011658			HECA	0.777407	0.000897634	0.0168876
SNED1	1.26866	0.00109969	0.0298551			TNFAIP8	-1.05522	2.96849e-05	0.000430795			ZNF644	0.781998	0.00254313	0.0367841
KDM7A	1.2689	0.000121759	0.00596368			MRPS14	-1.05512	0.00549619	0.0310107			BUD23	0.794639	0.000152483	0.00433647
DBF4	1.27317	1.55336e-05	0.0012			PCTP	-1.05466	0.000716297	0.00621798			RPN1	0.800296	0.00290566	0.0402635
UBR1	1.2755	0.000578989	0.0188911			NOP56	-1.0538	6.81567e-07	1.49977e-05			MED13	0.817681	0.000779462	0.0151902
ZBTB21	1.27573	0.00144189	0.0354943			IMPACT	-1.05287	0.00626181	0.0344472			YPEL5	0.81946	4.4976e-05	0.00168583
DYNLT1	1.27635	3.81053e-06	0.000375235			EIF3L	-1.05016	0.000451504	0.0042636			EIF1AD	0.823153	0.000518591	0.0108405
DHCR7	1.27683	0.000782147	0.0235189			RBM14	-1.04854	0.000654426	0.00581425			SRPRA	0.823335	0.000719457	0.0142191
LGALS9	1.285	0.000921438	0.0264517			KCNB1	-1.04772	0.00946824	0.0468409			UBC	0.831214	0.000342487	0.00777391
ZC3H12A	1.28786	0.00123489	0.0321477			CTNND1	-1.04758	2.72729e-06	5.21325e-05			GNAS	0.834061	1.28074e-05	0.000596644
IFI44	1.29761	0.00119124	0.0314421			CEBPA	-1.04267	0.000323758	0.00323484			LUC7L2	0.836298	0.00123868	0.0217168
SETD1B	1.31253	5.84626e-05	0.0031926			EMC2	-1.0422	0.00408795	0.0247			ZNF687	0.837614	0.00196572	0.0304282
PLEKHO1	1.3242	0.00195651	0.0437429			SCRN1	-1.04106	0.00706743	0.0378021			DDX3X	0.843118	0.00105269	0.0189355
ACACB	1.3253	0.00131778	0.0335655			ING4	-1.04034	9.32134e-05	0.00113658			GTPBP1	0.843241	0.00237954	0.0352706
ZFAND2A	1.32575	0.000313496	0.0118679			MSRB1	-1.03956	0.00621885	0.0342567			TCAF2	0.844606	0.00194241	0.0301629
SKIL	1.32965	0.00135533	0.0340696			ANAPC7	-1.03894	0.00259393	0.01726			RAB11FIP1	0.848433	0.00187168	0.0292585
RAPGEF2	1.34354	0.00176559	0.0406714			MRPS34	-1.03864	6.94601e-05	0.000892978			DDX39A	0.849267	3.28428e-05	0.00130519
TENT4B	1.3539	4.64514e-05	0.00272457			TEP1	-1.03409	0.00375318	0.0230751			PLCXD1	0.850165	0.0020037	0.0308848
HMGB2	1.35447	2.52155e-09	5.98994e-07			SLC25A20	-1.03341	0.000316457	0.00317868			VPS37B	0.857111	0.00346808	0.0452981
MXD4	1.35953	0.000693056	0.0215915			PIGF	-1.03193	0.00389052	0.0237805			CMPK2	0.860164	0.00129704	0.0224186
SRGN	1.3597	8.75349e-09	1.7697e-06			CD1D	-1.03183	1.22152e-06	2.54367e-05			SIN3A	0.863222	0.000871064	0.0165148
BEST1	1.36178	0.00017062	0.00775254			METTL17	-1.03135	6.70214e-10	2.94956e-08			IGLV3-10	0.864962	0.000974515	0.0178533
CHD1	1.36495	0.000374545	0.013532			PRKD3	-1.0308	0.00273501	0.0178892			ILF2	0.866295	0.000291671	0.00689231
LMBR1L	1.36686	6.85029e-05	0.00359622			INTS1	-1.029	0.00225845	0.0155301			NOP58	0.869712	0.00012221	0.00359035
VPS37B	1.37007	2.503e-05	0.0016749			KCNE3	-1.02869	3.78188e-05	0.000536494			MTMR1	0.872119	0.00247496	0.0360306
ITPRIP	1.37322	0.000135203	0.00635987			INTS8	-1.02772	0.00232896	0.0158994			HGSNAT	0.874849	0.000419142	0.00912291
BTG3	1.37814	0.00103629	0.0288762			CLNS1A	-1.02635	7.01675e-05	0.000900848			ICA1L	0.876748	0.00136035	0.0231047
PTS	1.38218	0.00137866	0.0342933			INTS9	-1.02494	0.000431437	0.00411518			BUD31	0.877436	7.83923e-05	0.00260854
KRR1	1.38484	1.16193e-05	0.000935652			TTC13	-1.02466	0.00757026	0.0395676			CDC27	0.880309	0.00368315	0.0473486
SIK1B	1.38722	0.000577456	0.0188911			FBXL15	-1.02438	0.00254928	0.0170348			KRR1	0.885642	8.7774e-05	0.00276107
SKI	1.38881	0.00215135	0.0468856			STX7	-1.02335	2.92924e-06	5.54329e-05			YJU2	0.887219	0.00129988	0.0224281
IL4R	1.3938	1.09854e-06	0.00013213			RAB3D	-1.02305	1.98209e-06	3.97354e-05			ELK4	0.887362	0.00267077	0.0378121
IRS2	1.39852	5.08855e-05	0.00293039			VAPB	-1.02159	0.00344892	0.0215344			ALG13	0.887758	0.0029452	0.0404107
ZFP36L2	1.4045	2.259e-08	4.1279e-06			ADH5	-1.02156	0.00128193	0.00993193			LYN	0.892986	8.46204e-06	0.000449325
PIGA	1.40459	9.58598e-06	0.000835651			TCHP	-1.02114	0.000316064	0.0031781			CAPN2	0.897923	0.00164126	0.0266276
NFKBIZ	1.41191	0.000156366	0.00724776			MARCHF5	-1.01949	0.00357266	0.0221814			KIF21B	0.898239	0.00187221	0.0292585
SERTAD1	1.41364	0.000480703	0.0167928			PGM2	-1.01936	0.000912686	0.00758861			IDI1	0.900774	0.000135386	0.00390704
TMEM52B	1.41744	0.00218644	0.0474329			MNDA	-1.01786	0.00368698	0.022742			APH1A	0.902906	0.000610742	0.0124737
SLC16A3	1.42126	0.000322191	0.0121486			ADSS2	-1.01645	0.000612095	0.0055106			ISG20	0.914146	0.000474286	0.00999987
TP53BP2	1.42462	2.18728e-05	0.00153197			PSMB5	-1.01602	0.000697104	0.00609612			TRAM2	0.917561	0.00373389	0.047875
MCM6	1.42741	2.4478e-05	0.00166136			TMEM185B	-1.01576	0.00350173	0.021827			ZBTB5	0.917772	0.0026609	0.0377269
DUSP5	1.43387	0.0015209	0.0369606			PSMG3	-1.01476	1.77334e-05	0.000275975			RIC1	0.921197	0.00287408	0.0401673
DCTN6	1.4392	3.02075e-05	0.00191354			STX6	-1.0136	0.00114874	0.00906535			NBPF12	0.924394	0.00130732	0.0225045
ZNF394	1.43921	1.19281e-10	4.72255e-08			LYST	-1.01334	7.86598e-05	0.000988418			PTPN1	0.930736	1.43629e-06	0.000108086
FURIN	1.45128	0.000240005	0.00991533			RETSAT	-1.01326	0.00227638	0.0156194			SAR1B	0.931166	0.000197284	0.0052493
FHIP2A	1.45303	0.00080833	0.0239276			HARS2	-1.01267	0.000615963	0.00551394			NR1H2	0.935056	0.00186071	0.0291719
DNAJB1	1.45686	3.3808e-08	5.94896e-06			KLHDC3	-1.00984	0.0094888	0.0468841			EIF4A1	0.939428	3.8467e-06	0.000242789
IDI1	1.48745	3.48246e-06	0.00035581			RANGRF	-1.00879	0.00148773	0.0111807			EIF5	0.94289	4.31967e-06	0.000269168
LYPD3	1.49096	0.000796288	0.0237973			MICAL2	-1.00861	0.00259175	0.01726			MTPAP	0.945692	0.00026842	0.00653238
PTP4A1	1.49566	3.43747e-09	7.77687e-07			RCSD1	-1.00633	0.00159906	0.0117654			NSD1	0.946231	0.00173632	0.027801
SGK1	1.50758	4.07796e-05	0.00247688			BTN3A3	-1.00524	5.06222e-05	0.000675582			CALR	0.946523	9.57873e-05	0.00294681
BHLHE40	1.51162	0.000123722	0.00600407			AKR7A2	-1.00495	0.000397409	0.00384487			SEC61B	0.951027	0.00105294	0.0189355
EIF2AK2	1.52768	4.57649e-05	0.00271369			WRAP73	-1.00454	0.00137479	0.0105233			PI4K2A	0.953334	0.00375664	0.0480408
TUBB2A	1.5382	0.000390619	0.0140063			CHMP4A	-1.00211	0.000142907	0.00162718			MAN2A1	0.957111	0.00328563	0.0437324
SLC16A6	1.55521	0.000582526	0.0188913			SPSB2	-1.00077	0.00320151	0.0203034			EZR	0.957493	0.00103871	0.0187485
RBM38	1.55886	0.000109411	0.00547168			USP1	-1.0005	0.0101091	0.0491279			UBE2H	0.959709	0.00126946	0.0221374
TRAF3	1.56637	1.58416e-05	0.00120509			ATG16L2	-0.999201	0.000593404	0.00536787			SEC14L1	0.959888	7.41596e-06	0.00040083
SELENOK	1.57472	3.06765e-07	4.10546e-05			MGAT2	-0.99833	0.00205083	0.0143835			HNRNPL	0.961245	0.000209824	0.00545933
METRNL	1.57982	0.000218444	0.00922513			POLB	-0.997619	0.00214997	0.0149581			CNOT1	0.968887	0.000427108	0.00926474
DUS3L	1.58297	0.000487163	0.0168942			POMK	-0.997299	0.000189379	0.00206203			EMP3	0.970227	0.000644378	0.0131059
PDE4B	1.58624	6.55498e-06	0.000616687			USO1	-0.996931	0.00101226	0.00826314			MANBA	0.97065	1.19972e-05	0.000566997
ZNF326	1.59082	3.30826e-05	0.0020681			CAMK2G	-0.996832	0.000826097	0.00696661			TLE1	0.970968	0.00342583	0.0449261
BTG2	1.5993	1.60309e-08	3.10868e-06			TRIP11	-0.995563	0.000700726	0.00611649			EMD	0.971367	0.00094112	0.0174705
NFKBIA	1.60416	1.99285e-08	3.71295e-06			NUAK2	-0.994562	0.000399389	0.0038573			SNX11	0.972744	0.00157404	0.0259239
HIF1A	1.61309	3.69082e-09	8.15585e-07			GALNT7	-0.994419	0.0083798	0.0427311			SNN	0.972906	0.00012531	0.00365942
BCL3	1.6266	0.00160456	0.038236			TMEM101	-0.994388	0.00221734	0.0153142			NPIPA9	0.972914	7.61367e-06	0.000409256
AFAP1	1.63876	0.000166542	0.00760808			WASF2	-0.991592	0.000242643	0.00255383			TRAF3	0.973084	0.000116732	0.00347108
MX1	1.64058	2.08799e-05	0.00149173			JMJD8	-0.991473	0.000800475	0.00681026			RBM8A	0.976218	0.000204295	0.00532964
PDE4D	1.64181	1.36171e-05	0.00106934			PWP1	-0.990623	0.000233632	0.00246447			RLF	0.977749	0.000540604	0.0112526
JUNB	1.65867	5.57868e-06	0.000530086			COG2	-0.987364	0.0044148	0.0261243			CLDND1	0.979262	0.0002113	0.00546864
OASL	1.66237	4.39497e-05	0.00262648			TPCN1	-0.987254	0.000150325	0.00169937			RUBCN	0.979658	0.00132496	0.0226214
GSPT1	1.66533	2.82754e-09	6.55299e-07			ARL14EP	-0.985337	0.00217901	0.0151046			EIF1B	0.990281	4.94231e-05	0.00179742
CEP290	1.68995	2.66e-05	0.00174312			COQ2	-0.984137	0.00749423	0.0393271			ZFAND5	0.992206	0.00184437	0.0290089
OSM	1.69713	0.000173043	0.00775254			VIPAS39	-0.983278	0.0102325	0.0495496			IRF4	0.995109	0.000230314	0.00589833
AVPI1	1.70268	0.000615409	0.019689			ZNF146	-0.983152	0.000456562	0.00429849			FAM53C	0.995908	0.000142959	0.00410138
HSH2D	1.70277	1.87251e-07	2.61655e-05			RPS19BP1	-0.981481	0.000121473	0.00143135			LY6E	0.997843	0.00066849	0.0134288
JMJD6	1.71248	1.44786e-06	0.000171969			PCYOX1L	-0.980455	0.00359436	0.0223015			VOPP1	1.00163	0.000170644	0.00472922
USP36	1.71457	2.0517e-09	5.57006e-07			PVR	-0.979769	0.00122311	0.00957241			HSH2D	1.00681	1.37404e-06	0.000104203
PFKFB3	1.71919	7.11904e-06	0.000650433			BATF	-0.979298	0.00751497	0.0393738			MAPRE1	1.00798	8.9107e-05	0.00279402
ZFP36	1.72297	7.19351e-07	9.1137e-05			EIF4B	-0.977042	0.000835852	0.00703633			EPC1	1.01172	8.24998e-05	0.0026725
PLK3	1.7463	3.83054e-06	0.000375235			KAT2A	-0.975093	0.00671538	0.036373			TAOK1	1.01493	0.00291665	0.0403587
KLF11	1.75408	0.000254553	0.0102057			VAV1	-0.974775	3.64905e-08	1.11379e-06			FMNL1	1.02181	0.000269094	0.00653238
PPP1R16B	1.75511	3.52729e-07	4.65504e-05			CSE1L	-0.974299	0.000129929	0.00151589			RFTN1	1.02532	0.000186571	0.00507007
CDKN1A	1.78466	9.71345e-05	0.00501615			UGP2	-0.973791	0.000297588	0.00302771			LGALS3BP	1.02641	0.00188835	0.0294322
SC5D	1.79885	4.05357e-06	0.000393031			PISD	-0.97363	8.64223e-07	1.86271e-05			ESYT2	1.03047	0.000806876	0.0155694
ARID5A	1.80008	1.78982e-07	2.53834e-05			COPS7A	-0.972821	6.39247e-05	0.000835436			PYROXD1	1.03185	0.000983651	0.017987
OSER1	1.80372	5.97116e-11	2.579e-08			CDK2AP2	-0.972636	8.33097e-05	0.00103043			TAGAP	1.03388	1.04282e-06	8.06752e-05
SEC14L2	1.81328	1.63617e-06	0.000189597			LTA4H	-0.970535	0.00873141	0.0441092			RELT	1.03391	0.000493728	0.0103678
ENC1	1.81938	6.68985e-05	0.00355123			DHPS	-0.970534	0.00160476	0.0117981			PIK3IP1	1.03424	0.00333734	0.0441205
DDIT3	1.82104	1.64584e-07	2.36951e-05			SYTL1	-0.970407	0.000551385	0.00505543			CREBRF	1.03858	0.00101708	0.0184603
YPEL5	1.83196	2.10906e-11	1.05475e-08			ZMPSTE24	-0.970333	0.00243333	0.0164107			AP3D1	1.03859	0.000235426	0.00598226
RGS2	1.8342	3.32549e-08	5.94896e-06			EIF4EBP3	-0.970092	0.00934245	0.0464765			SHCBP1	1.03969	0.00132386	0.0226214
CEMIP2	1.84905	2.12871e-10	7.49147e-08			MGA	-0.96877	0.000194017	0.00209565			NXT1	1.04469	0.00070542	0.0139982
DUSP4	1.85622	4.21012e-05	0.00253194			COQ9	-0.967516	0.000473292	0.00442956			DERL1	1.04641	9.61794e-06	0.000485012
DUSP10	1.8713	2.7434e-06	0.000293824			KDM2B	-0.966165	0.000413204	0.00397735			REL	1.04674	1.73141e-09	3.13674e-07
MTFP1	1.90387	2.33362e-09	5.83528e-07			LARS1	-0.965313	0.00430481	0.0256445			SAMD8	1.04946	3.15947e-05	0.00127723
KLF10	1.91062	3.03023e-06	0.000319925			LRPPRC	-0.965148	0.000868534	0.00727907			HARBI1	1.04973	0.00261505	0.0372931
CNOT6L	1.91326	2.30298e-09	5.83528e-07			RNF44	-0.963854	1.56842e-05	0.000246928			ING3	1.05328	0.000109349	0.00329158
JOSD1	1.93161	8.55542e-14	8.12936e-11			IMMT	-0.96188	3.11495e-06	5.87124e-05			STX17	1.05664	0.000199695	0.00526581
PPM1A	1.95369	1.32715e-09	3.8214e-07			ALKBH3	-0.961051	0.00301826	0.0194277			TSPYL2	1.06074	0.000711345	0.0140872
GADD45B	1.97539	1.01763e-05	0.000863352			NPRL2	-0.958589	0.000397315	0.00384487			ZFP36	1.06345	1.20296e-09	2.35372e-07
PIM3	2.00087	7.38831e-06	0.000666415			GDE1	-0.958307	0.000307566	0.00310689			DDX47	1.06356	1.66744e-06	0.000119945
PIK3R1	2.00427	1.69122e-08	3.214e-06			TMEM39B	-0.957696	0.00235995	0.0160679			RNF43	1.06512	0.0014431	0.0241271
RELB	2.03805	9.75057e-06	0.000842272			PRRC1	-0.957669	0.00149848	0.0112084			IRF1	1.0679	9.78513e-05	0.00300087
SLC2A3	2.11026	4.65558e-13	3.32117e-10			PPP5C	-0.95695	0.00942823	0.0467599			NUP153	1.06818	0.000384371	0.00854613
CSRNP1	2.12064	1.35169e-07	2.03868e-05			FN3KRP	-0.955876	0.00183127	0.0131269			LLPH	1.07097	0.0034227	0.0449261
DDIT4	2.12626	1.86642e-13	1.4779e-10			CYBRD1	-0.954783	0.00260359	0.0172878			LRRC59	1.07425	0.00329417	0.0437865
CENPP	2.15218	1.62409e-07	2.36951e-05			PRUNE1	-0.954209	0.00137292	0.0105186			NFE2L2	1.0762	8.35434e-05	0.00269553
SLC7A5	2.17651	1.09463e-07	1.6776e-05			SLC9A9	-0.95416	0.00542768	0.0307185			MAPK1IP1L	1.07769	7.7691e-07	6.38698e-05
PER1	2.18189	1.08919e-09	3.23421e-07			ENGASE	-0.954021	3.82843e-05	0.000541474			CCDC59	1.07832	0.000600384	0.0123135
ARRDC2	2.21599	2.05746e-10	7.49147e-08			TIRAP	-0.952631	0.00318109	0.020201			FBRS	1.07835	0.00142133	0.0238129
AREG	2.25515	2.75209e-06	0.000293824			ATP2B4	-0.952559	0.0011143	0.00886756			GNA13	1.07852	6.53828e-05	0.00226021
DUSP2	2.2588	5.95104e-09	1.25659e-06			RIPK3	-0.951801	0.000375154	0.00367084			ZDHHC18	1.07915	0.00163709	0.0266041
GABARAPL1	2.25931	6.20364e-10	1.90152e-07			ARL11	-0.949888	1.04354e-05	0.000171424			NFKBIB	1.08008	0.00118289	0.0208884
SOCS3	2.26747	8.36657e-08	1.34744e-05			SWI5	-0.949345	0.0056335	0.0315223			TENT4A	1.08191	0.000650079	0.0131944
NR4A3	2.28688	3.95529e-05	0.00242472			C5orf51	-0.94877	0.000825921	0.00696661			ATF7IP	1.08344	7.616e-08	8.18762e-06
CD69	2.29427	2.16907e-15	4.1221e-12			HSD17B4	-0.948649	0.000695496	0.00608768			LY9	1.08374	1.7991e-06	0.000126623
CXCR4	2.34326	7.87596e-15	1.12253e-11			CHCHD1	-0.94721	0.0010829	0.00866136			ZNF326	1.08494	0.00158408	0.0260017
CREM	2.42092	7.47061e-11	3.08634e-08			HDAC5	-0.947201	0.00288448	0.018681			TICAM1	1.08882	0.000761141	0.0148925
ZNF331	2.48663	9.45094e-15	1.12253e-11			EIF2S2	-0.946826	2.11635e-06	4.17186e-05			ATF4	1.08976	9.87165e-07	7.72595e-05
TENT5C	2.58282	1.21599e-15	3.84369e-12			FLI1	-0.946473	2.4748e-05	0.000370545			ECE1	1.09139	3.37998e-06	0.00021612
TNFAIP3	2.62764	1.61806e-15	3.84369e-12			AP3M1	-0.946265	3.23955e-05	0.000467266			ANKRD11	1.09303	8.72693e-07	6.998e-05
CD83	2.64546	2.12673e-09	5.61339e-07			TRAPPC4	-0.945192	0.000384297	0.0037349			USP11	1.09538	4.71257e-05	0.0017332
NR4A2	2.68022	2.307e-12	1.37007e-09			CASP10	-0.944585	6.82882e-05	0.000881505			DDX60	1.10031	0.00390857	0.0497237
RGS1	2.76145	3.31914e-12	1.78901e-09			MRPL18	-0.942039	0.00100056	0.00819678			ELF1	1.10063	1.18378e-05	0.000562181
SMAD7	2.80734	4.76936e-09	1.02996e-06			GPAA1	-0.941273	0.000210599	0.00224655			MRM3	1.1016	0.00233579	0.0347809
FOSL2	2.89548	7.08074e-17	3.36406e-13			KYAT3	-0.941128	0.00499841	0.0288998			ZBTB32	1.10288	0.00155047	0.0257526
						RSAD1	-0.940009	0.00947015	0.0468409			SC5D	1.10445	0.0031468	0.0424623
						HDHD5	-0.939724	0.00125813	0.00978177			IL10RA	1.10552	8.54283e-06	0.000449325
						EHMT2	-0.937161	0.00760113	0.0396701			BRI3	1.1119	0.0039152	0.0497434
						MARF1	-0.936068	4.69994e-05	0.000637625			SMCHD1	1.11193	0.000298169	0.0070289
						MRS2	-0.935984	0.00960255	0.0473354			SLC5A6	1.11205	0.000268837	0.00653238
						H4C3	-0.935863	0.00184037	0.0131622			ICOSLG	1.11358	0.000186559	0.00507007
						IL17RA	-0.934451	6.82174e-08	1.95598e-06			ZNF10	1.1154	0.00239818	0.0353334
						CRTAP	-0.934226	0.000892741	0.00745553			BCL7B	1.11672	0.0017836	0.0283723
						ALDH3A2	-0.931313	0.00156334	0.0116109			ZPR1	1.11733	5.803e-06	0.000330063
						TRAPPC6A	-0.930993	0.0026487	0.0174892			KBTBD2	1.1191	0.000278338	0.00668104
						TRIM5	-0.930766	0.000932159	0.00772337			RBBP6	1.12381	0.00158209	0.0260017
						SIRPB2	-0.930505	0.000365059	0.00358319			CYTIP	1.12431	6.65975e-06	0.000370184
						CWF19L2	-0.929736	0.0103307	0.0498976			KLHL24	1.1279	7.42134e-05	0.00250355
						DTD1	-0.928961	0.000680478	0.00598947			TXNDC11	1.13015	0.00181726	0.0287674
						TARS1	-0.928286	0.0058522	0.0325726			WHAMM	1.13283	1.45861e-06	0.000108928
						KIAA0513	-0.927799	1.37026e-05	0.000220125			CCNL1	1.13285	6.3898e-08	7.18522e-06
						SNX11	-0.927765	8.28883e-05	0.00102656			MGAT4A	1.13335	0.00255424	0.0367841
						RCN3	-0.927176	0.00132792	0.0102236			RAB1A	1.1347	2.85732e-05	0.00117946
						PUSL1	-0.926799	0.00559668	0.0313533			MX1	1.13531	0.000696518	0.0139062
						PIAS3	-0.921151	0.000270139	0.00279656			TMEM123	1.13669	5.55988e-07	4.81348e-05
						ALDH9A1	-0.919791	0.0024793	0.0166299			EDRF1	1.13837	0.000447055	0.00961217
						GALT	-0.917379	0.000304119	0.00307762			BCAS2	1.13869	3.9323e-05	0.00149688
						TBC1D2B	-0.915031	2.32571e-05	0.000353517			TLE4	1.14012	0.00317034	0.0426036
						HIF1AN	-0.914372	0.00591508	0.0328646			ATF7IP2	1.1416	0.00028064	0.00670453
						CITED2	-0.91394	0.00308038	0.0196936			DIABLO	1.14184	2.36165e-05	0.00098337
						SLX4IP	-0.910502	0.00673909	0.0364165			HCST	1.143	0.0033212	0.0439665
						VDAC3	-0.909823	0.00188006	0.0134359			SLC25A33	1.14462	0.00163296	0.0266041
						PINK1	-0.908811	0.00408249	0.0246925			PABPC4	1.14716	0.000392017	0.00867671
						SHMT2	-0.907945	0.000355189	0.00349355			ZNF766	1.14749	6.49259e-06	0.000362954
						RGS19	-0.905812	0.000265529	0.00275487			SLC20A1	1.14787	0.000243622	0.00614266
						ERMAP	-0.905761	0.00327951	0.0207286			EIF1	1.1511	1.64077e-07	1.54343e-05
						ESD	-0.904983	0.000110794	0.00132366			EIF5A	1.15702	6.83591e-05	0.00234652
						ZNF32	-0.904705	0.00505229	0.0291137			HAUS2	1.15787	0.00130891	0.0225045
						DYNC1LI1	-0.902831	0.00108208	0.00866136			DCP1A	1.16108	3.48003e-05	0.0013618
						TIMM22	-0.902791	0.00724147	0.0384074			SLC38A5	1.16531	0.00304469	0.0412765
						CRELD1	-0.902391	0.00965782	0.0475207			ZBP1	1.16876	0.000221002	0.00568963
						SLC6A12	-0.901808	0.00763333	0.0397505			TGIF2	1.16997	8.53053e-06	0.000449325
						ADPRS	-0.900092	0.000218202	0.00231353			HNRNPA3	1.17109	6.73901e-07	5.68343e-05
						RPRD1A	-0.898638	0.00766662	0.039858			H3-3B	1.17161	1.77347e-06	0.000125724
						ITGA4	-0.897793	6.74567e-05	0.000875549			MIOS	1.17785	0.00341289	0.0449261
						NCOA4	-0.896651	0.000816636	0.00690941			GTF3C4	1.1829	0.00259719	0.0370989
						LRRC8D	-0.894384	0.00866084	0.0438229			MYC	1.18448	0.00286411	0.0400853
						PIGC	-0.893678	0.0048262	0.0281282			OPTN	1.18541	7.00924e-05	0.00238228
						MRPS9	-0.893482	0.0068449	0.036925			MYO1C	1.18871	0.0024801	0.0360517
						LNPEP	-0.892588	0.000106672	0.0012825			CASP9	1.18979	2.2995e-05	0.000965493
						DPEP2	-0.89219	7.66874e-05	0.000970076			PFKFB3	1.19976	0.00324881	0.0434195
						USP48	-0.891749	0.00553071	0.0311498			SMURF1	1.2011	0.0019194	0.029853
						DDX23	-0.891527	0.000602361	0.00543331			CCDC57	1.20225	0.00363698	0.0471265
						C7orf50	-0.891271	0.00734939	0.0388491			SMAP2	1.20241	1.30029e-06	9.93805e-05
						HDAC7	-0.890484	0.00540204	0.0306072			HNRNPUL1	1.20354	3.14416e-05	0.00127632
						ARHGEF10L	-0.890394	1.73045e-07	4.47363e-06			CEMIP2	1.21088	8.40847e-05	0.00269574
						RPA1	-0.89002	0.00521124	0.0298118			NECAP1	1.2128	0.000226057	0.00580451
						DDX17	-0.888277	5.98886e-10	2.6604e-08			EMILIN2	1.21846	0.000908837	0.0170003
						MSL3	-0.886464	0.00050488	0.00470195			HSPA5	1.21989	0.000328152	0.00762152
						ATP5F1A	-0.885726	0.000796895	0.00679682			XPO5	1.22093	0.000103838	0.00315482
						CUTC	-0.884519	0.00245576	0.016534			SIL1	1.22113	0.00196448	0.0304282
						GLE1	-0.884368	0.000598141	0.00540039			ARPP19	1.22373	0.000108671	0.00328127
						GRAMD1A	-0.88424	0.00180494	0.0129535			POLR1F	1.22675	1.02707e-05	0.00051004
						WLS	-0.882517	0.00974336	0.0478806			KIAA1109	1.23374	0.00101435	0.0184449
						RNF2	-0.882218	0.00288926	0.0186992			USP36	1.23707	1.51576e-05	0.000686511
						SPDYE8	-0.881392	0.00839598	0.0427685			ANKRD28	1.24137	0.00313009	0.0422951
						P2RY8	-0.881254	0.000133689	0.00154642			LAP3	1.24303	4.88821e-06	0.000289827
						CORO1B	-0.880358	0.00315907	0.0201017			ARRDC2	1.24494	4.74344e-05	0.00173802
						NECAP2	-0.878815	0.00025719	0.00267715			AMZ1	1.24507	0.003573	0.0464823
						SLC35E2B	-0.877279	9.29582e-05	0.00113493			DBF4	1.24561	8.48703e-05	0.00269574
						YPEL2	-0.87572	0.00478074	0.0279853			SPATA2	1.24675	0.00225518	0.0338901
						IRF4	-0.875582	0.0082648	0.0422711			ARIH1	1.25067	0.00284832	0.0399214
						SAFB	-0.875322	0.00259316	0.01726			KCMF1	1.25142	0.00136355	0.0231093
						PPM1G	-0.87438	0.000333181	0.00330951			PRDX4	1.25407	0.00129073	0.0223807
						MSL1	-0.873265	0.00176599	0.0127167			TFRC	1.26456	2.9033e-06	0.000191912
						SP1	-0.871446	8.60104e-06	0.000145152			BTG1	1.26713	8.65893e-06	0.000450587
						NFAM1	-0.870966	0.000685064	0.00602424			ADGRE5	1.26814	2.74706e-08	3.42381e-06
						CBR1	-0.870849	0.00497058	0.0288361			NFKBIZ	1.26849	0.000534451	0.0111483
						TRAPPC6B	-0.867647	0.00761679	0.0397056			SAT1	1.27235	9.11215e-08	9.5854e-06
						OSGEP	-0.866574	0.00129499	0.00999775			BACH1	1.27933	0.00086106	0.0163886
						CSTF2T	-0.866168	0.0100895	0.0491083			MYO1D	1.28029	0.0031577	0.0425506
						ARRDC1	-0.865827	0.000193476	0.00209565			MTHFD2	1.28054	0.000280983	0.00670453
						DUS2	-0.864178	0.000320802	0.00321209			CEBPG	1.28146	7.0375e-05	0.00238228
						CCNB1IP1	-0.863167	0.00990325	0.0483512			SUOX	1.28406	0.00146453	0.024408
						NOB1	-0.862748	0.00307205	0.0196536			PDIA4	1.28575	0.000429441	0.00929475
						CYP27A1	-0.862735	0.00667688	0.0362667			ZNF394	1.28869	6.33414e-06	0.000356131
						RPL5	-0.861417	0.00100155	0.00819777			PLK3	1.29409	0.00385426	0.0490966
						BST1	-0.859896	0.00225684	0.0155301			CLEC2B	1.29449	0.00070354	0.0139893
						CAT	-0.85913	0.00429547	0.0256104			DENND4A	1.30177	1.22404e-10	3.07045e-08
						ZNF518A	-0.858626	0.00687648	0.0370642			MYDGF	1.31399	0.000821457	0.0158195
						TRIM13	-0.855641	1.31002e-06	2.70642e-05			REC8	1.31456	5.09597e-05	0.00183963
						CFAP298	-0.854572	0.000294194	0.00299964			PPRC1	1.31634	4.89337e-05	0.00178626
						CD33	-0.853831	0.000144638	0.00164293			ZC3H7A	1.32201	7.35655e-06	0.000399829
						OGFRL1	-0.853254	1.07483e-09	4.58109e-08			JCHAIN	1.32227	0.00347747	0.0453534
						MCMBP	-0.85188	0.0050191	0.0289755			SEC11C	1.32316	8.06282e-05	0.00264448
						SARS1	-0.8514	0.000144411	0.00164232			DOCK9	1.3269	0.00343807	0.0449661
						RNF34	-0.851363	0.00191742	0.0136411			S1PR2	1.32738	3.99177e-05	0.00150778
						FTSJ3	-0.849976	0.00217659	0.0150989			TXNDC5	1.33121	0.00326926	0.0436194
						CARHSP1	-0.849516	0.00572644	0.0319102			TBC1D25	1.33246	0.000132035	0.00382158
						DDB1	-0.847487	4.05097e-05	0.000568698			DUS3L	1.33349	0.000339565	0.00776432
						DTWD1	-0.847045	0.0098282	0.0481836			TSPOAP1	1.33415	0.00341695	0.0449261
						RMND5A	-0.841677	0.000688207	0.00603797			SLC35A2	1.33553	0.000201778	0.00530643
						VPS26B	-0.841501	0.00166714	0.0121156			PRDM2	1.33577	4.65123e-10	9.47979e-08
						PREB	-0.841116	0.0076812	0.0399119			CYCS	1.339	1.07726e-05	0.000524318
						CCT8	-0.84075	0.00161133	0.0118281			TGIF1	1.3397	0.000383366	0.00854321
						DUSP22	-0.839	0.0100355	0.048896			HEG1	1.33986	0.00108275	0.0194002
						RETREG3	-0.83861	0.000255144	0.00266465			FAS	1.34156	0.00348159	0.0453534
						MXI1	-0.837446	0.00867564	0.0438743			SH2B3	1.34181	1.74994e-06	0.000124961
						PRMT7	-0.836006	0.00796812	0.0411541			FFAR1	1.34193	0.000922843	0.0171965
						SIN3B	-0.835815	0.000712074	0.006187			CTRC	1.34283	0.00127384	0.0221743
						SUGT1	-0.835439	4.49581e-05	0.000617407			MAN1A1	1.35335	0.00366146	0.0472593
						EEF1B2	-0.834702	0.000135256	0.00155692			SEC61A2	1.35594	0.000577456	0.0119688
						KLF2	-0.833479	0.0074072	0.0390239			PPP1R15B	1.35976	4.57625e-09	7.71888e-07
						ATRX	-0.832946	0.00501227	0.0289537			UBALD2	1.36402	0.00366566	0.0472593
						ARAP3	-0.832544	0.00516003	0.0296084			SMIM17	1.36737	0.00214999	0.0327622
						ARFRP1	-0.831496	0.00236013	0.0160679			SELENOK	1.36779	3.19501e-06	0.000206999
						FAM217B	-0.831476	0.000661404	0.00586523			RBBP8	1.37145	0.000960961	0.0177045
						RBL2	-0.831122	0.00239	0.0162109			CCNT1	1.372	0.000210674	0.00546691
						LRRK2	-0.830566	0.00215507	0.0149826			PTP4A1	1.37988	1.18781e-07	1.19798e-05
						PRKCD	-0.830274	1.8918e-07	4.851e-06			OSGIN2	1.38087	0.00292436	0.0404082
						SLC35A5	-0.826163	0.00671566	0.036373			ORC6	1.38185	9.54437e-05	0.00294551
						GIMAP2	-0.825451	0.0042433	0.0254265			HSPA13	1.38338	0.000328087	0.00762152
						YPEL3	-0.824749	0.00353174	0.0219851			CENPP	1.38506	0.00208247	0.0318824
						RNF166	-0.822698	0.00101829	0.00829182			ETF1	1.38531	1.94749e-06	0.000135123
						NT5C	-0.8219	0.00423541	0.0253963			CD38	1.3905	0.000157909	0.00445195
						MRPL49	-0.816356	0.00788547	0.0407718			ERN1	1.39383	0.00142012	0.0238129
						PPM1D	-0.816287	0.0015652	0.0116152			OVCA2	1.39772	0.00331726	0.0439665
						PIK3CD	-0.815654	0.000124553	0.0014648			PIGA	1.39788	7.72633e-05	0.00257975
						TFCP2	-0.815565	0.00198688	0.0140088			RNF207	1.39879	0.0011882	0.0209445
						ZNF185	-0.815379	0.00161773	0.0118659			MKNK2	1.40091	0.00263618	0.0375392
						PTGS1	-0.814769	3.77431e-05	0.000536224			IFRD1	1.40611	2.77999e-08	3.42381e-06
						EIF4EBP1	-0.814493	0.00141845	0.0107457			PPIF	1.40634	1.47703e-05	0.000675222
						CREBRF	-0.813752	0.00553893	0.0311607			HIPK2	1.40829	4.5255e-05	0.00168981
						ARHGAP9	-0.811604	0.000477758	0.00446695			RASGEF1B	1.40901	3.46287e-10	7.69938e-08
						EMG1	-0.811586	0.00508935	0.0292916			TOE1	1.40942	4.98909e-06	0.000291927
						SLC66A3	-0.810879	0.00437842	0.0259415			ARID5A	1.41028	0.000156805	0.00443973
						AGPAT2	-0.809797	0.00458065	0.0269822			HYOU1	1.41058	2.36218e-05	0.00098337
						DHRS4	-0.80975	0.00468549	0.0274855			PRDM4	1.41345	5.01316e-06	0.000291927
						PDK3	-0.807976	0.000180127	0.00197955			NFKB1	1.41698	1.07344e-05	0.000524318
						MRPS11	-0.807172	0.00209477	0.0146387			RIPK2	1.41993	4.78455e-06	0.00028541
						RPS6KA1	-0.804995	8.25652e-05	0.00102524			CDK5R1	1.42036	0.00131671	0.0225989
						MAP3K7	-0.803588	0.00384446	0.0235598			CACNA1F	1.42081	0.00168264	0.0272087
						CCNDBP1	-0.803151	0.000555362	0.00508696			SEC24A	1.42276	0.000454308	0.00967592
						CASP1	-0.802949	0.000232984	0.00246037			AFAP1L1	1.42421	0.00308832	0.0417885
						TARBP2	-0.802521	0.00727674	0.0385729			SLC35B1	1.42666	0.000111661	0.0033385
						MAP3K3	-0.802502	6.78937e-05	0.000877609			CDK16	1.42703	1.90231e-05	0.000823464
						PSKH1	-0.801876	0.00975375	0.0478931			IGF1	1.42851	0.00144521	0.0241271
						TMEM69	-0.800316	0.00780874	0.0404192			RAD18	1.43153	0.000325046	0.00758931
						CDC16	-0.798555	0.00825649	0.0422514			HMGB2	1.43949	3.22073e-06	0.000207292
						CLK2	-0.798252	0.00538799	0.0305459			PIM2	1.43989	3.46597e-11	9.41877e-09
						ARRB1	-0.798082	0.00125107	0.00973486			GLDC	1.4409	0.00219903	0.0332093
						XPO1	-0.797502	0.00121332	0.00951156			KLF6	1.4447	7.96973e-07	6.49732e-05
						S1PR4	-0.79477	0.0056225	0.0314793			N4BP3	1.44745	0.00233295	0.0347809
						BTF3L4	-0.792671	0.00552001	0.031108			BUB1	1.45764	0.00245874	0.0359013
						PHYKPL	-0.791953	0.00806659	0.0415267			CCDC86	1.45901	3.28115e-05	0.00130519
						TMEM214	-0.791694	0.00399862	0.0242999			SNED1	1.46022	0.000387049	0.00858616
						TRMU	-0.791615	0.00548772	0.0309814			BTG3	1.47713	0.000493857	0.0103678
						SGF29	-0.79144	0.00399411	0.0242999			THEMIS2	1.48319	6.41809e-05	0.00222653
						OAZ2	-0.790447	0.00330236	0.0208271			CD70	1.48432	0.00136534	0.0231093
						RPS3A	-0.789772	0.00173858	0.0125576			EIF2AK3	1.48515	4.68655e-07	4.09362e-05
						ARHGAP27	-0.789584	3.29289e-07	7.88792e-06			RIPOR3	1.48692	3.71402e-05	0.00143614
						TRAF7	-0.789529	0.00102816	0.00833625			DNAJB14	1.48973	2.54909e-10	5.93757e-08
						LAS1L	-0.787775	0.00491405	0.0285607			HIC2	1.48996	0.00209921	0.0320885
						TIA1	-0.787262	0.00910936	0.0456296			CAMK4	1.49492	0.001114	0.0198873
						NAAA	-0.787082	0.000895007	0.00746786			BNIP1	1.49594	1.05078e-05	0.00051657
						SNX20	-0.786533	0.000169815	0.00188812			MAP3K8	1.49792	1.17708e-07	1.19798e-05
						MTIF3	-0.786151	0.00178892	0.0128525			YWHAH	1.50091	3.13641e-05	0.00127632
						TLR1	-0.785219	0.00233065	0.0158995			MRPL54	1.50108	6.71204e-05	0.00231211
						ZNF589	-0.784263	0.00305048	0.0195553			TOGARAM2	1.50159	0.00132053	0.0226214
						MGST2	-0.784139	0.00733939	0.0388396			BEST1	1.50549	9.3754e-05	0.00291173
						SNX27	-0.782985	3.17629e-05	0.000459543			PSD	1.50564	0.00176527	0.0282184
						LTBR	-0.782874	0.00128269	0.00993193			HIF1A	1.50674	4.09343e-10	8.61323e-08
						CCT3	-0.782691	0.00305557	0.0195747			SRGN	1.50685	4.91959e-06	0.00028993
						TTC31	-0.781364	0.000373437	0.00365783			RBM38	1.50875	1.09445e-09	2.1851e-07
						ZNF106	-0.780717	0.000592767	0.00536723			TENT5C	1.51267	2.7998e-08	3.42381e-06
						DCTN2	-0.780369	0.00979097	0.048026			TACC1	1.51942	1.33606e-09	2.56287e-07
						TMOD2	-0.7803	0.000904935	0.00753741			JUN	1.52497	8.2454e-05	0.0026725
						MPHOSPH8	-0.77897	0.000251873	0.00263923			DNAJB11	1.53346	1.55944e-05	0.000703042
						COQ4	-0.778946	0.00160694	0.011805			ADNP2	1.53462	5.79984e-06	0.000330063
						DGLUCY	-0.778397	0.00220686	0.015253			CXCR4	1.53928	2.26174e-08	3.05112e-06
						C9orf64	-0.777414	0.00703374	0.0376859			CYSTM1	1.53937	0.0018315	0.0288993
						RNF111	-0.775912	0.00401892	0.0243607			MATN1	1.54034	0.0013303	0.0226731
						RGS2	-0.774966	0.00158783	0.0117192			LONRF1	1.54076	3.32177e-05	0.00130519
						DIP2A	-0.774321	0.000419637	0.0040249			IL2RA	1.54128	0.000131656	0.00382158
						HERC2	-0.773562	0.00249889	0.0167336			MZB1	1.55062	8.45192e-05	0.00269574
						DDX56	-0.772121	0.0046966	0.0275336			MAPKAPK2	1.55179	0.00112194	0.0199562
						PYGL	-0.770724	0.00978683	0.048026			LPIN1	1.55861	8.51948e-07	6.88811e-05
						RPL4	-0.769609	0.00689099	0.0371102			TGFBR1	1.56442	1.21772e-05	0.000569997
						COX15	-0.769119	0.00156666	0.0116152			PIM1	1.56651	1.21307e-05	0.000569997
						KATNA1	-0.768457	0.00919359	0.0459397			IRS2	1.56684	0.000157022	0.00443973
						MRPS35	-0.7682	0.00805592	0.0415267			COG3	1.57153	7.97322e-06	0.000426241
						KIAA0319L	-0.767376	0.000754297	0.00651201			IGHG3	1.57657	0.000440377	0.00951039
						GNPAT	-0.766743	0.00139275	0.0106105			GCSH	1.58091	0.00025689	0.00637083
						HNRNPF	-0.766572	0.0100628	0.0490039			ATXN1L	1.58147	2.22522e-08	3.05112e-06
						CREBL2	-0.765801	0.00753134	0.0394364			IGLV2-8	1.58179	0.00041418	0.0090647
						DUSP7	-0.764626	0.00137575	0.0105233			ULK2	1.58273	0.000290332	0.00688051
						DHX16	-0.763352	0.00317811	0.0201956			TRMO	1.58318	0.000175443	0.00482123
						TBC1D14	-0.762551	0.00985352	0.0482079			KDM2B	1.58504	2.71526e-06	0.000182632
						TK2	-0.76224	0.000709346	0.00617974			STX5	1.59077	9.68359e-06	0.000485818
						EEF1G	-0.761319	0.00159505	0.0117451			HSP90B1	1.59331	1.62389e-06	0.000117678
						DENND10	-0.760534	0.00716438	0.0382127			IFI44L	1.59362	8.07618e-05	0.00264448
						STAT5B	-0.760461	0.00166307	0.0121049			CD80	1.59607	0.000441507	0.0095138
						DCLRE1C	-0.759192	0.00114373	0.00904095			NUP58	1.59999	2.69303e-08	3.42154e-06
						PPP2R5A	-0.75888	0.00661122	0.0359927			PDE4B	1.60155	1.18281e-11	3.61608e-09
						ARL6IP5	-0.758486	0.00711595	0.0380187			QRICH2	1.61854	0.000401431	0.00886502
						GALNS	-0.757915	0.00925786	0.0461527			IER5	1.61892	1.02612e-05	0.00051004
						SLC2A9	-0.756727	0.00773993	0.0401509			JOSD1	1.62084	5.17481e-09	8.43753e-07
						PTGES3	-0.75403	0.00189926	0.0135323			AKT2	1.63182	1.44634e-05	0.000667432
						PDHB	-0.751981	0.00458259	0.0269822			PTGER4	1.64252	1.2927e-05	0.00059936
						ZBTB40	-0.750636	0.000627352	0.00559473			MTMR12	1.64282	6.69844e-08	7.36302e-06
						FGL2	-0.750205	0.00262305	0.0173562			DOT1L	1.6449	0.000111505	0.0033385
						IWS1	-0.750114	0.00149436	0.0111953			IL15RA	1.64742	0.000757496	0.0148522
						CCDC22	-0.748752	0.00320043	0.0203034			MTMR6	1.64865	5.23421e-05	0.00188259
						FBL	-0.748198	0.00209474	0.0146387			HMGB3	1.65232	0.000509175	0.0106665
						GDI2	-0.747956	0.00361734	0.0223561			C4orf46	1.66134	0.000164053	0.00458551
						OTULINL	-0.747376	0.000809753	0.00687164			TRIB1	1.67162	0.000471847	0.00999152
						ZBTB48	-0.74674	0.0103142	0.0498433			FILIP1L	1.67475	3.29963e-05	0.00130519
						NHLRC3	-0.746421	0.00594044	0.0329668			AGO2	1.68151	5.60767e-05	0.0019663
						PSMC6	-0.745067	0.000939778	0.00776609			RPRD1B	1.69024	1.68169e-07	1.56686e-05
						PRPF6	-0.743214	0.000218346	0.00231353			PHF19	1.69197	0.000287084	0.00683344
						MED22	-0.74222	0.00269906	0.017686			IL6	1.69456	0.000198782	0.00526581
						CTBP2	-0.741433	0.00135996	0.0104371			FBXO33	1.69776	0.000124436	0.00364477
						NSFL1C	-0.74073	0.000768306	0.00659683			RAPGEF2	1.71286	5.33705e-05	0.00190084
						NIT1	-0.740676	0.0025878	0.01726			FKBP11	1.71323	3.10584e-05	0.00127132
						AKNA	-0.740292	0.000140186	0.00160005			ZC3H12A	1.71546	5.57166e-08	6.33809e-06
						APEH	-0.740169	0.00985154	0.0482079			PPM1A	1.7203	1.14589e-07	1.18003e-05
						SAMM50	-0.738702	0.0058637	0.0326175			PITPNC1	1.72093	0.000322124	0.00753909
						CFDP1	-0.737934	0.00531858	0.0302629			SLAMF7	1.72378	2.74423e-06	0.000182632
						SIGLEC9	-0.737021	0.000769684	0.00660268			JMY	1.72967	2.97286e-06	0.000195191
						PTDSS1	-0.736996	0.00123718	0.00966652			MEF2D	1.73468	1.99585e-06	0.000137503
						SMARCE1	-0.736609	0.00222204	0.0153355			ARL5B	1.73577	0.000590916	0.0121704
						HADHA	-0.735869	0.00482146	0.0281282			SBDS	1.73654	1.11607e-14	5.1993e-12
						TRAPPC11	-0.734578	0.000318739	0.00319821			IFI44	1.73794	6.31018e-05	0.00220473
						FAM111A	-0.734068	0.00162837	0.0119346			IFITM1	1.74462	1.65375e-05	0.000735391
						MTF2	-0.734041	0.00241661	0.0163212			ISG15	1.74576	2.10062e-05	0.000897396
						MAN1A2	-0.733213	0.00558114	0.0313219			TP53INP2	1.74853	0.000203082	0.00531218
						POLL	-0.731524	0.00647994	0.0354822			ABCG1	1.74966	4.66898e-06	0.000280225
						VCPIP1	-0.731315	0.0010061	0.00822789			DUSP1	1.75579	9.04194e-06	0.000465565
						EEF2	-0.731238	0.00477221	0.0279595			GADD45B	1.75964	5.52588e-05	0.00195161
						METTL3	-0.728334	0.0080512	0.0415267			IGLJ3	1.76091	0.000118277	0.00349579
						IMPDH2	-0.727186	0.00115599	0.00911499			IFI27	1.78102	0.000351365	0.00793857
						MRPS33	-0.725543	0.0024799	0.0166299			DDX21	1.79085	8.13267e-14	3.45921e-11
						PIGBOS1	-0.725169	0.00429042	0.0255964			IGLC2	1.80045	4.64643e-05	0.00172182
						TRAM2	-0.724933	0.00924627	0.0461193			CCDC9	1.81436	8.04695e-05	0.00264448
						SDHAF2	-0.724911	0.00285438	0.0185302			TCOF1	1.83099	1.53855e-08	2.21348e-06
						LAT2	-0.723176	0.000210898	0.0022472			RELB	1.84426	1.5213e-06	0.000111901
						STING1	-0.722788	0.0055411	0.0311607			FNDC3B	1.84786	1.5957e-05	0.000713097
						GTF3C5	-0.722545	0.00164712	0.0120162			TSC22D3	1.85791	2.6388e-11	7.37582e-09
						NOL12	-0.722488	0.00196994	0.0139309			ICAM1	1.86288	1.51988e-06	0.000111901
						IRF3	-0.721855	0.00149742	0.0112084			IRF2BP2	1.86962	4.13801e-10	8.61323e-08
						RPLP0	-0.721233	0.00152025	0.0113533			ANKRD33B	1.88964	2.02634e-07	1.83552e-05
						PAN2	-0.719163	0.00338093	0.0211436			HERPUD1	1.89594	1.46654e-08	2.14136e-06
						RNF38	-0.718458	0.00244052	0.0164475			STAT4	1.89933	3.91124e-05	0.00149688
						CARD8	-0.715257	0.0030282	0.0194785			IFI6	1.90881	4.00219e-06	0.000250983
						PTPN18	-0.714546	0.00080108	0.00681026			SLC49A4	1.91534	0.00035544	0.00801213
						HAGH	-0.71318	0.00418608	0.0251324			CREM	1.92593	4.54854e-06	0.000274681
						PLCB2	-0.713115	1.40294e-05	0.000224613			NFKBIE	1.9387	1.0473e-06	8.06752e-05
						ANP32A	-0.711521	0.00733685	0.0388396			PALS2	1.94275	1.48533e-05	0.000675859
						ITFG2	-0.71053	0.00987898	0.0482585			KLF10	1.94382	3.06167e-10	6.96565e-08
						ZNF609	-0.710035	0.00257286	0.0171802			CASZ1	1.94386	1.08863e-05	0.000527155
						E2F4	-0.707617	0.00248811	0.0166732			DUSP4	1.95069	9.12631e-05	0.0028434
						STIP1	-0.707213	0.00313437	0.0199983			DDIT3	1.95736	2.02224e-09	3.59702e-07
						IGBP1	-0.705755	0.00668947	0.0362934			MAPK6	1.9687	1.41592e-07	1.38519e-05
						BLCAP	-0.70367	0.00723623	0.0384011			SLC7A5	1.97266	1.76941e-05	0.000779735
						IER2	-0.703139	0.00664725	0.0361473			JUND	1.98592	1.70618e-08	2.41907e-06
						SDHA	-0.697182	0.00124534	0.0097063			DDIT4	1.98625	2.6488e-08	3.40963e-06
						GBA2	-0.696351	0.00603976	0.0334592			TK1	1.98773	3.83966e-05	0.00147887
						TMEM43	-0.691496	0.00320855	0.0203344			BCL3	2.02368	0.000106533	0.00322665
						GPS1	-0.69116	0.007606	0.0396736			MASTL	2.03633	4.49825e-06	0.000274681
						BTN2A1	-0.690009	0.00614787	0.0339785			PPP1R15A	2.0369	4.23877e-12	1.38226e-09
						ALG3	-0.688947	0.00942907	0.0467599			FAM91A1	2.03808	1.61262e-07	1.53167e-05
						ATP6V1A	-0.688473	0.00152765	0.0113906			FOS	2.04874	6.67871e-08	7.36302e-06
						TM9SF2	-0.68776	0.00183698	0.0131479			BCL2A1	2.06086	3.272e-09	5.61578e-07
						MEFV	-0.685475	0.000603491	0.00543832			SEMA7A	2.06646	1.59632e-05	0.000713097
						RAB14	-0.685371	0.00163675	0.011959			UAP1	2.07072	9.22388e-06	0.000472446
						CAPN1	-0.684907	0.00387526	0.0237178			IER2	2.07178	1.71122e-07	1.57933e-05
						VPS36	-0.682676	0.00107299	0.00861395			TUBB2A	2.10779	9.5669e-06	0.000484938
						RASSF3	-0.680505	0.00458965	0.0269902			ZBTB21	2.11247	8.24159e-08	8.76385e-06
						ERICH1	-0.679343	0.00697671	0.0375291			OASL	2.11591	1.85839e-05	0.000808028
						KPNB1	-0.679261	0.000626175	0.0055895			MKI67	2.11695	5.07473e-05	0.00183875
						AHCY	-0.679224	0.00911335	0.0456296			SNX9	2.16121	2.02662e-08	2.83235e-06
						KLHL6	-0.679103	0.00148887	0.0111807			CSRNP1	2.1707	1.60898e-09	2.96994e-07
						CYB5R1	-0.677526	0.0033061	0.0208271			NINJ1	2.17914	8.60845e-06	0.000450356
						CYB561D2	-0.675988	0.00412878	0.0248673			EZH2	2.18112	3.41646e-08	4.07601e-06
						CASP4	-0.675655	0.00723292	0.0384011			TOP2A	2.18749	0.000187437	0.00507949
						TSPAN32	-0.675424	0.00188351	0.0134402			IL6ST	2.18926	9.4033e-07	7.42061e-05
						FYB1	-0.673317	0.00454935	0.0268534			JUNB	2.20871	1.55429e-12	5.63172e-10
						BIN2	-0.672736	0.00859307	0.0435265			B4GALT4	2.26523	6.08151e-11	1.60798e-08
						CEP104	-0.671105	0.00550706	0.0310535			RHOB	2.2729	8.8938e-06	0.00046036
						OSCAR	-0.668878	0.00399798	0.0242999			SOCS3	2.34563	2.97116e-05	0.0012213
						ABCD4	-0.667821	0.0082032	0.042047			ELL2	2.34735	1.30828e-08	1.93923e-06
						CD300LF	-0.667769	0.000118227	0.00139833			PRDM1	2.40032	1.08701e-08	1.66159e-06
						SEC61A1	-0.667383	0.00821323	0.0420756			AREG	2.49651	3.06559e-07	2.70187e-05
						GRHPR	-0.667005	0.00926417	0.0461599			XBP1	2.50221	3.19674e-08	3.86096e-06
						HSPD1	-0.666844	0.00628088	0.0345321			PMAIP1	2.52054	2.34588e-10	5.5975e-08
						PPIE	-0.66678	0.00455876	0.0268754			ZBTB10	2.57599	3.72654e-10	8.10149e-08
						EEF1A1	-0.66593	0.007467	0.0392515			RGS16	2.57943	4.38065e-06	0.000270437
						NACC2	-0.665025	0.00232488	0.0158831			IGKV2D-28	2.58344	3.6587e-12	1.23425e-09
						COMMD9	-0.664984	0.00428045	0.0255531			TRAF4	2.6163	1.76134e-15	9.06907e-13
						FLOT2	-0.664411	0.00671212	0.036373			SLC2A3	2.65992	2.45352e-26	3.42897e-23
						FLAD1	-0.664014	0.00559321	0.0313533			EGR1	2.66357	3.19444e-09	5.58058e-07
						ISCU	-0.662693	0.00236042	0.0160679			IGHG4	2.74469	0.000245099	0.00614822
						ZDHHC7	-0.662414	0.00119763	0.00940413			SGK1	2.82282	2.63363e-11	7.37582e-09
						SUMF1	-0.661044	0.000799527	0.00680929			NFKBID	2.82733	1.05467e-39	5.15891e-36
						CNN2	-0.654467	0.000569171	0.00519335			PER1	2.84214	9.45935e-16	5.14116e-13
						RPL3	-0.653165	0.00878449	0.0443064			RGS1	2.85961	2.27673e-08	3.05112e-06
						SMC3	-0.652058	0.00664676	0.0361473			PIM3	2.93248	8.69824e-14	3.54562e-11
						CCT4	-0.649538	0.00178563	0.0128386			BCL2L11	2.93569	4.16973e-18	2.7195e-15
						PLPPR2	-0.648032	0.00532066	0.0302629			FOSL2	2.93728	1.26775e-08	1.90806e-06
						ZNF652	-0.647605	0.0015676	0.0116152			CDKN1A	2.97649	2.92082e-14	1.29884e-11
						WNK1	-0.646187	0.010188	0.0493848			SIK1B	3.00802	5.76158e-19	4.33581e-16
						SLC24A4	-0.645723	4.5511e-05	0.000623192			TNFAIP3	3.03561	6.06283e-16	3.70704e-13
						ZNF33A	-0.645652	0.00360562	0.0223275			NFKBIA	3.05265	8.16073e-22	7.25786e-19
						MRPS18B	-0.64549	0.00194227	0.0137765			DUSP5	3.14684	6.3876e-09	9.91903e-07
						QARS1	-0.645141	0.007498	0.0393271			TAMALIN	3.15144	7.37634e-07	6.16775e-05
						MIEF1	-0.643311	0.00370682	0.0228346			ZNF331	3.17022	2.1242e-38	6.92702e-35
						DOK2	-0.642306	0.00198583	0.0140088			KDM6B	3.18994	2.58071e-24	2.80523e-21
						HCK	-0.641008	0.00297243	0.0191787			PELI1	3.29676	2.68983e-34	6.57865e-31
						SCNM1	-0.640817	0.000465763	0.00437642			CD69	3.37207	7.18108e-25	8.78156e-22
						CMTM3	-0.639774	0.00648448	0.0354865			DUSP10	3.42094	7.62682e-16	4.38901e-13
						SLC38A10	-0.639186	0.00404225	0.0244864			DUSP2	3.44938	1.74618e-10	4.27073e-08
						SLC25A11	-0.637032	0.00959114	0.0473156			IGHG1	3.66252	7.34232e-11	1.89026e-08
						DELE1	-0.635644	0.0035237	0.0219495			NR4A3	3.84661	1.75816e-11	5.21214e-09
						RBBP5	-0.63526	0.00503274	0.0290188			RGS2	4.19073	1.97368e-26	3.21809e-23
						FGD2	-0.634738	0.00430661	0.0256445			NR4A1	4.4738	2.14081e-32	4.1887e-29
						NPM1	-0.633285	0.000925963	0.00767876			CD83	4.6781	2.1374e-64	2.09102e-60
						SNX1	-0.627991	0.00409189	0.024708			NR4A2	5.35071	7.48762e-24	7.32514e-21
						CD48	-0.627882	0.00571955	0.0318906
						CHD9	-0.626883	0.00868508	0.0438986
						NDE1	-0.626221	0.00282528	0.0183984
						SAMHD1	-0.625623	0.00371554	0.0228734
						ANAPC5	-0.623985	0.00293811	0.0189893
						POLD4	-0.622935	0.00635106	0.0348447
						MAVS	-0.621278	0.000151061	0.00170565
						USP39	-0.62046	0.0061101	0.0338092
						CALM2	-0.619893	0.00335403	0.0210073
						DNAJA1	-0.618481	0.00668671	0.0362934
						NADK	-0.616727	0.00399518	0.0242999
						PPP1CC	-0.614599	0.00715716	0.0381957
						CLEC4A	-0.613187	0.00698559	0.0375432
						TGFBR2	-0.611003	0.00426018	0.0254803
						AGO4	-0.604834	0.000432705	0.00412312
						PRPF4B	-0.604113	0.00883785	0.0445281
						CLTA	-0.601745	0.00194741	0.0138026
						ARHGEF40	-0.60089	0.00775243	0.0401937
						CORO1A	-0.599366	0.00657264	0.0358653
						OXA1L	-0.599251	0.00112724	0.00893363
						PIGM	-0.597672	0.00400606	0.0243295
						NDUFV1	-0.596764	0.00275867	0.0180266
						SOD1	-0.596094	0.00132322	0.0101957
						TEX264	-0.595148	0.00992688	0.0484415
						SELPLG	-0.594185	0.0100983	0.049126
						SSR1	-0.593346	0.00901992	0.04524
						PAK1	-0.589593	6.24269e-05	0.000819256
						HLA-DMB	-0.587053	0.00432625	0.0257291
						ADSL	-0.584272	0.00310209	0.019819
						CARD16	-0.583554	0.00411291	0.0248033
						NAIP	-0.582405	0.00158155	0.0116911
						VRK3	-0.5801	0.00213551	0.0149013
						CCT6A	-0.578338	0.00922235	0.0460242
						AP1M1	-0.578284	0.00422481	0.0253488
						GGPS1	-0.573644	0.00911435	0.0456296
						TPT1	-0.568801	0.00987916	0.0482585
						ATXN7L3B	-0.566195	0.00490613	0.0285321
						N4BP2L2	-0.563945	0.00108382	0.00866142
						CRKL	-0.563629	0.00987158	0.0482585
						RAB10	-0.562374	0.00262526	0.0173587
						COMMD6	-0.558211	0.00158686	0.0117192
						BUB3	-0.553449	0.00415596	0.0249992
						IL16	-0.552362	0.00509387	0.0292998
						LRRC25	-0.550925	0.00154496	0.0115105
						RPL10	-0.548325	0.0102834	0.0497451
						PAXX	-0.547912	0.00721865	0.038394
						KCTD12	-0.546395	0.00303767	0.0195128
						PHKG2	-0.546294	0.00687854	0.0370642
						C16orf54	-0.544998	0.00722937	0.0384011
						RAB24	-0.543516	4.04522e-05	0.000568698
						CYBB	-0.5423	0.00833094	0.0425404
						HIPK3	-0.539598	0.00537605	0.0305331
						WDR11	-0.538499	0.00848407	0.0430898
						NAP1L1	-0.534462	0.00442057	0.0261421
						IGSF6	-0.533256	0.00659887	0.0359529
						VPS35	-0.532815	0.0101607	0.0492839
						GRK3	-0.531117	0.0026897	0.0176859
						PPP1CA	-0.529599	0.00556745	0.0312636
						NDUFS3	-0.51604	0.00699518	0.0375643
						LIMD2	-0.510986	0.00857283	0.0434473
						TANGO2	-0.506796	0.00538087	0.0305422
						MYO1F	-0.504312	0.00424851	0.0254265
						NCF2	-0.502155	0.00478252	0.0279853
						ARL6IP4	-0.496818	0.00324857	0.0205549
						DR1	-0.495695	0.00398743	0.0242999
						NUDC	-0.495449	0.00565525	0.0316253
						CNOT8	-0.494589	0.00517386	0.0296517
						EIF4E2	-0.490439	0.00361288	0.0223432
						ELOVL1	-0.489558	0.00942848	0.0467599
						STAT6	-0.487631	0.000642641	0.00571492
						STX16	-0.480863	0.00304449	0.0195395
						RPL22	-0.480702	0.00744011	0.0391537
						PNISR	-0.477686	0.00574134	0.0319744
						SET	-0.471116	0.00855503	0.0433803
						ARHGAP1	-0.46832	0.00142718	0.0107773
						PFKL	-0.466424	0.00984159	0.0482079
						MAU2	-0.456002	0.00814295	0.0418288
						MPV17	-0.446984	0.00632492	0.0347338
						CSF1R	-0.423865	0.00743169	0.0391311
						TNFAIP2	-0.401649	0.00994986	0.0485287
						MBNL1	-0.389508	0.00606463	0.0335773
						ARHGAP30	-0.380476	0.00751524	0.0393738
						LASP1	-0.367121	0.00964604	0.0474874
						RPS19	0.273701	0.00773616	0.0401509
						USP4	0.313863	0.00720583	0.0383474
						RAP1B	0.376199	0.00530745	0.0302629
						EIF4A1	0.423155	0.000448004	0.00424325
						HNRNPDL	0.424056	0.0102561	0.0496387
						EIF5A	0.430856	0.00963624	0.0474639
						NRDE2	0.430957	0.00112733	0.00893363
						SPEN	0.440459	0.00839822	0.0427685
						ABHD16A	0.460227	0.00855068	0.0433803
						PLEC	0.465392	0.000327711	0.00326721
						MACROH2A1	0.467932	0.0013925	0.0106105
						FCER1G	0.468821	0.0023677	0.0160827
						PI4KA	0.475021	0.00817599	0.041953
						CHMP1B	0.475108	0.00497379	0.028837
						EFHD2	0.488276	0.0035629	0.0221499
						YME1L1	0.490614	0.000560104	0.00512049
						CDC37	0.493501	0.00417444	0.0250784
						DDX3X	0.496932	0.00479961	0.0280333
						SERPINB9	0.498485	0.00435544	0.0258539
						STK4	0.506171	0.00497731	0.0288397
						WDR1	0.508002	0.000990268	0.00812656
						RAB21	0.510032	0.0081176	0.0417212
						RBM39	0.519104	0.00211205	0.0147485
						UBC	0.520857	0.00897423	0.0450473
						SENP5	0.52266	0.00287668	0.0186433
						ATP1B3	0.525887	0.00333445	0.0209431
						GMEB1	0.528372	0.00310827	0.0198451
						ADAR	0.528496	0.00303267	0.019494
						SCAF11	0.530383	0.00413334	0.0248789
						IQGAP1	0.532134	0.00142384	0.010768
						HECA	0.532795	0.00166311	0.0121049
						CYTH1	0.533034	0.000589566	0.00535362
						EMC3	0.533983	0.00874387	0.0441486
						SMPD4	0.537252	0.00479311	0.0280126
						PHACTR4	0.538847	0.00431958	0.0257056
						TBL1XR1	0.545352	0.00920056	0.0459397
						METTL2B	0.549287	0.00510895	0.0293687
						ELOC	0.54941	0.00260131	0.0172848
						ATP6V0A2	0.552767	0.00885276	0.0445321
						AAK1	0.555275	0.00057999	0.00528187
						TRA2B	0.556901	0.00635248	0.0348447
						RGS10	0.558634	0.00939788	0.0467277
						SPPL2A	0.559242	0.00207845	0.0145569
						PDLIM5	0.561872	0.00722873	0.0384011
						SLC35E3	0.562837	0.00538673	0.0305459
						STK10	0.563521	0.00105764	0.00853148
						WDR26	0.567748	0.00974614	0.0478806
						MFN2	0.568016	0.0067385	0.0364165
						SYNE3	0.569984	0.00195884	0.0138628
						TMEM41B	0.570189	0.010107	0.0491279
						MATR3	0.572506	0.00717519	0.0382488
						NCAPH2	0.573515	0.00885108	0.0445321
						BOD1L1	0.576875	0.00330519	0.0208271
						PCBP1	0.58368	0.00323255	0.0204728
						TOX4	0.58467	0.000159544	0.00179075
						BRD2	0.588174	0.000226486	0.00239443
						NSMAF	0.597361	0.00656618	0.0358507
						SNN	0.60199	0.00112154	0.00890665
						AZIN1	0.604845	0.00513889	0.0295229
						ATP2A2	0.605488	0.0061627	0.0340406
						SH2B3	0.6082	0.000659079	0.0058501
						MPV17L	0.61056	0.00834916	0.0426104
						PLLP	0.611934	0.00241158	0.0163105
						TPM3	0.612262	0.0012217	0.00956934
						ETNK1	0.616379	0.00146395	0.0110198
						TACC1	0.619208	0.00141842	0.0107457
						RHBDF2	0.619679	0.00531707	0.0302629
						ATP6V0C	0.621687	0.000630972	0.00562171
						UBXN2A	0.622442	0.00136007	0.0104371
						EXOSC6	0.626515	0.00200234	0.0140864
						RCC2	0.628961	0.000396914	0.00384487
						GGNBP2	0.629232	0.00218901	0.0151517
						NEMF	0.629405	0.00808085	0.0415775
						SNRPA1	0.629457	0.000938598	0.00776312
						IAH1	0.630499	8.72526e-05	0.00107358
						ABCF1	0.630996	0.000551335	0.00505543
						MAP2K3	0.632015	1.88464e-05	0.00029138
						METTL21A	0.635571	0.00544522	0.0307782
						RALBP1	0.637749	0.00747685	0.0392597
						PXMP4	0.638925	0.00666669	0.0362322
						SLC35E1	0.639704	0.000291448	0.00297485
						OGDH	0.641475	0.00188279	0.0134402
						HUS1	0.641701	0.00919571	0.0459397
						DYNC2LI1	0.642275	0.00317336	0.020179
						MTMR6	0.644062	0.00863924	0.043737
						LCOR	0.644179	0.00495215	0.0287644
						GUCD1	0.644315	0.0043373	0.0257786
						ARFGEF2	0.646459	0.00447045	0.0264206
						EP300	0.647358	4.37285e-06	8.00308e-05
						TLCD2	0.648822	0.00529227	0.0302205
						BLVRA	0.649159	0.00705388	0.037751
							0.652775	0.000420479	0.00402602
						CCL5	0.652944	0.00915435	0.0457814
						SNRK	0.652947	0.00157114	0.0116324
						XPNPEP1	0.65406	0.00214961	0.0149581
						SLC25A37	0.655622	0.010162	0.0492839
						RHNO1	0.655698	0.00755307	0.0395283
						PPP2CA	0.656494	6.58819e-05	0.000858642
						VTI1A	0.657755	0.00411787	0.0248174
						EDEM1	0.659856	0.00545956	0.0308408
						ERVK3-1	0.661122	0.00515433	0.0295936
						CTDSP1	0.662371	0.00026824	0.00277994
						BFAR	0.663912	0.00170439	0.0123673
						EIF5	0.6672	0.00223561	0.0154179
						RIN2	0.667433	0.00260701	0.0172984
						NR4A2	0.66806	0.00397024	0.0242364
						GBP2	0.668821	0.00136545	0.0104699
						IFI30	0.670331	0.0013443	0.0103329
						CEP68	0.670816	0.00985161	0.0482079
						YTHDF3	0.671143	0.00314	0.0200207
						PPP1R15A	0.672065	0.00298092	0.0192135
						COQ10B	0.672217	0.00113981	0.00902502
						OPA3	0.673492	0.000289948	0.00296593
						MAML2	0.674508	0.00719695	0.0383216
						HNRNPA3	0.67816	0.00111662	0.0088785
						MYLK3	0.678724	0.00427534	0.0255508
						ESYT2	0.67876	0.000503284	0.0046917
						PNPLA8	0.679918	0.00612243	0.0338576
						NUP58	0.681004	0.00427736	0.0255508
						MOAP1	0.68183	0.00957773	0.0472741
						EMILIN2	0.682617	1.58142e-05	0.000248561
						MBP	0.683639	0.00960516	0.0473354
						PNPT1	0.683792	0.000680299	0.00598947
						YTHDC1	0.684589	0.00409662	0.0247208
						SPATS2L	0.684685	0.00843954	0.0429097
						EIF4E	0.685106	0.0014034	0.010683
						RHOC	0.686126	0.00370038	0.0228098
						LAIR1	0.687186	0.0101221	0.049166
						ZDHHC3	0.689227	0.00814785	0.0418312
						MYADM	0.689759	0.000364644	0.00358283
						ZPR1	0.690217	0.000147768	0.00167447
						BABAM2	0.690946	0.00968996	0.047654
						PSPN	0.691616	0.00499989	0.0288998
						LRG1	0.694342	0.00623735	0.0343326
						TNFRSF1A	0.694831	0.0019544	0.0138417
						ILF3	0.69587	0.00542905	0.0307185
						IZUMO2	0.700769	0.00638525	0.0349839
						MMACHC	0.701311	0.00659774	0.0359529
						MTRNR2L4	0.701482	0.00315187	0.0200828
						AKAP8	0.703222	0.000824356	0.00696434
						CHD4	0.704136	2.08962e-05	0.000319935
						GPR132	0.704665	0.00192275	0.0136638
						SLC43A3	0.704859	0.00119988	0.00941398
						VAMP5	0.70642	0.00734779	0.0388491
						NFKB1	0.707861	0.000328033	0.00326721
						APBB3	0.709828	0.00164132	0.0119832
						MYD88	0.710178	2.56933e-05	0.000382248
						PRXL2C	0.710451	0.000101482	0.00122948
						H2AJ	0.713248	0.00335469	0.0210073
						LYN	0.713404	2.3665e-06	4.58957e-05
						BCLAF3	0.714207	0.00830933	0.0424529
						MANSC1	0.714976	0.00478683	0.0279932
						TMEM107	0.715799	0.00434433	0.0258042
						COLEC12	0.718452	0.00852881	0.0432938
						USP3	0.721222	9.94353e-06	0.000165353
						MTRNR2L8	0.721343	0.00329229	0.0207819
						WTAP	0.721708	8.20038e-05	0.00102095
						C2CD3	0.723229	0.00032762	0.00326721
						TRAPPC10	0.723526	0.000786295	0.00673296
						BACH1	0.725698	0.00239686	0.0162342
						SUB1	0.725716	0.000130134	0.00151641
						RHEB	0.727744	0.00262871	0.0173693
						PPIL4	0.729338	0.00698728	0.0375432
						MS4A4E	0.729734	9.51992e-05	0.00115781
						MDM2	0.730284	4.79457e-06	8.67423e-05
						ZNF655	0.731444	2.66337e-05	0.000393148
						CD300LB	0.731538	0.00660011	0.0359529
						PRKAG2	0.731974	0.000528833	0.00489132
						YPEL5	0.732824	0.00290349	0.0187784
						VSIG1	0.733167	0.00947659	0.0468482
						MPHOSPH6	0.734264	0.00701186	0.0376326
						PDE12	0.73499	0.00012559	0.0014707
						ARHGAP26	0.735308	0.000188539	0.00205762
						RASA3	0.736089	0.00270681	0.0177245
						SRGAP2B	0.737028	0.00297033	0.0191787
						ZNF70	0.737425	0.00533957	0.0303441
						PTGR2	0.737637	0.0103059	0.0498285
						ELL	0.738303	0.000756885	0.00651651
						DTX4	0.738933	0.00793141	0.0409869
						PLEKHM1	0.740605	3.58279e-09	1.40084e-07
						RIT1	0.741825	0.0019235	0.0136638
						TMEM170B	0.742157	0.000415158	0.0039921
						OCLN	0.742454	0.00779385	0.0403642
						NDEL1	0.745304	0.00285299	0.0185302
						ATP6V0A1	0.746917	0.00171742	0.0124523
						NEU1	0.747568	0.000640579	0.00570193
						SASH3	0.747808	1.15986e-08	4.02e-07
						GVQW3	0.751697	0.00220592	0.015253
						MAPRE1	0.752483	0.00107168	0.00861395
						FAM234B	0.752606	0.00929971	0.0463125
						SH3TC1	0.752775	0.000700026	0.00611602
						LRRFIP1	0.752883	1.39225e-08	4.75578e-07
						ZFP36	0.754143	4.67217e-05	0.000636087
						TCF25	0.754733	0.000438918	0.00416972
						ICA1L	0.754754	0.000966736	0.00797494
						KIAA1958	0.755446	0.00554253	0.0311607
						DRAM1	0.75735	0.0040143	0.0243483
						ZSWIM6	0.758127	0.00174797	0.0126111
						TBK1	0.758886	0.00571757	0.0318906
						H2BC21	0.758904	0.00746157	0.0392448
						BLOC1S2	0.762331	0.00137738	0.0105273
						ITPKB	0.76319	0.00559442	0.0313533
						KBTBD2	0.763266	0.00769995	0.0399874
						VASP	0.765963	0.000337318	0.0033386
						ADAMTS4	0.768109	0.00265468	0.017499
						HMGXB4	0.768268	0.00702968	0.0376854
						PDLIM7	0.768474	0.00757622	0.0395676
						LILRB4	0.7708	0.00218067	0.0151051
						MICALL1	0.77085	0.0056665	0.0316695
						MEF2A	0.771918	0.0048405	0.0281851
						SEC14L1	0.77276	0.0014931	0.0111947
						MKNK1	0.773654	0.000288079	0.00295641
						IBA57	0.775012	0.00239659	0.0162342
						PPM1A	0.777048	0.000816168	0.00690941
						TAGAP	0.777899	0.00345023	0.0215344
						MTRNR2L12	0.779701	0.00129542	0.00999775
						FBXO48	0.780792	0.00531472	0.0302629
						OR2A5	0.781716	0.00931297	0.0463542
						IRGQ	0.784132	6.87032e-05	0.000884449
						MED13	0.784196	0.00802733	0.0414373
						SEC16A	0.785256	9.12916e-06	0.000152885
						CORO1C	0.785907	0.000809129	0.00687164
						SRGAP1	0.786697	0.00913261	0.0456969
						DENND6A	0.786699	0.00125055	0.00973486
						SHCBP1	0.787359	0.00297348	0.0191787
						CARD19	0.787804	0.00331288	0.0208559
						PDE6A	0.7884	0.0065113	0.0355921
						EMP3	0.789301	1.04556e-06	2.20829e-05
						FURIN	0.789559	0.00037566	0.003672
						SIPA1L1	0.790922	0.00620454	0.0342118
						RRBP1	0.792541	0.00335293	0.0210073
						C15orf39	0.793306	6.86063e-06	0.000119111
						SYAP1	0.794121	1.16641e-07	3.17142e-06
						SBF2	0.794432	0.00603738	0.0334592
						OR7C1	0.794796	0.000755148	0.00651341
						ZNF442	0.795642	0.00277413	0.0181026
						CACNG8	0.798381	0.00331683	0.0208572
						TP53BP2	0.800644	0.00073613	0.00636679
						R3HDM1	0.800723	0.00840421	0.042776
						WDFY1	0.804563	0.0017558	0.012653
						ANKLE2	0.805808	0.00141802	0.0107457
						SLC15A3	0.805828	3.0441e-06	5.74915e-05
						SPI1	0.806256	9.27215e-06	0.000155006
						ACBD7	0.806603	0.00806346	0.0415267
						CLIP1	0.806974	0.00278713	0.0181749
						PABPC4	0.807256	0.00523078	0.0298875
						ZBTB8A	0.807721	0.00127048	0.0098616
						MARCHF6	0.810349	4.93605e-06	8.86241e-05
						S100A10	0.811245	0.000115778	0.00137625
						MORF4L2	0.811704	0.000109852	0.00131406
						TRAF6	0.811769	0.00214256	0.0149285
						EXPH5	0.813733	8.10932e-05	0.00101094
						IL7R	0.813884	0.00945808	0.0468409
						ZFP36L1	0.814227	0.00142481	0.010768
						IRF9	0.816093	9.0603e-05	0.00111191
						CYP27C1	0.816752	0.0101556	0.0492839
						OR7G2	0.817154	0.00466487	0.0274142
						FMNL1	0.81842	4.3455e-05	0.00060179
						MTRNR2L1	0.819109	0.00114653	0.00905549
						CKAP4	0.819236	2.46543e-05	0.000370545
						SLC26A2	0.820033	0.0076526	0.039807
						CSGALNACT2	0.821436	6.51703e-05	0.000850539
						SRGAP2C	0.824343	0.000540893	0.00498338
						NFE2L2	0.826977	0.000441214	0.00418733
						ENAH	0.829597	0.0100007	0.0487512
						AMPD2	0.831945	1.38347e-09	5.81797e-08
						P2RX4	0.833736	0.00116559	0.00918305
						CYRIA	0.833917	7.16466e-05	0.000916109
						SYNJ2	0.833985	0.00806274	0.0415267
						RHOQ	0.834799	4.57785e-05	0.000624144
						TTC39B	0.835206	0.000353735	0.00348288
						TSKU	0.836981	0.00736253	0.0388969
						NAPG	0.837601	0.00108566	0.00866179
						UHRF1BP1L	0.838092	0.00517202	0.0296517
						AP2A2	0.841951	0.00360149	0.0223165
						IDI1	0.843125	0.000139922	0.00159896
						HNRNPL	0.843876	4.20999e-05	0.000588403
						DNAJC21	0.845431	0.00940983	0.046738
						NR1H2	0.846153	0.000114358	0.00136108
						NOL4L	0.848072	0.000171456	0.00189967
						DVL3	0.848938	0.00709363	0.0379208
						VDR	0.849149	0.00245779	0.016534
						HCAR3	0.852948	0.00417027	0.0250693
						CLK1	0.853199	2.07162e-05	0.000318208
						SH3BP2	0.85426	4.52204e-05	0.00062011
						DDX60	0.855592	0.00895987	0.0449991
						GNE	0.856524	0.00095988	0.00792529
						ZFC3H1	0.858657	2.33761e-06	4.56994e-05
						GPR35	0.861556	0.000584914	0.00531648
						PPCDC	0.861621	0.00298482	0.0192256
						ACOT9	0.862185	8.77069e-08	2.46256e-06
						GGA1	0.863107	5.60789e-05	0.000745251
						ECE1	0.864407	8.60601e-06	0.000145152
						LUC7L2	0.865233	0.000295166	0.00300631
						POMP	0.866341	5.56393e-06	9.85878e-05
						ZDHHC5	0.867012	0.00229583	0.0157251
						KIAA2026	0.86713	0.007823	0.0404709
						ZDHHC20	0.867133	0.00229678	0.0157251
						SBDS	0.867333	0.000275204	0.00284588
						HMGA2	0.869047	0.00250243	0.0167454
						PPP2R2A	0.870013	0.00197254	0.0139389
						ITPRID2	0.870843	0.000308531	0.00311228
						PCDHGA8	0.871807	0.0088085	0.0444038
						HSH2D	0.875451	0.00101772	0.00829182
						CHKA	0.877243	0.000164262	0.001835
						CYLD	0.877526	0.00650407	0.0355731
						STK40	0.877855	0.000450924	0.00426238
						PID1	0.879224	0.00225085	0.0155004
						C5AR2	0.880876	7.82317e-05	0.000985235
						SOD2	0.881017	0.000193186	0.00209565
						TUT7	0.882394	0.00237192	0.0160998
						SLC25A34	0.884258	0.000133149	0.00154395
						IRF7	0.886351	0.00368502	0.022742
						ZFP42	0.888743	0.00508077	0.02926
						SLC3A2	0.889752	1.99475e-06	3.97354e-05
						WDR43	0.892687	0.00285727	0.0185302
						KCNV1	0.894502	0.00886124	0.0445511
						GP6	0.894638	0.00702847	0.0376854
						KLB	0.894974	0.00173711	0.0125566
						ITGA5	0.895667	0.00155013	0.0115302
						PUS10	0.895743	0.00740584	0.0390239
						LRRC8B	0.89934	0.00841029	0.042784
						YJU2	0.899907	0.00046792	0.00439232
						RIOK3	0.899992	3.84815e-06	7.0977e-05
						LIMD1	0.900012	3.34704e-05	0.0004806
						DNAJB1	0.900173	0.000201149	0.00216339
						HIVEP3	0.900231	0.0102112	0.0494716
						TPD52L2	0.900662	1.01822e-05	0.000168709
						LCTL	0.901253	0.00902218	0.04524
						PGPEP1	0.901302	0.00273575	0.0178892
						MAP2K1	0.90238	0.000711719	0.006187
						SLC7A11	0.902466	0.00838184	0.0427311
						MYO9B	0.903847	0.00333558	0.0209431
						RNF207	0.904932	0.00957181	0.0472696
						ZNF85	0.905769	0.00944782	0.0468283
						PFKP	0.90693	0.00262192	0.0173562
						ING5	0.907048	0.000299378	0.00303613
						DNAJB14	0.909971	0.000570457	0.00520006
						HELZ2	0.912095	0.00158155	0.0116911
						TRMO	0.912552	0.00261605	0.0173341
						PTBP2	0.912843	0.00106327	0.00856956
						REL	0.913081	2.73088e-05	0.000401236
						SLC35B2	0.91448	0.00522724	0.0298853
						BCLAF1	0.914811	1.6931e-08	5.6211e-07
						ARHGDIA	0.915827	6.0228e-05	0.000793701
						ZEB2	0.917008	0.000119808	0.00141453
						ERN1	0.918712	0.00075268	0.00650398
						RARA	0.920746	0.000205259	0.00219702
						TCEANC2	0.921593	0.00946053	0.0468409
						PTPN12	0.922295	0.00672749	0.0364162
						MOV10	0.922334	0.00169545	0.0123118
						DENND4A	0.922542	0.00103745	0.00839002
						SAP30BP	0.923291	2.55923e-05	0.000381346
						APLP1	0.925093	0.00763775	0.0397516
						KYNU	0.925424	8.76958e-05	0.00107763
						C8orf34	0.927128	0.00712358	0.038038
						FBXO33	0.929375	0.00532208	0.0302629
						ZNF394	0.930374	4.44503e-07	1.02583e-05
						DOCK5	0.931861	8.28493e-05	0.00102656
						GRPEL1	0.931954	6.65626e-05	0.000866321
						NFAT5	0.932452	0.000335832	0.00332738
						ANKRD9	0.932753	0.00269177	0.017686
						THAP4	0.933536	0.0067368	0.0364165
						FBXW7	0.936154	0.000759959	0.00653703
						FLVCR2	0.936898	0.00386031	0.0236416
						MCL1	0.937162	9.29333e-10	3.97889e-08
						HTT	0.938215	0.00191302	0.01362
						PPARD	0.938627	0.00166697	0.0121156
						TPCN2	0.939084	0.000113773	0.00135582
						GABPB1	0.939846	0.000551266	0.00505543
						GRM6	0.941739	0.00360831	0.0223295
						MAFG	0.942241	0.000133377	0.00154469
						RAP2B	0.942846	2.88502e-05	0.000420618
						LY6G5B	0.944799	0.000792987	0.006778
						MAPK9	0.947269	0.00636039	0.0348679
						DDAH2	0.948092	0.00124454	0.0097063
						PTGER2	0.948391	0.0002443	0.00256841
						PARD6B	0.948748	8.05114e-05	0.00100634
						ATF4	0.950058	8.31347e-09	3.01387e-07
						SRA1	0.953063	1.63387e-08	5.48214e-07
						SREK1	0.954536	0.000170239	0.00189061
						TOB1	0.954989	0.00378886	0.0232642
						SLC25A28	0.956065	0.00107333	0.00861395
						TCOF1	0.956282	0.00355237	0.022099
						RAP1GAP2	0.957515	0.000936727	0.00775443
						EPHB2	0.957927	0.00200751	0.0141018
						PPRC1	0.959084	0.000319988	0.00320733
						MTPAP	0.960376	8.3474e-05	0.00103111
						RPRD1B	0.963839	0.000378439	0.00369535
						BZW1	0.964566	0.000385067	0.00373693
						C16orf72	0.964721	5.71419e-11	3.10734e-09
						FBRS	0.96473	0.00026147	0.00271871
						CBX6	0.965531	0.000286481	0.00294639
						OAS3	0.96596	0.000237039	0.00249762
						TOM1	0.966454	2.23405e-08	7.0935e-07
						ARPC5L	0.966733	0.00097716	0.0080399
						NUP98	0.966889	0.000116811	0.00138504
						FZR1	0.968089	0.00141359	0.0107433
						SUPT6H	0.969048	0.000215109	0.00228436
						AKIRIN2	0.970833	1.08688e-05	0.000177618
						TLCD5	0.971198	0.00498682	0.0288772
						LIMS1	0.971339	5.86284e-05	0.000775569
						TNFAIP8L3	0.971666	0.00304594	0.0195395
						VPS37B	0.972562	1.29685e-05	0.000209757
						CLIP4	0.97374	0.00740262	0.0390239
						EFR3A	0.973951	0.000454611	0.0042845
						MED13L	0.975386	5.61524e-07	1.27413e-05
						RABL3	0.976551	0.00739066	0.0390175
						DIRAS2	0.979107	0.000596182	0.00538784
						RSRC2	0.982332	2.77956e-07	6.83122e-06
						ECD	0.983613	0.000124826	0.00146539
						ZNF350	0.984316	0.000613498	0.0055128
						ATP1A1	0.98444	3.6277e-08	1.11085e-06
						COPS2	0.98552	0.00246409	0.0165474
						ETV6	0.986064	0.00020268	0.00217433
						ZNF669	0.986218	0.00117494	0.00924131
						CCR4	0.986775	4.36686e-05	0.000603201
						FOXN3	0.988578	0.00269755	0.017686
						RBBP6	0.989629	0.0025887	0.01726
						EML4	0.989775	0.00199599	0.0140527
						CCNL1	0.99079	2.67077e-07	6.65021e-06
						CDK9	0.991335	0.000686676	0.0060328
						PLBD2	0.992589	1.47166e-05	0.000234031
						MAPK1IP1L	0.994124	2.08379e-08	6.70639e-07
						SPATA13	0.996881	0.000252157	0.00263928
						CAMSAP1	1.00029	0.00192822	0.0136871
						PSME4	1.00103	2.04991e-05	0.000315386
						TLE4	1.00175	3.9916e-05	0.000562869
						SYNPO2L	1.00311	0.00848249	0.0430898
						TMEM187	1.00399	0.00587265	0.0326481
						PLAA	1.00445	0.000899331	0.00749733
						LIMK2	1.00689	0.000202081	0.00217036
						BRPF3	1.008	0.00455701	0.0268754
						GTPBP4	1.00815	4.87075e-07	1.11321e-05
						GMFB	1.00818	0.00376136	0.0231104
						PTP4A1	1.00869	0.000165591	0.00184766
						GUSB	1.00945	8.07329e-06	0.000137391
						ALAS1	1.0106	0.000987349	0.00810963
						RAB3GAP1	1.01191	0.00204125	0.0143281
						ZNF410	1.01533	2.84106e-05	0.000414848
						CEP126	1.01733	6.85165e-05	0.000883246
						TICAM1	1.01984	2.82615e-05	0.000413307
						SIK1B	1.01986	0.00519795	0.0297538
						IHO1	1.02279	0.00617863	0.0340887
						GTPBP1	1.02321	9.08031e-06	0.000152337
						IQSEC1	1.02357	1.57426e-07	4.10348e-06
						CD58	1.02537	0.000281562	0.00290211
						TGFB1	1.02548	0.00347661	0.0216847
						CNST	1.02681	0.00329234	0.0207819
						BTG1	1.03009	3.23028e-06	6.07652e-05
						CCDC113	1.03028	0.0067557	0.0364854
						BAP1	1.03334	2.78738e-07	6.8325e-06
						CENPC	1.03441	1.51206e-05	0.00023885
						CD81	1.03627	0.000472516	0.00442668
						ZMIZ1	1.03645	7.9456e-05	0.000995778
						CCAR2	1.03922	0.00357077	0.0221814
						CLNK	1.04045	0.0067618	0.0364975
						HLX	1.04115	0.00592407	0.0328953
						RHBDD3	1.04145	0.00400957	0.0243352
						CSNK1A1	1.04262	4.32383e-10	1.98602e-08
						PLSCR1	1.04319	6.33496e-08	1.83869e-06
						UBA6	1.04332	0.00439615	0.0260303
						ELF1	1.04811	2.81018e-07	6.85308e-06
						ZGRF1	1.04843	0.00105158	0.00848983
						PNMA2	1.04921	0.000916228	0.00760762
						FNIP1	1.04994	1.78651e-05	0.000277569
						TAB2	1.05059	0.00242431	0.0163615
						HEG1	1.05075	0.00502515	0.0289927
						GRAMD1B	1.05302	0.00940809	0.046738
						MAP1LC3B	1.05319	0.000204867	0.00219531
						GNA15	1.05332	0.000108236	0.00129636
						TMCC3	1.05647	0.00617263	0.0340755
						P2RX1	1.05659	9.99232e-07	2.11989e-05
						HERC5	1.0566	0.00762052	0.0397056
						TNNT1	1.05695	0.00102331	0.00830744
						PARP14	1.05763	0.000384463	0.0037349
						N4BP2	1.05781	0.00405556	0.0245513
						ADAM8	1.05913	0.000135033	0.00155626
						CD44	1.05973	9.49373e-08	2.64205e-06
						ARL10	1.06033	0.00227568	0.0156194
						SDE2	1.06281	1.17658e-06	2.45757e-05
						NUP153	1.06381	5.03065e-05	0.000673267
						NINJ1	1.06398	1.39753e-07	3.70404e-06
						C2	1.06526	0.00199607	0.0140527
						RASSF5	1.06751	1.28423e-08	4.41869e-07
						ADAM9	1.0678	4.94922e-05	0.000665193
						GBP1	1.07193	0.00458543	0.0269822
						ZFX	1.07204	0.00395281	0.0241456
						HMGCR	1.07657	0.00894079	0.0449271
						STX4	1.07695	0.000756184	0.00651641
						ECPAS	1.07734	0.00269859	0.017686
						PURB	1.07739	0.000193681	0.00209565
						ARID5A	1.0789	1.01809e-06	2.15507e-05
						RUNX1	1.07967	0.000762781	0.00655535
						CWC25	1.08137	1.83544e-08	6.05119e-07
						PIP4P1	1.08234	0.00305961	0.0195873
						ATP11B	1.08449	0.00016081	0.00180283
						PDE8A	1.0847	0.00155125	0.0115302
						C3AR1	1.08583	0.00703962	0.037696
						MCOLN1	1.08618	0.000719349	0.00623876
						B3GALT1	1.08662	0.00570302	0.031836
						GOLT1B	1.08662	0.00655299	0.0357993
						ZMYM2	1.08702	7.40518e-06	0.000127396
						EDRF1	1.08939	0.00144966	0.0109384
						SWAP70	1.09132	4.68467e-06	8.5243e-05
						PEDS1	1.09312	6.26132e-05	0.000820563
						ANKH	1.09678	0.00628996	0.0345619
						NFATC1	1.09761	7.81596e-05	0.000985235
						B4GALNT2	1.09802	3.80036e-06	7.05078e-05
						AGO2	1.09861	0.00381208	0.0233916
						FAM72A	1.09876	0.00621994	0.0342567
						F3	1.10269	0.00138132	0.0105488
						SLC8A1	1.10304	0.000674724	0.0059499
						H3-3B	1.10635	1.30217e-07	3.49041e-06
						PLEKHM2	1.10857	3.72432e-08	1.1331e-06
						CDH17	1.10872	0.00884332	0.0445319
						GGA2	1.10886	3.26939e-05	0.000470852
						CDH23	1.10978	0.00102184	0.00830638
						MPP1	1.11051	6.36041e-05	0.000832395
						TAB3	1.11124	1.03041e-05	0.000169856
						SATB1	1.11159	1.83749e-05	0.000284556
						CYP51A1	1.11471	9.9089e-07	2.10692e-05
						CNOT1	1.11542	6.77968e-05	0.000877556
						OTUD1	1.11759	0.000348708	0.00343695
						PLEKHO2	1.11808	4.60311e-07	1.05715e-05
						HCAR2	1.11922	0.00756726	0.0395676
						TEX2	1.11967	0.00388178	0.0237424
						ERGIC1	1.11981	3.6894e-07	8.74915e-06
						MAPK13	1.12005	0.000688541	0.00603797
						ZFAND2A	1.1205	4.70045e-05	0.000637625
						SELENOK	1.12212	4.70368e-05	0.000637625
						HMGXB3	1.12388	6.91777e-06	0.000119883
						VOPP1	1.12403	4.54167e-06	8.29599e-05
						PFKM	1.12637	0.00133827	0.0102949
						OPA1	1.12786	0.000470656	0.00441362
						SNX8	1.12886	0.000614087	0.0055128
						EZR	1.12932	1.07627e-05	0.000176188
						SEPTIN6	1.12932	8.76551e-07	1.88498e-05
						TTYH3	1.13058	2.35131e-06	4.58085e-05
						ATP6V0D2	1.13118	0.00877553	0.0442848
						ADH1B	1.13154	0.00436152	0.0258738
						LPIN1	1.13211	0.00267897	0.0176275
						FBP1	1.13429	7.9412e-05	0.000995778
						SERPINB10	1.136	0.00173264	0.0125531
						SSH1	1.13607	7.08943e-07	1.55638e-05
						CCDC186	1.1366	0.00106738	0.00859539
						SLC25A13	1.13686	0.00285004	0.0185302
						MTHFR	1.13752	1.99438e-07	5.10023e-06
						PLCD1	1.13973	0.00250455	0.0167477
						SLC22A4	1.14072	4.06206e-05	0.000569411
						CYCS	1.1462	3.34724e-05	0.0004806
						FGD4	1.14679	2.28601e-06	4.48759e-05
						DNTTIP2	1.14713	9.72274e-16	1.13576e-13
						MNT	1.14967	0.00334352	0.020979
						BRAF	1.15017	2.83051e-06	5.39966e-05
						RAB11FIP4	1.15222	0.000247761	0.00259902
						POLG	1.15547	0.00482775	0.0281282
						UGT8	1.15712	0.00809381	0.0416215
						NECAP1	1.15906	6.05913e-07	1.34898e-05
						PYROXD1	1.1596	0.000333373	0.00330951
						SLC30A4	1.16063	0.000419845	0.0040249
						CASP9	1.1613	7.88883e-06	0.00013498
						SKI	1.16339	0.0040841	0.0246925
						ZNFX1	1.16473	8.08653e-12	5.0672e-10
						PLCXD1	1.16484	1.08576e-08	3.79093e-07
						ANKRD10	1.16484	8.08533e-13	6.02389e-11
						GK5	1.16921	5.70424e-07	1.28815e-05
						MRAS	1.17265	0.000827233	0.00696998
						ATXN1L	1.17678	1.92901e-09	7.97045e-08
						GAS2L3	1.17818	2.50266e-06	4.83269e-05
						MFSD12	1.1784	0.000158475	0.00178298
						CD55	1.18031	2.65104e-06	5.07776e-05
						B4GALT1	1.18151	2.31381e-09	9.39627e-08
						SYNJ1	1.18238	0.00265698	0.017499
						RBBP8	1.18321	0.0046831	0.0274855
						TAF13	1.18572	0.000906966	0.00754768
						NIBAN2	1.19176	0.000107536	0.00128962
						PPP1R3B	1.19404	1.82453e-05	0.000283012
						NPC1	1.19743	7.05522e-05	0.000904559
						MASTL	1.19962	0.000508919	0.0047349
						SRGAP2	1.20244	7.96789e-06	0.000136087
						DDX21	1.20365	1.26877e-09	5.35943e-08
						FRMPD1	1.20508	0.000789526	0.00675451
						TSC22D2	1.20656	5.27119e-06	9.41056e-05
						IQCE	1.20695	0.00497058	0.0288361
						JMJD1C	1.20835	6.27077e-12	4.06398e-10
						UBAP1	1.2093	2.02385e-08	6.53979e-07
						DCP1A	1.20985	2.74478e-07	6.76331e-06
						ZBP1	1.21073	0.00241605	0.0163212
						WARS1	1.21244	3.9227e-07	9.18728e-06
						KIF1B	1.2136	3.51444e-08	1.08318e-06
						MAGT1	1.21923	0.00424744	0.0254265
						RAD23B	1.21946	0.000446103	0.00422948
						ZBTB17	1.22107	4.20476e-05	0.000588403
						ITGB1	1.22165	9.79199e-09	3.47855e-07
						GAB2	1.22388	2.87339e-09	1.15694e-07
						MARCKS	1.22593	9.71073e-06	0.000161766
						NEDD4L	1.22815	0.00451882	0.0266898
						DNAH17	1.2287	4.24591e-05	0.000590805
						SOCS3	1.23	1.02695e-07	2.81652e-06
						SYT5	1.23012	0.000328804	0.00327144
						BCL7B	1.23133	3.90171e-08	1.18327e-06
						DDA1	1.2316	0.000153255	0.00172837
						BAIAP2L1	1.23256	0.00568409	0.031749
						DPH1	1.23311	0.00697103	0.0375198
						TMEM119	1.23826	0.0028139	0.0183369
						CCNH	1.2402	3.53064e-06	6.62836e-05
						CRY2	1.24185	6.08708e-05	0.000801056
						MAN1A1	1.24199	0.00059163	0.00536722
						UPK1B	1.24241	0.00466754	0.0274142
						C6orf223	1.24348	0.00340002	0.021249
						FAM133B	1.24476	2.15502e-07	5.46671e-06
						PSMD12	1.24662	2.94934e-09	1.18249e-07
						MYO6	1.25157	0.00128662	0.00994607
						PEAK1	1.25192	0.000344835	0.00340588
						NMD3	1.25252	1.00831e-07	2.77707e-06
						CD63	1.25315	2.00406e-08	6.51631e-07
						TNIP1	1.25411	1.60976e-10	8.10191e-09
						SLC9A8	1.25797	1.07191e-07	2.92287e-06
						PLAC8	1.25857	0.000289625	0.00296584
						MYO10	1.25869	0.000124621	0.0014648
						ARID3B	1.26053	1.6954e-07	4.39502e-06
						CCNK	1.26247	1.88356e-06	3.79196e-05
						RAB1A	1.26351	4.27019e-12	2.88604e-10
						MTCH1	1.26404	4.266e-08	1.28143e-06
						RUNX3	1.26513	4.2616e-05	0.000592049
						DLST	1.26526	0.00149174	0.0111934
						LIPN	1.2662	0.00331749	0.0208572
						ALDH8A1	1.26679	0.00819488	0.0420271
						RNF11	1.26973	0.000615345	0.00551394
						PLEK	1.26992	5.31313e-12	3.51558e-10
						FNIP2	1.27034	0.000461376	0.0043395
						LCP2	1.27255	2.37921e-05	0.000360771
						BRIP1	1.27336	0.000333679	0.00330951
						RLF	1.27348	1.39516e-07	3.70404e-06
						TP53BP1	1.27377	0.00107587	0.00862704
						FEM1C	1.27524	8.38406e-07	1.81949e-05
						AP1G1	1.27642	6.71915e-07	1.48544e-05
						USP30	1.27698	0.00163548	0.0119589
						TG	1.27962	0.00555276	0.0311997
						SMURF1	1.28116	8.81441e-06	0.000148139
						CCND2	1.2812	0.000307668	0.00310689
						KLF9	1.28122	0.00363568	0.0224549
						PIK3R5	1.28325	1.30738e-12	9.44307e-11
						C5AR1	1.28642	5.73409e-07	1.29057e-05
						RELB	1.28748	7.77906e-06	0.000133343
						CYTIP	1.28922	4.86399e-10	2.20206e-08
						PKN2	1.29042	4.48803e-05	0.000617235
						FANCI	1.2908	0.0082969	0.0424124
						ADAM28	1.29133	0.0010857	0.00866179
						TSC22D1	1.29144	0.00110892	0.00883213
						SLC11A1	1.2921	6.62694e-09	2.47842e-07
						TNF	1.29755	6.57281e-06	0.000114534
						SLC4A5	1.29756	2.45304e-05	0.000369596
						LPCAT1	1.29768	7.45755e-05	0.000948432
						BTBD19	1.30047	0.000312983	0.00315047
						DENND5A	1.3059	1.64319e-11	9.59745e-10
						RARG	1.30738	6.23592e-05	0.000819256
						BTG3	1.30813	0.00114113	0.00902787
						MTSS1	1.30872	1.51136e-07	3.98342e-06
						ZNF470	1.31664	0.0013917	0.0106105
						FTH1	1.31888	4.29743e-10	1.98353e-08
						DKC1	1.32059	8.04918e-07	1.75487e-05
						GPCPD1	1.32071	5.59544e-09	2.11776e-07
						MX1	1.32202	5.66236e-05	0.000751434
						SCO2	1.3222	8.47016e-08	2.38526e-06
						TENT4B	1.3224	5.48894e-06	9.75206e-05
						KLF11	1.32507	8.82308e-10	3.8124e-08
						SLC35E4	1.327	0.00020003	0.00215568
						PTGS2	1.3278	0.00051899	0.00481912
						BCL3	1.32983	0.000620696	0.00555107
						ATP1B4	1.33158	0.000858521	0.00720153
						DDX24	1.33186	1.29056e-05	0.000209097
						KCNE4	1.33529	0.000916581	0.00760762
						ITGAX	1.3354	1.05001e-07	2.87143e-06
						TNS1	1.3395	0.00739361	0.0390175
						ARF6	1.34036	3.22294e-10	1.51675e-08
						ADAM17	1.34925	9.81581e-09	3.47855e-07
						AHR	1.34967	1.58426e-14	1.57792e-12
						GPRIN3	1.35324	0.00102372	0.00830744
						RHOU	1.35326	0.000211148	0.00224734
						CCDC9	1.35652	0.000176457	0.00194823
						EHD4	1.35805	7.55233e-09	2.78055e-07
						SLC43A2	1.35945	2.8785e-10	1.37557e-08
						TCN2	1.35985	0.00029106	0.00297409
						STK38L	1.36167	0.000562792	0.0051401
						MIER2	1.36372	0.00260065	0.0172848
						ARRDC4	1.36386	0.00027714	0.00285965
						RHBDL2	1.36756	0.000839855	0.00706374
						CAPN7	1.3677	0.000422671	0.00403806
						NDRG1	1.3701	2.01404e-07	5.13663e-06
						PLEKHH2	1.37182	0.0021574	0.0149878
						ANKDD1A	1.37191	1.44809e-05	0.00023106
						ARL5B	1.37297	0.000615608	0.00551394
						AFF4	1.37358	5.90954e-08	1.7258e-06
						ITPRIP	1.37424	2.84872e-07	6.92919e-06
						ARIH1	1.37495	0.000178325	0.00196657
						SAMD4A	1.37969	0.0016342	0.0119588
						ETF1	1.38029	8.86741e-12	5.51996e-10
						RLIM	1.38059	2.39559e-12	1.67904e-10
						NKG7	1.3831	0.000532551	0.00492089
						NFKBIZ	1.38485	1.42454e-08	4.84856e-07
						ORC6	1.38644	0.000289174	0.00296442
						TUBB4B	1.38828	1.23958e-11	7.37664e-10
						BIN3	1.38853	7.22906e-07	1.57971e-05
						CEBPB	1.38974	4.88215e-06	8.7823e-05
						UBASH3B	1.38992	0.000131776	0.00153177
						METTL1	1.3918	0.00130679	0.0100773
						CD300E	1.39193	1.3835e-07	3.69726e-06
						PTPN1	1.39571	1.75704e-12	1.25001e-10
						FAM222B	1.39701	0.000890197	0.00744743
						PAFAH1B1	1.40132	4.5407e-09	1.73242e-07
						FFAR1	1.4055	0.00226865	0.0155889
						RNASE2	1.40679	0.000126742	0.00148236
						ZBTB49	1.4074	0.000817124	0.00690941
						GK	1.4094	0.000399509	0.0038573
						RELT	1.41142	1.57005e-09	6.57335e-08
						SPAG5	1.41279	0.00728279	0.0385833
						PIGA	1.41459	5.77052e-08	1.69567e-06
						SRC	1.41531	6.49444e-06	0.000113377
						GBP5	1.41619	0.000106978	0.00128456
						STARD8	1.41651	3.79666e-05	0.000537784
						TBC1D7	1.4167	1.00108e-07	2.76965e-06
						MX2	1.41723	1.53433e-07	4.03273e-06
						EMD	1.41963	1.32336e-10	6.80523e-09
						FCAR	1.42182	2.45657e-16	3.09921e-14
						CUL4A	1.42212	7.67357e-08	2.17387e-06
						C5orf58	1.42251	0.00324985	0.0205549
						JOSD1	1.42298	3.18823e-11	1.77453e-09
						NOCT	1.42312	4.09581e-07	9.54545e-06
						CEP295NL	1.42443	0.00127662	0.00990112
						C1orf210	1.42707	0.00240803	0.0162981
						B4GALT5	1.42732	2.02827e-09	8.34412e-08
						RBM7	1.42933	1.2534e-06	2.60081e-05
						JUP	1.42961	0.000184366	0.00201906
						RIPOR3	1.43107	8.38282e-05	0.00103414
						PRKCE	1.43361	0.00141659	0.0107457
						EPC1	1.43559	2.35247e-08	7.37056e-07
						TMEM104	1.43742	2.79452e-07	6.8325e-06
						SMG6	1.44153	0.000592581	0.00536723
						ST3GAL1	1.44282	9.44991e-09	3.37415e-07
						TOP1	1.44312	3.43148e-09	1.35286e-07
						GATAD2A	1.44949	1.29001e-07	3.46763e-06
						MIXL1	1.4508	0.000581295	0.00528867
						NXT1	1.45255	8.51984e-07	1.84052e-05
						ZNF267	1.45722	5.32957e-10	2.40135e-08
						HMOX1	1.4612	4.96268e-05	0.000666055
						DHX34	1.46407	3.84549e-07	9.09651e-06
						PFDN1	1.46432	3.31895e-09	1.31397e-07
						SLC26A11	1.46632	0.000622377	0.00556084
						HAUS8	1.46702	5.09918e-05	0.000679556
						PIK3R1	1.47039	0.000163867	0.00183275
						ETV3	1.47274	1.99318e-06	3.97354e-05
						AXL	1.47344	1.59011e-05	0.000249513
						ALCAM	1.47358	6.69941e-05	0.000870739
						CDADC1	1.47384	0.000420813	0.00402602
						JMJD6	1.47661	4.00653e-13	3.10736e-11
						FAM102B	1.47897	1.43044e-05	0.00022863
						FAM20C	1.47983	0.000527687	0.0048855
						ZCCHC2	1.4822	5.85477e-06	0.000103162
						PRMT9	1.48296	0.000256554	0.00267613
						DSE	1.48468	1.62223e-06	3.30097e-05
						CLEC5A	1.48483	0.00061381	0.0055128
						BCL6	1.48508	6.74432e-09	2.50254e-07
						MT2A	1.48583	5.77752e-05	0.000765643
						KLF10	1.48694	2.50543e-10	1.21571e-08
						SLC6A6	1.48955	7.11042e-08	2.02038e-06
						HMGB3	1.49044	0.00224881	0.0154976
						FOXO3	1.49093	3.32336e-16	4.13759e-14
						MIOS	1.49124	0.000341725	0.00337868
						FNDC3B	1.49318	5.74225e-07	1.29057e-05
						EIF2AK2	1.49469	2.74756e-11	1.56611e-09
						ATG2A	1.50289	6.60539e-08	1.90549e-06
						CCDC59	1.51075	1.52929e-05	0.000241169
						CXCL16	1.51229	5.83915e-08	1.71053e-06
						TPM4	1.51302	6.49099e-14	5.96289e-12
						HERC6	1.51799	0.0053166	0.0302629
						RNF19A	1.52157	7.06881e-09	2.6127e-07
						AGFG1	1.52763	4.817e-07	1.10359e-05
						SLC1A3	1.53256	0.00236753	0.0160827
						HS3ST3B1	1.53374	0.000173447	0.00191948
						ZNF518B	1.54019	0.000511898	0.00475794
						AQP9	1.54279	1.12189e-06	2.35896e-05
						KLHDC7B	1.54342	0.000690993	0.00605387
						OR2B11	1.54408	1.04237e-05	0.000171424
						PER2	1.55008	3.38859e-13	2.64982e-11
						SH3BP5	1.55068	9.79607e-12	6.01886e-10
						EPSTI1	1.55078	2.59729e-05	0.000385802
						DENND1B	1.55711	0.000379725	0.00370408
						NAB1	1.55803	4.35029e-05	0.00060179
						JARID2	1.5605	9.05296e-07	1.93799e-05
						TGIF1	1.56678	1.98941e-06	3.97354e-05
						PTPRE	1.56805	1.27736e-13	1.12956e-11
						ADARB1	1.57034	0.000345905	0.00341288
						DCUN1D3	1.57056	3.57714e-05	0.000510511
						PRR33	1.57074	0.000416499	0.00400093
						TENT4A	1.57192	1.85334e-08	6.08899e-07
						TMEM273	1.57256	0.000182482	0.00200307
						ID2	1.57309	6.38435e-16	7.7447e-14
						FUT9	1.57368	0.000182768	0.00200388
						ICAM1	1.57431	7.57519e-16	8.95955e-14
						ITGB7	1.57485	5.72036e-08	1.68617e-06
						PTS	1.576	3.83023e-06	7.09229e-05
						ZBTB7A	1.58293	7.61738e-05	0.000964868
						CLU	1.58692	0.00315429	0.0200847
						ISG20	1.58714	3.20921e-05	0.000463596
						PLEKHG2	1.59175	8.62833e-10	3.76227e-08
						TOMM40L	1.59448	7.87237e-09	2.876e-07
						LITAF	1.60089	1.65558e-07	4.3036e-06
						NFKBIE	1.60397	6.20774e-06	0.000108773
						IL1RN	1.60623	8.17951e-10	3.58308e-08
						MEF2D	1.61229	9.04913e-08	2.52575e-06
						IFITM2	1.61671	8.23633e-13	6.08845e-11
						SDC3	1.61861	0.00123968	0.0096781
						EHD1	1.61994	2.63875e-11	1.5132e-09
						NFKBIA	1.62298	3.1226e-13	2.46217e-11
						C17orf107	1.62367	0.000498581	0.00465244
						JUND	1.62459	2.24686e-08	7.1103e-07
						CDCP1	1.63312	2.41426e-05	0.000365499
						FLT1	1.63534	8.0747e-05	0.00100795
						CRLF2	1.63811	0.000667247	0.00590598
						MAPK7	1.63898	2.00758e-06	3.99069e-05
						USP36	1.64025	6.3899e-07	1.41595e-05
						MSR1	1.64281	0.00173559	0.0125566
						POLR1F	1.64332	8.41138e-07	1.82125e-05
						ADA	1.64385	0.000454623	0.0042845
						NOTCH2NLC	1.64734	8.55842e-06	0.000144865
						ACSL3	1.64879	5.04436e-05	0.000674148
						FGFRL1	1.65022	2.54414e-05	0.000379694
						NTSR1	1.65044	0.000299085	0.00303613
						GFOD1	1.65142	1.24835e-07	3.36522e-06
						GADD45B	1.65195	4.54317e-07	1.04592e-05
						GNL1	1.65364	1.93796e-08	6.34498e-07
						LMNA	1.66557	9.899e-05	0.00120082
						ETS2	1.66841	1.94631e-08	6.35035e-07
						SLC25A25	1.6706	1.02575e-08	3.6215e-07
						MALT1	1.67102	1.36137e-08	4.66713e-07
						CMPK2	1.67279	2.79821e-05	0.000410491
						MAPKAPK2	1.67369	1.1377e-06	2.3869e-05
						IRAK1	1.6743	1.60856e-09	6.70495e-08
						SRGN	1.67832	1.12715e-11	6.75006e-10
						OXSR1	1.68519	2.41025e-17	3.35379e-15
						RNMT	1.68562	5.98872e-06	0.00010513
						LANCL2	1.68596	1.02074e-05	0.000168709
						HMGA1	1.68611	2.83957e-10	1.36386e-08
						IRF2BP2	1.68613	1.0511e-15	1.21287e-13
						SH2B1	1.68721	5.49339e-06	9.75206e-05
						FAM107B	1.69871	1.44877e-07	3.82914e-06
						FARP2	1.70255	1.49245e-05	0.000236939
						EIF2AK3	1.70671	9.90016e-07	2.10692e-05
						TUBA1C	1.70763	2.37715e-10	1.15941e-08
						IVNS1ABP	1.70893	5.01958e-13	3.83414e-11
						KLF3	1.70911	1.26559e-16	1.61824e-14
						PDE4A	1.71028	8.71342e-11	4.58035e-09
						IL4I1	1.71117	0.000102961	0.00124262
						SPAG9	1.71606	0.00152569	0.0113849
						NRIP1	1.72001	2.04568e-10	1.01342e-08
						ACVR1B	1.73036	2.64492e-06	5.07632e-05
						CEP170	1.7316	3.3828e-07	8.06249e-06
						ARL4A	1.73583	2.86739e-13	2.3389e-11
						RAPGEF1	1.74032	2.95719e-08	9.14409e-07
						RIPK2	1.74102	9.72285e-12	6.01292e-10
						SYNPO2	1.74672	4.92332e-05	0.000662653
						CLEC7A	1.74826	2.2508e-24	7.34381e-22
						FSIP1	1.75175	0.000986001	0.00810559
						LDLR	1.76024	2.21301e-12	1.56265e-10
						RAB20	1.76171	1.18019e-10	6.10216e-09
						FLNB	1.76203	0.000372475	0.00365218
						SLA	1.76588	6.59163e-11	3.54375e-09
						SRXN1	1.77056	8.69113e-09	3.12022e-07
						SPHK1	1.77061	4.75256e-06	8.61469e-05
						MARCKSL1	1.77142	4.01681e-09	1.55131e-07
						IPPK	1.77627	8.23733e-05	0.0010242
						DOT1L	1.79115	8.80612e-06	0.000148139
						H1-0	1.79916	3.95238e-09	1.53268e-07
						AEN	1.79997	4.34308e-07	1.00475e-05
						ZNF491	1.80265	0.000118044	0.00139792
						SERPING1	1.81609	0.000168631	0.00187717
						CHD1	1.82646	7.23385e-11	3.84532e-09
						ID1	1.83413	4.87971e-06	8.7823e-05
						ANPEP	1.838	1.07673e-10	5.59782e-09
						COG3	1.84345	2.41845e-05	0.000365548
						SERPINB2	1.84382	0.00021418	0.00227704
						CCR1	1.85836	4.67091e-12	3.13448e-10
						GNA12	1.8584	1.24785e-07	3.36522e-06
						MYH10	1.85937	8.17113e-07	1.77736e-05
						TXNDC11	1.8656	7.0241e-12	4.49068e-10
						RABGEF1	1.86636	7.749e-09	2.8419e-07
						UPP1	1.86853	9.39311e-17	1.2175e-14
						PDE4B	1.87185	2.49932e-07	6.23973e-06
						CCR5	1.87513	1.32813e-05	0.000214084
						MS4A4A	1.87719	1.22318e-06	2.54367e-05
						RGS1	1.87896	0.000434215	0.00413334
						TIMP1	1.88767	1.36297e-11	8.06024e-10
						LY6E	1.88828	3.94624e-10	1.83036e-08
						RFX2	1.89251	1.45441e-05	0.000231677
						RSAD2	1.90793	1.16646e-05	0.000189966
						PNP	1.91027	1.4362e-13	1.24673e-11
						ADNP2	1.91111	2.29504e-08	7.23856e-07
						SAT1	1.91232	1.20672e-36	1.14179e-33
						H2AW	1.92775	4.98192e-05	0.000667691
						TMEM52B	1.92841	9.56656e-08	2.65451e-06
						KCTD7	1.93116	2.87159e-11	1.627e-09
						GLUL	1.93309	2.7636e-17	3.78974e-15
						IFI6	1.93374	3.27397e-09	1.30161e-07
						TLNRD1	1.93508	1.33305e-06	2.748e-05
						CDCA4	1.94062	7.91159e-08	2.23461e-06
						SLC16A6	1.94245	2.35288e-06	4.58085e-05
						OLR1	1.94404	1.32304e-05	0.000213628
						MIDN	1.94612	1.03622e-11	6.24505e-10
						NLRP3	1.95019	2.58153e-15	2.84028e-13
						LHFPL2	1.95547	4.20237e-06	7.72094e-05
						CTNNB1	1.96408	8.83312e-19	1.44102e-16
						CPEB2	1.96893	3.99455e-07	9.33244e-06
						GMPR	1.97008	7.48609e-05	0.000950784
						CXCR4	1.97497	2.12757e-08	6.77813e-07
						FOSL2	1.97561	1.38866e-21	3.12846e-19
						TRMT6	1.98323	1.25406e-14	1.27591e-12
						LGALS3BP	1.98405	7.45478e-12	4.73404e-10
						HIC1	1.9972	0.000154427	0.00173951
						SERTAD1	2.00039	2.69819e-21	5.67339e-19
						CLCF1	2.0018	1.67544e-05	0.000262034
						HSD3B7	2.00233	1.50389e-06	3.08524e-05
						IFI44	2.00362	1.03504e-11	6.24505e-10
						REC8	2.00384	1.49481e-13	1.28581e-11
						CCL7	2.01494	1.54875e-08	5.25244e-07
						EGR1	2.01762	1.16628e-09	4.9486e-08
						DHRS3	2.01773	0.000131982	0.00153228
						SMOX	2.0259	0.000134683	0.00155411
						TLE3	2.02812	8.32697e-11	4.40166e-09
						ZBTB21	2.02877	3.60098e-06	6.73368e-05
						DDX60L	2.03159	2.96314e-05	0.00043068
						CD22	2.04943	7.45485e-05	0.000948432
						IL1B	2.05339	6.93279e-11	3.70611e-09
						CCRL2	2.05467	1.50969e-06	3.08524e-05
						PLK2	2.05988	0.000105372	0.00126848
						SMAD7	2.06613	7.9954e-05	0.00100069
						DNAJB5	2.07167	2.60207e-05	0.000385905
						FABP5	2.07246	2.06873e-06	4.0865e-05
						ARID5B	2.08276	3.65888e-07	8.69858e-06
						APOBEC3B	2.08402	6.76381e-05	0.000876701
						CREM	2.09355	3.54892e-08	1.09025e-06
						HS3ST1	2.10097	9.27935e-05	0.00113493
						IL3RA	2.11809	5.00756e-08	1.48998e-06
						TSPYL2	2.14463	8.44946e-06	0.000143277
						TRIB1	2.14493	6.68632e-24	2.10886e-21
						GZF1	2.14922	2.60012e-12	1.79579e-10
						USP18	2.15121	3.83882e-06	7.09431e-05
						SKIL	2.16076	6.40407e-12	4.12213e-10
						SDS	2.16495	4.89206e-05	0.000659382
						PFKFB3	2.17137	7.29706e-13	5.52359e-11
						MXD1	2.17855	9.08908e-22	2.15002e-19
						SMAD3	2.18537	8.03762e-12	5.0672e-10
						TREM1	2.19266	1.88594e-14	1.83967e-12
						CYB5D1	2.20473	1.63791e-11	9.59745e-10
						LONRF3	2.20806	5.7415e-10	2.56255e-08
						TUBB6	2.23516	9.0522e-15	9.30999e-13
						RNF152	2.23666	2.02511e-08	6.53979e-07
						ERMN	2.23861	5.22879e-06	9.35252e-05
						RALGDS	2.23926	5.58251e-12	3.66818e-10
						SLC2A3	2.25042	2.26415e-20	4.37211e-18
						CHSY1	2.2578	6.46772e-20	1.19995e-17
						CD9	2.27343	1.00963e-07	2.77707e-06
						MMP19	2.27526	2.31762e-08	7.28547e-07
						SAMSN1	2.28004	1.6117e-13	1.36774e-11
						SPRED2	2.28025	2.43868e-07	6.10445e-06
						IL1RAP	2.30642	5.0684e-11	2.78821e-09
						PIM3	2.30703	5.46241e-22	1.32527e-19
						HAVCR2	2.32291	1.61897e-13	1.36774e-11
						ZNF331	2.32496	4.77187e-15	5.13084e-13
						CSF1	2.32543	4.73244e-06	8.5947e-05
						IL1R1	2.32549	2.04678e-09	8.36528e-08
						MAFF	2.32629	1.47211e-10	7.48875e-09
						CD226	2.32892	1.73928e-08	5.75423e-07
						TGM2	2.33196	4.9663e-06	8.89984e-05
						ISG15	2.34519	1.04389e-10	5.45704e-09
						ACSL1	2.35542	2.28531e-28	1.02969e-25
						KBTBD8	2.35899	7.18302e-07	1.57328e-05
						DOCK10	2.36693	1.62132e-10	8.11687e-09
						ASPH	2.38063	4.12336e-09	1.58599e-07
						NCR3LG1	2.38185	5.00344e-08	1.48998e-06
						PRDM1	2.38488	9.01959e-10	3.87925e-08
						IL10	2.39549	9.97429e-12	6.08882e-10
						SQLE	2.39777	2.44061e-08	7.59639e-07
						VEGFA	2.40099	6.79587e-08	1.95448e-06
						NFIL3	2.40299	2.91234e-13	2.34056e-11
						SDC2	2.41353	1.02167e-05	0.000168709
						NFKBID	2.41812	4.91945e-22	1.22494e-19
						IFITM3	2.42407	9.18783e-17	1.20743e-14
						IER3	2.42435	6.9436e-15	7.30004e-13
						GNA13	2.42492	3.87395e-28	1.66615e-25
						PHACTR1	2.42557	3.482e-21	7.16232e-19
						GPR84	2.42887	3.02616e-10	1.43514e-08
						LONRF1	2.42987	1.13938e-08	3.96354e-07
						FFAR2	2.44616	3.64948e-18	5.39553e-16
						ABCA1	2.45673	2.82691e-10	1.36386e-08
						TNFRSF21	2.46877	2.05437e-06	4.06661e-05
						EAF1	2.50123	1.05109e-36	1.10505e-33
						APOBEC3A	2.50432	1.02248e-22	2.68741e-20
						TAMALIN	2.51263	1.03776e-08	3.65029e-07
						TFRC	2.51328	2.04721e-13	1.69918e-11
						CCL3L3	2.52148	4.22992e-07	9.82422e-06
						ADM	2.52229	4.25829e-18	6.19876e-16
						AHCTF1	2.52918	5.14055e-11	2.81156e-09
						PLIN2	2.53195	3.4751e-10	1.61977e-08
						RGL1	2.53605	4.08645e-08	1.2314e-06
						SLC2A1	2.53948	5.93894e-06	0.00010445
						IRAK2	2.54441	4.56762e-16	5.61284e-14
						PLAUR	2.55181	2.21226e-23	6.34315e-21
						EREG	2.55186	8.11668e-17	1.08169e-14
						GABARAPL1	2.55315	3.85608e-19	6.7567e-17
						INSIG1	2.56606	1.34056e-10	6.8564e-09
						KDM6B	2.57288	6.49849e-19	1.07875e-16
						SFMBT2	2.57462	3.05544e-11	1.71617e-09
						STARD4	2.57776	8.39667e-13	6.15886e-11
						FAM20A	2.5793	3.88924e-07	9.15422e-06
						CSRNP1	2.58616	7.58679e-33	4.78575e-30
						TUBB2A	2.59066	1.07273e-08	3.75933e-07
						THBS1	2.59447	2.73467e-07	6.75598e-06
						BIN1	2.60283	1.7507e-07	4.51365e-06
						UPB1	2.60614	2.91475e-06	5.52693e-05
						ARL4C	2.60788	7.4926e-15	7.79066e-13
						PTPN7	2.6155	2.23247e-11	1.29593e-09
						SGK1	2.61681	2.97407e-23	8.11742e-21
						SIGLEC1	2.61963	3.06524e-11	1.71617e-09
						NAB2	2.63549	1.83462e-13	1.53621e-11
						BCL2A1	2.65338	1.26208e-31	7.46365e-29
						PI4K2A	2.65339	9.54256e-25	3.2247e-22
						ELL2	2.68009	6.71656e-09	2.50205e-07
						DDIT3	2.68999	1.43783e-23	4.25147e-21
						SNX9	2.69989	9.68399e-14	8.81057e-12
						OASL	2.70075	1.07637e-18	1.72621e-16
						PPIF	2.70192	1.28513e-34	9.35374e-32
						PLK3	2.70274	1.19506e-25	4.18803e-23
						MAFB	2.73815	4.14965e-35	3.56945e-32
						DUSP5	2.74244	6.03251e-12	3.93652e-10
						IFI44L	2.75814	4.14501e-14	3.90743e-12
						EGR2	2.76157	2.73497e-18	4.10767e-16
						PTGES	2.77631	5.26259e-08	1.56096e-06
						ZBTB43	2.78255	3.32623e-40	3.9341e-37
						RAPH1	2.80522	1.80476e-07	4.6404e-06
						OTOF	2.81418	1.65022e-08	5.51745e-07
						MAPK6	2.82748	6.12182e-19	1.03437e-16
						ATP2B1	2.85654	1.56585e-26	5.92643e-24
						PPARG	2.86258	2.36555e-07	5.95289e-06
						BHLHE40	2.86848	1.0343e-40	1.39808e-37
						ATP10A	2.89002	4.1709e-14	3.90743e-12
						NRIP3	2.89745	3.13475e-14	2.99607e-12
						ANKRD28	2.90928	2.64574e-09	1.06983e-07
						CCL4L2	2.91411	2.73932e-08	8.49818e-07
						CXCL8	2.93904	7.53709e-16	8.95955e-14
						CCL3	2.96256	6.19119e-21	1.23709e-18
						MET	2.98206	1.69304e-08	5.6211e-07
						HIF1A	3.00539	1.40485e-31	7.81925e-29
						ZC3H12A	3.01278	4.41103e-29	2.19669e-26
						NAMPT	3.03243	3.00264e-23	8.11742e-21
						TP53INP2	3.06698	4.30889e-15	4.68629e-13
						MN1	3.10239	2.09572e-07	5.33056e-06
						CCL2	3.13251	9.84227e-13	7.16366e-11
						IFITM10	3.20139	8.87275e-08	2.48385e-06
						PDCD1	3.20678	6.90276e-08	1.97323e-06
						MAP3K8	3.23939	1.12676e-30	5.923e-28
						CDKN1A	3.26297	1.41661e-61	4.46797e-58
						SLCO4A1	3.26777	6.15166e-09	2.3098e-07
						STX1A	3.27897	3.47573e-09	1.36462e-07
						ADRA2B	3.28319	7.91117e-09	2.87906e-07
						ATP13A3	3.33284	5.02466e-13	3.83414e-11
						THBD	3.33636	2.3981e-17	3.35379e-15
						IFITM1	3.37562	2.96115e-14	2.85902e-12
						TNFRSF12A	3.42897	5.69259e-10	2.55276e-08
						SDC4	3.44607	5.24419e-12	3.4944e-10
						ASTL	3.45879	4.42212e-09	1.69401e-07
						CTSL	3.45885	6.02069e-15	6.40088e-13
						METRNL	3.47068	4.1545e-49	6.55165e-46
						MELTF	3.49905	3.84146e-09	1.4958e-07
						SNAI1	3.50026	2.05109e-09	8.36528e-08
						IL1R2	3.53085	3.9021e-07	9.1617e-06
						PHLDA1	3.59826	1.76395e-19	3.20971e-17
						SPRY2	3.60593	3.03348e-10	1.43514e-08
						DDIT4	3.61055	6.27566e-21	1.23709e-18
						SLC7A5	3.6378	2.98813e-17	4.0391e-15
						GPR183	3.70999	7.49051e-35	5.90627e-32
						FOSL1	3.76155	1.26984e-14	1.27822e-12
						NR4A1	3.76281	2.23626e-33	1.51139e-30
						CCL4	3.78652	1.19177e-13	1.06382e-11
						IFI27	3.84735	2.28194e-19	4.07391e-17
						NR4A3	3.97436	1.54584e-18	2.39782e-16
						RASGEF1B	3.97579	1.51202e-69	7.15337e-66
						EMP1	4.03005	2.2948e-21	5.04963e-19
						RGCC	4.05056	5.0485e-20	9.55377e-18
						B3GNT5	4.05939	1.2766e-26	5.03301e-24
						AVPI1	4.06513	2.44633e-21	5.26073e-19
						AREG	4.07313	2.99803e-13	2.38381e-11
						OSM	4.09114	9.90099e-22	2.28495e-19
						CXCL3	4.19121	1.31189e-13	1.14936e-11
						EGR3	4.19785	2.37755e-18	3.62845e-16
						ATF3	4.22849	4.5527e-19	7.83231e-17
						DUSP2	4.24599	1.51808e-28	7.18201e-26
						TSPOAP1	4.29164	1.07617e-27	4.42727e-25
						CD83	4.31394	2.58079e-73	2.44194e-69
						HBEGF	4.53179	7.92233e-60	1.87403e-56
						C15orf48	4.56113	4.24459e-14	3.93749e-12
						LAMB3	4.741	1.33239e-15	1.51892e-13
						CXCL2	5.08515	7.88088e-24	2.40545e-21
						ADORA2A	5.44469	4.89978e-22	1.22494e-19
						G0S2	5.67116	1.10786e-50	2.09651e-47
